# Supplementary material for: Multi-omics Analysis of the Symbiotic Green Algae, Chlorella Variabilis, Revealing the Genetic Basis of the Obligate Endosymbiotic Lifestyle
Source: Research Square preprint supplement (doi:10.21203/rs.3.rs-713024/v1), 2021-09-21
Supplement: Supplementary file 1 [file 71bcb9556fbf26665f0e21f9.xlsx]

## Sheet: Sheet1
Cluster	OGid	Genecount_sorokiniana	Genecount_variabilis	Genecount_vulgaris	Geneid_variabilis	Length	UniProtID	UniProtDescription	eValueUniProt	SimMean	GOsConut	GOIds	GONames	InterProIds	InterProGOIds	InterPeoGONames	AlabiID	eValueAlabi	ChlamyID	eValueChlamy	JGICvariabilisID	eValueJGICvariabilis	nrId	nrDiscription	TaxonId	eValuenr	CPM_Free1	CPM_Free2	CPM_Log1	CPM_Log2	CPM_Sta1	CPM_Sta2	logFC_Free2Log	FDR_Free2Log	logFC_Free2Sta	FDR_Free2Sta	logFC_Log2Sta	FDR_Log2Sta
NA	OG0000000	101	6	1	g10787	444	---NA---	---NA---	NA	NA	NA	NA	NA	IPR001810 (PFAM); IPR032675 (G3DSA:3.80.10.GENE3D); G3DSA:1.20.1280.50 (GENE3D); IPR036047 (SUPERFAMILY); SSF52058 (SUPERFAMILY)	F:GO:0005515	F:protein binding	---NA---	NA	---NA---	NA	136129	2.18864e-18	XP_005846022.1	XP_005846022.1 hypothetical protein CHLNCDRAFT_136129 [Chlorella variabilis]<>EFN53920.1 hypothetical protein CHLNCDRAFT_136129 [Chlorella variabilis]	554065	3.9e-17	15.9622	15.0213	15.7265	8.12482	12.2891	7.88633	NA	NA	NA	NA	NA	NA
NA	OG0000000	101	6	1	g11611	204	---NA---	---NA---	NA	NA	NA	NA	NA	IPR001810 (PFAM); IPR032675 (G3DSA:3.80.10.GENE3D); G3DSA:1.20.1280.50 (GENE3D); IPR001810 (PROSITE_PROFILES); SSF52058 (SUPERFAMILY); IPR036047 (SUPERFAMILY)	F:GO:0005515	F:protein binding	---NA---	NA	---NA---	NA	138582	2.18533e-148	XP_005844678.1	XP_005844678.1 hypothetical protein CHLNCDRAFT_138582 [Chlorella variabilis]<>EFN52576.1 hypothetical protein CHLNCDRAFT_138582 [Chlorella variabilis]	554065	3e-113	27.2619	18.6304	11.3447	9.28551	8.06472	13.582	NA	NA	NA	NA	NA	NA
2	OG0000000	101	6	1	g1267	301	Q9XI74	PUMP3_ARATH Mitochondrial uncoupling protein 3 OS=Arabidopsis thaliana OX=3702 GN=PUMP3 PE=2 SV=1	8.31596e-88	63.33	NA	NA	NA	IPR002067 (PRINTS); IPR018108 (PFAM); IPR023395 (G3DSA:1.50.40.GENE3D); PTHR45618:SF8 (PANTHER); PTHR45618 (PANTHER); IPR018108 (PROSITE_PROFILES); IPR018108 (PROSITE_PROFILES); IPR018108 (PROSITE_PROFILES); IPR023395 (SUPERFAMILY)	F:GO:0022857; P:GO:0055085	F:transmembrane transporter activity; P:transmembrane transport	Q9XI74	4.59951e-89	101120	3.33871e-96	11705	0	XP_005850107.1	XP_005850107.1 hypothetical protein CHLNCDRAFT_11705, partial [Chlorella variabilis]<>EFN58005.1 hypothetical protein CHLNCDRAFT_11705, partial [Chlorella variabilis]	554065	4.8e-152	9.92836	9.65658	15.3663	59.1058	64.6138	19.1682	2.50623	0.0150877	2.60905	0.01178	NA	NA
1	OG0000000	101	6	1	g1931	174	---NA---	---NA---	NA	NA	NA	NA	NA	IPR001810 (SMART); IPR001810 (PFAM); IPR032675 (G3DSA:3.80.10.GENE3D); IPR036047 (SUPERFAMILY)	F:GO:0005515	F:protein binding	---NA---	NA	---NA---	NA	138582	3.66229e-08	NA	NA	NA	NA	50.3549	49.5022	11.9449	8.08018	5.42449	13.4725	-1.88552	0.00086965	-1.92021	0.000788905	NA	NA
NA	OG0000000	101	6	1	g2428	297	---NA---	---NA---	NA	NA	NA	NA	NA	no IPS match	no IPS match	no IPS match	---NA---	NA	---NA---	NA	132995	4.86909e-12	XP_005844625.1	XP_005844625.1 hypothetical protein CHLNCDRAFT_138929 [Chlorella variabilis]<>EFN52523.1 hypothetical protein CHLNCDRAFT_138929 [Chlorella variabilis]	554065	2e-09	16.7301	11.8513	5.16213	4.33026	1.92017	6.40765	NA	NA	NA	NA	NA	NA
NA	OG0000000	101	6	1	g2429	515	---NA---	---NA---	NA	NA	NA	NA	NA	G3DSA:1.20.1280.50 (GENE3D); IPR001810 (PFAM); IPR032675 (G3DSA:3.80.10.GENE3D); SSF52047 (SUPERFAMILY); IPR036047 (SUPERFAMILY)	F:GO:0005515	F:protein binding	---NA---	NA	---NA---	NA	141596	2.97413e-136	XP_005843042.1	XP_005843042.1 hypothetical protein CHLNCDRAFT_141596 [Chlorella variabilis]<>EFN50940.1 hypothetical protein CHLNCDRAFT_141596 [Chlorella variabilis]	554065	3.1e-106	6.03381	5.12091	8.40347	4.99989	5.23247	4.81943	NA	NA	NA	NA	NA	NA
1	OG0000001	54	28	16	g10134	1066	Q8RWL6	STY17_ARATH Serine/threonine-protein kinase STY17 OS=Arabidopsis thaliana OX=3702 GN=STY17 PE=1 SV=1	1.25045e-27	47.11	NA	NA	NA	IPR001245 (PFAM); G3DSA:1.10.510.10 (GENE3D); G3DSA:3.30.200.20 (GENE3D); mobidb-lite (MOBIDB_LITE); mobidb-lite (MOBIDB_LITE); mobidb-lite (MOBIDB_LITE); mobidb-lite (MOBIDB_LITE); mobidb-lite (MOBIDB_LITE); mobidb-lite (MOBIDB_LITE); mobidb-lite (MOBIDB_LITE); PTHR44329 (PANTHER); PTHR44329:SF127 (PANTHER); IPR000719 (PROSITE_PROFILES); IPR011009 (SUPERFAMILY)	F:GO:0004672; F:GO:0005524; P:GO:0006468	F:protein kinase activity; F:ATP binding; P:protein phosphorylation	Q8RWL6	6.91616e-29	396950	2.27753e-23	138527	0	XP_005844746.1	XP_005844746.1 hypothetical protein CHLNCDRAFT_138527 [Chlorella variabilis]<>EFN52644.1 hypothetical protein CHLNCDRAFT_138527 [Chlorella variabilis]	554065	1.1e-222	0.877645	0.585247	0	0.0892837	0	0.0547662	-3.22329	0.00688602	-4.05801	0.00226292	NA	NA
NA	OG0000001	54	28	16	g11207	967	Q55GU0	Y9955_DICDI Probable serine/threonine-protein kinase DDB_G0267514 OS=Dictyostelium discoideum OX=44689 GN=DDB_G0267514 PE=3 SV=1	1.12757e-35	54.86	NA	NA	NA	IPR000719 (SMART); IPR003609 (PFAM); IPR000719 (PFAM); G3DSA:1.10.510.10 (GENE3D); G3DSA:3.50.4.10 (GENE3D); mobidb-lite (MOBIDB_LITE); mobidb-lite (MOBIDB_LITE); mobidb-lite (MOBIDB_LITE); mobidb-lite (MOBIDB_LITE); mobidb-lite (MOBIDB_LITE); PTHR44329 (PANTHER); IPR017441 (PROSITE_PATTERNS); IPR008271 (PROSITE_PATTERNS); IPR000719 (PROSITE_PROFILES); IPR011009 (SUPERFAMILY)	F:GO:0004672; F:GO:0005524; P:GO:0006468	F:protein kinase activity; F:ATP binding; P:protein phosphorylation	O22100	1.03715e-38	396950	2.19806e-31	133852	0	XP_005847753.1	XP_005847753.1 hypothetical protein CHLNCDRAFT_133852 [Chlorella variabilis]<>EFN55651.1 hypothetical protein CHLNCDRAFT_133852 [Chlorella variabilis]	554065	0	333.121	237.464	210.807	140.086	147.373	201.211	NA	NA	NA	NA	NA	NA
4	OG0000001	54	28	16	g11591	950	O22558	STY8_ARATH Serine/threonine-protein kinase STY8 OS=Arabidopsis thaliana OX=3702 GN=STY8 PE=1 SV=2	1.63865e-44	52.74	NA	NA	NA	IPR000719 (SMART); IPR001245 (PFAM); G3DSA:1.10.510.10 (GENE3D); mobidb-lite (MOBIDB_LITE); mobidb-lite (MOBIDB_LITE); mobidb-lite (MOBIDB_LITE); PTHR44329 (PANTHER); PTHR44329:SF127 (PANTHER); IPR017441 (PROSITE_PATTERNS); IPR008271 (PROSITE_PATTERNS); IPR000719 (PROSITE_PROFILES); cd13999 (CDD); IPR011009 (SUPERFAMILY)	F:GO:0004672; F:GO:0005524; P:GO:0006468	F:protein kinase activity; F:ATP binding; P:protein phosphorylation	O22558	9.06327e-46	396950	2.81067e-45	138601	0	XP_005844764.1	XP_005844764.1 hypothetical protein CHLNCDRAFT_138601 [Chlorella variabilis]<>EFN52662.1 hypothetical protein CHLNCDRAFT_138601 [Chlorella variabilis]	554065	2.6e-276	72.5154	58.5247	70.4691	68.3021	235.605	116.269	NA	NA	1.93274	0.000510661	NA	NA
1	OG0000001	54	28	16	g1161	650	Q23915	KINX_DICDI Probable serine/threonine-protein kinase kinX OS=Dictyostelium discoideum OX=44689 GN=kinX PE=3 SV=2	1.24875e-38	54.12	7	P:GO:0002376; P:GO:0002504; P:GO:0006955; C:GO:0016020; C:GO:0016021; P:GO:0019882; C:GO:0042613	P:immune system process; P:antigen processing and presentation of peptide or polysaccharide antigen via MHC class II; P:immune response; C:membrane; C:integral component of membrane; P:antigen processing and presentation; C:MHC class II protein complex	IPR000719 (SMART); G3DSA:1.10.510.10 (GENE3D); IPR001245 (PFAM); mobidb-lite (MOBIDB_LITE); mobidb-lite (MOBIDB_LITE); mobidb-lite (MOBIDB_LITE); mobidb-lite (MOBIDB_LITE); mobidb-lite (MOBIDB_LITE); mobidb-lite (MOBIDB_LITE); mobidb-lite (MOBIDB_LITE); mobidb-lite (MOBIDB_LITE); PTHR44329 (PANTHER); IPR017441 (PROSITE_PATTERNS); IPR008271 (PROSITE_PATTERNS); IPR000719 (PROSITE_PROFILES); cd13999…	F:GO:0004672; F:GO:0005524; P:GO:0006468	F:protein kinase activity; F:ATP binding; P:protein phosphorylation	A0A1I9LPU6	4.24439e-38	424421	2.27535e-36	57116	0	XP_005850397.1	XP_005850397.1 hypothetical protein CHLNCDRAFT_57116 [Chlorella variabilis]<>EFN58295.1 hypothetical protein CHLNCDRAFT_57116 [Chlorella variabilis]	554065	0	68.0175	77.2039	14.1058	14.464	9.31284	18.4014	-1.87359	0.000337021	-1.90551	0.000301801	NA	NA
1	OG0000001	54	28	16	g1288	632	Q86AE1	Y9853_DICDI Probable serine/threonine-protein kinase DDB_G0271538 OS=Dictyostelium discoideum OX=44689 GN=DDB_G0271538 PE=3 SV=1	6.54658e-32	53.53	NA	NA	NA	IPR000719 (SMART); IPR000719 (PFAM); G3DSA:1.10.510.10 (GENE3D); mobidb-lite (MOBIDB_LITE); mobidb-lite (MOBIDB_LITE); mobidb-lite (MOBIDB_LITE); mobidb-lite (MOBIDB_LITE); PTHR44329 (PANTHER); IPR008271 (PROSITE_PATTERNS); IPR017441 (PROSITE_PATTERNS); IPR000719 (PROSITE_PROFILES); IPR011009 (SUPERFAMILY)	F:GO:0004672; F:GO:0005524; P:GO:0006468	F:protein kinase activity; F:ATP binding; P:protein phosphorylation	A0A1I9LN82	6.7286e-30	206472	9.50583e-30	142162	0	XP_005850346.1	XP_005850346.1 hypothetical protein CHLNCDRAFT_142162 [Chlorella variabilis]<>EFN58244.1 hypothetical protein CHLNCDRAFT_142162 [Chlorella variabilis]	554065	0	43.2789	16.1431	7.08292	8.16946	5.37648	13.1987	-1.47154	0.046622	NA	NA	NA	NA
NA	OG0000001	54	28	16	g1459	982	A7J1T2	M313A_XENLA Mitogen-activated protein kinase kinase kinase 13-A OS=Xenopus laevis OX=8355 GN=map3k13-a PE=2 SV=1	3.38246e-33	47.84	NA	NA	NA	IPR000719 (SMART); G3DSA:3.50.4.10 (GENE3D); G3DSA:1.10.510.10 (GENE3D); IPR000719 (PFAM); mobidb-lite (MOBIDB_LITE); mobidb-lite (MOBIDB_LITE); mobidb-lite (MOBIDB_LITE); PTHR44329 (PANTHER); IPR008271 (PROSITE_PATTERNS); IPR017441 (PROSITE_PATTERNS); IPR000719 (PROSITE_PROFILES); IPR011009 (SUPERFAMILY)	F:GO:0004672; F:GO:0005524; P:GO:0006468	F:protein kinase activity; F:ATP binding; P:protein phosphorylation	Q9LRY7	1.36105e-35	402741	1.2094e-29	57033	0	XP_005850273.1	XP_005850273.1 hypothetical protein CHLNCDRAFT_57033 [Chlorella variabilis]<>EFN58171.1 hypothetical protein CHLNCDRAFT_57033 [Chlorella variabilis]	554065	0	155.947	142.8	106.424	122.319	94.4725	105.918	NA	NA	NA	NA	NA	NA
NA	OG0000001	54	28	16	g1826	546	Q23915	KINX_DICDI Probable serine/threonine-protein kinase kinX OS=Dictyostelium discoideum OX=44689 GN=kinX PE=3 SV=2	2.23592e-30	47.51	7	P:GO:0002376; P:GO:0002504; P:GO:0006955; C:GO:0016020; C:GO:0016021; P:GO:0019882; C:GO:0042613	P:immune system process; P:antigen processing and presentation of peptide or polysaccharide antigen via MHC class II; P:immune response; C:membrane; C:integral component of membrane; P:antigen processing and presentation; C:MHC class II protein complex	IPR000719 (SMART); IPR000719 (PFAM); G3DSA:1.10.510.10 (GENE3D); PIRSF000615 (PIRSF); mobidb-lite (MOBIDB_LITE); mobidb-lite (MOBIDB_LITE); mobidb-lite (MOBIDB_LITE); mobidb-lite (MOBIDB_LITE); PTHR44329 (PANTHER); IPR008271 (PROSITE_PATTERNS); IPR017441 (PROSITE_PATTERNS); IPR000719 (PROSITE_PROFILES); IPR011009 (SUPERFAMILY)	F:GO:0004672; F:GO:0005524; P:GO:0006468	F:protein kinase activity; F:ATP binding; P:protein phosphorylation	F4IAN2	1.71963e-30	206576	4.52864e-28	58145	0	XP_005846738.1	XP_005846738.1 hypothetical protein CHLNCDRAFT_58145 [Chlorella variabilis]<>EFN54636.1 hypothetical protein CHLNCDRAFT_58145 [Chlorella variabilis]	554065	2.2e-232	53.2073	40.6747	17.8274	20.1781	12.3371	30.0119	NA	NA	NA	NA	NA	NA
NA	OG0000001	54	28	16	g2635	933	Q23915	KINX_DICDI Probable serine/threonine-protein kinase kinX OS=Dictyostelium discoideum OX=44689 GN=kinX PE=3 SV=2	4.67825e-41	54.09	7	P:GO:0002376; P:GO:0002504; P:GO:0006955; C:GO:0016020; C:GO:0016021; P:GO:0019882; C:GO:0042613	P:immune system process; P:antigen processing and presentation of peptide or polysaccharide antigen via MHC class II; P:immune response; C:membrane; C:integral component of membrane; P:antigen processing and presentation; C:MHC class II protein complex	IPR000719 (SMART); IPR001245 (PFAM); G3DSA:1.10.510.10 (GENE3D); mobidb-lite (MOBIDB_LITE); mobidb-lite (MOBIDB_LITE); mobidb-lite (MOBIDB_LITE); mobidb-lite (MOBIDB_LITE); mobidb-lite (MOBIDB_LITE); mobidb-lite (MOBIDB_LITE); mobidb-lite (MOBIDB_LITE); mobidb-lite (MOBIDB_LITE); mobidb-lite (MOBIDB_LITE); mobidb-lite (MOBIDB_LITE); mobidb-lite (MOBIDB_LITE); mobidb-lite (MOBIDB_LITE); mobidb-lit…	F:GO:0004672; F:GO:0005524; P:GO:0006468	F:protein kinase activity; F:ATP binding; P:protein phosphorylation	Q9FGB1	3.34537e-40	396950	1.61707e-44	136066	0	XP_005846125.1	XP_005846125.1 hypothetical protein CHLNCDRAFT_136066 [Chlorella variabilis]<>EFN54023.1 hypothetical protein CHLNCDRAFT_136066 [Chlorella variabilis]	554065	0	168.124	155.725	167.049	178.389	200.13	225.089	NA	NA	NA	NA	NA	NA
4	OG0000001	54	28	16	g2636	388	P0DL10	TD1_MAIZE Leucine-rich repeat receptor-like kinase protein THICK TASSEL DWARF1 OS=Zea mays OX=4577 GN=TD1 PE=2 SV=1	7.61291e-25	47.52	NA	NA	NA	IPR032675 (G3DSA:3.80.10.GENE3D); IPR032675 (G3DSA:3.80.10.GENE3D); IPR032675 (G3DSA:3.80.10.GENE3D); IPR001611 (PFAM); PTHR46662:SF2 (PANTHER); PTHR46662 (PANTHER); PTHR46662:SF2 (PANTHER); PTHR46662 (PANTHER); PTHR46662 (PANTHER); SSF52058 (SUPERFAMILY)	F:GO:0005515	F:protein binding	Q8GYK0	1.06063e-24	144672	3.58373e-56	136066	0	XP_005846125.1	XP_005846125.1 hypothetical protein CHLNCDRAFT_136066 [Chlorella variabilis]<>EFN54023.1 hypothetical protein CHLNCDRAFT_136066 [Chlorella variabilis]	554065	9.1e-87	0.987351	0.243853	1.56064	2.36602	8.83279	2.35495	2.18569	0.0351797	3.69888	0.000372265	NA	NA
NA	OG0000001	54	28	16	g276	664	Q869X3	Y9851_DICDI Probable serine/threonine-protein kinase DDB_G0275165 OS=Dictyostelium discoideum OX=44689 GN=DDB_G0275165 PE=3 SV=1	2.09057e-29	53.16	NA	NA	NA	IPR000719 (SMART); G3DSA:1.10.510.10 (GENE3D); IPR001245 (PFAM); PTHR44329 (PANTHER); IPR008271 (PROSITE_PATTERNS); IPR000719 (PROSITE_PROFILES); IPR011009 (SUPERFAMILY)	F:GO:0004672; F:GO:0005524; P:GO:0006468	F:protein kinase activity; F:ATP binding; P:protein phosphorylation	Q8S9K4	1.4391e-32	396950	8.74739e-32	21563	2.3797e-109	PSC72792.1	PSC72792.1 Serine threonine-kinase CTR1 [Micractinium conductrix]	554055	5.7e-198	47.4477	35.7976	23.8899	36.2492	57.8452	37.4601	NA	NA	NA	NA	NA	NA
3	OG0000001	54	28	16	g2993	1185	F4JTP5	STY46_ARATH Serine/threonine-protein kinase STY46 OS=Arabidopsis thaliana OX=3702 GN=STY46 PE=1 SV=1	4.35368e-41	58.1	NA	NA	NA	IPR001245 (PRINTS); IPR000719 (SMART); IPR032675 (G3DSA:3.80.10.GENE3D); IPR032675 (G3DSA:3.80.10.GENE3D); G3DSA:1.10.510.10 (GENE3D); IPR000719 (PFAM); mobidb-lite (MOBIDB_LITE); mobidb-lite (MOBIDB_LITE); mobidb-lite (MOBIDB_LITE); mobidb-lite (MOBIDB_LITE); mobidb-lite (MOBIDB_LITE); mobidb-lite (MOBIDB_LITE); mobidb-lite (MOBIDB_LITE); mobidb-lite (MOBIDB_LITE); PTHR27000 (PANTHER); PTHR27000…	F:GO:0004672; F:GO:0005515; F:GO:0005524; P:GO:0006468	F:protein kinase activity; F:protein binding; F:ATP binding; P:protein phosphorylation	F4JTP5	2.408e-42	144672	6.05355e-44	58858	0	XP_005844589.1	XP_005844589.1 hypothetical protein CHLNCDRAFT_58858 [Chlorella variabilis]<>EFN52487.1 hypothetical protein CHLNCDRAFT_58858 [Chlorella variabilis]	554065	0	83.2118	82.8125	129.173	221.424	166.335	122.074	1.59867	0.00578873	1.29724	0.0278628	NA	NA
NA	OG0000001	54	28	16	g3180	535	Q86HG9	Y9871_DICDI Probable serine/threonine-protein kinase DDB_G0271682 OS=Dictyostelium discoideum OX=44689 GN=DDB_G0271682 PE=3 SV=2	2.3676e-30	51.89	NA	NA	NA	IPR000719 (SMART); G3DSA:1.10.510.10 (GENE3D); IPR001245 (PFAM); PTHR44329 (PANTHER); IPR008271 (PROSITE_PATTERNS); IPR017441 (PROSITE_PATTERNS); IPR000719 (PROSITE_PROFILES); IPR011009 (SUPERFAMILY)	F:GO:0004672; F:GO:0005524; P:GO:0006468	F:protein kinase activity; F:ATP binding; P:protein phosphorylation	A0A1I9LN82	9.09604e-35	102541	1.88519e-29	134744	0	XP_005847070.1	XP_005847070.1 hypothetical protein CHLNCDRAFT_134744 [Chlorella variabilis]<>EFN54968.1 hypothetical protein CHLNCDRAFT_134744 [Chlorella variabilis]	554065	5.4e-231	81.7856	46.4784	41.0569	37.5885	27.7465	43.7582	NA	NA	NA	NA	NA	NA
NA	OG0000001	54	28	16	g3181	349	---NA---	---NA---	NA	NA	NA	NA	NA	no IPS match	no IPS match	no IPS match	---NA---	NA	---NA---	NA	134745	2.40358e-175	XP_005847071.1	XP_005847071.1 expressed protein [Chlorella variabilis]<>EFN54969.1 expressed protein [Chlorella variabilis]	554065	5.1e-137	21.7766	11.5586	9.42389	13.2586	7.8247	12.8701	NA	NA	NA	NA	NA	NA
1	OG0000001	54	28	16	g4264	268	Q55GU0	Y9955_DICDI Probable serine/threonine-protein kinase DDB_G0267514 OS=Dictyostelium discoideum OX=44689 GN=DDB_G0267514 PE=3 SV=1	1.42108e-35	53.06	NA	NA	NA	IPR000719 (SMART); G3DSA:1.10.510.10 (GENE3D); PIRSF000654 (PIRSF); IPR001245 (PFAM); PTHR44329 (PANTHER); IPR008271 (PROSITE_PATTERNS); IPR000719 (PROSITE_PROFILES); IPR011009 (SUPERFAMILY)	F:GO:0004672; F:GO:0005524; P:GO:0006468	F:protein kinase activity; F:ATP binding; P:protein phosphorylation	Q8S9K4	1.0476e-34	396950	2.44505e-33	134418	3.38902e-164	XP_005847472.1	XP_005847472.1 hypothetical protein CHLNCDRAFT_134418 [Chlorella variabilis]<>EFN55370.1 hypothetical protein CHLNCDRAFT_134418 [Chlorella variabilis]	554065	4.5e-125	89.7941	75.692	19.8082	10.5801	11.9531	13.0891	-2.0342	1.09559e-05	-2.22855	1.83719e-06	NA	NA
NA	OG0000001	54	28	16	g4373	1185	Q66HA1	M3K11_RAT Mitogen-activated protein kinase kinase kinase 11 OS=Rattus norvegicus OX=10116 GN=Map3k11 PE=1 SV=1	6.05935e-33	50.93	NA	NA	NA	IPR000719 (SMART); G3DSA:3.50.4.10 (GENE3D); IPR003609 (PFAM); G3DSA:1.10.510.10 (GENE3D); IPR001245 (PFAM); mobidb-lite (MOBIDB_LITE); mobidb-lite (MOBIDB_LITE); mobidb-lite (MOBIDB_LITE); PTHR44329 (PANTHER); PTHR44329:SF127 (PANTHER); IPR008271 (PROSITE_PATTERNS); IPR000719 (PROSITE_PROFILES); IPR011009 (SUPERFAMILY)	F:GO:0004672; F:GO:0005524; P:GO:0006468	F:protein kinase activity; F:ATP binding; P:protein phosphorylation	Q9C902	9.67142e-34	120324	5.76856e-33	133852	9.1813e-100	XP_005850273.1	XP_005850273.1 hypothetical protein CHLNCDRAFT_57033 [Chlorella variabilis]<>EFN58171.1 hypothetical protein CHLNCDRAFT_57033 [Chlorella variabilis]	554065	1.4e-141	0.0548528	0.0487706	0.0600248	0	0.192017	0.109532	NA	NA	NA	NA	NA	NA
1	OG0000001	54	28	16	g4969	677	Q55GU0	Y9955_DICDI Probable serine/threonine-protein kinase DDB_G0267514 OS=Dictyostelium discoideum OX=44689 GN=DDB_G0267514 PE=3 SV=1	4.90451e-33	49.8	NA	NA	NA	IPR000719 (SMART); IPR000719 (PFAM); G3DSA:1.10.510.10 (GENE3D); mobidb-lite (MOBIDB_LITE); mobidb-lite (MOBIDB_LITE); mobidb-lite (MOBIDB_LITE); mobidb-lite (MOBIDB_LITE); mobidb-lite (MOBIDB_LITE); PTHR44329 (PANTHER); IPR017441 (PROSITE_PATTERNS); IPR000719 (PROSITE_PROFILES); IPR011009 (SUPERFAMILY)	F:GO:0004672; F:GO:0005524; P:GO:0006468	F:protein kinase activity; F:ATP binding; P:protein phosphorylation	A0A1I9LS70	7.17352e-29	206472	1.4898e-27	50324	0	XP_005850922.1	XP_005850922.1 hypothetical protein CHLNCDRAFT_50324 [Chlorella variabilis]<>EFN58820.1 hypothetical protein CHLNCDRAFT_50324 [Chlorella variabilis]	554065	4.5e-291	64.3972	6.58403	0.240099	2.72315	0.624056	4.32653	-3.94257	0.0455891	NA	NA	NA	NA
NA	OG0000001	54	28	16	g5900	385	Q55GU0	Y9955_DICDI Probable serine/threonine-protein kinase DDB_G0267514 OS=Dictyostelium discoideum OX=44689 GN=DDB_G0267514 PE=3 SV=1	8.79123e-31	48.77	NA	NA	NA	G3DSA:3.30.200.20 (GENE3D); PIRSF000654 (PIRSF); IPR000719 (PFAM); G3DSA:1.10.510.10 (GENE3D); PTHR44329 (PANTHER); IPR017441 (PROSITE_PATTERNS); IPR000719 (PROSITE_PROFILES); IPR011009 (SUPERFAMILY)	F:GO:0004672; F:GO:0005524; P:GO:0006468	F:protein kinase activity; F:ATP binding; P:protein phosphorylation	F4I5S1	8.44002e-28	402741	2.4557e-28	144137	0	XP_005848826.1	XP_005848826.1 hypothetical protein CHLNCDRAFT_144137 [Chlorella variabilis]<>EFN56724.1 hypothetical protein CHLNCDRAFT_144137 [Chlorella variabilis]	554065	1.4e-204	0.109706	0.438935	0.420173	0.535702	1.00809	0.164299	NA	NA	NA	NA	NA	NA
NA	OG0000001	54	28	16	g6084	1009	Q55GU0	Y9955_DICDI Probable serine/threonine-protein kinase DDB_G0267514 OS=Dictyostelium discoideum OX=44689 GN=DDB_G0267514 PE=3 SV=1	3.43044e-42	55.43	NA	NA	NA	IPR000719 (SMART); IPR032675 (G3DSA:3.80.10.GENE3D); G3DSA:1.10.510.10 (GENE3D); IPR001245 (PFAM); IPR032675 (G3DSA:3.80.10.GENE3D); mobidb-lite (MOBIDB_LITE); mobidb-lite (MOBIDB_LITE); PTHR27000 (PANTHER); PTHR27000:SF706 (PANTHER); IPR008271 (PROSITE_PATTERNS); IPR017441 (PROSITE_PATTERNS); IPR000719 (PROSITE_PROFILES); cd13999 (CDD); SSF52058 (SUPERFAMILY); IPR011009 (SUPERFAMILY)	F:GO:0004672; F:GO:0005524; P:GO:0006468	F:protein kinase activity; F:ATP binding; P:protein phosphorylation	Q8S9K4	2.19118e-40	144672	2.97605e-42	145350	0	XP_005848087.1	XP_005848087.1 hypothetical protein CHLNCDRAFT_145350 [Chlorella variabilis]<>EFN55985.1 hypothetical protein CHLNCDRAFT_145350 [Chlorella variabilis]	554065	0	579.63	381.191	329.656	286.824	405.972	417.757	NA	NA	NA	NA	NA	NA
NA	OG0000001	54	28	16	g6522	956	Q55GU0	Y9955_DICDI Probable serine/threonine-protein kinase DDB_G0267514 OS=Dictyostelium discoideum OX=44689 GN=DDB_G0267514 PE=3 SV=1	6.61019e-41	54.95	NA	NA	NA	IPR000719 (SMART); IPR032675 (G3DSA:3.80.10.GENE3D); IPR013210 (PFAM); IPR032675 (G3DSA:3.80.10.GENE3D); IPR032675 (G3DSA:3.80.10.GENE3D); G3DSA:1.10.510.10 (GENE3D); IPR000719 (PFAM); mobidb-lite (MOBIDB_LITE); mobidb-lite (MOBIDB_LITE); mobidb-lite (MOBIDB_LITE); mobidb-lite (MOBIDB_LITE); mobidb-lite (MOBIDB_LITE); PTHR27000 (PANTHER); PTHR27000:SF617 (PANTHER); PTHR27000:SF617 (PANTHER); PTHR…	F:GO:0004672; F:GO:0005524; P:GO:0006468	F:protein kinase activity; F:ATP binding; P:protein phosphorylation	Q9C9U5	2.01567e-39	144672	1.6716e-54	133695	0	XP_005851970.1	XP_005851970.1 hypothetical protein CHLNCDRAFT_133695 [Chlorella variabilis]<>EFN59868.1 hypothetical protein CHLNCDRAFT_133695 [Chlorella variabilis]	554065	0	68.1272	76.3748	13.1454	33.1689	23.2821	46.4965	NA	NA	NA	NA	NA	NA
2	OG0000001	54	28	16	g6524	948	Q55GU0	Y9955_DICDI Probable serine/threonine-protein kinase DDB_G0267514 OS=Dictyostelium discoideum OX=44689 GN=DDB_G0267514 PE=3 SV=1	3.01918e-34	51.44	NA	NA	NA	IPR000719 (SMART); G3DSA:1.10.510.10 (GENE3D); IPR032675 (G3DSA:3.80.10.GENE3D); IPR000719 (PFAM); IPR013210 (PFAM); mobidb-lite (MOBIDB_LITE); mobidb-lite (MOBIDB_LITE); mobidb-lite (MOBIDB_LITE); mobidb-lite (MOBIDB_LITE); mobidb-lite (MOBIDB_LITE); mobidb-lite (MOBIDB_LITE); PTHR27000:SF706 (PANTHER); PTHR27000 (PANTHER); PTHR27000 (PANTHER); IPR008271 (PROSITE_PATTERNS); IPR017441 (PROSITE_PA…	F:GO:0004672; F:GO:0005524; P:GO:0006468	F:protein kinase activity; F:ATP binding; P:protein phosphorylation	Q9FPR3	1.07407e-34	144672	2.49809e-62	49746	0	XP_005851971.1	XP_005851971.1 hypothetical protein CHLNCDRAFT_49746 [Chlorella variabilis]<>EFN59869.1 hypothetical protein CHLNCDRAFT_49746 [Chlorella variabilis]	554065	3.7e-307	556.592	535.062	1022.76	1053.91	1377.77	1083.22	1.40084	0.00565009	1.67242	0.00097228	NA	NA
1	OG0000001	54	28	16	g6527	1189	A7J1T0	M313B_XENLA Mitogen-activated protein kinase kinase kinase 13-B OS=Xenopus laevis OX=8355 GN=map3k13-b PE=2 SV=1	9.74735e-33	48.84	NA	NA	NA	IPR000719 (SMART); IPR000719 (PFAM); G3DSA:1.10.510.10 (GENE3D); mobidb-lite (MOBIDB_LITE); mobidb-lite (MOBIDB_LITE); mobidb-lite (MOBIDB_LITE); mobidb-lite (MOBIDB_LITE); mobidb-lite (MOBIDB_LITE); mobidb-lite (MOBIDB_LITE); mobidb-lite (MOBIDB_LITE); PTHR44329 (PANTHER); PTHR44329:SF127 (PANTHER); IPR017441 (PROSITE_PATTERNS); IPR008271 (PROSITE_PATTERNS); IPR000719 (PROSITE_PROFILES); IPR0110…	F:GO:0004672; F:GO:0005524; P:GO:0006468	F:protein kinase activity; F:ATP binding; P:protein phosphorylation	Q9M085	1.70092e-35	396950	5.02874e-30	56636	0	XP_005852287.1	XP_005852287.1 hypothetical protein CHLNCDRAFT_56636 [Chlorella variabilis]<>EFN60185.1 hypothetical protein CHLNCDRAFT_56636 [Chlorella variabilis]	554065	0	120.457	62.8165	26.8911	15.8925	15.2174	32.9145	-1.67574	0.00482579	-1.4413	0.0166591	NA	NA
NA	OG0000001	54	28	16	g7479	970	Q55GU0	Y9955_DICDI Probable serine/threonine-protein kinase DDB_G0267514 OS=Dictyostelium discoideum OX=44689 GN=DDB_G0267514 PE=3 SV=1	5.55395e-33	48.01	NA	NA	NA	IPR000719 (SMART); IPR000719 (PFAM); G3DSA:1.10.510.10 (GENE3D); mobidb-lite (MOBIDB_LITE); mobidb-lite (MOBIDB_LITE); mobidb-lite (MOBIDB_LITE); mobidb-lite (MOBIDB_LITE); mobidb-lite (MOBIDB_LITE); PTHR44329 (PANTHER); IPR008271 (PROSITE_PATTERNS); IPR017441 (PROSITE_PATTERNS); IPR000719 (PROSITE_PROFILES); IPR011009 (SUPERFAMILY)	F:GO:0004672; F:GO:0005524; P:GO:0006468	F:protein kinase activity; F:ATP binding; P:protein phosphorylation	Q9M085	9.43585e-35	402741	1.62285e-31	143195	0	XP_005849910.1	XP_005849910.1 hypothetical protein CHLNCDRAFT_143195 [Chlorella variabilis]<>EFN57808.1 hypothetical protein CHLNCDRAFT_143195 [Chlorella variabilis]	554065	0	222.757	70.376	76.4715	78.4804	103.689	57.7784	NA	NA	NA	NA	NA	NA
NA	OG0000001	54	28	16	g7688	871	Q8RWL6	STY17_ARATH Serine/threonine-protein kinase STY17 OS=Arabidopsis thaliana OX=3702 GN=STY17 PE=1 SV=1	2.17614e-39	55.31	NA	NA	NA	IPR001245 (PRINTS); IPR000719 (SMART); IPR000719 (PFAM); IPR032675 (G3DSA:3.80.10.GENE3D); IPR013210 (PFAM); IPR032675 (G3DSA:3.80.10.GENE3D); G3DSA:1.10.510.10 (GENE3D); mobidb-lite (MOBIDB_LITE); mobidb-lite (MOBIDB_LITE); mobidb-lite (MOBIDB_LITE); PTHR27000 (PANTHER); PTHR27000:SF706 (PANTHER); PTHR27000 (PANTHER); IPR008271 (PROSITE_PATTERNS); IPR017441 (PROSITE_PATTERNS); IPR000719 (PROSITE…	F:GO:0004672; F:GO:0005524; P:GO:0006468	F:protein kinase activity; F:ATP binding; P:protein phosphorylation	Q8RWL6	1.20361e-40	396950	1.78987e-45	136568	0	XP_005845820.1	XP_005845820.1 hypothetical protein CHLNCDRAFT_136568 [Chlorella variabilis]<>EFN53718.1 hypothetical protein CHLNCDRAFT_136568 [Chlorella variabilis]	554065	0	279.749	240.098	117.949	414.946	188.033	344.37	NA	NA	NA	NA	NA	NA
1	OG0000001	54	28	16	g8030	551	Q9ESL4	M3K20_MOUSE Mitogen-activated protein kinase kinase kinase 20 OS=Mus musculus OX=10090 GN=Map3k20 PE=1 SV=1	1.46772e-37	51.48	NA	NA	NA	Coil (COILS); IPR001245 (PRINTS); IPR000719 (SMART); PIRSF000615 (PIRSF); IPR001245 (PFAM); G3DSA:1.10.510.10 (GENE3D); mobidb-lite (MOBIDB_LITE); mobidb-lite (MOBIDB_LITE); mobidb-lite (MOBIDB_LITE); mobidb-lite (MOBIDB_LITE); mobidb-lite (MOBIDB_LITE); PTHR44329 (PANTHER); IPR017441 (PROSITE_PATTERNS); IPR000719 (PROSITE_PROFILES); IPR011009 (SUPERFAMILY)	F:GO:0004672; F:GO:0005524; P:GO:0006468	F:protein kinase activity; F:ATP binding; P:protein phosphorylation	Q9LUI6	1.87003e-36	396950	5.0428e-42	138200	0	XP_005851329.1	XP_005851329.1 hypothetical protein CHLNCDRAFT_138200 [Chlorella variabilis]<>EFN59227.1 hypothetical protein CHLNCDRAFT_138200 [Chlorella variabilis]	554065	2.3e-285	59.4605	53.5014	10.9845	7.05341	9.02481	14.3487	-2.21856	3.33445e-06	-1.78404	0.000211332	NA	NA
NA	OG0000001	54	28	16	g8071	779	O22558	STY8_ARATH Serine/threonine-protein kinase STY8 OS=Arabidopsis thaliana OX=3702 GN=STY8 PE=1 SV=2	5.26928e-33	56.94	NA	NA	NA	IPR001245 (PRINTS); IPR000719 (SMART); IPR032675 (G3DSA:3.80.10.GENE3D); IPR032675 (G3DSA:3.80.10.GENE3D); IPR013210 (PFAM); G3DSA:1.10.510.10 (GENE3D); IPR000719 (PFAM); mobidb-lite (MOBIDB_LITE); mobidb-lite (MOBIDB_LITE); PTHR27000:SF706 (PANTHER); PTHR27000 (PANTHER); IPR017441 (PROSITE_PATTERNS); IPR008271 (PROSITE_PATTERNS); IPR000719 (PROSITE_PROFILES); SSF52058 (SUPERFAMILY); IPR011009 (S…	F:GO:0004672; F:GO:0005524; P:GO:0006468	F:protein kinase activity; F:ATP binding; P:protein phosphorylation	O22558	2.91441e-34	144672	4.85144e-38	50123	4.21087e-143	XP_005851655.1	XP_005851655.1 hypothetical protein CHLNCDRAFT_50123 [Chlorella variabilis]<>EFN59553.1 hypothetical protein CHLNCDRAFT_50123 [Chlorella variabilis]	554065	6.4e-233	33.2957	38.9189	25.8707	18.1692	18.5297	16.8132	NA	NA	NA	NA	NA	NA
1	OG0000001	54	28	16	g8805	283	---NA---	---NA---	NA	NA	NA	NA	NA	mobidb-lite (MOBIDB_LITE); mobidb-lite (MOBIDB_LITE); mobidb-lite (MOBIDB_LITE); mobidb-lite (MOBIDB_LITE); mobidb-lite (MOBIDB_LITE); mobidb-lite (MOBIDB_LITE)	no GO terms	no GO terms	---NA---	NA	---NA---	NA	---NA---	NA	PRW50854.1	PRW50854.1 serine threonine- kinase isoform B [Chlorella sorokiniana]	3076	3e-63	4.33337	5.21845	0.12005	0.580344	0	0.219065	-3.15491	0.0013269	-4.95257	9.92352e-06	NA	NA
NA	OG0000001	54	28	16	g9540	457	Q2MHE4	HT1_ARATH Serine/threonine/tyrosine-protein kinase HT1 OS=Arabidopsis thaliana OX=3702 GN=HT1 PE=1 SV=1	2.38079e-25	49.49	NA	NA	NA	IPR000719 (SMART); IPR032675 (G3DSA:3.80.10.GENE3D); G3DSA:1.10.510.10 (GENE3D); IPR000719 (PFAM); mobidb-lite (MOBIDB_LITE); mobidb-lite (MOBIDB_LITE); PTHR44329 (PANTHER); IPR008271 (PROSITE_PATTERNS); IPR000719 (PROSITE_PROFILES); IPR011009 (SUPERFAMILY)	F:GO:0004672; F:GO:0005524; P:GO:0006468	F:protein kinase activity; F:ATP binding; P:protein phosphorylation	Q2MHE4	1.3168e-26	283610	2.95481e-27	141046	4.03191e-108	XP_005843510.1	XP_005843510.1 hypothetical protein CHLNCDRAFT_141046 [Chlorella variabilis]<>EFN51408.1 hypothetical protein CHLNCDRAFT_141046 [Chlorella variabilis]	554065	1.4e-115	202.133	271.603	215.849	177.987	349.135	198.144	NA	NA	NA	NA	NA	NA
NA	OG0000001	54	28	16	g9617	1048	Q55GU0	Y9955_DICDI Probable serine/threonine-protein kinase DDB_G0267514 OS=Dictyostelium discoideum OX=44689 GN=DDB_G0267514 PE=3 SV=1	5.88422e-37	52.14	NA	NA	NA	IPR000719 (SMART); IPR000719 (PFAM); G3DSA:1.10.510.10 (GENE3D); mobidb-lite (MOBIDB_LITE); mobidb-lite (MOBIDB_LITE); mobidb-lite (MOBIDB_LITE); mobidb-lite (MOBIDB_LITE); mobidb-lite (MOBIDB_LITE); PTHR44329 (PANTHER); PTHR44329:SF127 (PANTHER); IPR017441 (PROSITE_PATTERNS); IPR008271 (PROSITE_PATTERNS); IPR000719 (PROSITE_PROFILES); IPR011009 (SUPERFAMILY)	F:GO:0004672; F:GO:0005524; P:GO:0006468	F:protein kinase activity; F:ATP binding; P:protein phosphorylation	Q8S9K4	1.11686e-37	396950	6.98759e-34	56862	0	XP_005850561.1	XP_005850561.1 hypothetical protein CHLNCDRAFT_56862 [Chlorella variabilis]<>EFN58459.1 hypothetical protein CHLNCDRAFT_56862 [Chlorella variabilis]	554065	0	100.106	136.314	56.0631	54.7309	32.1629	66.1576	NA	NA	NA	NA	NA	NA
3	OG0000002	72	7	1	g10392	420	---NA---	---NA---	NA	NA	NA	NA	NA	IPR032675 (G3DSA:3.80.10.GENE3D); SSF52047 (SUPERFAMILY); IPR036047 (SUPERFAMILY)	F:GO:0005515	F:protein binding	---NA---	NA	---NA---	NA	136128	2.3322e-16	PSC67937.1	PSC67937.1 deleted in malignant brain tumors 1 -like isoform B [Micractinium conductrix]	554055	2.8e-09	22.7091	11.0222	59.7246	20.446	30.7228	25.5758	1.62446	0.00969687	NA	NA	NA	NA
NA	OG0000002	72	7	1	g1225	317	---NA---	---NA---	NA	NA	NA	NA	NA	mobidb-lite (MOBIDB_LITE)	no GO terms	no GO terms	---NA---	NA	---NA---	NA	---NA---	NA	PRW44489.1	PRW44489.1 small GTP-binding [Chlorella sorokiniana]	3076	1.3e-38	7.56969	6.58403	5.88243	10.3123	10.1769	8.1054	NA	NA	NA	NA	NA	NA
NA	OG0000002	72	7	1	g1908	511	---NA---	---NA---	NA	NA	NA	NA	NA	IPR032675 (G3DSA:3.80.10.GENE3D); IPR032675 (G3DSA:3.80.10.GENE3D); mobidb-lite (MOBIDB_LITE); IPR036047 (SUPERFAMILY); SSF52047 (SUPERFAMILY)	F:GO:0005515	F:protein binding	---NA---	NA	---NA---	NA	141321	0	XP_005843279.1	XP_005843279.1 expressed protein [Chlorella variabilis]<>EFN51177.1 expressed protein [Chlorella variabilis]	554065	2.1e-240	207.399	185.816	161.767	81.0696	87.5119	123.662	NA	NA	NA	NA	NA	NA
NA	OG0000002	72	7	1	g1979	550	---NA---	---NA---	NA	NA	NA	NA	NA	IPR032675 (G3DSA:3.80.10.GENE3D); IPR032675 (G3DSA:3.80.10.GENE3D); PTHR16083 (PANTHER); SSF52047 (SUPERFAMILY)	no GO terms	no GO terms	---NA---	NA	---NA---	NA	144174	0	XP_005848637.1	XP_005848637.1 hypothetical protein CHLNCDRAFT_144174 [Chlorella variabilis]<>EFN56535.1 hypothetical protein CHLNCDRAFT_144174 [Chlorella variabilis]	554065	1.8e-261	4.60764	2.58484	1.08045	1.16069	4.51241	1.36916	NA	NA	NA	NA	NA	NA
NA	OG0000002	72	7	1	g4787	456	Q7SXW3	LRC40_DANRE Leucine-rich repeat-containing protein 40 OS=Danio rerio OX=7955 GN=lrrc40 PE=2 SV=1	7.50341e-07	44.87	NA	NA	NA	IPR032675 (G3DSA:3.80.10.GENE3D); IPR032675 (G3DSA:3.80.10.GENE3D); mobidb-lite (MOBIDB_LITE); PTHR45752 (PANTHER); SSF52058 (SUPERFAMILY)	no GO terms	no GO terms	---NA---	NA	---NA---	NA	135336	0	XP_005846800.1	XP_005846800.1 hypothetical protein CHLNCDRAFT_135336 [Chlorella variabilis]<>EFN54698.1 hypothetical protein CHLNCDRAFT_135336 [Chlorella variabilis]	554065	3.1e-259	5.48528	6.92543	9.66399	9.19622	6.6246	11.2271	NA	NA	NA	NA	NA	NA
1	OG0000002	72	7	1	g9234	757	P51822	ARF1_DAUCA ADP-ribosylation factor 1 OS=Daucus carota OX=4039 GN=ARF1 PE=2 SV=2	6.67618e-27	58.1	2	F:GO:0071568; P:GO:1990592	F:UFM1 transferase activity; P:protein K69-linked ufmylation	SM00177 (SMART); IPR001810 (PFAM); G3DSA:3.40.50.300 (GENE3D); IPR032675 (G3DSA:3.80.10.GENE3D); IPR006689 (PFAM); PTHR11711:SF330 (PANTHER); PTHR11711 (PANTHER); PS51417 (PROSITE_PROFILES); SSF52047 (SUPERFAMILY); IPR027417 (SUPERFAMILY)	F:GO:0005515; F:GO:0005525	F:protein binding; F:GTP binding	Q6ID97	4.83926e-28	382029	1.14195e-26	18254	2.9202e-40	XP_005851780.1	XP_005851780.1 hypothetical protein CHLNCDRAFT_18254, partial [Chlorella variabilis]<>EFN59678.1 hypothetical protein CHLNCDRAFT_18254, partial [Chlorella variabilis]	554065	8.1e-31	30.0045	18.923	10.0241	5.35702	6.28856	11.1723	-1.25637	0.0333397	NA	NA	NA	NA
3	OG0000002	72	7	1	g983	530	---NA---	---NA---	NA	NA	NA	NA	NA	IPR032675 (G3DSA:3.80.10.GENE3D); IPR032675 (G3DSA:3.80.10.GENE3D); IPR001810 (PFAM); PTHR45752 (PANTHER); SSF52058 (SUPERFAMILY); IPR036047 (SUPERFAMILY)	F:GO:0005515	F:protein binding	---NA---	NA	---NA---	NA	145229	8.60115e-26	XP_005845422.1	XP_005845422.1 hypothetical protein CHLNCDRAFT_137019 [Chlorella variabilis]<>EFN53320.1 hypothetical protein CHLNCDRAFT_137019 [Chlorella variabilis]	554065	3.2e-18	40.3168	33.164	94.1788	178.567	67.8301	84.1209	2.42212	2.98701e-05	1.54143	0.00881587	NA	NA
NA	OG0000003	48	16	1	g10482	600	Q9C9U5	SIS8_ARATH Probable serine/threonine-protein kinase SIS8 OS=Arabidopsis thaliana OX=3702 GN=SIS8 PE=1 SV=1	2.39514e-51	52.86	7	C:GO:0016020; C:GO:0016021; C:GO:0019012; C:GO:0030430; C:GO:0033644; C:GO:0044165; C:GO:0044167	C:membrane; C:integral component of membrane; C:virion; C:host cell cytoplasm; C:host cell membrane; C:host cell endoplasmic reticulum; C:host cell endoplasmic reticulum membrane	IPR001245 (PRINTS); IPR000719 (SMART); G3DSA:1.10.510.10 (GENE3D); IPR001245 (PFAM); mobidb-lite (MOBIDB_LITE); mobidb-lite (MOBIDB_LITE); mobidb-lite (MOBIDB_LITE); PTHR44329 (PANTHER); IPR008271 (PROSITE_PATTERNS); IPR017441 (PROSITE_PATTERNS); IPR000719 (PROSITE_PROFILES); cd13999 (CDD); IPR011009 (SUPERFAMILY)	F:GO:0004672; F:GO:0005524; P:GO:0006468	F:protein kinase activity; F:ATP binding; P:protein phosphorylation	Q8S9K4	8.19481e-57	102541	1.08777e-50	145300	9.42437e-111	PRW61477.1	PRW61477.1 Serine threonine- kinase CTR1 isoform A [Chlorella sorokiniana]<>PRW61478.1 Serine threonine- kinase CTR1 isoform B [Chlorella sorokiniana]	3076	1.4e-102	143.44	105.198	106.724	88.4802	149.773	93.0478	NA	NA	NA	NA	NA	NA
NA	OG0000003	48	16	1	g10849	1023	Q54TM7	DRKD_DICDI Probable serine/threonine-protein kinase drkD OS=Dictyostelium discoideum OX=44689 GN=drkD PE=2 SV=1	2.01661e-55	55.38	NA	NA	NA	IPR000719 (SMART); IPR032675 (G3DSA:3.80.10.GENE3D); G3DSA:1.10.510.10 (GENE3D); IPR001245 (PFAM); IPR032675 (G3DSA:3.80.10.GENE3D); PTHR44329 (PANTHER); PTHR44329:SF47 (PANTHER); IPR017441 (PROSITE_PATTERNS); IPR008271 (PROSITE_PATTERNS); IPR000719 (PROSITE_PROFILES); cd13999 (CDD); IPR011009 (SUPERFAMILY); SSF52058 (SUPERFAMILY)	F:GO:0004672; F:GO:0005524; P:GO:0006468	F:protein kinase activity; F:ATP binding; P:protein phosphorylation	A0A1I9LPU6	7.77031e-60	102541	1.46784e-55	145300	0	XP_005848072.1	XP_005848072.1 hypothetical protein CHLNCDRAFT_145300 [Chlorella variabilis]<>EFN55970.1 hypothetical protein CHLNCDRAFT_145300 [Chlorella variabilis]	554065	0	58.6377	58.7686	73.9505	35.401	32.2589	35.1599	NA	NA	NA	NA	NA	NA
3	OG0000003	48	16	1	g11394	1527	Q54TM7	DRKD_DICDI Probable serine/threonine-protein kinase drkD OS=Dictyostelium discoideum OX=44689 GN=drkD PE=2 SV=1	5.99291e-47	54.01	NA	NA	NA	IPR000719 (SMART); G3DSA:1.10.510.10 (GENE3D); IPR001245 (PFAM); IPR013210 (PFAM); IPR032675 (G3DSA:3.80.10.GENE3D); mobidb-lite (MOBIDB_LITE); mobidb-lite (MOBIDB_LITE); mobidb-lite (MOBIDB_LITE); mobidb-lite (MOBIDB_LITE); mobidb-lite (MOBIDB_LITE); mobidb-lite (MOBIDB_LITE); mobidb-lite (MOBIDB_LITE); mobidb-lite (MOBIDB_LITE); mobidb-lite (MOBIDB_LITE); mobidb-lite (MOBIDB_LITE); mobidb-lite …	F:GO:0004672; F:GO:0005524; P:GO:0006468	F:protein kinase activity; F:ATP binding; P:protein phosphorylation	A0A1I9LPU6	3.69045e-53	102541	4.01919e-47	134046	0	XP_005847828.1	XP_005847828.1 hypothetical protein CHLNCDRAFT_134046 [Chlorella variabilis]<>EFN55726.1 hypothetical protein CHLNCDRAFT_134046 [Chlorella variabilis]	554065	0	242.175	259.801	918.019	2001.16	888.032	915.143	3.07985	1.56388e-06	2.33957	0.000261006	NA	NA
NA	OG0000003	48	16	1	g2626	903	Q54H46	DRKA_DICDI Probable serine/threonine-protein kinase drkA OS=Dictyostelium discoideum OX=44689 GN=drkA PE=3 SV=1	3.82224e-53	57.14	NA	NA	NA	IPR001245 (PRINTS); IPR000719 (SMART); IPR032675 (G3DSA:3.80.10.GENE3D); IPR001245 (PFAM); G3DSA:1.10.510.10 (GENE3D); IPR032675 (G3DSA:3.80.10.GENE3D); mobidb-lite (MOBIDB_LITE); mobidb-lite (MOBIDB_LITE); mobidb-lite (MOBIDB_LITE); PTHR44329:SF47 (PANTHER); PTHR44329 (PANTHER); IPR017441 (PROSITE_PATTERNS); IPR008271 (PROSITE_PATTERNS); IPR000719 (PROSITE_PROFILES); cd13999 (CDD); IPR011009 (SU…	F:GO:0004672; F:GO:0005524; P:GO:0006468	F:protein kinase activity; F:ATP binding; P:protein phosphorylation	A0A1I9LPU6	6.29381e-59	120324	1.36041e-56	144680	3.88117e-178	XP_005845997.1	XP_005845997.1 hypothetical protein CHLNCDRAFT_136055 [Chlorella variabilis]<>EFN53895.1 hypothetical protein CHLNCDRAFT_136055 [Chlorella variabilis]	554065	6.1e-134	77.891	72.1317	63.5662	49.9096	48.8204	52.8494	NA	NA	NA	NA	NA	NA
NA	OG0000003	48	16	1	g2627	874	Q54H46	DRKA_DICDI Probable serine/threonine-protein kinase drkA OS=Dictyostelium discoideum OX=44689 GN=drkA PE=3 SV=1	4.44289e-57	58.42	NA	NA	NA	IPR000719 (SMART); IPR032675 (G3DSA:3.80.10.GENE3D); G3DSA:1.10.510.10 (GENE3D); IPR001245 (PFAM); IPR032675 (G3DSA:3.80.10.GENE3D); mobidb-lite (MOBIDB_LITE); mobidb-lite (MOBIDB_LITE); mobidb-lite (MOBIDB_LITE); PTHR44329:SF47 (PANTHER); PTHR44329 (PANTHER); IPR008271 (PROSITE_PATTERNS); IPR017441 (PROSITE_PATTERNS); IPR000719 (PROSITE_PROFILES); cd13999 (CDD); IPR011009 (SUPERFAMILY); SSF52058…	F:GO:0004672; F:GO:0005524; P:GO:0006468	F:protein kinase activity; F:ATP binding; P:protein phosphorylation	F4JC18	4.22994e-59	102541	6.5081e-54	136055	0	XP_005845997.1	XP_005845997.1 hypothetical protein CHLNCDRAFT_136055 [Chlorella variabilis]<>EFN53895.1 hypothetical protein CHLNCDRAFT_136055 [Chlorella variabilis]	554065	8.7e-162	71.6927	75.1555	55.9431	48.615	41.0437	55.4782	NA	NA	NA	NA	NA	NA
1	OG0000003	48	16	1	g2868	1196	Q05609	CTR1_ARATH Serine/threonine-protein kinase CTR1 OS=Arabidopsis thaliana OX=3702 GN=CTR1 PE=1 SV=1	9.40743e-53	54.1	NA	NA	NA	Coil (COILS); IPR000719 (SMART); IPR032675 (G3DSA:3.80.10.GENE3D); G3DSA:1.10.510.10 (GENE3D); IPR032675 (G3DSA:3.80.10.GENE3D); IPR001245 (PFAM); mobidb-lite (MOBIDB_LITE); mobidb-lite (MOBIDB_LITE); PTHR45974:SF12 (PANTHER); PTHR45974 (PANTHER); PTHR45974:SF12 (PANTHER); PTHR45974 (PANTHER); IPR008271 (PROSITE_PATTERNS); IPR017441 (PROSITE_PATTERNS); IPR000719 (PROSITE_PROFILES); cd13999 (CDD);…	F:GO:0004672; F:GO:0005524; P:GO:0006468	F:protein kinase activity; F:ATP binding; P:protein phosphorylation	A0A1I9LPU6	2.14539e-59	144672	2.27461e-52	136834	0	XP_005845704.1	XP_005845704.1 hypothetical protein CHLNCDRAFT_136834 [Chlorella variabilis]<>EFN53602.1 hypothetical protein CHLNCDRAFT_136834 [Chlorella variabilis]	554065	0	30.0594	56.5251	8.46349	3.88384	13.2972	11.2271	-2.41719	2.52249e-05	-1.32483	0.0232655	NA	NA
3	OG0000003	48	16	1	g3087	722	Q05609	CTR1_ARATH Serine/threonine-protein kinase CTR1 OS=Arabidopsis thaliana OX=3702 GN=CTR1 PE=1 SV=1	7.59668e-57	56.54	NA	NA	NA	IPR001245 (PRINTS); IPR000719 (SMART); IPR001245 (PFAM); G3DSA:1.10.510.10 (GENE3D); mobidb-lite (MOBIDB_LITE); mobidb-lite (MOBIDB_LITE); PTHR44329 (PANTHER); IPR008271 (PROSITE_PATTERNS); IPR017441 (PROSITE_PATTERNS); PS51257 (PROSITE_PROFILES); IPR000719 (PROSITE_PROFILES); cd13999 (CDD); IPR011009 (SUPERFAMILY)	F:GO:0004672; F:GO:0005524; P:GO:0006468	F:protein kinase activity; F:ATP binding; P:protein phosphorylation	A0A1I9LPU6	5.47671e-60	102541	1.74136e-56	36848	0	XP_005844631.1	XP_005844631.1 hypothetical protein CHLNCDRAFT_36848 [Chlorella variabilis]<>EFN52529.1 hypothetical protein CHLNCDRAFT_36848 [Chlorella variabilis]	554065	7.5e-143	75.5324	62.5727	145.2	319.904	83.3835	137.463	2.29413	0.000442009	NA	NA	NA	NA
3	OG0000003	48	16	1	g3088	701	Q05609	CTR1_ARATH Serine/threonine-protein kinase CTR1 OS=Arabidopsis thaliana OX=3702 GN=CTR1 PE=1 SV=1	1.86439e-59	56.05	NA	NA	NA	IPR001245 (PRINTS); IPR000719 (SMART); G3DSA:1.10.510.10 (GENE3D); IPR001245 (PFAM); mobidb-lite (MOBIDB_LITE); mobidb-lite (MOBIDB_LITE); mobidb-lite (MOBIDB_LITE); PTHR44329 (PANTHER); IPR008271 (PROSITE_PATTERNS); IPR017441 (PROSITE_PATTERNS); IPR000719 (PROSITE_PROFILES); cd13999 (CDD); IPR011009 (SUPERFAMILY)	F:GO:0004672; F:GO:0005524; P:GO:0006468	F:protein kinase activity; F:ATP binding; P:protein phosphorylation	Q05609	1.03119e-60	120324	2.27843e-56	36848	5.13458e-148	XP_005844631.1	XP_005844631.1 hypothetical protein CHLNCDRAFT_36848 [Chlorella variabilis]<>EFN52529.1 hypothetical protein CHLNCDRAFT_36848 [Chlorella variabilis]	554065	1.4e-114	65.3297	60.5731	109.305	198.79	63.4617	98.5792	1.81685	0.002041	NA	NA	NA	NA
3	OG0000003	48	16	1	g3285	1409	Q05609	CTR1_ARATH Serine/threonine-protein kinase CTR1 OS=Arabidopsis thaliana OX=3702 GN=CTR1 PE=1 SV=1	1.31686e-56	57.77	NA	NA	NA	IPR001245 (PRINTS); IPR006585 (SMART); IPR000719 (SMART); IPR008979 (G3DSA:2.60.120.GENE3D); IPR001245 (PFAM); G3DSA:1.10.510.10 (GENE3D); IPR032675 (G3DSA:3.80.10.GENE3D); mobidb-lite (MOBIDB_LITE); mobidb-lite (MOBIDB_LITE); mobidb-lite (MOBIDB_LITE); mobidb-lite (MOBIDB_LITE); mobidb-lite (MOBIDB_LITE); mobidb-lite (MOBIDB_LITE); mobidb-lite (MOBIDB_LITE); PTHR44329 (PANTHER); PTHR44329:SF47 (…	F:GO:0004672; F:GO:0005524; P:GO:0006468	F:protein kinase activity; F:ATP binding; P:protein phosphorylation	A0A1I9LPU6	3.86995e-61	102541	3.10757e-58	24126	4.64429e-144	PSC72144.1	PSC72144.1 kinase [Micractinium conductrix]	554055	0	103.233	130.559	159.006	319.323	195.714	139.818	1.56506	0.01406	NA	NA	NA	NA
NA	OG0000003	48	16	1	g3414	897	Q54H46	DRKA_DICDI Probable serine/threonine-protein kinase drkA OS=Dictyostelium discoideum OX=44689 GN=drkA PE=3 SV=1	4.04665e-55	54.23	NA	NA	NA	IPR000719 (SMART); IPR013210 (PFAM); G3DSA:1.10.510.10 (GENE3D); IPR032675 (G3DSA:3.80.10.GENE3D); IPR001245 (PFAM); IPR032675 (G3DSA:3.80.10.GENE3D); mobidb-lite (MOBIDB_LITE); mobidb-lite (MOBIDB_LITE); PTHR44329 (PANTHER); IPR008271 (PROSITE_PATTERNS); IPR017441 (PROSITE_PATTERNS); IPR000719 (PROSITE_PROFILES); cd13999 (CDD); SSF52058 (SUPERFAMILY); IPR011009 (SUPERFAMILY)	F:GO:0004672; F:GO:0005524; P:GO:0006468	F:protein kinase activity; F:ATP binding; P:protein phosphorylation	Q8S9K4	2.66562e-56	102541	2.40622e-48	144680	0	XP_005848395.1	XP_005848395.1 hypothetical protein CHLNCDRAFT_144680 [Chlorella variabilis]<>EFN56293.1 hypothetical protein CHLNCDRAFT_144680 [Chlorella variabilis]	554065	0	185.238	195.863	123.051	126.336	142.525	160.629	NA	NA	NA	NA	NA	NA
1	OG0000003	48	16	1	g376	907	Q54H46	DRKA_DICDI Probable serine/threonine-protein kinase drkA OS=Dictyostelium discoideum OX=44689 GN=drkA PE=3 SV=1	3.55799e-54	57.14	NA	NA	NA	IPR000719 (SMART); IPR013210 (PFAM); IPR001245 (PFAM); G3DSA:3.30.200.20 (GENE3D); G3DSA:1.10.510.10 (GENE3D); IPR032675 (G3DSA:3.80.10.GENE3D); IPR032675 (G3DSA:3.80.10.GENE3D); mobidb-lite (MOBIDB_LITE); mobidb-lite (MOBIDB_LITE); mobidb-lite (MOBIDB_LITE); mobidb-lite (MOBIDB_LITE); PTHR44329 (PANTHER); IPR017441 (PROSITE_PATTERNS); IPR008271 (PROSITE_PATTERNS); IPR000719 (PROSITE_PROFILES); c…	F:GO:0004672; F:GO:0005524; P:GO:0006468	F:protein kinase activity; F:ATP binding; P:protein phosphorylation	Q8S9K4	1.79431e-60	102541	4.23905e-57	136834	2.68802e-166	PRW57888.1	PRW57888.1 water chloroplastic isoform B [Chlorella sorokiniana]	3076	3.1e-93	12.287	31.6034	4.68193	2.27674	3.45631	6.51718	-2.26016	0.00160906	-1.65763	0.0218246	NA	NA
3	OG0000003	48	16	1	g43	719	Q9C9U5	SIS8_ARATH Probable serine/threonine-protein kinase SIS8 OS=Arabidopsis thaliana OX=3702 GN=SIS8 PE=1 SV=1	2.68749e-55	50.28	7	C:GO:0016020; C:GO:0016021; C:GO:0019012; C:GO:0030430; C:GO:0033644; C:GO:0044165; C:GO:0044167	C:membrane; C:integral component of membrane; C:virion; C:host cell cytoplasm; C:host cell membrane; C:host cell endoplasmic reticulum; C:host cell endoplasmic reticulum membrane	IPR000719 (SMART); G3DSA:1.10.510.10 (GENE3D); IPR001245 (PFAM); mobidb-lite (MOBIDB_LITE); PTHR44329:SF47 (PANTHER); PTHR44329 (PANTHER); IPR017441 (PROSITE_PATTERNS); IPR008271 (PROSITE_PATTERNS); IPR000719 (PROSITE_PROFILES); cd13999 (CDD); IPR011009 (SUPERFAMILY)	F:GO:0004672; F:GO:0005524; P:GO:0006468	F:protein kinase activity; F:ATP binding; P:protein phosphorylation	Q9C9U5	1.48644e-56	102541	9.38567e-51	133720	2.42992e-91	PRW32673.1	PRW32673.1 Serine threonine- kinase CTR1 [Chlorella sorokiniana]	3076	1.8e-88	37.629	32.0423	80.013	106.337	55.589	44.7988	1.91742	0.00011261	1.02701	0.0472535	NA	NA
NA	OG0000003	48	16	1	g5103	316	Q05609	CTR1_ARATH Serine/threonine-protein kinase CTR1 OS=Arabidopsis thaliana OX=3702 GN=CTR1 PE=1 SV=1	3.96462e-55	54.34	NA	NA	NA	IPR001245 (PRINTS); IPR000719 (SMART); PIRSF000654 (PIRSF); G3DSA:3.30.200.20 (GENE3D); G3DSA:1.10.510.10 (GENE3D); IPR001245 (PFAM); PTHR44329 (PANTHER); IPR008271 (PROSITE_PATTERNS); IPR017441 (PROSITE_PATTERNS); IPR000719 (PROSITE_PROFILES); cd13999 (CDD); IPR011009 (SUPERFAMILY)	F:GO:0004672; F:GO:0005524; P:GO:0006468	F:protein kinase activity; F:ATP binding; P:protein phosphorylation	F4IAN2	3.87229e-58	102541	2.58319e-57	133720	0	XP_005847536.1	XP_005847536.1 hypothetical protein CHLNCDRAFT_133720 [Chlorella variabilis]<>EFN55434.1 hypothetical protein CHLNCDRAFT_133720 [Chlorella variabilis]	554065	2.7e-177	43.5532	44.8202	34.5743	29.9993	20.3058	26.1235	NA	NA	NA	NA	NA	NA
NA	OG0000003	48	16	1	g5105	792	Q9C9U5	SIS8_ARATH Probable serine/threonine-protein kinase SIS8 OS=Arabidopsis thaliana OX=3702 GN=SIS8 PE=1 SV=1	1.11645e-52	51.68	7	C:GO:0016020; C:GO:0016021; C:GO:0019012; C:GO:0030430; C:GO:0033644; C:GO:0044165; C:GO:0044167	C:membrane; C:integral component of membrane; C:virion; C:host cell cytoplasm; C:host cell membrane; C:host cell endoplasmic reticulum; C:host cell endoplasmic reticulum membrane	IPR001245 (PRINTS); IPR002110 (SMART); IPR000719 (SMART); IPR036770 (G3DSA:1.25.40.GENE3D); G3DSA:1.10.510.10 (GENE3D); G3DSA:3.30.200.20 (GENE3D); IPR001245 (PFAM); IPR020683 (PFAM); mobidb-lite (MOBIDB_LITE); mobidb-lite (MOBIDB_LITE); mobidb-lite (MOBIDB_LITE); mobidb-lite (MOBIDB_LITE); mobidb-lite (MOBIDB_LITE); mobidb-lite (MOBIDB_LITE); mobidb-lite (MOBIDB_LITE); mobidb-lite (MOBIDB_LITE);…	F:GO:0004672; F:GO:0005515; F:GO:0005524; P:GO:0006468	F:protein kinase activity; F:protein binding; F:ATP binding; P:protein phosphorylation	A0A1I9LPU6	7.38083e-56	102541	7.38023e-52	31062	7.48611e-157	PRW57695.1	PRW57695.1 Serine threonine- kinase CTR1 [Chlorella sorokiniana]	3076	1.1e-147	24.5741	30.0915	9.36386	6.78556	4.22438	15.4988	NA	NA	NA	NA	NA	NA
NA	OG0000003	48	16	1	g5875	967	Q05609	CTR1_ARATH Serine/threonine-protein kinase CTR1 OS=Arabidopsis thaliana OX=3702 GN=CTR1 PE=1 SV=1	7.35088e-55	53.72	NA	NA	NA	IPR000719 (SMART); IPR032675 (G3DSA:3.80.10.GENE3D); IPR001245 (PFAM); IPR032675 (G3DSA:3.80.10.GENE3D); G3DSA:1.10.510.10 (GENE3D); IPR032675 (G3DSA:3.80.10.GENE3D); IPR001611 (PFAM); mobidb-lite (MOBIDB_LITE); mobidb-lite (MOBIDB_LITE); mobidb-lite (MOBIDB_LITE); mobidb-lite (MOBIDB_LITE); PTHR45974:SF12 (PANTHER); PTHR45974 (PANTHER); IPR008271 (PROSITE_PATTERNS); IPR000719 (PROSITE_PROFILES);…	F:GO:0004672; F:GO:0005515; F:GO:0005524; P:GO:0006468	F:protein kinase activity; F:protein binding; F:ATP binding; P:protein phosphorylation	Q8S9K4	3.88275e-60	144672	5.14813e-68	57467	0	XP_005848610.1	XP_005848610.1 hypothetical protein CHLNCDRAFT_57467 [Chlorella variabilis]<>EFN56508.1 hypothetical protein CHLNCDRAFT_57467 [Chlorella variabilis]	554065	1.3e-161	91.1106	78.3256	58.284	34.3296	38.6435	42.1152	NA	NA	NA	NA	NA	NA
NA	OG0000003	48	16	1	g8163	1490	---NA---	---NA---	NA	NA	NA	NA	NA	Coil (COILS); IPR028171 (PFAM); mobidb-lite (MOBIDB_LITE); mobidb-lite (MOBIDB_LITE); mobidb-lite (MOBIDB_LITE); mobidb-lite (MOBIDB_LITE); mobidb-lite (MOBIDB_LITE); mobidb-lite (MOBIDB_LITE); mobidb-lite (MOBIDB_LITE); mobidb-lite (MOBIDB_LITE); mobidb-lite (MOBIDB_LITE); mobidb-lite (MOBIDB_LITE); mobidb-lite (MOBIDB_LITE); mobidb-lite (MOBIDB_LITE); mobidb-lite (MOBIDB_LITE); mobidb-lite (MOB…	no GO terms	no GO terms	---NA---	NA	191740	1.29582e-17	142498	0	XP_005842890.1	XP_005842890.1 hypothetical protein CHLNCDRAFT_142498 [Chlorella variabilis]<>EFN50778.1 hypothetical protein CHLNCDRAFT_142498 [Chlorella variabilis]	554065	0	82.3341	95.7367	104.263	73.8823	158.798	94.4717	NA	NA	NA	NA	NA	NA
NA	OG0000004	53	4	3	g2932	392	---NA---	---NA---	NA	NA	NA	NA	NA	Coil (COILS); Coil (COILS); Coil (COILS); mobidb-lite (MOBIDB_LITE); mobidb-lite (MOBIDB_LITE); mobidb-lite (MOBIDB_LITE); PTHR15654:SF2 (PANTHER); PTHR15654 (PANTHER)	no GO terms	no GO terms	---NA---	NA	154904	8.59696e-17	---NA---	NA	PSC70920.1	PSC70920.1 hypothetical protein C2E20_5673 [Micractinium conductrix]	554055	2.5e-15	4.8819	3.07255	6.18255	3.21421	8.54477	3.28597	NA	NA	NA	NA	NA	NA
1	OG0000004	53	4	3	g5344	507	Q6AWW5	Y5262_ARATH Ankyrin repeat-containing protein At5g02620 OS=Arabidopsis thaliana OX=3702 GN=At5g02620 PE=1 SV=1	2.21838e-08	41.76	NA	NA	NA	IPR002110 (SMART); IPR036770 (G3DSA:1.25.40.GENE3D); IPR002110 (PFAM); IPR036770 (G3DSA:1.25.40.GENE3D); IPR036770 (G3DSA:1.25.40.GENE3D); PTHR24178 (PANTHER); PTHR24178:SF9 (PANTHER); IPR020683 (PROSITE_PROFILES); IPR002110 (PROSITE_PROFILES); IPR020683 (CDD); IPR036770 (SUPERFAMILY)	F:GO:0005515	F:protein binding	Q6AWW5	1.22698e-09	---NA---	NA	137260	0	XP_005845031.1	XP_005845031.1 hypothetical protein CHLNCDRAFT_137260 [Chlorella variabilis]<>EFN52929.1 hypothetical protein CHLNCDRAFT_137260 [Chlorella variabilis]	554065	5.7e-113	27.6458	20.63	7.0229	2.63387	4.80043	4.10747	-1.94035	0.00105035	-1.93613	0.00117968	NA	NA
NA	OG0000004	53	4	3	g6318	241	---NA---	---NA---	NA	NA	NA	NA	NA	no IPS match	no IPS match	no IPS match	---NA---	NA	---NA---	NA	137385	4.80433e-87	XP_005845181.1	XP_005845181.1 hypothetical protein CHLNCDRAFT_137385 [Chlorella variabilis]<>EFN53079.1 hypothetical protein CHLNCDRAFT_137385 [Chlorella variabilis]	554065	9.6e-111	24.6289	25.5558	0.360149	17.4996	0.576052	10.0222	NA	NA	NA	NA	NA	NA
NA	OG0000004	53	4	3	g6384	376	Q92625	ANS1A_HUMAN Ankyrin repeat and SAM domain-containing protein 1A OS=Homo sapiens OX=9606 GN=ANKS1A PE=1 SV=4	1.81719e-14	43.84	NA	NA	NA	IPR002110 (PRINTS); IPR002110 (SMART); IPR036770 (G3DSA:1.25.40.GENE3D); IPR020683 (PFAM); IPR036770 (G3DSA:1.25.40.GENE3D); IPR002110 (PFAM); PTHR24178:SF9 (PANTHER); PTHR24178 (PANTHER); IPR002110 (PROSITE_PROFILES); IPR002110 (PROSITE_PROFILES); IPR020683 (PROSITE_PROFILES); IPR002110 (PROSITE_PROFILES); IPR020683 (CDD); IPR036770 (SUPERFAMILY)	F:GO:0005515	F:protein binding	Q9LVG7	1.12366e-17	123395	9.38162e-17	52864	0	XP_005847189.1	XP_005847189.1 hypothetical protein CHLNCDRAFT_52864 [Chlorella variabilis]<>EFN55087.1 hypothetical protein CHLNCDRAFT_52864 [Chlorella variabilis]	554065	7.9e-128	23.9158	11.0709	8.70359	23.1691	12.5291	9.41979	NA	NA	NA	NA	NA	NA
3	OG0000005	37	15	7	g10011	567	Q75LH6	SPL6_ORYSJ Squamosa promoter-binding-like protein 6 OS=Oryza sativa subsp. japonica OX=39947 GN=SPL6 PE=2 SV=1	1.37787e-14	60.76	NA	NA	NA	Coil (COILS); IPR004333 (PFAM); IPR036893 (G3DSA:4.10.1100.GENE3D); mobidb-lite (MOBIDB_LITE); mobidb-lite (MOBIDB_LITE); mobidb-lite (MOBIDB_LITE); mobidb-lite (MOBIDB_LITE); mobidb-lite (MOBIDB_LITE); PTHR31251:SF1 (PANTHER); PTHR31251 (PANTHER); IPR004333 (PROSITE_PROFILES); IPR036893 (SUPERFAMILY)	F:GO:0003677; C:GO:0005634	F:DNA binding; C:nucleus	Q9SMX9	3.39188e-14	186869	3.60452e-17	139850	0	XP_005843758.1	XP_005843758.1 hypothetical protein CHLNCDRAFT_139850 [Chlorella variabilis]<>EFN51656.1 hypothetical protein CHLNCDRAFT_139850 [Chlorella variabilis]	554065	4.7e-193	162.639	86.9092	145.62	338.787	132.444	217.531	1.50615	0.0383295	NA	NA	NA	NA
3	OG0000005	37	15	7	g10607	273	Q01KM7	SPL8_ORYSI Squamosa promoter-binding-like protein 8 OS=Oryza sativa subsp. indica OX=39946 GN=SPL8 PE=2 SV=1	7.19152e-19	52.85	NA	NA	NA	IPR004333 (PFAM); IPR036893 (G3DSA:4.10.1100.GENE3D); mobidb-lite (MOBIDB_LITE); mobidb-lite (MOBIDB_LITE); mobidb-lite (MOBIDB_LITE); PTHR31251:SF108 (PANTHER); PTHR31251 (PANTHER); IPR004333 (PROSITE_PROFILES); IPR036893 (SUPERFAMILY)	F:GO:0003677; C:GO:0005634	F:DNA binding; C:nucleus	P93015	3.15966e-18	186869	1.02429e-20	54787	3.27282e-28	XP_005844033.1	XP_005844033.1 hypothetical protein CHLNCDRAFT_54787 [Chlorella variabilis]<>EFN51931.1 hypothetical protein CHLNCDRAFT_54787 [Chlorella variabilis]	554065	6.1e-13	0.822793	0.731559	2.46101	1.42854	0.432039	0.876259	1.73183	0.0192727	NA	NA	NA	NA
NA	OG0000005	37	15	7	g1655	851	---NA---	---NA---	NA	NA	NA	NA	NA	IPR036691 (G3DSA:3.60.10.GENE3D); IPR036691 (SUPERFAMILY)	no GO terms	no GO terms	---NA---	NA	---NA---	NA	133755	8.7383e-16	PRW32487.1	PRW32487.1 squamosa promoter-binding 8 [Chlorella sorokiniana]	3076	3.2e-108	167.466	117.976	153.183	140.488	162.831	151.045	NA	NA	NA	NA	NA	NA
3	OG0000005	37	15	7	g1656	291	Q6H509	SPL4_ORYSJ Squamosa promoter-binding-like protein 4 OS=Oryza sativa subsp. japonica OX=39947 GN=SPL4 PE=2 SV=1	5.79945e-16	66.67	NA	NA	NA	IPR004333 (PFAM); IPR036893 (G3DSA:4.10.1100.GENE3D); mobidb-lite (MOBIDB_LITE); mobidb-lite (MOBIDB_LITE); PTHR31251 (PANTHER); IPR004333 (PROSITE_PROFILES); IPR036893 (SUPERFAMILY)	F:GO:0003677; C:GO:0005634	F:DNA binding; C:nucleus	Q9SMX9	1.67702e-16	96716	6.96712e-17	135230	1.05737e-180	XP_005846755.1	XP_005846755.1 hypothetical protein CHLNCDRAFT_135230 [Chlorella variabilis]<>EFN54653.1 hypothetical protein CHLNCDRAFT_135230 [Chlorella variabilis]	554065	4.1e-108	14.7006	10.4857	20.1683	19.5978	14.4013	17.4157	1.12821	0.0250129	NA	NA	NA	NA
NA	OG0000005	37	15	7	g1790	1216	Q9S7A9	SPL4_ARATH Squamosa promoter-binding-like protein 4 OS=Arabidopsis thaliana OX=3702 GN=SPL4 PE=1 SV=1	6.20117e-16	60.87	NA	NA	NA	Coil (COILS); Coil (COILS); Coil (COILS); IPR036893 (G3DSA:4.10.1100.GENE3D); IPR004333 (PFAM); mobidb-lite (MOBIDB_LITE); mobidb-lite (MOBIDB_LITE); mobidb-lite (MOBIDB_LITE); mobidb-lite (MOBIDB_LITE); mobidb-lite (MOBIDB_LITE); mobidb-lite (MOBIDB_LITE); mobidb-lite (MOBIDB_LITE); mobidb-lite (MOBIDB_LITE); mobidb-lite (MOBIDB_LITE); PTHR31251 (PANTHER); PTHR31251:SF108 (PANTHER); IPR004333 (P…	F:GO:0003677; C:GO:0005634	F:DNA binding; C:nucleus	Q9S7A9	3.42983e-17	186869	1.52152e-20	58139	0	XP_005846722.1	XP_005846722.1 hypothetical protein CHLNCDRAFT_58139 [Chlorella variabilis]<>EFN54620.1 hypothetical protein CHLNCDRAFT_58139 [Chlorella variabilis]	554065	0	171.635	96.956	168.189	167.452	131.436	224.541	NA	NA	NA	NA	NA	NA
1	OG0000005	37	15	7	g2083	503	Q7XT42	SPL7_ORYSJ Squamosa promoter-binding-like protein 7 OS=Oryza sativa subsp. japonica OX=39947 GN=SPL7 PE=2 SV=2	3.18076e-18	63.64	NA	NA	NA	IPR004333 (PFAM); IPR036893 (G3DSA:4.10.1100.GENE3D); mobidb-lite (MOBIDB_LITE); mobidb-lite (MOBIDB_LITE); mobidb-lite (MOBIDB_LITE); mobidb-lite (MOBIDB_LITE); mobidb-lite (MOBIDB_LITE); mobidb-lite (MOBIDB_LITE); mobidb-lite (MOBIDB_LITE); mobidb-lite (MOBIDB_LITE); mobidb-lite (MOBIDB_LITE); mobidb-lite (MOBIDB_LITE); PTHR31251:SF112 (PANTHER); PTHR31251 (PANTHER); IPR004333 (PROSITE_PROFILES…	F:GO:0003677; C:GO:0005634	F:DNA binding; C:nucleus	Q9S7A9	1.93674e-19	105679	1.32023e-17	145623	2.98479e-121	XP_005848195.1	XP_005848195.1 hypothetical protein CHLNCDRAFT_145623 [Chlorella variabilis]<>EFN56093.1 hypothetical protein CHLNCDRAFT_145623 [Chlorella variabilis]	554065	4.5e-94	221.935	186.694	77.0118	55.8023	70.9024	62.1049	-1.18175	0.0101438	-1.12033	0.0156551	NA	NA
NA	OG0000005	37	15	7	g5073	1030	Q38740	SBP2_ANTMA Squamosa promoter-binding protein 2 OS=Antirrhinum majus OX=4151 GN=SBP2 PE=2 SV=1	8.8456e-15	56.41	NA	NA	NA	Coil (COILS); IPR004333 (PFAM); IPR036893 (G3DSA:4.10.1100.GENE3D); mobidb-lite (MOBIDB_LITE); mobidb-lite (MOBIDB_LITE); mobidb-lite (MOBIDB_LITE); mobidb-lite (MOBIDB_LITE); mobidb-lite (MOBIDB_LITE); mobidb-lite (MOBIDB_LITE); PTHR31251 (PANTHER); PTHR31251:SF71 (PANTHER); IPR004333 (PROSITE_PROFILES); IPR036893 (SUPERFAMILY)	F:GO:0003677; C:GO:0005634	F:DNA binding; C:nucleus	Q9S758	1.58192e-14	405089	2.56282e-18	133755	0	XP_005847715.1	XP_005847715.1 hypothetical protein CHLNCDRAFT_133755 [Chlorella variabilis]<>EFN55613.1 hypothetical protein CHLNCDRAFT_133755 [Chlorella variabilis]	554065	0	141.191	111.88	77.492	80.3107	83.1915	149.512	NA	NA	NA	NA	NA	NA
NA	OG0000005	37	15	7	g5597	337	Q01KM7	SPL8_ORYSI Squamosa promoter-binding-like protein 8 OS=Oryza sativa subsp. indica OX=39946 GN=SPL8 PE=2 SV=1	2.35069e-07	50.47	NA	NA	NA	IPR036893 (G3DSA:4.10.1100.GENE3D); IPR004333 (PFAM); mobidb-lite (MOBIDB_LITE); mobidb-lite (MOBIDB_LITE); mobidb-lite (MOBIDB_LITE); PTHR31251 (PANTHER); IPR004333 (PROSITE_PROFILES); IPR036893 (SUPERFAMILY)	F:GO:0003677; C:GO:0005634	F:DNA binding; C:nucleus	Q94JW8	2.29866e-06	186869	2.26314e-09	141258	0	XP_005843406.1	XP_005843406.1 hypothetical protein CHLNCDRAFT_141258 [Chlorella variabilis]<>EFN51304.1 hypothetical protein CHLNCDRAFT_141258 [Chlorella variabilis]	554065	7e-152	7.13087	4.4869	3.36139	2.49994	2.54423	1.58822	NA	NA	NA	NA	NA	NA
2	OG0000005	37	15	7	g5615	329	Q01KM7	SPL8_ORYSI Squamosa promoter-binding-like protein 8 OS=Oryza sativa subsp. indica OX=39946 GN=SPL8 PE=2 SV=1	9.87681e-09	52.54	NA	NA	NA	IPR036893 (G3DSA:4.10.1100.GENE3D); IPR004333 (PFAM); mobidb-lite (MOBIDB_LITE); mobidb-lite (MOBIDB_LITE); mobidb-lite (MOBIDB_LITE); mobidb-lite (MOBIDB_LITE); mobidb-lite (MOBIDB_LITE); IPR004333 (PROSITE_PROFILES); IPR036893 (SUPERFAMILY)	F:GO:0003677; C:GO:0005634	F:DNA binding; C:nucleus	Q8S9L0	4.8858e-07	186869	9.74104e-09	141274	5.70499e-180	XP_005843350.1	XP_005843350.1 hypothetical protein CHLNCDRAFT_141274 [Chlorella variabilis]<>EFN51248.1 hypothetical protein CHLNCDRAFT_141274 [Chlorella variabilis]	554065	1.9e-109	9.92836	2.53607	15.0062	126.515	59.3333	80.6706	4.12695	0.00440862	3.98643	0.00599069	NA	NA
NA	OG0000005	37	15	7	g5964	861	Q8S9L0	SPL10_ARATH Squamosa promoter-binding-like protein 10 OS=Arabidopsis thaliana OX=3702 GN=SPL10 PE=2 SV=2	2.65534e-25	66.33	NA	NA	NA	IPR036893 (G3DSA:4.10.1100.GENE3D); IPR004333 (PFAM); mobidb-lite (MOBIDB_LITE); mobidb-lite (MOBIDB_LITE); mobidb-lite (MOBIDB_LITE); mobidb-lite (MOBIDB_LITE); mobidb-lite (MOBIDB_LITE); mobidb-lite (MOBIDB_LITE); mobidb-lite (MOBIDB_LITE); mobidb-lite (MOBIDB_LITE); mobidb-lite (MOBIDB_LITE); mobidb-lite (MOBIDB_LITE); mobidb-lite (MOBIDB_LITE); mobidb-lite (MOBIDB_LITE); mobidb-lite (MOBIDB_L…	F:GO:0003677; C:GO:0005634	F:DNA binding; C:nucleus	Q8S9L0	1.46866e-26	115124	4.67906e-32	17960	3.75862e-36	PSC75173.1	PSC75173.1 squamosa promoter binding isoform B [Micractinium conductrix]	554055	1.4e-47	12.0676	3.60902	2.46101	4.06241	2.2562	2.19065	NA	NA	NA	NA	NA	NA
NA	OG0000005	37	15	7	g6469	723	Q9LGU7	SPL1_ORYSJ Squamosa promoter-binding-like protein 1 OS=Oryza sativa subsp. japonica OX=39947 GN=SPL1 PE=2 SV=1	2.42184e-19	40.65	NA	NA	NA	IPR036893 (G3DSA:4.10.1100.GENE3D); IPR004333 (PFAM); mobidb-lite (MOBIDB_LITE); mobidb-lite (MOBIDB_LITE); mobidb-lite (MOBIDB_LITE); mobidb-lite (MOBIDB_LITE); mobidb-lite (MOBIDB_LITE); mobidb-lite (MOBIDB_LITE); PTHR31251:SF108 (PANTHER); PTHR31251 (PANTHER); IPR004333 (PROSITE_PROFILES); IPR036893 (SUPERFAMILY)	F:GO:0003677; C:GO:0005634	F:DNA binding; C:nucleus	Q8S9G8	4.59338e-20	291579	3.03341e-19	133640	0	XP_005851959.1	XP_005851959.1 hypothetical protein CHLNCDRAFT_133640 [Chlorella variabilis]<>EFN59857.1 hypothetical protein CHLNCDRAFT_133640 [Chlorella variabilis]	554065	3.4e-204	36.2029	27.6529	42.1374	38.0349	27.2184	33.2431	NA	NA	NA	NA	NA	NA
3	OG0000005	37	15	7	g8394	941	Q38740	SBP2_ANTMA Squamosa promoter-binding protein 2 OS=Antirrhinum majus OX=4151 GN=SBP2 PE=2 SV=1	1.21114e-20	67.07	NA	NA	NA	Coil (COILS); Coil (COILS); IPR036893 (G3DSA:4.10.1100.GENE3D); IPR004333 (PFAM); mobidb-lite (MOBIDB_LITE); mobidb-lite (MOBIDB_LITE); mobidb-lite (MOBIDB_LITE); mobidb-lite (MOBIDB_LITE); mobidb-lite (MOBIDB_LITE); mobidb-lite (MOBIDB_LITE); mobidb-lite (MOBIDB_LITE); mobidb-lite (MOBIDB_LITE); mobidb-lite (MOBIDB_LITE); PTHR31251:SF108 (PANTHER); PTHR31251 (PANTHER); IPR004333 (PROSITE_PROFILE…	F:GO:0003677; C:GO:0005634	F:DNA binding; C:nucleus	Q700W2	1.64017e-21	115124	4.73981e-26	136650	0	XP_005845530.1	XP_005845530.1 hypothetical protein CHLNCDRAFT_136650 [Chlorella variabilis]<>EFN53428.1 hypothetical protein CHLNCDRAFT_136650 [Chlorella variabilis]	554065	8.6e-224	2.46838	1.99959	5.40223	40.9812	4.56041	8.37923	3.98495	0.000680823	NA	NA	NA	NA
NA	OG0000005	37	15	7	g840	477	Q01KM7	SPL8_ORYSI Squamosa promoter-binding-like protein 8 OS=Oryza sativa subsp. indica OX=39946 GN=SPL8 PE=2 SV=1	1.16773e-11	50	NA	NA	NA	IPR004333 (PFAM); IPR036893 (G3DSA:4.10.1100.GENE3D); mobidb-lite (MOBIDB_LITE); mobidb-lite (MOBIDB_LITE); mobidb-lite (MOBIDB_LITE); mobidb-lite (MOBIDB_LITE); mobidb-lite (MOBIDB_LITE); mobidb-lite (MOBIDB_LITE); PTHR31251:SF108 (PANTHER); PTHR31251 (PANTHER); IPR004333 (PROSITE_PROFILES); IPR036893 (SUPERFAMILY)	F:GO:0003677; C:GO:0005634	F:DNA binding; C:nucleus	P93015	1.06865e-12	186869	5.67383e-14	54787	0	XP_005844033.1	XP_005844033.1 hypothetical protein CHLNCDRAFT_54787 [Chlorella variabilis]<>EFN51931.1 hypothetical protein CHLNCDRAFT_54787 [Chlorella variabilis]	554065	6.4e-183	0	0.292624	0	0	0.192017	0	NA	NA	NA	NA	NA	NA
NA	OG0000005	37	15	7	g841	507	Q6H509	SPL4_ORYSJ Squamosa promoter-binding-like protein 4 OS=Oryza sativa subsp. japonica OX=39947 GN=SPL4 PE=2 SV=1	2.11755e-16	64.86	NA	NA	NA	IPR004333 (PFAM); IPR036893 (G3DSA:4.10.1100.GENE3D); mobidb-lite (MOBIDB_LITE); mobidb-lite (MOBIDB_LITE); mobidb-lite (MOBIDB_LITE); mobidb-lite (MOBIDB_LITE); mobidb-lite (MOBIDB_LITE); mobidb-lite (MOBIDB_LITE); mobidb-lite (MOBIDB_LITE); mobidb-lite (MOBIDB_LITE); mobidb-lite (MOBIDB_LITE); PTHR31251 (PANTHER); PTHR31251:SF108 (PANTHER); IPR004333 (PROSITE_PROFILES); IPR036893 (SUPERFAMILY)	F:GO:0003677; C:GO:0005634	F:DNA binding; C:nucleus	Q8GXL3	1.55675e-17	186869	2.00683e-18	27387	1.72001e-31	XP_005844034.1	XP_005844034.1 hypothetical protein CHLNCDRAFT_27387, partial [Chlorella variabilis]<>EFN51932.1 hypothetical protein CHLNCDRAFT_27387, partial [Chlorella variabilis]	554065	3.9e-21	0	0.146312	0	0.0446419	0.144013	0	NA	NA	NA	NA	NA	NA
NA	OG0000005	37	15	7	g9541	287	Q75LH6	SPL6_ORYSJ Squamosa promoter-binding-like protein 6 OS=Oryza sativa subsp. japonica OX=39947 GN=SPL6 PE=2 SV=1	2.56418e-15	56.44	NA	NA	NA	IPR036893 (G3DSA:4.10.1100.GENE3D); IPR004333 (PFAM); mobidb-lite (MOBIDB_LITE); mobidb-lite (MOBIDB_LITE); mobidb-lite (MOBIDB_LITE); PTHR31251 (PANTHER); PTHR31251:SF1 (PANTHER); IPR004333 (PROSITE_PROFILES); IPR036893 (SUPERFAMILY)	F:GO:0003677; C:GO:0005634	F:DNA binding; C:nucleus	Q9S7P5	7.21094e-16	414856	2.26115e-16	141047	1.35518e-27	PRW61318.1	PRW61318.1 squamosa promoter binding [Chlorella sorokiniana]	3076	6.9e-23	4.38823	1.99959	2.52104	4.3749	1.44013	2.24541	NA	NA	NA	NA	NA	NA
NA	OG0000006	46	11	0	g11	119	---NA---	---NA---	NA	NA	NA	NA	NA	mobidb-lite (MOBIDB_LITE)	no GO terms	no GO terms	---NA---	NA	---NA---	NA	141590	2.21283e-12	PRW60597.1	PRW60597.1 ABC transporter ATP-binding [Chlorella sorokiniana]	3076	1.1e-09	1.31647	0.926641	0.540223	1.02676	0.816073	0.931026	NA	NA	NA	NA	NA	NA
1	OG0000006	46	11	0	g11162	472	---NA---	---NA---	NA	NA	NA	NA	NA	IPR002893 (PFAM); G3DSA:3.30.60.180 (GENE3D); mobidb-lite (MOBIDB_LITE); IPR002893 (PROSITE_PATTERNS); IPR002893 (PROSITE_PROFILES); SSF144232 (SUPERFAMILY)	no GO terms	no GO terms	---NA---	NA	191121	9.42923e-06	133800	0	XP_005847561.1	XP_005847561.1 expressed protein [Chlorella variabilis]<>EFN55459.1 expressed protein [Chlorella variabilis]	554065	4.4e-144	23.7513	20.1423	8.70359	7.94625	5.08846	7.83157	NA	NA	-1.27465	0.0167774	NA	NA
NA	OG0000006	46	11	0	g11164	285	Q9SJA1	UBP19_ARATH Ubiquitin carboxyl-terminal hydrolase 19 OS=Arabidopsis thaliana OX=3702 GN=UBP19 PE=2 SV=2	8.15879e-07	54.39	NA	NA	NA	G3DSA:3.30.60.180 (GENE3D); IPR002893 (PFAM); IPR002893 (PROSITE_PATTERNS); IPR002893 (PROSITE_PROFILES); SSF144232 (SUPERFAMILY)	no GO terms	no GO terms	Q9SJA1	4.51258e-08	420656	3.2918e-08	133802	0	XP_005847562.1	XP_005847562.1 hypothetical protein CHLNCDRAFT_133802 [Chlorella variabilis]<>EFN55460.1 hypothetical protein CHLNCDRAFT_133802 [Chlorella variabilis]	554065	8.3e-146	18.7048	14.6312	7.74319	20.446	9.60086	14.1844	NA	NA	NA	NA	NA	NA
NA	OG0000006	46	11	0	g11173	286	Q5FWU8	ZMY10_XENLA Zinc finger MYND domain-containing protein 10 OS=Xenopus laevis OX=8355 GN=zmynd10 PE=2 SV=1	7.53534e-06	59.57	NA	NA	NA	G3DSA:3.30.60.180 (GENE3D); IPR002893 (PFAM); IPR024119 (PANTHER); IPR002893 (PROSITE_PATTERNS); IPR002893 (PROSITE_PROFILES); SSF144232 (SUPERFAMILY); IPR011990 (SUPERFAMILY)	F:GO:0005515	F:protein binding	Q9SJA1	2.3861e-06	287614	7.04942e-08	133812	5.97167e-175	XP_005847737.1	XP_005847737.1 hypothetical protein CHLNCDRAFT_133812 [Chlorella variabilis]<>EFN55635.1 hypothetical protein CHLNCDRAFT_133812 [Chlorella variabilis]	554065	1.1e-134	4.11396	2.68238	2.22092	0.982121	1.77616	1.04056	NA	NA	NA	NA	NA	NA
NA	OG0000006	46	11	0	g11178	152	Q9SJA1	UBP19_ARATH Ubiquitin carboxyl-terminal hydrolase 19 OS=Arabidopsis thaliana OX=3702 GN=UBP19 PE=2 SV=2	7.65607e-07	57.63	NA	NA	NA	IPR002893 (PFAM); G3DSA:3.30.60.180 (GENE3D); IPR002893 (PROSITE_PROFILES); SSF144232 (SUPERFAMILY)	no GO terms	no GO terms	Q9SJA1	4.23453e-08	287614	1.86334e-07	133818	1.59019e-112	XP_005847569.1	XP_005847569.1 hypothetical protein CHLNCDRAFT_133818 [Chlorella variabilis]<>EFN55467.1 hypothetical protein CHLNCDRAFT_133818 [Chlorella variabilis]	554065	7.7e-82	7.7891	9.31519	5.94245	2.00888	4.22438	2.57401	NA	NA	NA	NA	NA	NA
NA	OG0000006	46	11	0	g1409	377	---NA---	---NA---	NA	NA	NA	NA	NA	Coil (COILS); Coil (COILS); IPR002893 (PFAM); G3DSA:3.30.60.180 (GENE3D); IPR002893 (PROSITE_PATTERNS); IPR002893 (PROSITE_PROFILES); SSF144232 (SUPERFAMILY)	no GO terms	no GO terms	Q9SJA1	7.56974e-07	294916	4.63314e-07	142043	0	XP_005850297.1	XP_005850297.1 hypothetical protein CHLNCDRAFT_142043 [Chlorella variabilis]<>EFN58195.1 hypothetical protein CHLNCDRAFT_142043 [Chlorella variabilis]	554065	6.6e-207	1.37132	1.12172	1.56064	0.491061	1.00809	0.602428	NA	NA	NA	NA	NA	NA
NA	OG0000006	46	11	0	g1615	252	---NA---	---NA---	NA	NA	NA	NA	NA	IPR002893 (PFAM); G3DSA:3.30.60.180 (GENE3D); mobidb-lite (MOBIDB_LITE); mobidb-lite (MOBIDB_LITE); IPR002893 (PROSITE_PROFILES); SSF144232 (SUPERFAMILY)	no GO terms	no GO terms	---NA---	NA	---NA---	NA	52952	2.63294e-141	XP_005846598.1	XP_005846598.1 hypothetical protein CHLNCDRAFT_52952 [Chlorella variabilis]<>EFN54496.1 hypothetical protein CHLNCDRAFT_52952 [Chlorella variabilis]	554065	2.4e-88	0	0.0975412	0.0600248	0	0.0480043	0	NA	NA	NA	NA	NA	NA
NA	OG0000006	46	11	0	g2422	456	---NA---	---NA---	NA	NA	NA	NA	NA	IPR002893 (PFAM); G3DSA:3.30.60.180 (GENE3D); mobidb-lite (MOBIDB_LITE); mobidb-lite (MOBIDB_LITE); SSF144232 (SUPERFAMILY)	no GO terms	no GO terms	---NA---	NA	---NA---	NA	141590	0	XP_005843064.1	XP_005843064.1 hypothetical protein CHLNCDRAFT_141590 [Chlorella variabilis]<>EFN50962.1 hypothetical protein CHLNCDRAFT_141590 [Chlorella variabilis]	554065	2e-218	53.2073	44.7714	53.6621	48.5257	87.2718	49.1801	NA	NA	NA	NA	NA	NA
NA	OG0000006	46	11	0	g3731	324	Q5FWU8	ZMY10_XENLA Zinc finger MYND domain-containing protein 10 OS=Xenopus laevis OX=8355 GN=zmynd10 PE=2 SV=1	6.12299e-07	53.13	NA	NA	NA	IPR002893 (PFAM); G3DSA:3.30.60.180 (GENE3D); mobidb-lite (MOBIDB_LITE); IPR024119 (PANTHER); PTHR10237:SF1 (PANTHER); IPR002893 (PROSITE_PATTERNS); IPR002893 (PROSITE_PROFILES); SSF144232 (SUPERFAMILY)	no GO terms	no GO terms	---NA---	NA	321438	3.09652e-07	140956	2.24598e-15	PRW56598.1	PRW56598.1 MYND finger [Chlorella sorokiniana]	3076	9.2e-24	0.329117	0.243853	0.420173	0.0892837	0.384034	0.273831	NA	NA	NA	NA	NA	NA
1	OG0000006	46	11	0	g8207	272	---NA---	---NA---	NA	NA	NA	NA	NA	IPR011990 (G3DSA:1.25.40.GENE3D); IPR002893 (PFAM); G3DSA:3.30.60.180 (GENE3D); IPR024119 (PANTHER); IPR002893 (PROSITE_PATTERNS); IPR002893 (PROSITE_PROFILES); IPR011990 (SUPERFAMILY); SSF144232 (SUPERFAMILY)	F:GO:0005515	F:protein binding	Q7XJS0	2.76332e-06	206145	3.6354e-06	55450	0	XP_005843090.1	XP_005843090.1 hypothetical protein CHLNCDRAFT_55450 [Chlorella variabilis]<>XP_005845788.1 hypothetical protein CHLNCDRAFT_53614 [Chlorella variabilis]<>EFN50988.1 hypothetical protein CHLNCDRAFT_55450 [Chlorella variabilis]<>EFN53686.1 hypothetical protein CHLNCDRAFT_53614 [Chlorella variabilis]	554065	5.5e-147	14.0423	15.8504	2.10087	0.848195	0.864078	1.15009	-2.95373	2.43934e-06	-3.39631	1.33508e-07	NA	NA
3	OG0000006	46	11	0	g8843	177	---NA---	---NA---	NA	NA	NA	NA	NA	IPR002893 (PFAM); G3DSA:3.30.60.180 (GENE3D); IPR002893 (PROSITE_PATTERNS); IPR002893 (PROSITE_PROFILES); SSF144232 (SUPERFAMILY)	no GO terms	no GO terms	Q9SB51	2.55801e-06	292767	4.37564e-08	144433	8.31853e-102	XP_005848739.1	XP_005848739.1 hypothetical protein CHLNCDRAFT_144433 [Chlorella variabilis]<>EFN56637.1 hypothetical protein CHLNCDRAFT_144433 [Chlorella variabilis]	554065	1.2e-54	30.3885	20.1423	40.3967	55.9363	47.6683	34.7765	1.4344	0.00862038	1.20952	0.0293348	NA	NA
1	OG0000007	22	11	0	g11562	559	---NA---	---NA---	NA	NA	NA	NA	NA	G3DSA:3.30.60.180 (GENE3D); IPR002893 (PFAM); IPR002893 (PROSITE_PROFILES); SSF144232 (SUPERFAMILY)	no GO terms	no GO terms	---NA---	NA	398009	8.61437e-07	138631	0	XP_005844773.1	XP_005844773.1 hypothetical protein CHLNCDRAFT_138631 [Chlorella variabilis]<>EFN52671.1 hypothetical protein CHLNCDRAFT_138631 [Chlorella variabilis]	554065	6.7e-200	20.3504	19.0693	3.96163	3.08029	2.49622	5.36709	-2.03726	0.000557149	-1.84214	0.00195913	NA	NA
NA	OG0000007	22	11	0	g1747	913	---NA---	---NA---	NA	NA	NA	NA	NA	Coil (COILS); IPR002893 (PFAM); G3DSA:3.30.60.180 (GENE3D); IPR002893 (PROSITE_PROFILES); SSF144232 (SUPERFAMILY)	no GO terms	no GO terms	Q7XJS0	2.4452e-06	398009	8.51413e-08	141150	0	XP_005843474.1	XP_005843474.1 hypothetical protein CHLNCDRAFT_141150 [Chlorella variabilis]<>EFN51372.1 hypothetical protein CHLNCDRAFT_141150 [Chlorella variabilis]	554065	0	48.6545	51.2579	36.375	34.285	26.7384	35.5433	NA	NA	NA	NA	NA	NA
1	OG0000007	22	11	0	g1751	931	---NA---	---NA---	NA	NA	NA	NA	NA	Coil (COILS); G3DSA:3.30.60.180 (GENE3D); IPR002893 (PFAM); mobidb-lite (MOBIDB_LITE); IPR002893 (PROSITE_PROFILES); SSF144232 (SUPERFAMILY)	no GO terms	no GO terms	Q7XJS0	2.22068e-06	398009	1.22616e-07	141146	0	XP_005843443.1	XP_005843443.1 hypothetical protein CHLNCDRAFT_141146 [Chlorella variabilis]<>EFN51341.1 hypothetical protein CHLNCDRAFT_141146 [Chlorella variabilis]	554065	0	206.027	128.218	100.001	51.5167	36.0032	49.7277	NA	NA	-1.46959	0.00462784	NA	NA
NA	OG0000007	22	11	0	g3372	577	---NA---	---NA---	NA	NA	NA	NA	NA	IPR002893 (PFAM); G3DSA:3.30.60.180 (GENE3D); IPR002893 (PROSITE_PROFILES); SSF144232 (SUPERFAMILY)	no GO terms	no GO terms	---NA---	NA	292767	2.85535e-07	141146	1.43162e-29	PRW60852.1	PRW60852.1 ocs element-binding factor 1-like [Chlorella sorokiniana]	3076	5.8e-29	8.94101	7.51067	4.08168	3.97313	1.53614	5.47662	NA	NA	NA	NA	NA	NA
NA	OG0000007	22	11	0	g6454	723	---NA---	---NA---	NA	NA	NA	NA	NA	Coil (COILS); IPR002893 (PFAM); G3DSA:3.30.60.180 (GENE3D); IPR002893 (PROSITE_PROFILES); SSF144232 (SUPERFAMILY)	no GO terms	no GO terms	---NA---	NA	398009	5.05249e-07	133630	1.52185e-175	XP_005851953.1	XP_005851953.1 hypothetical protein CHLNCDRAFT_133630 [Chlorella variabilis]<>EFN59851.1 hypothetical protein CHLNCDRAFT_133630 [Chlorella variabilis]	554065	4.4e-292	81.7307	65.2063	64.5866	68.6145	42.3878	38.2816	NA	NA	NA	NA	NA	NA
3	OG0000007	22	11	0	g6487	462	---NA---	---NA---	NA	NA	NA	NA	NA	G3DSA:3.30.60.180 (GENE3D); IPR002893 (PFAM); IPR002893 (PROSITE_PROFILES); SSF144232 (SUPERFAMILY)	no GO terms	no GO terms	---NA---	NA	---NA---	NA	133659	1.42521e-58	XP_005852268.1	XP_005852268.1 hypothetical protein CHLNCDRAFT_133659 [Chlorella variabilis]<>EFN60166.1 hypothetical protein CHLNCDRAFT_133659 [Chlorella variabilis]	554065	7.7e-117	22.1605	19.4595	46.8793	81.3375	50.5005	36.7481	2.14509	0.00014166	1.56916	0.00606205	NA	NA
1	OG0000007	22	11	0	g8291	463	---NA---	---NA---	NA	NA	NA	NA	NA	no IPS match	no IPS match	no IPS match	---NA---	NA	---NA---	NA	---NA---	NA	PRW45512.1	PRW45512.1 hypothetical protein C2E21_5976 [Chlorella sorokiniana]	3076	4.5e-56	13.8229	9.36396	6.96287	3.16957	2.16019	3.61457	NA	NA	-1.51509	0.0184062	NA	NA
NA	OG0000007	22	11	0	g8526	472	---NA---	---NA---	NA	NA	NA	NA	NA	G3DSA:3.30.60.180 (GENE3D); IPR002893 (PFAM); mobidb-lite (MOBIDB_LITE); mobidb-lite (MOBIDB_LITE); IPR002893 (PROSITE_PROFILES); SSF144232 (SUPERFAMILY)	no GO terms	no GO terms	---NA---	NA	292767	1.45451e-06	136779	0	XP_005845587.1	XP_005845587.1 hypothetical protein CHLNCDRAFT_136778 [Chlorella variabilis]<>EFN53485.1 hypothetical protein CHLNCDRAFT_136778 [Chlorella variabilis]	554065	4.8e-207	12.7807	10.6808	5.04208	9.46408	6.19256	4.98373	NA	NA	NA	NA	NA	NA
NA	OG0000007	22	11	0	g8527	316	---NA---	---NA---	NA	NA	NA	NA	NA	IPR002893 (PFAM); G3DSA:3.30.60.180 (GENE3D); IPR002893 (PROSITE_PROFILES); SSF144232 (SUPERFAMILY)	no GO terms	no GO terms	---NA---	NA	288998	5.23238e-07	136779	0	XP_005845588.1	XP_005845588.1 hypothetical protein CHLNCDRAFT_136779 [Chlorella variabilis]<>EFN53486.1 hypothetical protein CHLNCDRAFT_136779 [Chlorella variabilis]	554065	3e-144	0.76794	1.6582	0.660272	2.90172	2.2562	0.657195	NA	NA	NA	NA	NA	NA
NA	OG0000007	22	11	0	g8534	1049	---NA---	---NA---	NA	NA	NA	NA	NA	G3DSA:3.30.60.180 (GENE3D); IPR002893 (PFAM); mobidb-lite (MOBIDB_LITE); mobidb-lite (MOBIDB_LITE); PTHR23202 (PANTHER); PTHR23202:SF27 (PANTHER); IPR002893 (PROSITE_PROFILES); SSF144232 (SUPERFAMILY)	no GO terms	no GO terms	---NA---	NA	---NA---	NA	53766	0	XP_005845685.1	XP_005845685.1 hypothetical protein CHLNCDRAFT_53766 [Chlorella variabilis]<>EFN53583.1 hypothetical protein CHLNCDRAFT_53766 [Chlorella variabilis]	554065	0	63.739	39.5042	48.5	21.2495	46.9962	42.9367	NA	NA	NA	NA	NA	NA
4	OG0000007	22	11	0	g8908	941	---NA---	---NA---	NA	NA	NA	NA	NA	G3DSA:3.30.60.180 (GENE3D); IPR002893 (PFAM); IPR002893 (PROSITE_PROFILES); SSF144232 (SUPERFAMILY)	no GO terms	no GO terms	---NA---	NA	398009	1.76408e-06	144367	0	XP_005848711.1	XP_005848711.1 hypothetical protein CHLNCDRAFT_144367 [Chlorella variabilis]<>EFN56609.1 hypothetical protein CHLNCDRAFT_144367 [Chlorella variabilis]	554065	0	35.3801	38.48	44.7184	33.9278	42.2918	59.969	NA	NA	0.958667	0.0395115	NA	NA
NA	OG0000008	20	12	0	g10145	584	---NA---	---NA---	NA	NA	NA	NA	NA	mobidb-lite (MOBIDB_LITE); PTHR34407 (PANTHER); cd00229 (CDD); SSF52266 (SUPERFAMILY)	no GO terms	no GO terms	---NA---	NA	405812	4.86283e-36	138538	1.36209e-113	PRW60753.1	PRW60753.1 Zn2+-binding dehydrogenase [Chlorella sorokiniana]	3076	2.8e-100	27.1522	21.1177	46.5192	13.3479	12.8652	21.1945	NA	NA	NA	NA	NA	NA
1	OG0000008	20	12	0	g1129	564	---NA---	---NA---	NA	NA	NA	NA	NA	IPR036514 (G3DSA:3.40.50.GENE3D); mobidb-lite (MOBIDB_LITE); PTHR34407 (PANTHER); cd00229 (CDD); SSF52266 (SUPERFAMILY)	no GO terms	no GO terms	---NA---	NA	416163	1.13677e-49	142315	0	XP_005850412.1	XP_005850412.1 hypothetical protein CHLNCDRAFT_142315 [Chlorella variabilis]<>EFN58310.1 hypothetical protein CHLNCDRAFT_142315 [Chlorella variabilis]	554065	8.4e-291	47.8865	32.4812	16.6269	11.473	5.32848	14.0201	NA	NA	-1.57126	0.0101832	NA	NA
NA	OG0000008	20	12	0	g1142	548	---NA---	---NA---	NA	NA	NA	NA	NA	PTHR34407 (PANTHER); cd00229 (CDD); SSF52266 (SUPERFAMILY)	no GO terms	no GO terms	---NA---	NA	405812	1.18039e-49	142303	0	XP_005850407.1	XP_005850407.1 expressed protein [Chlorella variabilis]<>EFN58305.1 expressed protein [Chlorella variabilis]	554065	0	44.9793	50.819	24.7902	28.3922	10.705	27.1093	NA	NA	NA	NA	NA	NA
3	OG0000008	20	12	0	g1143	545	---NA---	---NA---	NA	NA	NA	NA	NA	PTHR34407 (PANTHER); cd00229 (CDD); SSF52266 (SUPERFAMILY)	no GO terms	no GO terms	---NA---	NA	405812	3.37511e-55	142302	0	XP_005850406.1	XP_005850406.1 hypothetical protein CHLNCDRAFT_142302 [Chlorella variabilis]<>EFN58304.1 hypothetical protein CHLNCDRAFT_142302 [Chlorella variabilis]	554065	1.5e-276	7.62454	11.4123	21.6089	15.7586	7.29666	13.2534	1.40818	0.0122238	NA	NA	NA	NA
3	OG0000008	20	12	0	g4177	505	---NA---	---NA---	NA	NA	NA	NA	NA	IPR036514 (G3DSA:3.40.50.GENE3D); PTHR34407 (PANTHER); cd00229 (CDD); SSF52266 (SUPERFAMILY)	no GO terms	no GO terms	---NA---	NA	405812	6.37323e-43	134328	0	XP_005847434.1	XP_005847434.1 hypothetical protein CHLNCDRAFT_134328 [Chlorella variabilis]<>EFN55332.1 hypothetical protein CHLNCDRAFT_134328 [Chlorella variabilis]	554065	2.4e-244	3.29117	1.51189	194.6	88.5248	84.7276	134.67	6.28044	1.21546e-21	6.00585	3.05421e-20	NA	NA
NA	OG0000008	20	12	0	g4194	598	---NA---	---NA---	NA	NA	NA	NA	NA	PTHR34407 (PANTHER); cd00229 (CDD); SSF52266 (SUPERFAMILY)	no GO terms	no GO terms	---NA---	NA	416163	5.47283e-51	134345	0	XP_005847441.1	XP_005847441.1 hypothetical protein CHLNCDRAFT_134345 [Chlorella variabilis]<>EFN55339.1 hypothetical protein CHLNCDRAFT_134345 [Chlorella variabilis]	554065	0	1246.91	1437.07	900.431	623.915	947.269	486.433	NA	NA	NA	NA	NA	NA
3	OG0000008	20	12	0	g5984	665	---NA---	---NA---	NA	NA	NA	NA	NA	mobidb-lite (MOBIDB_LITE); mobidb-lite (MOBIDB_LITE); PTHR34407 (PANTHER); cd00229 (CDD); SSF52266 (SUPERFAMILY)	no GO terms	no GO terms	---NA---	NA	405812	3.17642e-49	57785	0	XP_005847999.1	XP_005847999.1 expressed protein [Chlorella variabilis]<>EFN55897.1 expressed protein [Chlorella variabilis]	554065	2e-206	26.3842	19.2156	39.3162	108.167	20.5458	45.675	2.25322	0.00331949	NA	NA	NA	NA
NA	OG0000008	20	12	0	g6245	562	---NA---	---NA---	NA	NA	NA	NA	NA	mobidb-lite (MOBIDB_LITE); mobidb-lite (MOBIDB_LITE); mobidb-lite (MOBIDB_LITE); PTHR34407 (PANTHER); cd00229 (CDD); SSF52266 (SUPERFAMILY)	no GO terms	no GO terms	---NA---	NA	405812	1.42698e-44	140796	0	XP_005850707.1	XP_005850707.1 hypothetical protein CHLNCDRAFT_140796 [Chlorella variabilis]<>EFN58605.1 hypothetical protein CHLNCDRAFT_140796 [Chlorella variabilis]	554065	6.4e-267	28.3589	36.2366	14.1058	13.3926	6.86462	16.7037	NA	NA	NA	NA	NA	NA
3	OG0000008	20	12	0	g6554	458	---NA---	---NA---	NA	NA	NA	NA	NA	IPR036514 (G3DSA:3.40.50.GENE3D); PTHR34407 (PANTHER); cd00229 (CDD); SSF52266 (SUPERFAMILY)	no GO terms	no GO terms	---NA---	NA	416163	1.57336e-47	139515	0	XP_005844096.1	XP_005844096.1 hypothetical protein CHLNCDRAFT_139515 [Chlorella variabilis]<>EFN51994.1 hypothetical protein CHLNCDRAFT_139515 [Chlorella variabilis]	554065	1.5e-242	0.713087	0.975412	6.12252	2.85708	2.44822	2.13588	2.79063	3.967e-05	1.92394	0.00621268	NA	NA
NA	OG0000008	20	12	0	g7962	563	---NA---	---NA---	NA	NA	NA	NA	NA	PTHR34407 (PANTHER); cd00229 (CDD); SSF52266 (SUPERFAMILY)	no GO terms	no GO terms	---NA---	NA	416163	6.59293e-50	56786	0	PSC76523.1	PSC76523.1 Beta-glucan synthesis-associated SKN1 [Micractinium conductrix]	554055	1.1e-229	33.0214	28.3845	42.3775	44.2401	23.3301	53.7804	NA	NA	NA	NA	NA	NA
3	OG0000008	20	12	0	g9044	476	---NA---	---NA---	NA	NA	NA	NA	NA	mobidb-lite (MOBIDB_LITE); PTHR34407 (PANTHER); cd00229 (CDD); SSF52266 (SUPERFAMILY)	no GO terms	no GO terms	---NA---	NA	405812	4.71763e-40	133395	0	XP_005852188.1	XP_005852188.1 hypothetical protein CHLNCDRAFT_133395 [Chlorella variabilis]<>EFN60086.1 hypothetical protein CHLNCDRAFT_133395 [Chlorella variabilis]	554065	4.5e-245	1.9747	1.36558	7.56312	1.87496	2.92826	2.30018	1.84461	0.0197531	NA	NA	NA	NA
1	OG0000008	20	12	0	g9387	434	---NA---	---NA---	NA	NA	NA	NA	NA	IPR013830 (PFAM); PTHR34407 (PANTHER); cd00229 (CDD); SSF52266 (SUPERFAMILY)	no GO terms	no GO terms	---NA---	NA	405812	1.53298e-28	133040	0	XP_005852056.1	XP_005852056.1 hypothetical protein CHLNCDRAFT_133040 [Chlorella variabilis]<>EFN59954.1 hypothetical protein CHLNCDRAFT_133040 [Chlorella variabilis]	554065	6.3e-230	66.8656	38.0898	22.8694	7.23198	11.137	19.0586	-1.43319	0.0268951	-1.30669	0.0461127	NA	NA
3	OG0000009	3	26	1	g10249	143	---NA---	---NA---	NA	NA	NA	NA	NA	no IPS match	no IPS match	no IPS match	---NA---	NA	---NA---	NA	134614	1.26031e-53	XP_005842724.1	XP_005842724.1 expressed protein, partial [Chlorella variabilis]<>EFN50599.1 expressed protein, partial [Chlorella variabilis]	554065	1.3e-38	0.109706	0.926641	3.90161	2.58923	1.34412	1.58822	3.03069	0.000734628	1.94979	0.0363186	NA	NA
3	OG0000009	3	26	1	g10367	700	Q6ZNG9	KRBA2_HUMAN KRAB-A domain-containing protein 2 OS=Homo sapiens OX=9606 GN=KRBA2 PE=1 SV=1	2.93461e-18	46.88	NA	NA	NA	Coil (COILS); IPR001584 (PFAM); IPR036397 (G3DSA:3.30.420.GENE3D); mobidb-lite (MOBIDB_LITE); mobidb-lite (MOBIDB_LITE); mobidb-lite (MOBIDB_LITE); mobidb-lite (MOBIDB_LITE); PTHR45935 (PANTHER); PTHR45935:SF7 (PANTHER); IPR001584 (PROSITE_PROFILES); IPR012337 (SUPERFAMILY)	F:GO:0003676; P:GO:0015074	F:nucleic acid binding; P:DNA integration	Q9ZT94	3.00604e-09	---NA---	NA	56488	0	XP_005849864.1	XP_005849864.1 expressed protein [Chlorella variabilis]<>EFN57762.1 expressed protein [Chlorella variabilis]	554065	1.4e-231	2.02955	1.90205	6.90285	3.21421	2.54423	3.23121	1.757	0.00547803	NA	NA	NA	NA
NA	OG0000009	3	26	1	g10648	139	---NA---	---NA---	NA	NA	NA	NA	NA	no IPS match	no IPS match	no IPS match	---NA---	NA	---NA---	NA	134614	3.35283e-54	XP_005842724.1	XP_005842724.1 expressed protein, partial [Chlorella variabilis]<>EFN50599.1 expressed protein, partial [Chlorella variabilis]	554065	9.6e-39	0	0	0.0600248	0	0.0480043	0	NA	NA	NA	NA	NA	NA
3	OG0000009	3	26	1	g10709	365	Q6ZNG9	KRBA2_HUMAN KRAB-A domain-containing protein 2 OS=Homo sapiens OX=9606 GN=KRBA2 PE=1 SV=1	5.25052e-19	49.37	NA	NA	NA	IPR036397 (G3DSA:3.30.420.GENE3D); IPR001584 (PFAM); PTHR45935:SF7 (PANTHER); PTHR45935 (PANTHER); IPR001584 (PROSITE_PROFILES); IPR012337 (SUPERFAMILY)	F:GO:0003676; P:GO:0015074	F:nucleic acid binding; P:DNA integration	Q9ZT94	3.47652e-08	---NA---	NA	57281	4.11267e-118	XP_005849864.1	XP_005849864.1 expressed protein [Chlorella variabilis]<>EFN57762.1 expressed protein [Chlorella variabilis]	554065	1.1e-105	2.74264	2.97501	9.18379	9.15158	2.97627	4.43606	2.14674	0.000190846	NA	NA	NA	NA
NA	OG0000009	3	26	1	g11128	140	---NA---	---NA---	NA	NA	NA	NA	NA	no IPS match	no IPS match	no IPS match	---NA---	NA	---NA---	NA	134614	5.01904e-53	XP_005842724.1	XP_005842724.1 expressed protein, partial [Chlorella variabilis]<>EFN50599.1 expressed protein, partial [Chlorella variabilis]	554065	3.7e-38	0.109706	0.0975412	0.300124	0	0.432039	0.547662	NA	NA	NA	NA	NA	NA
3	OG0000009	3	26	1	g11239	77	---NA---	---NA---	NA	NA	NA	NA	NA	no IPS match	no IPS match	no IPS match	---NA---	NA	---NA---	NA	57281	1.63941e-42	XP_005849864.1	XP_005849864.1 expressed protein [Chlorella variabilis]<>EFN57762.1 expressed protein [Chlorella variabilis]	554065	7.7e-30	0.987351	1.41435	7.14295	3.48207	3.98436	3.12167	2.5328	0.000109229	2.05263	0.00213153	NA	NA
NA	OG0000009	3	26	1	g11381	173	---NA---	---NA---	NA	NA	NA	NA	NA	no IPS match	no IPS match	no IPS match	---NA---	NA	---NA---	NA	134614	3.53111e-53	XP_005842724.1	XP_005842724.1 expressed protein, partial [Chlorella variabilis]<>EFN50599.1 expressed protein, partial [Chlorella variabilis]	554065	7.8e-38	16.8947	20.4837	22.2092	20.8478	21.746	17.9086	NA	NA	NA	NA	NA	NA
3	OG0000009	3	26	1	g1157	992	Q8S9J0	TAUE4_ARATH Sulfite exporter TauE/SafE family protein 4 OS=Arabidopsis thaliana OX=3702 GN=At2g36630 PE=2 SV=1	8.61468e-18	53.14	NA	NA	NA	Coil (COILS); IPR036397 (G3DSA:3.30.420.GENE3D); IPR002781 (PFAM); IPR001584 (PFAM); mobidb-lite (MOBIDB_LITE); mobidb-lite (MOBIDB_LITE); mobidb-lite (MOBIDB_LITE); mobidb-lite (MOBIDB_LITE); PTHR14255:SF3 (PANTHER); PTHR14255 (PANTHER); IPR001584 (PROSITE_PROFILES); IPR012337 (SUPERFAMILY)	F:GO:0003676; P:GO:0015074; C:GO:0016021	F:nucleic acid binding; P:DNA integration; C:integral component of membrane	Q8S9J0	4.76473e-19	151478	1.33275e-13	50737	0	XP_005850151.1	XP_005850151.1 hypothetical protein CHLNCDRAFT_50737 [Chlorella variabilis]<>EFN58049.1 hypothetical protein CHLNCDRAFT_50737 [Chlorella variabilis]	554065	5.3e-272	30.0045	35.3587	160.446	126.203	140.749	91.5143	2.57782	1.19921e-07	2.33029	1.98816e-06	NA	NA
3	OG0000009	3	26	1	g1245	359	Q6ZNG9	KRBA2_HUMAN KRAB-A domain-containing protein 2 OS=Homo sapiens OX=9606 GN=KRBA2 PE=1 SV=1	5.93831e-19	49.37	NA	NA	NA	IPR036397 (G3DSA:3.30.420.GENE3D); IPR001584 (PFAM); PTHR45935:SF7 (PANTHER); PTHR45935 (PANTHER); IPR001584 (PROSITE_PROFILES); IPR012337 (SUPERFAMILY)	F:GO:0003676; P:GO:0015074	F:nucleic acid binding; P:DNA integration	Q9ZT94	3.74088e-08	---NA---	NA	57281	1.88912e-119	XP_005849864.1	XP_005849864.1 expressed protein [Chlorella variabilis]<>EFN57762.1 expressed protein [Chlorella variabilis]	554065	4.8e-106	3.01691	2.63361	9.24381	11.339	13.1052	3.94317	2.3527	0.00190857	2.10511	0.00582118	NA	NA
2	OG0000009	3	26	1	g1647	545	Q402U7	PRS44_MOUSE Serine protease 44 OS=Mus musculus OX=10090 GN=Prss44 PE=2 SV=1	2.43603e-14	51.88	NA	NA	NA	IPR001254 (SMART); G3DSA:2.40.10.10 (GENE3D); G3DSA:3.50.4.10 (GENE3D); IPR003609 (PFAM); G3DSA:2.40.10.10 (GENE3D); IPR001254 (PFAM); mobidb-lite (MOBIDB_LITE); PTHR24260 (PANTHER); IPR018114 (PROSITE_PATTERNS); IPR033116 (PROSITE_PATTERNS); IPR001254 (PROSITE_PROFILES); IPR009003 (SUPERFAMILY); IPR009003 (SUPERFAMILY)	F:GO:0004252; P:GO:0006508	F:serine-type endopeptidase activity; P:proteolysis	---NA---	NA	---NA---	NA	58154	0	XP_005846610.1	XP_005846610.1 hypothetical protein CHLNCDRAFT_58154 [Chlorella variabilis]<>EFN54508.1 hypothetical protein CHLNCDRAFT_58154 [Chlorella variabilis]	554065	5.5e-154	45.7473	46.3321	136.556	109.685	139.213	94.0336	1.86739	8.16667e-05	1.84252	0.000117858	NA	NA
NA	OG0000009	3	26	1	g2331	135	---NA---	---NA---	NA	NA	NA	NA	NA	no IPS match	no IPS match	no IPS match	---NA---	NA	---NA---	NA	57281	1.44531e-76	XP_005849864.1	XP_005849864.1 expressed protein [Chlorella variabilis]<>EFN57762.1 expressed protein [Chlorella variabilis]	554065	1.6e-51	0.658234	0.390165	0.420173	0.178567	0.624056	0.492896	NA	NA	NA	NA	NA	NA
3	OG0000009	3	26	1	g2570	152	---NA---	---NA---	NA	NA	NA	NA	NA	no IPS match	no IPS match	no IPS match	---NA---	NA	---NA---	NA	134614	2.92986e-54	XP_005842724.1	XP_005842724.1 expressed protein, partial [Chlorella variabilis]<>EFN50599.1 expressed protein, partial [Chlorella variabilis]	554065	3.6e-39	2.74264	2.92624	8.46349	4.91061	5.13646	3.99793	1.65181	0.00481049	NA	NA	NA	NA
2	OG0000009	3	26	1	g2885	404	Q6ZNG9	KRBA2_HUMAN KRAB-A domain-containing protein 2 OS=Homo sapiens OX=9606 GN=KRBA2 PE=1 SV=1	2.32376e-18	49.37	NA	NA	NA	IPR036019 (G3DSA:1.10.1200.GENE3D); IPR001584 (PFAM); IPR036397 (G3DSA:3.30.420.GENE3D); IPR037673 (PFAM); PTHR45935 (PANTHER); PTHR45935:SF7 (PANTHER); IPR001584 (PROSITE_PROFILES); IPR036019 (SUPERFAMILY); IPR012337 (SUPERFAMILY)	F:GO:0003676; P:GO:0015074	F:nucleic acid binding; P:DNA integration	Q9ZT94	2.26679e-08	---NA---	NA	57281	1.2333e-100	XP_005849864.1	XP_005849864.1 expressed protein [Chlorella variabilis]<>EFN57762.1 expressed protein [Chlorella variabilis]	554065	1.3e-88	17.0044	14.68	38.716	64.4629	51.5086	49.892	2.22158	3.48859e-05	2.1749	6.03798e-05	NA	NA
3	OG0000009	3	26	1	g3048	126	---NA---	---NA---	NA	NA	NA	NA	NA	no IPS match	no IPS match	no IPS match	---NA---	NA	---NA---	NA	134614	6.20705e-42	XP_005842724.1	XP_005842724.1 expressed protein, partial [Chlorella variabilis]<>EFN50599.1 expressed protein, partial [Chlorella variabilis]	554065	1.1e-28	0.603381	1.17049	2.70111	2.27674	0.960086	1.25962	1.92155	0.0068711	NA	NA	NA	NA
NA	OG0000009	3	26	1	g452	122	---NA---	---NA---	NA	NA	NA	NA	NA	no IPS match	no IPS match	no IPS match	---NA---	NA	---NA---	NA	134614	3.64971e-38	XP_005842724.1	XP_005842724.1 expressed protein, partial [Chlorella variabilis]<>EFN50599.1 expressed protein, partial [Chlorella variabilis]	554065	2.8e-26	0.877645	0.585247	1.08045	0.71427	0.67206	0.766727	NA	NA	NA	NA	NA	NA
NA	OG0000009	3	26	1	g4627	214	---NA---	---NA---	NA	NA	NA	NA	NA	no IPS match	no IPS match	no IPS match	---NA---	NA	---NA---	NA	134614	3.51642e-120	XP_005842724.1	XP_005842724.1 expressed protein, partial [Chlorella variabilis]<>EFN50599.1 expressed protein, partial [Chlorella variabilis]	554065	4.6e-80	0.219411	0.682788	0.360149	0.401777	0.288026	0.273831	NA	NA	NA	NA	NA	NA
NA	OG0000009	3	26	1	g4684	145	---NA---	---NA---	NA	NA	NA	NA	NA	no IPS match	no IPS match	no IPS match	---NA---	NA	---NA---	NA	134614	5.21962e-53	XP_005842724.1	XP_005842724.1 expressed protein, partial [Chlorella variabilis]<>EFN50599.1 expressed protein, partial [Chlorella variabilis]	554065	3.8e-38	2.41352	2.04837	3.42141	2.09817	2.83225	1.36916	NA	NA	NA	NA	NA	NA
3	OG0000009	3	26	1	g5304	150	---NA---	---NA---	NA	NA	NA	NA	NA	no IPS match	no IPS match	no IPS match	---NA---	NA	---NA---	NA	134614	2.93989e-53	XP_005842724.1	XP_005842724.1 expressed protein, partial [Chlorella variabilis]<>EFN50599.1 expressed protein, partial [Chlorella variabilis]	554065	4e-38	0.164559	0.487706	5.70235	3.21421	2.97627	2.30018	4.13015	6.0617e-08	3.46093	8.46299e-06	NA	NA
3	OG0000009	3	26	1	g6114	653	Q6ZNG9	KRBA2_HUMAN KRAB-A domain-containing protein 2 OS=Homo sapiens OX=9606 GN=KRBA2 PE=1 SV=1	8.31014e-18	45.92	NA	NA	NA	Coil (COILS); IPR003615 (SMART); IPR004919 (PFAM); G3DSA:3.30.40.60 (GENE3D); IPR001584 (PFAM); IPR002711 (PFAM); IPR036397 (G3DSA:3.30.420.GENE3D); PTHR39639:SF2 (PANTHER); PTHR39639 (PANTHER); IPR001584 (PROSITE_PROFILES); IPR003615 (CDD); IPR012337 (SUPERFAMILY)	F:GO:0003676; F:GO:0004519; P:GO:0015074	F:nucleic acid binding; F:endonuclease activity; P:DNA integration	Q9ZT94	2.67621e-08	194231	1.1751e-15	145316	2.68823e-165	XP_005847914.1	XP_005847914.1 hypothetical protein CHLNCDRAFT_145316 [Chlorella variabilis]<>EFN55812.1 hypothetical protein CHLNCDRAFT_145316 [Chlorella variabilis]	554065	4.2e-145	1.42617	1.31681	4.20173	2.36602	1.34412	1.04056	1.66912	0.011488	NA	NA	NA	NA
NA	OG0000009	3	26	1	g7729	300	Q6ZNG9	KRBA2_HUMAN KRAB-A domain-containing protein 2 OS=Homo sapiens OX=9606 GN=KRBA2 PE=1 SV=1	1.28183e-18	49.37	NA	NA	NA	IPR001584 (PFAM); IPR036397 (G3DSA:3.30.420.GENE3D); PTHR45935:SF7 (PANTHER); PTHR45935 (PANTHER); IPR001584 (PROSITE_PROFILES); IPR012337 (SUPERFAMILY)	F:GO:0003676; P:GO:0015074	F:nucleic acid binding; P:DNA integration	Q9ZT94	1.76479e-08	---NA---	NA	57281	2.54745e-96	XP_005849864.1	XP_005849864.1 expressed protein [Chlorella variabilis]<>EFN57762.1 expressed protein [Chlorella variabilis]	554065	4.7e-83	0.274264	0.438935	1.32054	0.223209	0.384034	0.219065	NA	NA	NA	NA	NA	NA
NA	OG0000009	3	26	1	g8231	253	---NA---	---NA---	NA	NA	NA	NA	NA	Coil (COILS); mobidb-lite (MOBIDB_LITE); mobidb-lite (MOBIDB_LITE)	no GO terms	no GO terms	---NA---	NA	---NA---	NA	56488	2.2984e-164	XP_005852086.1	XP_005852086.1 hypothetical protein CHLNCDRAFT_56488 [Chlorella variabilis]<>EFN59984.1 hypothetical protein CHLNCDRAFT_56488 [Chlorella variabilis]	554065	6.4e-89	0	0	0.480198	0.535702	0.33603	0.109532	NA	NA	NA	NA	NA	NA
2	OG0000009	3	26	1	g9040	681	---NA---	---NA---	NA	NA	NA	NA	NA	mobidb-lite (MOBIDB_LITE); mobidb-lite (MOBIDB_LITE); mobidb-lite (MOBIDB_LITE); mobidb-lite (MOBIDB_LITE); mobidb-lite (MOBIDB_LITE); mobidb-lite (MOBIDB_LITE); mobidb-lite (MOBIDB_LITE)	no GO terms	no GO terms	---NA---	NA	---NA---	NA	138230	1.31536e-88	XP_005852086.1	XP_005852086.1 hypothetical protein CHLNCDRAFT_56488 [Chlorella variabilis]<>EFN59984.1 hypothetical protein CHLNCDRAFT_56488 [Chlorella variabilis]	554065	3.5e-65	38.9455	42.7718	155.044	165.666	203.49	117.364	2.4481	3.55929e-06	2.4766	3.45898e-06	NA	NA
NA	OG0000009	3	26	1	g9041	198	P10978	POLX_TOBAC Retrovirus-related Pol polyprotein from transposon TNT 1-94 OS=Nicotiana tabacum OX=4097 PE=2 SV=1	4.10096e-08	50.59	NA	NA	NA	IPR036397 (G3DSA:3.30.420.GENE3D); IPR001584 (PFAM); IPR001584 (PROSITE_PROFILES); IPR012337 (SUPERFAMILY)	F:GO:0003676; P:GO:0015074	F:nucleic acid binding; P:DNA integration	---NA---	NA	---NA---	NA	57281	4.64223e-120	XP_005849864.1	XP_005849864.1 expressed protein [Chlorella variabilis]<>EFN57762.1 expressed protein [Chlorella variabilis]	554065	7e-83	0.0548528	0.0487706	0.180074	0.133926	0	0.109532	NA	NA	NA	NA	NA	NA
NA	OG0000009	3	26	1	g943	230	P10978	POLX_TOBAC Retrovirus-related Pol polyprotein from transposon TNT 1-94 OS=Nicotiana tabacum OX=4097 PE=2 SV=1	2.08814e-09	47.37	NA	NA	NA	IPR001584 (PFAM); IPR036397 (G3DSA:3.30.420.GENE3D); PTHR45935 (PANTHER); PTHR45935:SF7 (PANTHER); IPR001584 (PROSITE_PROFILES); IPR012337 (SUPERFAMILY)	F:GO:0003676; P:GO:0015074	F:nucleic acid binding; P:DNA integration	Q9ZT94	1.11296e-06	---NA---	NA	57281	9.94719e-109	XP_005849864.1	XP_005849864.1 expressed protein [Chlorella variabilis]<>EFN57762.1 expressed protein [Chlorella variabilis]	554065	9.2e-87	0.493676	3.85288	0.840347	0.580344	0.432039	0.383363	NA	NA	NA	NA	NA	NA
NA	OG0000009	3	26	1	g9592	172	P10978	POLX_TOBAC Retrovirus-related Pol polyprotein from transposon TNT 1-94 OS=Nicotiana tabacum OX=4097 PE=2 SV=1	5.89665e-10	47.37	NA	NA	NA	IPR001584 (PFAM); IPR036397 (G3DSA:3.30.420.GENE3D); PTHR45935:SF7 (PANTHER); PTHR45935 (PANTHER); IPR001584 (PROSITE_PROFILES); IPR012337 (SUPERFAMILY)	F:GO:0003676; P:GO:0015074	F:nucleic acid binding; P:DNA integration	Q9ZT94	1.65736e-07	---NA---	NA	57281	6.22362e-86	XP_005849864.1	XP_005849864.1 expressed protein [Chlorella variabilis]<>EFN57762.1 expressed protein [Chlorella variabilis]	554065	2.2e-64	0	0.0975412	0.540223	0.223209	0.0480043	0.164299	NA	NA	NA	NA	NA	NA
NA	OG0000009	3	26	1	g9829	306	Q6ZNG9	KRBA2_HUMAN KRAB-A domain-containing protein 2 OS=Homo sapiens OX=9606 GN=KRBA2 PE=1 SV=1	3.86734e-19	49.37	NA	NA	NA	IPR001584 (PFAM); IPR036397 (G3DSA:3.30.420.GENE3D); PTHR45935 (PANTHER); PTHR45935:SF7 (PANTHER); IPR001584 (PROSITE_PROFILES); IPR012337 (SUPERFAMILY)	F:GO:0003676; P:GO:0015074	F:nucleic acid binding; P:DNA integration	Q9ZT94	2.08895e-08	---NA---	NA	57281	8.69196e-97	XP_005849864.1	XP_005849864.1 expressed protein [Chlorella variabilis]<>EFN57762.1 expressed protein [Chlorella variabilis]	554065	4.4e-84	0.932498	5.46231	3.00124	1.16069	2.2082	0.657195	NA	NA	NA	NA	NA	NA
NA	OG0000010	15	13	0	g10913	325	---NA---	---NA---	NA	NA	NA	NA	NA	IPR002509 (PFAM); G3DSA:3.20.20.370 (GENE3D); mobidb-lite (MOBIDB_LITE); PTHR45985 (PANTHER); IPR011330 (SUPERFAMILY)	F:GO:0003824; P:GO:0005975; F:GO:0016810	F:catalytic activity; P:carbohydrate metabolic process; F:hydrolase activity, acting on carbon-nitrogen (but not peptide) bonds	---NA---	NA	---NA---	NA	145232	0	XP_005847883.1	XP_005847883.1 hypothetical protein CHLNCDRAFT_145232 [Chlorella variabilis]<>EFN55781.1 hypothetical protein CHLNCDRAFT_145232 [Chlorella variabilis]	554065	2.8e-190	24.1352	33.0177	6.90285	27.6333	3.50431	9.09119	NA	NA	NA	NA	NA	NA
2	OG0000010	15	13	0	g2631	116	---NA---	---NA---	NA	NA	NA	NA	NA	G3DSA:3.20.20.370 (GENE3D); PTHR45985 (PANTHER); IPR011330 (SUPERFAMILY)	F:GO:0003824; P:GO:0005975	F:catalytic activity; P:carbohydrate metabolic process	---NA---	NA	---NA---	NA	136061	2.91423e-79	XP_005846123.1	XP_005846123.1 hypothetical protein CHLNCDRAFT_136061 [Chlorella variabilis]<>EFN54021.1 hypothetical protein CHLNCDRAFT_136061 [Chlorella variabilis]	554065	1.8e-59	1.0422	0.926641	6.18255	9.55336	21.5539	6.51718	3.50083	1.97156e-05	4.33741	2.42893e-07	NA	NA
NA	OG0000010	15	13	0	g395	871	---NA---	---NA---	NA	NA	NA	NA	NA	PR01217 (PRINTS); IPR002509 (PFAM); G3DSA:3.20.20.370 (GENE3D); mobidb-lite (MOBIDB_LITE); mobidb-lite (MOBIDB_LITE); mobidb-lite (MOBIDB_LITE); mobidb-lite (MOBIDB_LITE); mobidb-lite (MOBIDB_LITE); mobidb-lite (MOBIDB_LITE); mobidb-lite (MOBIDB_LITE); mobidb-lite (MOBIDB_LITE); PTHR45985 (PANTHER); cd10919 (CDD); IPR011330 (SUPERFAMILY)	F:GO:0003824; P:GO:0005975; F:GO:0016810	F:catalytic activity; P:carbohydrate metabolic process; F:hydrolase activity, acting on carbon-nitrogen (but not peptide) bonds	---NA---	NA	---NA---	NA	138802	0	XP_005844474.1	XP_005844474.1 hypothetical protein CHLNCDRAFT_138802 [Chlorella variabilis]<>EFN52372.1 hypothetical protein CHLNCDRAFT_138802 [Chlorella variabilis]	554065	1.2e-272	89.3004	71.5465	110.085	103.658	88.0879	116.816	NA	NA	NA	NA	NA	NA
1	OG0000010	15	13	0	g396	558	---NA---	---NA---	NA	NA	NA	NA	NA	IPR002509 (PFAM); G3DSA:3.20.20.370 (GENE3D); mobidb-lite (MOBIDB_LITE); mobidb-lite (MOBIDB_LITE); PTHR45985 (PANTHER); PTHR45985:SF3 (PANTHER); cd10919 (CDD); IPR011330 (SUPERFAMILY)	F:GO:0003824; P:GO:0005975; F:GO:0016810	F:catalytic activity; P:carbohydrate metabolic process; F:hydrolase activity, acting on carbon-nitrogen (but not peptide) bonds	---NA---	NA	---NA---	NA	138801	0	XP_005844473.1	XP_005844473.1 hypothetical protein CHLNCDRAFT_138801 [Chlorella variabilis]<>EFN52371.1 hypothetical protein CHLNCDRAFT_138801 [Chlorella variabilis]	554065	1e-211	0.932498	0.634018	0.300124	0.178567	0.144013	0	NA	NA	-2.77269	0.0121337	NA	NA
3	OG0000010	15	13	0	g397	1045	---NA---	---NA---	NA	NA	NA	NA	NA	Coil (COILS); IPR018392 (SMART); IPR002509 (PFAM); G3DSA:3.20.20.370 (GENE3D); IPR036779 (G3DSA:3.10.350.GENE3D); IPR018392 (PFAM); mobidb-lite (MOBIDB_LITE); mobidb-lite (MOBIDB_LITE); mobidb-lite (MOBIDB_LITE); PTHR45985 (PANTHER); PTHR45985:SF3 (PANTHER); IPR018392 (PROSITE_PROFILES); IPR018392 (CDD); cd10919 (CDD); IPR011330 (SUPERFAMILY); SSF54106 (SUPERFAMILY)	F:GO:0003824; P:GO:0005975; F:GO:0016810	F:catalytic activity; P:carbohydrate metabolic process; F:hydrolase activity, acting on carbon-nitrogen (but not peptide) bonds	---NA---	NA	---NA---	NA	54401	0	XP_005844472.1	XP_005844472.1 hypothetical protein CHLNCDRAFT_54401 [Chlorella variabilis]<>EFN52370.1 hypothetical protein CHLNCDRAFT_54401 [Chlorella variabilis]	554065	0	89.081	72.717	107.985	255.664	117.371	103.399	1.71646	0.00824287	NA	NA	NA	NA
3	OG0000010	15	13	0	g399	684	---NA---	---NA---	NA	NA	NA	NA	NA	G3DSA:3.20.20.370 (GENE3D); IPR002509 (PFAM); mobidb-lite (MOBIDB_LITE); mobidb-lite (MOBIDB_LITE); mobidb-lite (MOBIDB_LITE); mobidb-lite (MOBIDB_LITE); mobidb-lite (MOBIDB_LITE); mobidb-lite (MOBIDB_LITE); mobidb-lite (MOBIDB_LITE); mobidb-lite (MOBIDB_LITE); mobidb-lite (MOBIDB_LITE); PTHR45985 (PANTHER); PS51257 (PROSITE_PROFILES); cd10919 (CDD); IPR011330 (SUPERFAMILY)	F:GO:0003824; P:GO:0005975; F:GO:0016810	F:catalytic activity; P:carbohydrate metabolic process; F:hydrolase activity, acting on carbon-nitrogen (but not peptide) bonds	---NA---	NA	---NA---	NA	58845	0	XP_005844471.1	XP_005844471.1 hypothetical protein CHLNCDRAFT_58845 [Chlorella variabilis]<>EFN52369.1 hypothetical protein CHLNCDRAFT_58845 [Chlorella variabilis]	554065	5.4e-300	8.11822	6.38895	35.8348	13.6604	21.89	8.05063	2.15096	0.00201418	1.55704	0.0281636	NA	NA
3	OG0000010	15	13	0	g400	399	---NA---	---NA---	NA	NA	NA	NA	NA	IPR002509 (PFAM); G3DSA:3.20.20.370 (GENE3D); mobidb-lite (MOBIDB_LITE); mobidb-lite (MOBIDB_LITE); mobidb-lite (MOBIDB_LITE); PTHR45985 (PANTHER); cd10919 (CDD); IPR011330 (SUPERFAMILY)	F:GO:0003824; P:GO:0005975; F:GO:0016810	F:catalytic activity; P:carbohydrate metabolic process; F:hydrolase activity, acting on carbon-nitrogen (but not peptide) bonds	---NA---	NA	---NA---	NA	138797	0	XP_005844470.1	XP_005844470.1 hypothetical protein CHLNCDRAFT_138797 [Chlorella variabilis]<>EFN52368.1 hypothetical protein CHLNCDRAFT_138797 [Chlorella variabilis]	554065	4.4e-185	45.7473	37.9923	79.7129	492.891	46.2282	65.6647	3.37849	0.0013269	NA	NA	NA	NA
NA	OG0000010	15	13	0	g401	441	---NA---	---NA---	NA	NA	NA	NA	NA	G3DSA:3.20.20.370 (GENE3D); IPR002509 (PFAM); mobidb-lite (MOBIDB_LITE); mobidb-lite (MOBIDB_LITE); PTHR45985:SF3 (PANTHER); PTHR45985 (PANTHER); IPR011330 (SUPERFAMILY)	F:GO:0003824; P:GO:0005975; F:GO:0016810	F:catalytic activity; P:carbohydrate metabolic process; F:hydrolase activity, acting on carbon-nitrogen (but not peptide) bonds	---NA---	NA	---NA---	NA	138796	0	XP_005844469.1	XP_005844469.1 hypothetical protein CHLNCDRAFT_138796 [Chlorella variabilis]<>EFN52367.1 hypothetical protein CHLNCDRAFT_138796 [Chlorella variabilis]	554065	2.1e-204	68.6758	36.8218	7.62314	34.285	4.99245	33.736	NA	NA	NA	NA	NA	NA
3	OG0000010	15	13	0	g5728	396	---NA---	---NA---	NA	NA	NA	NA	NA	G3DSA:3.20.20.370 (GENE3D); IPR002509 (PFAM); mobidb-lite (MOBIDB_LITE); mobidb-lite (MOBIDB_LITE); PTHR45985 (PANTHER); cd10919 (CDD); IPR011330 (SUPERFAMILY)	F:GO:0003824; P:GO:0005975; F:GO:0016810	F:catalytic activity; P:carbohydrate metabolic process; F:hydrolase activity, acting on carbon-nitrogen (but not peptide) bonds	---NA---	NA	---NA---	NA	139978	0	XP_005843698.1	XP_005843698.1 hypothetical protein CHLNCDRAFT_139978 [Chlorella variabilis]<>EFN51596.1 hypothetical protein CHLNCDRAFT_139978 [Chlorella variabilis]	554065	4.2e-204	97.0895	88.6162	389.08	539.988	368.721	284.456	2.82446	2.54372e-07	2.3147	2.62933e-05	NA	NA
NA	OG0000010	15	13	0	g8500	973	---NA---	---NA---	NA	NA	NA	NA	NA	Coil (COILS); IPR002509 (PFAM); IPR032675 (G3DSA:3.80.10.GENE3D); G3DSA:3.20.20.370 (GENE3D); mobidb-lite (MOBIDB_LITE); mobidb-lite (MOBIDB_LITE); PTHR45985 (PANTHER); cd10919 (CDD); SSF52047 (SUPERFAMILY); IPR011330 (SUPERFAMILY)	F:GO:0003824; P:GO:0005975; F:GO:0016810	F:catalytic activity; P:carbohydrate metabolic process; F:hydrolase activity, acting on carbon-nitrogen (but not peptide) bonds	---NA---	NA	---NA---	NA	136748	0	XP_005845575.1	XP_005845575.1 expressed protein [Chlorella variabilis]<>EFN53473.1 expressed protein [Chlorella variabilis]	554065	1.1e-242	51.0131	60.2805	37.4554	122.408	13.1052	30.6143	NA	NA	NA	NA	NA	NA
2	OG0000010	15	13	0	g9458	648	---NA---	---NA---	NA	NA	NA	NA	NA	IPR002509 (PFAM); G3DSA:3.20.20.370 (GENE3D); mobidb-lite (MOBIDB_LITE); mobidb-lite (MOBIDB_LITE); mobidb-lite (MOBIDB_LITE); mobidb-lite (MOBIDB_LITE); mobidb-lite (MOBIDB_LITE); PTHR45985 (PANTHER); cd10919 (CDD); IPR011330 (SUPERFAMILY)	F:GO:0003824; P:GO:0005975; F:GO:0016810	F:catalytic activity; P:carbohydrate metabolic process; F:hydrolase activity, acting on carbon-nitrogen (but not peptide) bonds	---NA---	NA	---NA---	NA	144776	0	XP_005848430.1	XP_005848430.1 hypothetical protein CHLNCDRAFT_144776 [Chlorella variabilis]<>EFN56328.1 hypothetical protein CHLNCDRAFT_144776 [Chlorella variabilis]	554065	1.7e-287	1.48103	0.926641	19.388	12.2319	15.5534	11.4461	4.13911	8.14054e-13	3.98706	7.03911e-12	NA	NA
NA	OG0000010	15	13	0	g9460	327	---NA---	---NA---	NA	NA	NA	NA	NA	IPR002509 (PFAM); G3DSA:3.20.20.370 (GENE3D); PTHR45985 (PANTHER); cd10919 (CDD); IPR011330 (SUPERFAMILY)	F:GO:0003824; P:GO:0005975; F:GO:0016810	F:catalytic activity; P:carbohydrate metabolic process; F:hydrolase activity, acting on carbon-nitrogen (but not peptide) bonds	---NA---	NA	---NA---	NA	138342	0	XP_005844853.1	XP_005844853.1 hypothetical protein CHLNCDRAFT_138342 [Chlorella variabilis]<>EFN52751.1 hypothetical protein CHLNCDRAFT_138342 [Chlorella variabilis]	554065	1.3e-179	4.33337	8.24223	5.5823	1.60711	5.80852	2.90261	NA	NA	NA	NA	NA	NA
NA	OG0000010	15	13	0	g9684	348	---NA---	---NA---	NA	NA	NA	NA	NA	IPR002509 (PFAM); G3DSA:3.20.20.370 (GENE3D); mobidb-lite (MOBIDB_LITE); PTHR45985 (PANTHER); cd10919 (CDD); IPR011330 (SUPERFAMILY)	F:GO:0003824; P:GO:0005975; F:GO:0016810	F:catalytic activity; P:carbohydrate metabolic process; F:hydrolase activity, acting on carbon-nitrogen (but not peptide) bonds	---NA---	NA	---NA---	NA	140524	0	XP_005850876.1	XP_005850876.1 hypothetical protein CHLNCDRAFT_140524 [Chlorella variabilis]<>EFN58774.1 hypothetical protein CHLNCDRAFT_140524 [Chlorella variabilis]	554065	1.3e-201	20.8989	45.7956	15.7265	8.39267	9.69687	13.582	NA	NA	NA	NA	NA	NA
NA	OG0000011	10	8	10	g10337	866	Q95M30	HCK_MACFA Tyrosine-protein kinase HCK OS=Macaca fascicularis OX=9541 GN=HCK PE=2 SV=3	1.66076e-25	50.79	3	C:GO:0005739; C:GO:0005960; P:GO:0019464	C:mitochondrion; C:glycine cleavage complex; P:glycine decarboxylation via glycine cleavage system	IPR003018 (SMART); G3DSA:3.30.200.20 (GENE3D); IPR000719 (PFAM); G3DSA:1.10.510.10 (GENE3D); IPR029016 (G3DSA:3.30.450.GENE3D); mobidb-lite (MOBIDB_LITE); mobidb-lite (MOBIDB_LITE); mobidb-lite (MOBIDB_LITE); mobidb-lite (MOBIDB_LITE); PTHR44329 (PANTHER); IPR008266 (PROSITE_PATTERNS); IPR000719 (PROSITE_PROFILES); SSF55781 (SUPERFAMILY); IPR011009 (SUPERFAMILY)	F:GO:0004672; F:GO:0005515; F:GO:0005524; P:GO:0006468	F:protein kinase activity; F:protein binding; F:ATP binding; P:protein phosphorylation	F4HVH9	3.84321e-25	396097	5.50993e-43	21329	1.98227e-173	PRW44843.1	PRW44843.1 prolyl endopeptidase-like isoform A [Chlorella sorokiniana]	3076	1.2e-147	136.913	63.987	42.9177	86.7391	25.7783	72.5652	NA	NA	NA	NA	NA	NA
1	OG0000011	10	8	10	g11185	1339	P0CD62	LIMKB_DICDI Probable LIM domain-containing serine/threonine-protein kinase DDB_G0286997 OS=Dictyostelium discoideum OX=44689 GN=DDB_G0286997 PE=3 SV=1	3.92611e-23	47.85	8	F:GO:0000166; F:GO:0003746; F:GO:0003924; F:GO:0005525; P:GO:0006412; P:GO:0006414; C:GO:0009507; C:GO:0009536	F:nucleotide binding; F:translation elongation factor activity; F:GTPase activity; F:GTP binding; P:translation; P:translational elongation; C:chloroplast; C:plastid	IPR003018 (SMART); IPR003018 (PFAM); IPR018971 (PFAM); IPR029016 (G3DSA:3.30.450.GENE3D); G3DSA:1.10.510.10 (GENE3D); IPR001245 (PFAM); mobidb-lite (MOBIDB_LITE); mobidb-lite (MOBIDB_LITE); mobidb-lite (MOBIDB_LITE); mobidb-lite (MOBIDB_LITE); mobidb-lite (MOBIDB_LITE); mobidb-lite (MOBIDB_LITE); mobidb-lite (MOBIDB_LITE); mobidb-lite (MOBIDB_LITE); PTHR44329 (PANTHER); IPR008266 (PROSITE_PATTERN…	F:GO:0004672; F:GO:0005515; F:GO:0005524; P:GO:0006468	F:protein kinase activity; F:protein binding; F:ATP binding; P:protein phosphorylation	O22558	9.11914e-22	206108	2.07136e-38	133827	0	PRW58005.1	PRW58005.1 kinase [Chlorella sorokiniana]	3076	6.3e-252	114.642	78.9596	12.125	24.8209	13.2492	16.7585	-1.85149	0.00238406	-2.19522	0.000350599	NA	NA
NA	OG0000011	10	8	10	g2287	916	Q66HA1	M3K11_RAT Mitogen-activated protein kinase kinase kinase 11 OS=Rattus norvegicus OX=10116 GN=Map3k11 PE=1 SV=1	1.02292e-30	46.25	NA	NA	NA	IPR003018 (SMART); G3DSA:3.30.200.20 (GENE3D); G3DSA:1.10.510.10 (GENE3D); IPR001245 (PFAM); IPR029016 (G3DSA:3.30.450.GENE3D); mobidb-lite (MOBIDB_LITE); mobidb-lite (MOBIDB_LITE); mobidb-lite (MOBIDB_LITE); PTHR44329 (PANTHER); PTHR44329:SF93 (PANTHER); IPR017441 (PROSITE_PATTERNS); IPR008266 (PROSITE_PATTERNS); IPR000719 (PROSITE_PROFILES); IPR011009 (SUPERFAMILY); SSF55781 (SUPERFAMILY)	F:GO:0004672; F:GO:0005515; F:GO:0005524; P:GO:0006468	F:protein kinase activity; F:protein binding; F:ATP binding; P:protein phosphorylation	A0A1I9LPU6	5.20568e-30	206108	1.43514e-52	144971	0	XP_005848312.1	XP_005848312.1 hypothetical protein CHLNCDRAFT_144971 [Chlorella variabilis]<>EFN56210.1 hypothetical protein CHLNCDRAFT_144971 [Chlorella variabilis]	554065	3e-229	100.71	80.8617	62.2457	99.6853	63.0777	100.66	NA	NA	NA	NA	NA	NA
3	OG0000011	10	8	10	g2773	796	Q00771	KCC1A_EMENI Calcium/calmodulin-dependent protein kinase cmkA OS=Emericella nidulans (strain FGSC A4 / ATCC 38163 / CBS 112.46 / NRRL 194 / M139) OX=227321 GN=cmkA PE=1 SV=2	5.53058e-09	42.53	NA	NA	NA	IPR000719 (SMART); IPR001245 (PFAM); G3DSA:3.30.450.20 (GENE3D); G3DSA:1.10.510.10 (GENE3D); IPR003018 (PFAM); IPR029016 (G3DSA:3.30.450.GENE3D); G3DSA:3.30.200.20 (GENE3D); mobidb-lite (MOBIDB_LITE); mobidb-lite (MOBIDB_LITE); mobidb-lite (MOBIDB_LITE); mobidb-lite (MOBIDB_LITE); mobidb-lite (MOBIDB_LITE); PTHR43102 (PANTHER); IPR008266 (PROSITE_PATTERNS); IPR017441 (PROSITE_PATTERNS); IPR000719…	F:GO:0004672; F:GO:0005515; F:GO:0005524; P:GO:0006468	F:protein kinase activity; F:protein binding; F:ATP binding; P:protein phosphorylation	Q9C6K9	1.39936e-06	206108	8.35975e-31	140943	0	XP_005850765.1	XP_005850765.1 hypothetical protein CHLNCDRAFT_140943 [Chlorella variabilis]<>EFN58663.1 hypothetical protein CHLNCDRAFT_140943 [Chlorella variabilis]	554065	0	1.865	0.682788	19.8082	1.16069	1.1041	4.49083	3.32589	0.0239241	NA	NA	NA	NA
NA	OG0000011	10	8	10	g6767	842	Q55GU0	Y9955_DICDI Probable serine/threonine-protein kinase DDB_G0267514 OS=Dictyostelium discoideum OX=44689 GN=DDB_G0267514 PE=3 SV=1	2.23124e-27	46.43	NA	NA	NA	G3DSA:1.10.510.10 (GENE3D); IPR029016 (G3DSA:3.30.450.GENE3D); G3DSA:3.30.200.20 (GENE3D); IPR000719 (PFAM); IPR003018 (PFAM); mobidb-lite (MOBIDB_LITE); mobidb-lite (MOBIDB_LITE); mobidb-lite (MOBIDB_LITE); mobidb-lite (MOBIDB_LITE); PTHR43102 (PANTHER); IPR008266 (PROSITE_PATTERNS); IPR017441 (PROSITE_PATTERNS); IPR000719 (PROSITE_PROFILES); IPR011009 (SUPERFAMILY); SSF55781 (SUPERFAMILY)	F:GO:0004672; F:GO:0005515; F:GO:0005524; P:GO:0006468	F:protein kinase activity; F:protein binding; F:ATP binding; P:protein phosphorylation	F4IPV6	1.03864e-29	193209	1.64989e-63	139030	0	XP_005844389.1	XP_005844389.1 expressed protein [Chlorella variabilis]<>EFN52287.1 expressed protein [Chlorella variabilis]	554065	0	169.221	208.933	88.1163	100.667	70.2783	131.932	NA	NA	NA	NA	NA	NA
NA	OG0000011	10	8	10	g8613	473	---NA---	---NA---	NA	NA	NA	NA	NA	mobidb-lite (MOBIDB_LITE); PTHR43102:SF2 (PANTHER); PTHR43102 (PANTHER)	no GO terms	no GO terms	---NA---	NA	206108	1.29531e-27	144815	0	XP_005848446.1	XP_005848446.1 hypothetical protein CHLNCDRAFT_144815 [Chlorella variabilis]<>EFN56344.1 hypothetical protein CHLNCDRAFT_144815 [Chlorella variabilis]	554065	3.1e-246	0.109706	0	0	0	0.0960086	0	NA	NA	NA	NA	NA	NA
NA	OG0000011	10	8	10	g9740	652	Q16584	M3K11_HUMAN Mitogen-activated protein kinase kinase kinase 11 OS=Homo sapiens OX=9606 GN=MAP3K11 PE=1 SV=1	2.88441e-24	42.24	NA	NA	NA	G3DSA:3.30.200.20 (GENE3D); IPR001245 (PFAM); G3DSA:1.10.510.10 (GENE3D); mobidb-lite (MOBIDB_LITE); mobidb-lite (MOBIDB_LITE); mobidb-lite (MOBIDB_LITE); mobidb-lite (MOBIDB_LITE); mobidb-lite (MOBIDB_LITE); mobidb-lite (MOBIDB_LITE); mobidb-lite (MOBIDB_LITE); PTHR44329:SF93 (PANTHER); PTHR44329 (PANTHER); IPR008266 (PROSITE_PATTERNS); IPR017441 (PROSITE_PATTERNS); IPR000719 (PROSITE_PROFILES);…	F:GO:0004672; F:GO:0005524; P:GO:0006468	F:protein kinase activity; F:ATP binding; P:protein phosphorylation	Q9C9U5	4.19958e-26	206108	1.88502e-51	140991	0	XP_005843486.1	XP_005843486.1 hypothetical protein CHLNCDRAFT_140991 [Chlorella variabilis]<>EFN51384.1 hypothetical protein CHLNCDRAFT_140991 [Chlorella variabilis]	554065	2.2e-290	43.3886	32.2374	16.8069	5.89273	30.1467	7.66727	NA	NA	NA	NA	NA	NA
1	OG0000011	10	8	10	g9806	764	Q9C9U5	SIS8_ARATH Probable serine/threonine-protein kinase SIS8 OS=Arabidopsis thaliana OX=3702 GN=SIS8 PE=1 SV=1	8.44079e-28	43.96	7	C:GO:0016020; C:GO:0016021; C:GO:0019012; C:GO:0030430; C:GO:0033644; C:GO:0044165; C:GO:0044167	C:membrane; C:integral component of membrane; C:virion; C:host cell cytoplasm; C:host cell membrane; C:host cell endoplasmic reticulum; C:host cell endoplasmic reticulum membrane	IPR001245 (PFAM); G3DSA:1.10.510.10 (GENE3D); G3DSA:3.30.200.20 (GENE3D); IPR029016 (G3DSA:3.30.450.GENE3D); mobidb-lite (MOBIDB_LITE); PTHR44329 (PANTHER); PTHR44329:SF93 (PANTHER); IPR008266 (PROSITE_PATTERNS); IPR017441 (PROSITE_PATTERNS); IPR000719 (PROSITE_PROFILES); IPR011009 (SUPERFAMILY); SSF55781 (SUPERFAMILY)	F:GO:0004672; F:GO:0005524; P:GO:0006468	F:protein kinase activity; F:ATP binding; P:protein phosphorylation	Q9C9U5	4.66855e-29	185240	2.71191e-41	138454	0	XP_005844903.1	XP_005844903.1 hypothetical protein CHLNCDRAFT_138454 [Chlorella variabilis]<>EFN52801.1 hypothetical protein CHLNCDRAFT_138454 [Chlorella variabilis]	554065	0	178.875	24.5316	12.6652	9.55336	13.0092	21.8517	-2.74221	0.00579028	-2.04764	0.0402773	NA	NA
NA	OG0000012	11	10	7	g10837	3867	Q9ZGI5	PIKA1_STRVZ Narbonolide/10-deoxymethynolide synthase PikA1, modules 1 and 2 OS=Streptomyces venezuelae OX=54571 GN=pikAI PE=1 SV=1	1.22643e-91	46.55	NA	NA	NA	Coil (COILS); IPR020841 (SMART); IPR020843 (SMART); SM00822 (SMART); SM01294 (SMART); IPR020806 (SMART); IPR029058 (G3DSA:3.40.50.GENE3D); IPR014031 (PFAM); IPR013968 (PFAM); IPR016039 (G3DSA:3.40.47.GENE3D); IPR042104 (G3DSA:3.10.129.GENE3D); IPR042104 (G3DSA:3.10.129.GENE3D); IPR020807 (PFAM); IPR016039 (G3DSA:3.40.47.GENE3D); G3DSA:3.40.50.720 (GENE3D); IPR023102 (G3DSA:1.10.1470.GENE3D); PF13…	F:GO:0003824; F:GO:0004312; P:GO:0009058; F:GO:0016491; F:GO:0016788; F:GO:0031177	F:catalytic activity; F:fatty acid synthase activity; P:biosynthetic process; F:oxidoreductase activity; F:hydrolase activity, acting on ester bonds; F:phosphopantetheine binding	A1L4Y4	1.29445e-12	196903	0	57723	0	XP_005847912.1	XP_005847912.1 hypothetical protein CHLNCDRAFT_57723 [Chlorella variabilis]<>EFN55810.1 hypothetical protein CHLNCDRAFT_57723 [Chlorella variabilis]	554065	0	496.199	392.262	303.965	364.679	414.085	361.731	NA	NA	NA	NA	NA	NA
1	OG0000012	11	10	7	g10838	1729	B2HIL7	MSL7_MYCMM Phenolphthiocerol synthesis polyketide synthase type I Pks15/1 OS=Mycobacterium marinum (strain ATCC BAA-535 / M) OX=216594 GN=pks15/1 PE=1 SV=1	3.88787e-61	46.41	NA	NA	NA	SM01294 (SMART); IPR020841 (SMART); IPR020807 (SMART); SM00822 (SMART); IPR020843 (SMART); IPR020806 (SMART); IPR014030 (PFAM); G3DSA:3.40.50.720 (GENE3D); IPR014031 (PFAM); G3DSA:3.90.180.10 (GENE3D); PF13602 (PFAM); IPR042104 (G3DSA:3.10.129.GENE3D); IPR036736 (G3DSA:1.10.1200.GENE3D); G3DSA:3.40.50.720 (GENE3D); IPR020807 (PFAM); IPR013968 (PFAM); G3DSA:3.40.50.720 (GENE3D); IPR009081 (PFAM); …	F:GO:0003824; F:GO:0016491; F:GO:0031177	F:catalytic activity; F:oxidoreductase activity; F:phosphopantetheine binding	O65423	9.98082e-12	196903	1.40224e-142	57723	0	XP_005847912.1	XP_005847912.1 hypothetical protein CHLNCDRAFT_57723 [Chlorella variabilis]<>EFN55810.1 hypothetical protein CHLNCDRAFT_57723 [Chlorella variabilis]	554065	0	25.342	30.0915	14.586	10.1337	3.26429	5.75045	NA	NA	-2.13516	5.95381e-05	NA	NA
3	OG0000012	11	10	7	g10839	1040	Q07017	OL56_STRAT Oleandomycin polyketide synthase, modules 5 and 6 OS=Streptomyces antibioticus OX=1890 GN=orfB PE=3 SV=1	1.58834e-76	46.73	NA	NA	NA	IPR020843 (SMART); IPR020841 (SMART); SM01294 (SMART); IPR020806 (SMART); SM00822 (SMART); G3DSA:3.90.180.10 (GENE3D); IPR014030 (PFAM); IPR013968 (PFAM); IPR016039 (G3DSA:3.40.47.GENE3D); IPR014031 (PFAM); PF13602 (PFAM); G3DSA:3.40.50.720 (GENE3D); IPR036736 (G3DSA:1.10.1200.GENE3D); G3DSA:3.40.50.720 (GENE3D); IPR009081 (PFAM); IPR036736 (G3DSA:1.10.1200.GENE3D); mobidb-lite (MOBIDB_LITE); PTH…	F:GO:0003824; F:GO:0016491; F:GO:0031177	F:catalytic activity; F:oxidoreductase activity; F:phosphopantetheine binding	Q8L3X9	2.68547e-07	196903	3.77355e-135	57723	0	XP_005847912.1	XP_005847912.1 hypothetical protein CHLNCDRAFT_57723 [Chlorella variabilis]<>EFN55810.1 hypothetical protein CHLNCDRAFT_57723 [Chlorella variabilis]	554065	0	0.164559	0.0487706	2.46101	2.72315	3.26429	0.547662	5.01099	2.59503e-05	4.61036	0.00012531	NA	NA
NA	OG0000012	11	10	7	g10840	405	P96202	PPSC_MYCTU Phthiocerol synthesis polyketide synthase type I PpsC OS=Mycobacterium tuberculosis (strain ATCC 25618 / H37Rv) OX=83332 GN=ppsC PE=1 SV=2	6.07952e-33	46.59	NA	NA	NA	IPR020841 (SMART); IPR016039 (G3DSA:3.40.47.GENE3D); IPR016039 (G3DSA:3.40.47.GENE3D); IPR014031 (PFAM); IPR014030 (PFAM); PTHR43775 (PANTHER); PTHR43775:SF7 (PANTHER); cd00833 (CDD); IPR016039 (SUPERFAMILY); IPR016039 (SUPERFAMILY)	F:GO:0003824	F:catalytic activity	Q8L3X9	7.6491e-06	196903	4.67446e-49	57723	3.8361e-173	XP_005847912.1	XP_005847912.1 hypothetical protein CHLNCDRAFT_57723 [Chlorella variabilis]<>EFN55810.1 hypothetical protein CHLNCDRAFT_57723 [Chlorella variabilis]	554065	2.7e-166	0.0548528	0.0487706	0.300124	0.178567	0.0480043	0.109532	NA	NA	NA	NA	NA	NA
NA	OG0000012	11	10	7	g10841	719	Q9ZGI4	PIKA2_STRVZ Narbonolide/10-deoxymethynolide synthase PikA2, modules 3 and 4 OS=Streptomyces venezuelae OX=54571 GN=pikAII PE=1 SV=1	1.45243e-50	54.38	NA	NA	NA	SM00822 (SMART); IPR020806 (SMART); IPR020843 (SMART); SM01294 (SMART); IPR013154 (PFAM); PF13602 (PFAM); IPR013968 (PFAM); G3DSA:3.40.50.720 (GENE3D); IPR009081 (PFAM); G3DSA:3.90.180.10 (GENE3D); G3DSA:3.40.50.720 (GENE3D); IPR036736 (G3DSA:1.10.1200.GENE3D); mobidb-lite (MOBIDB_LITE); PTHR43775:SF29 (PANTHER); PTHR43775 (PANTHER); PTHR43775 (PANTHER); PTHR43775:SF29 (PANTHER); IPR006162 (PROSI…	F:GO:0016491; F:GO:0031177; P:GO:0055114	F:oxidoreductase activity; F:phosphopantetheine binding; P:oxidation-reduction process	O65423	5.87746e-17	196903	8.14523e-93	57723	0	XP_005847912.1	XP_005847912.1 hypothetical protein CHLNCDRAFT_57723 [Chlorella variabilis]<>EFN55810.1 hypothetical protein CHLNCDRAFT_57723 [Chlorella variabilis]	554065	1.5e-300	0	0	0.0600248	0	0.0480043	0	NA	NA	NA	NA	NA	NA
NA	OG0000012	11	10	7	g10842	677	Q07017	OL56_STRAT Oleandomycin polyketide synthase, modules 5 and 6 OS=Streptomyces antibioticus OX=1890 GN=orfB PE=3 SV=1	1.14362e-54	45.15	NA	NA	NA	IPR020806 (SMART); SM01294 (SMART); IPR020841 (SMART); IPR009081 (PFAM); IPR014030 (PFAM); IPR036736 (G3DSA:1.10.1200.GENE3D); G3DSA:3.40.50.720 (GENE3D); IPR036736 (G3DSA:1.10.1200.GENE3D); IPR016039 (G3DSA:3.40.47.GENE3D); IPR014031 (PFAM); PTHR43775 (PANTHER); IPR018201 (PROSITE_PATTERNS); IPR006162 (PROSITE_PATTERNS); IPR006162 (PROSITE_PATTERNS); IPR009081 (PROSITE_PROFILES); IPR009081 (PROS…	F:GO:0003824; F:GO:0031177	F:catalytic activity; F:phosphopantetheine binding	---NA---	NA	196903	5.86895e-80	57723	0	XP_005847912.1	XP_005847912.1 hypothetical protein CHLNCDRAFT_57723 [Chlorella variabilis]<>EFN55810.1 hypothetical protein CHLNCDRAFT_57723 [Chlorella variabilis]	554065	1.7e-274	4.71734	3.12132	4.68193	1.3839	1.77616	1.47869	NA	NA	NA	NA	NA	NA
2	OG0000012	11	10	7	g10843	761	P40806	PKSJ_BACSU Polyketide synthase PksJ OS=Bacillus subtilis (strain 168) OX=224308 GN=pksJ PE=1 SV=3	8.31728e-75	43.46	NA	NA	NA	IPR020841 (SMART); IPR020806 (SMART); SM01294 (SMART); SM00822 (SMART); IPR014030 (PFAM); IPR036736 (G3DSA:1.10.1200.GENE3D); IPR013968 (PFAM); G3DSA:3.40.50.720 (GENE3D); IPR009081 (PFAM); IPR036736 (G3DSA:1.10.1200.GENE3D); IPR016039 (G3DSA:3.40.47.GENE3D); IPR014031 (PFAM); PTHR43775 (PANTHER); IPR006162 (PROSITE_PATTERNS); IPR006162 (PROSITE_PATTERNS); IPR009081 (PROSITE_PROFILES); IPR009081 …	F:GO:0003824; F:GO:0031177	F:catalytic activity; F:phosphopantetheine binding	---NA---	NA	196903	2.08642e-89	57723	0	XP_005847912.1	XP_005847912.1 hypothetical protein CHLNCDRAFT_57723 [Chlorella variabilis]<>EFN55810.1 hypothetical protein CHLNCDRAFT_57723 [Chlorella variabilis]	554065	0	1.64559	0.8291	2.46101	3.48207	4.94444	4.10747	1.77027	0.0145819	2.37191	0.000936175	NA	NA
NA	OG0000012	11	10	7	g10844	2468	Q9ZGI5	PIKA1_STRVZ Narbonolide/10-deoxymethynolide synthase PikA1, modules 1 and 2 OS=Streptomyces venezuelae OX=54571 GN=pikAI PE=1 SV=1	6.79424e-68	45.97	NA	NA	NA	Coil (COILS); IPR020807 (SMART); SM01294 (SMART); SM00822 (SMART); IPR020843 (SMART); IPR020806 (SMART); IPR020841 (SMART); IPR042099 (G3DSA:3.40.50.GENE3D); IPR036736 (G3DSA:1.10.1200.GENE3D); IPR013968 (PFAM); G3DSA:3.40.50.720 (GENE3D); IPR036736 (G3DSA:1.10.1200.GENE3D); IPR009081 (PFAM); G3DSA:3.30.300.30 (GENE3D); IPR000873 (PFAM); IPR036736 (G3DSA:1.10.1200.GENE3D); IPR042104 (G3DSA:3.10.1…	F:GO:0003824; F:GO:0016491; F:GO:0031177	F:catalytic activity; F:oxidoreductase activity; F:phosphopantetheine binding	F4HUK6	3.59104e-54	196903	1.55074e-97	57723	0	PRW57359.1	PRW57359.1 Polyketide synthase [Chlorella sorokiniana]	3076	0	66.5365	74.8629	110.145	64.2396	48.6284	60.8453	NA	NA	NA	NA	NA	NA
NA	OG0000012	11	10	7	g2172	225	Q03132	ERYA2_SACER 6-deoxyerythronolide-B synthase EryA2, modules 3 and 4 OS=Saccharopolyspora erythraea OX=1836 GN=eryA PE=1 SV=3	1.04004e-12	76.36	13	F:GO:0004601; F:GO:0005344; C:GO:0005833; P:GO:0015671; F:GO:0019825; F:GO:0020037; F:GO:0031720; F:GO:0031721; C:GO:0031838; P:GO:0042744; F:GO:0043177; F:GO:0046872; P:GO:0098869	F:peroxidase activity; F:oxygen carrier activity; C:hemoglobin complex; P:oxygen transport; F:oxygen binding; F:heme binding; F:haptoglobin binding; F:hemoglobin alpha binding; C:haptoglobin-hemoglobin complex; P:hydrogen peroxide catabolic process; F:organic acid binding; F:metal ion binding; P:cellular oxidant detoxification	IPR020841 (SMART); IPR016039 (G3DSA:3.40.47.GENE3D); IPR014031 (PFAM); PTHR43775 (PANTHER); PTHR43775:SF7 (PANTHER); IPR016039 (SUPERFAMILY)	F:GO:0003824	F:catalytic activity	---NA---	NA	196903	8.00619e-17	12211	1.99573e-26	XP_005843875.1	XP_005843875.1 hypothetical protein CHLNCDRAFT_12211, partial [Chlorella variabilis]<>EFN51773.1 hypothetical protein CHLNCDRAFT_12211, partial [Chlorella variabilis]	554065	3.2e-31	15.0297	17.85	16.3267	15.8032	10.2729	15.3893	NA	NA	NA	NA	NA	NA
3	OG0000012	11	10	7	g2195	428	Q9ZGI4	PIKA2_STRVZ Narbonolide/10-deoxymethynolide synthase PikA2, modules 3 and 4 OS=Streptomyces venezuelae OX=54571 GN=pikAII PE=1 SV=1	2.00284e-67	53.35	NA	NA	NA	IPR020841 (SMART); IPR014030 (PFAM); IPR014031 (PFAM); IPR016039 (G3DSA:3.40.47.GENE3D); PTHR43775 (PANTHER); PTHR43775:SF7 (PANTHER); cd00833 (CDD); IPR016039 (SUPERFAMILY)	F:GO:0003824	F:catalytic activity	P52410	6.54793e-08	196903	2.36313e-71	12211	9.68844e-166	PSC74592.1	PSC74592.1 Polyketide synthase isoform A [Micractinium conductrix]	554055	3.5e-140	5.26587	6.09633	87.1559	74.2841	51.7967	62.3239	4.27952	1.22819e-20	3.81744	4.99927e-17	NA	NA
NA	OG0000013	9	10	8	g1704	480	Q9M2D2	YU88_ARATH UPF0187 protein At3g61320, chloroplastic OS=Arabidopsis thaliana OX=3702 GN=At3g61320 PE=2 SV=2	1.96135e-57	58.04	NA	NA	NA	IPR021134 (PFAM); mobidb-lite (MOBIDB_LITE); mobidb-lite (MOBIDB_LITE); PTHR33281 (PANTHER)	no GO terms	no GO terms	Q9M2D2	1.08481e-58	393658	2.089e-97	143620	0	XP_005849094.1	XP_005849094.1 hypothetical protein CHLNCDRAFT_143620 [Chlorella variabilis]<>EFN56992.1 hypothetical protein CHLNCDRAFT_143620 [Chlorella variabilis]	554065	2e-264	78.4396	122.512	69.5087	300.708	105.609	107.889	NA	NA	NA	NA	NA	NA
NA	OG0000013	9	10	8	g194	453	Q9M2D2	YU88_ARATH UPF0187 protein At3g61320, chloroplastic OS=Arabidopsis thaliana OX=3702 GN=At3g61320 PE=2 SV=2	8.06448e-60	55.99	NA	NA	NA	IPR021134 (PFAM); mobidb-lite (MOBIDB_LITE); mobidb-lite (MOBIDB_LITE); PTHR33281:SF1 (PANTHER); PTHR33281 (PANTHER)	no GO terms	no GO terms	Q9M2D2	4.46042e-61	401879	1.1562e-92	136634	0	XP_005845524.1	XP_005845524.1 hypothetical protein CHLNCDRAFT_136634 [Chlorella variabilis]<>EFN53422.1 hypothetical protein CHLNCDRAFT_136634 [Chlorella variabilis]	554065	1.3e-238	48.2156	52.0382	52.2816	17.455	41.4277	34.5575	NA	NA	NA	NA	NA	NA
4	OG0000013	9	10	8	g2306	423	Q837V0	Y728_ENTFA Uncharacterized RNA methyltransferase EF_0728 OS=Enterococcus faecalis (strain ATCC 700802 / V583) OX=226185 GN=EF_0728 PE=3 SV=1	1.24008e-54	44.28	NA	NA	NA	G3DSA:3.40.50.150 (GENE3D); G3DSA:2.40.50.140 (GENE3D); IPR010280 (PFAM); G3DSA:3.40.50.150 (GENE3D); IPR002792 (PFAM); mobidb-lite (MOBIDB_LITE); mobidb-lite (MOBIDB_LITE); mobidb-lite (MOBIDB_LITE); IPR010280 (PANTHER); IPR030390 (PROSITE_PATTERNS); IPR002792 (PROSITE_PROFILES); IPR010280 (PROSITE_PROFILES); cd02440 (CDD); IPR029063 (SUPERFAMILY); IPR029063 (SUPERFAMILY); IPR012340 (SUPERFAMILY)	P:GO:0006396; F:GO:0008173	P:RNA processing; F:RNA methyltransferase activity	Q9LU28	5.4281e-55	188565	3.30799e-34	22531	1.56127e-124	XP_005848509.1	XP_005848509.1 hypothetical protein CHLNCDRAFT_22531, partial [Chlorella variabilis]<>EFN56407.1 hypothetical protein CHLNCDRAFT_22531, partial [Chlorella variabilis]	554065	1.9e-125	4.7722	7.70576	14.0458	10.4908	97.7848	20.5921	NA	NA	3.75718	1.17304e-05	NA	NA
NA	OG0000013	9	10	8	g2308	382	O80832	YU87_ARATH UPF0187 protein At2g45870, chloroplastic OS=Arabidopsis thaliana OX=3702 GN=At2g45870 PE=2 SV=1	1.27418e-61	57.72	NA	NA	NA	IPR021134 (PFAM); mobidb-lite (MOBIDB_LITE); PTHR33281 (PANTHER)	no GO terms	no GO terms	O80832	7.04743e-63	393658	6.39109e-88	144992	0	XP_005848510.1	XP_005848510.1 hypothetical protein CHLNCDRAFT_144992 [Chlorella variabilis]<>EFN56408.1 hypothetical protein CHLNCDRAFT_144992 [Chlorella variabilis]	554065	1.1e-169	131.043	148.945	11.5848	289.636	13.8252	81.985	NA	NA	NA	NA	NA	NA
1	OG0000013	9	10	8	g2448	456	Q9M2D2	YU88_ARATH UPF0187 protein At3g61320, chloroplastic OS=Arabidopsis thaliana OX=3702 GN=At3g61320 PE=2 SV=2	7.08806e-55	54.39	NA	NA	NA	IPR021134 (PFAM); PTHR33281 (PANTHER)	no GO terms	no GO terms	Q9M2D2	3.92037e-56	381272	2.22691e-83	141619	0	XP_005843048.1	XP_005843048.1 hypothetical protein CHLNCDRAFT_141619 [Chlorella variabilis]<>EFN50946.1 hypothetical protein CHLNCDRAFT_141619 [Chlorella variabilis]	554065	7.3e-237	588.022	705.808	133.315	420.884	27.2184	92.062	NA	NA	-2.96205	0.00182802	NA	NA
3	OG0000013	9	10	8	g5652	1071	Q9M2D2	YU88_ARATH UPF0187 protein At3g61320, chloroplastic OS=Arabidopsis thaliana OX=3702 GN=At3g61320 PE=2 SV=2	4.90658e-51	56.04	NA	NA	NA	Coil (COILS); IPR021134 (PFAM); IPR002562 (PFAM); IPR036397 (G3DSA:3.30.420.GENE3D); mobidb-lite (MOBIDB_LITE); mobidb-lite (MOBIDB_LITE); mobidb-lite (MOBIDB_LITE); mobidb-lite (MOBIDB_LITE); PTHR33281 (PANTHER); IPR012337 (SUPERFAMILY)	F:GO:0003676; P:GO:0006139; F:GO:0008408	F:nucleic acid binding; P:nucleobase-containing compound metabolic process; F:3'-5' exonuclease activity	Q9M2D2	2.7138e-52	393658	2.73377e-87	140064	0	XP_005843675.1	XP_005843675.1 hypothetical protein CHLNCDRAFT_140064 [Chlorella variabilis]<>EFN51573.1 hypothetical protein CHLNCDRAFT_140064 [Chlorella variabilis]	554065	0	89.1359	79.7399	267.05	201.871	213.091	195.296	1.9166	3.3481e-05	1.77164	0.000147983	NA	NA
NA	OG0000013	9	10	8	g7706	433	Q9M2D2	YU88_ARATH UPF0187 protein At3g61320, chloroplastic OS=Arabidopsis thaliana OX=3702 GN=At3g61320 PE=2 SV=2	3.04952e-58	58.72	NA	NA	NA	IPR021134 (PFAM); PTHR33281 (PANTHER)	no GO terms	no GO terms	Q9M2D2	1.68667e-59	393658	1.17393e-89	32075	0	XP_005845925.1	XP_005845925.1 hypothetical protein CHLNCDRAFT_32075 [Chlorella variabilis]<>EFN53823.1 hypothetical protein CHLNCDRAFT_32075 [Chlorella variabilis]	554065	4.1e-245	170.318	167.429	113.087	734.716	43.2999	284.072	NA	NA	NA	NA	NA	NA
NA	OG0000013	9	10	8	g7710	444	Q9M2D2	YU88_ARATH UPF0187 protein At3g61320, chloroplastic OS=Arabidopsis thaliana OX=3702 GN=At3g61320 PE=2 SV=2	2.832e-58	58.1	NA	NA	NA	IPR021134 (PFAM); PTHR33281 (PANTHER)	no GO terms	no GO terms	Q9M2D2	1.56636e-59	393658	2.39437e-90	58489	0	XP_005845811.1	XP_005845811.1 hypothetical protein CHLNCDRAFT_58489 [Chlorella variabilis]<>EFN53709.1 hypothetical protein CHLNCDRAFT_58489 [Chlorella variabilis]	554065	1.3e-251	449.025	478.391	87.7562	390.84	21.5059	120.979	NA	NA	NA	NA	NA	NA
3	OG0000013	9	10	8	g7832	476	Q9M2D2	YU88_ARATH UPF0187 protein At3g61320, chloroplastic OS=Arabidopsis thaliana OX=3702 GN=At3g61320 PE=2 SV=2	8.65536e-50	55.86	NA	NA	NA	Coil (COILS); IPR021134 (PFAM); mobidb-lite (MOBIDB_LITE); PTHR33281 (PANTHER)	no GO terms	no GO terms	Q9M2D2	4.78723e-51	393658	1.5607e-86	34835	0	XP_005849238.1	XP_005849238.1 hypothetical protein CHLNCDRAFT_34835 [Chlorella variabilis]<>EFN57136.1 hypothetical protein CHLNCDRAFT_34835 [Chlorella variabilis]	554065	8e-202	50.3001	49.746	45.3187	440.571	48.1483	211.507	2.90008	0.0494592	NA	NA	NA	NA
NA	OG0000013	9	10	8	g7834	872	Q31KG6	MNMG_SYNE7 tRNA uridine 5-carboxymethylaminomethyl modification enzyme MnmG OS=Synechococcus elongatus (strain PCC 7942) OX=1140 GN=mnmG PE=3 SV=1	0	73.26	NA	NA	NA	SM01228 (SMART); G3DSA:1.10.10.1800 (GENE3D); PF01134 (PFAM); G3DSA:1.10.150.570 (GENE3D); IPR004416 (TIGRFAM); IPR026904 (PFAM); IPR036188 (G3DSA:3.50.50.GENE3D); mobidb-lite (MOBIDB_LITE); mobidb-lite (MOBIDB_LITE); mobidb-lite (MOBIDB_LITE); mobidb-lite (MOBIDB_LITE); mobidb-lite (MOBIDB_LITE); IPR002218 (PANTHER); PTHR11806:SF10 (PANTHER); IPR002218 (PANTHER); IPR020595 (PROSITE_PATTERNS); IP…	P:GO:0002098; P:GO:0008033; F:GO:0050660	P:tRNA wobble uridine modification; P:tRNA processing; F:flavin adenine dinucleotide binding	Q9SHS2	0	38547	0	30521	0	XP_005849237.1	XP_005849237.1 hypothetical protein CHLNCDRAFT_30521, partial [Chlorella variabilis]<>EFN57135.1 hypothetical protein CHLNCDRAFT_30521, partial [Chlorella variabilis]	554065	0	60.4478	53.9403	30.3725	29.6868	38.9795	33.2979	NA	NA	NA	NA	NA	NA
1	OG0000014	3	4	20	g11486	1299	Q05609	CTR1_ARATH Serine/threonine-protein kinase CTR1 OS=Arabidopsis thaliana OX=3702 GN=CTR1 PE=1 SV=1	2.83904e-45	52.17	NA	NA	NA	IPR000719 (SMART); G3DSA:1.10.510.10 (GENE3D); IPR008979 (G3DSA:2.60.120.GENE3D); IPR032675 (G3DSA:3.80.10.GENE3D); IPR001245 (PFAM); mobidb-lite (MOBIDB_LITE); mobidb-lite (MOBIDB_LITE); mobidb-lite (MOBIDB_LITE); mobidb-lite (MOBIDB_LITE); mobidb-lite (MOBIDB_LITE); mobidb-lite (MOBIDB_LITE); mobidb-lite (MOBIDB_LITE); mobidb-lite (MOBIDB_LITE); PTHR44329:SF47 (PANTHER); PTHR44329 (PANTHER); IP…	F:GO:0004672; F:GO:0005524; P:GO:0006468	F:protein kinase activity; F:ATP binding; P:protein phosphorylation	Q9C902	9.00433e-48	120324	1.13501e-42	13714	3.12125e-85	PSC73922.1	PSC73922.1 Serine threonine-kinase CTR1 [Micractinium conductrix]	554055	2.8e-249	72.2412	60.2317	21.1287	11.2051	11.521	30.45	-1.62427	0.00686702	NA	NA	NA	NA
NA	OG0000014	3	4	20	g3330	1290	Q54H46	DRKA_DICDI Probable serine/threonine-protein kinase drkA OS=Dictyostelium discoideum OX=44689 GN=drkA PE=3 SV=1	1.57143e-49	53.87	NA	NA	NA	IPR000719 (SMART); IPR001245 (PFAM); G3DSA:1.10.510.10 (GENE3D); IPR008979 (G3DSA:2.60.120.GENE3D); IPR032675 (G3DSA:3.80.10.GENE3D); mobidb-lite (MOBIDB_LITE); mobidb-lite (MOBIDB_LITE); mobidb-lite (MOBIDB_LITE); mobidb-lite (MOBIDB_LITE); mobidb-lite (MOBIDB_LITE); mobidb-lite (MOBIDB_LITE); mobidb-lite (MOBIDB_LITE); mobidb-lite (MOBIDB_LITE); PTHR23257 (PANTHER); IPR017441 (PROSITE_PATTERNS)…	F:GO:0004672; F:GO:0005524; P:GO:0006468	F:protein kinase activity; F:ATP binding; P:protein phosphorylation	A0A1I9LPU6	2.14142e-49	102541	9.51115e-47	23857	9.54979e-98	PRW57416.1	PRW57416.1 Serine threonine- kinase CTR1 [Chlorella sorokiniana]	3076	1.4e-280	155.508	136.168	113.027	63.1236	115.978	99.7293	NA	NA	NA	NA	NA	NA
NA	OG0000014	3	4	20	g4322	835	Q54TM7	DRKD_DICDI Probable serine/threonine-protein kinase drkD OS=Dictyostelium discoideum OX=44689 GN=drkD PE=2 SV=1	5.04021e-49	53.02	NA	NA	NA	IPR000719 (SMART); G3DSA:1.10.510.10 (GENE3D); G3DSA:3.30.200.20 (GENE3D); IPR032675 (G3DSA:3.80.10.GENE3D); IPR001245 (PFAM); IPR013210 (PFAM); mobidb-lite (MOBIDB_LITE); mobidb-lite (MOBIDB_LITE); mobidb-lite (MOBIDB_LITE); PTHR44329 (PANTHER); IPR017441 (PROSITE_PATTERNS); IPR008271 (PROSITE_PATTERNS); IPR000719 (PROSITE_PROFILES); cd13999 (CDD); SSF52058 (SUPERFAMILY); IPR011009 (SUPERFAMILY)	F:GO:0004672; F:GO:0005524; P:GO:0006468	F:protein kinase activity; F:ATP binding; P:protein phosphorylation	A0A1I9LPU6	1.98965e-52	102541	1.48848e-41	12761	4.75128e-127	PRW44271.1	PRW44271.1 Serine threonine- kinase CTR1 [Chlorella sorokiniana]	3076	4.7e-173	405.143	292.185	207.986	183.924	254.999	156.303	NA	NA	NA	NA	NA	NA
NA	OG0000014	3	4	20	g493	1257	Q05609	CTR1_ARATH Serine/threonine-protein kinase CTR1 OS=Arabidopsis thaliana OX=3702 GN=CTR1 PE=1 SV=1	1.9602e-50	57.04	NA	NA	NA	IPR000719 (SMART); IPR032675 (G3DSA:3.80.10.GENE3D); G3DSA:1.10.510.10 (GENE3D); IPR008979 (G3DSA:2.60.120.GENE3D); IPR001245 (PFAM); mobidb-lite (MOBIDB_LITE); mobidb-lite (MOBIDB_LITE); mobidb-lite (MOBIDB_LITE); PTHR44329:SF47 (PANTHER); PTHR44329 (PANTHER); IPR008271 (PROSITE_PATTERNS); IPR017441 (PROSITE_PATTERNS); IPR000719 (PROSITE_PROFILES); cd13999 (CDD); SSF52058 (SUPERFAMILY); IPR01100…	F:GO:0004672; F:GO:0005524; P:GO:0006468	F:protein kinase activity; F:ATP binding; P:protein phosphorylation	Q05609	1.08417e-51	120324	1.91516e-51	25821	5.75453e-112	PRW60135.1	PRW60135.1 Serine threonine- kinase CTR1 isoform A [Chlorella sorokiniana]<>PRW60136.1 Serine threonine- kinase CTR1 isoform B [Chlorella sorokiniana]	3076	9.9e-284	24.3547	32.53	20.5285	14.6872	31.6828	27.2736	NA	NA	NA	NA	NA	NA
NA	OG0000015	25	1	0	g7656	410	Q12955	ANK3_HUMAN Ankyrin-3 OS=Homo sapiens OX=9606 GN=ANK3 PE=1 SV=3	1.49835e-29	47.58	6	F:GO:0003729; F:GO:0003735; C:GO:0005762; C:GO:0005840; P:GO:0006412; P:GO:0017148	F:mRNA binding; F:structural constituent of ribosome; C:mitochondrial large ribosomal subunit; C:ribosome; P:translation; P:negative regulation of translation	IPR002110 (SMART); IPR020683 (PFAM); IPR036770 (G3DSA:1.25.40.GENE3D); IPR002893 (PFAM); IPR036770 (G3DSA:1.25.40.GENE3D); G3DSA:3.30.60.180 (GENE3D); IPR036770 (G3DSA:1.25.40.GENE3D); IPR036770 (G3DSA:1.25.40.GENE3D); PTHR24126 (PANTHER); IPR020683 (PROSITE_PROFILES); IPR002110 (PROSITE_PROFILES); IPR002110 (PROSITE_PROFILES); IPR002110 (PROSITE_PROFILES); IPR002893 (PROSITE_PROFILES); IPR002110…	F:GO:0005515	F:protein binding	Q6NLQ8	3.62007e-11	123395	1.10951e-22	13257	4.78053e-50	XP_005846816.1	XP_005846816.1 hypothetical protein CHLNCDRAFT_13257, partial [Chlorella variabilis]<>EFN54714.1 hypothetical protein CHLNCDRAFT_13257, partial [Chlorella variabilis]	554065	3.6e-09	2.63294	1.95082	0.420173	2.27674	1.34412	2.24541	NA	NA	NA	NA	NA	NA
2	OG0000016	9	12	4	g11536	469	---NA---	---NA---	NA	NA	NA	NA	NA	no IPS match	no IPS match	no IPS match	---NA---	NA	409762	1.06061e-30	54331	0	XP_005844782.1	XP_005844782.1 hypothetical protein CHLNCDRAFT_54331 [Chlorella variabilis]<>EFN52680.1 hypothetical protein CHLNCDRAFT_54331 [Chlorella variabilis]	554065	1.4e-254	44.9793	63.4506	150.722	303.565	216.403	216.162	2.59855	3.01184e-05	2.48952	7.30935e-05	NA	NA
NA	OG0000016	9	12	4	g11539	494	P31178	GLE_CHLRE Autolysin OS=Chlamydomonas reinhardtii OX=3055 PE=1 SV=1	7.90653e-08	39.33	8	F:GO:0000287; F:GO:0003677; F:GO:0004519; F:GO:0008168; F:GO:0009036; P:GO:0009307; P:GO:0032259; P:GO:0090305	F:magnesium ion binding; F:DNA binding; F:endonuclease activity; F:methyltransferase activity; F:type II site-specific deoxyribonuclease activity; P:DNA restriction-modification system; P:methylation; P:nucleic acid phosphodiester bond hydrolysis	IPR008752 (PFAM)	no GO terms	no GO terms	---NA---	NA	409762	3.04764e-31	138651	0	XP_005844780.1	XP_005844780.1 expressed protein [Chlorella variabilis]<>EFN52678.1 expressed protein [Chlorella variabilis]	554065	1.9e-294	3.45573	5.36477	0.780322	2.85708	3.93635	1.04056	NA	NA	NA	NA	NA	NA
NA	OG0000016	9	12	4	g1907	355	P31178	GLE_CHLRE Autolysin OS=Chlamydomonas reinhardtii OX=3055 PE=1 SV=1	6.14263e-13	35.92	8	F:GO:0000287; F:GO:0003677; F:GO:0004519; F:GO:0008168; F:GO:0009036; P:GO:0009307; P:GO:0032259; P:GO:0090305	F:magnesium ion binding; F:DNA binding; F:endonuclease activity; F:methyltransferase activity; F:type II site-specific deoxyribonuclease activity; P:DNA restriction-modification system; P:methylation; P:nucleic acid phosphodiester bond hydrolysis	IPR008752 (PFAM); SSF55486 (SUPERFAMILY)	no GO terms	no GO terms	---NA---	NA	409762	9.70236e-33	141322	0	XP_005843280.1	XP_005843280.1 hypothetical protein CHLNCDRAFT_141322 [Chlorella variabilis]<>EFN51178.1 hypothetical protein CHLNCDRAFT_141322 [Chlorella variabilis]	554065	4.9e-188	25.726	37.3583	2.70111	11.6515	17.8096	12.651	NA	NA	NA	NA	NA	NA
1	OG0000016	9	12	4	g5867	522	P31178	GLE_CHLRE Autolysin OS=Chlamydomonas reinhardtii OX=3055 PE=1 SV=1	4.02266e-06	45.1	8	F:GO:0000287; F:GO:0003677; F:GO:0004519; F:GO:0008168; F:GO:0009036; P:GO:0009307; P:GO:0032259; P:GO:0090305	F:magnesium ion binding; F:DNA binding; F:endonuclease activity; F:methyltransferase activity; F:type II site-specific deoxyribonuclease activity; P:DNA restriction-modification system; P:methylation; P:nucleic acid phosphodiester bond hydrolysis	mobidb-lite (MOBIDB_LITE); mobidb-lite (MOBIDB_LITE); mobidb-lite (MOBIDB_LITE)	no GO terms	no GO terms	---NA---	NA	326003	1.95283e-25	144102	0	XP_005848604.1	XP_005848604.1 hypothetical protein CHLNCDRAFT_144102 [Chlorella variabilis]<>EFN56502.1 hypothetical protein CHLNCDRAFT_144102 [Chlorella variabilis]	554065	2.8e-272	14.7006	46.3321	0.12005	0.267851	0.192017	0.985792	-6.71828	9.89202e-10	-5.22482	3.65013e-07	NA	NA
NA	OG0000016	9	12	4	g6551	292	P31178	GLE_CHLRE Autolysin OS=Chlamydomonas reinhardtii OX=3055 PE=1 SV=1	3.01213e-06	43.92	8	F:GO:0000287; F:GO:0003677; F:GO:0004519; F:GO:0008168; F:GO:0009036; P:GO:0009307; P:GO:0032259; P:GO:0090305	F:magnesium ion binding; F:DNA binding; F:endonuclease activity; F:methyltransferase activity; F:type II site-specific deoxyribonuclease activity; P:DNA restriction-modification system; P:methylation; P:nucleic acid phosphodiester bond hydrolysis	IPR008752 (PFAM); mobidb-lite (MOBIDB_LITE)	no GO terms	no GO terms	---NA---	NA	326003	4.65311e-21	138290	8.3294e-113	XP_005844943.1	XP_005844943.1 hypothetical protein CHLNCDRAFT_138290 [Chlorella variabilis]<>EFN52841.1 hypothetical protein CHLNCDRAFT_138290 [Chlorella variabilis]	554065	3.5e-91	15.9622	13.0705	15.7265	3.61599	9.31284	14.9512	NA	NA	NA	NA	NA	NA
2	OG0000016	9	12	4	g6672	488	P31178	GLE_CHLRE Autolysin OS=Chlamydomonas reinhardtii OX=3055 PE=1 SV=1	3.59516e-10	36.28	8	F:GO:0000287; F:GO:0003677; F:GO:0004519; F:GO:0008168; F:GO:0009036; P:GO:0009307; P:GO:0032259; P:GO:0090305	F:magnesium ion binding; F:DNA binding; F:endonuclease activity; F:methyltransferase activity; F:type II site-specific deoxyribonuclease activity; P:DNA restriction-modification system; P:methylation; P:nucleic acid phosphodiester bond hydrolysis	IPR008752 (PFAM); mobidb-lite (MOBIDB_LITE); mobidb-lite (MOBIDB_LITE); SSF55486 (SUPERFAMILY)	no GO terms	no GO terms	---NA---	NA	409762	3.28147e-34	58933	0	XP_005844350.1	XP_005844350.1 hypothetical protein CHLNCDRAFT_58933 [Chlorella variabilis]<>EFN52248.1 hypothetical protein CHLNCDRAFT_58933 [Chlorella variabilis]	554065	5.2e-289	63.9036	75.9358	191.419	223.611	221.3	194.803	2.0532	3.7355e-05	2.06965	3.85456e-05	NA	NA
2	OG0000016	9	12	4	g7163	592	---NA---	---NA---	NA	NA	NA	NA	NA	IPR008752 (PFAM); SSF55486 (SUPERFAMILY)	no GO terms	no GO terms	---NA---	NA	409762	4.77018e-33	138049	0	XP_005851564.1	XP_005851564.1 hypothetical protein CHLNCDRAFT_138049 [Chlorella variabilis]<>EFN59462.1 hypothetical protein CHLNCDRAFT_138049 [Chlorella variabilis]	554065	0	56.7727	49.8923	83.4944	144.193	121.115	95.567	1.61561	0.00436453	1.52262	0.00766972	NA	NA
1	OG0000016	9	12	4	g7512	433	---NA---	---NA---	NA	NA	NA	NA	NA	IPR008752 (PFAM); SSF55486 (SUPERFAMILY)	no GO terms	no GO terms	---NA---	NA	409762	2.38295e-21	143945	0	XP_005849419.1	XP_005849419.1 hypothetical protein CHLNCDRAFT_143945 [Chlorella variabilis]<>EFN57317.1 hypothetical protein CHLNCDRAFT_143945 [Chlorella variabilis]	554065	1.9e-165	7.18572	4.63321	0	0.223209	0.0480043	0.219065	-4.99778	3.96174e-07	-4.95612	5.91943e-07	NA	NA
NA	OG0000016	9	12	4	g7513	483	P31178	GLE_CHLRE Autolysin OS=Chlamydomonas reinhardtii OX=3055 PE=1 SV=1	1.69934e-11	36.97	8	F:GO:0000287; F:GO:0003677; F:GO:0004519; F:GO:0008168; F:GO:0009036; P:GO:0009307; P:GO:0032259; P:GO:0090305	F:magnesium ion binding; F:DNA binding; F:endonuclease activity; F:methyltransferase activity; F:type II site-specific deoxyribonuclease activity; P:DNA restriction-modification system; P:methylation; P:nucleic acid phosphodiester bond hydrolysis	IPR008752 (PFAM)	no GO terms	no GO terms	---NA---	NA	196905	8.79417e-25	143946	0	XP_005849420.1	XP_005849420.1 hypothetical protein CHLNCDRAFT_143946 [Chlorella variabilis]<>EFN57318.1 hypothetical protein CHLNCDRAFT_143946 [Chlorella variabilis]	554065	2.6e-264	44.8148	17.216	51.7413	28.3476	55.445	26.7259	NA	NA	NA	NA	NA	NA
NA	OG0000016	9	12	4	g7514	407	P31178	GLE_CHLRE Autolysin OS=Chlamydomonas reinhardtii OX=3055 PE=1 SV=1	7.04384e-10	37.06	8	F:GO:0000287; F:GO:0003677; F:GO:0004519; F:GO:0008168; F:GO:0009036; P:GO:0009307; P:GO:0032259; P:GO:0090305	F:magnesium ion binding; F:DNA binding; F:endonuclease activity; F:methyltransferase activity; F:type II site-specific deoxyribonuclease activity; P:DNA restriction-modification system; P:methylation; P:nucleic acid phosphodiester bond hydrolysis	IPR008752 (PFAM); SSF55486 (SUPERFAMILY)	no GO terms	no GO terms	---NA---	NA	409762	1.62963e-24	143947	0	XP_005849421.1	XP_005849421.1 hypothetical protein CHLNCDRAFT_143947 [Chlorella variabilis]<>EFN57319.1 hypothetical protein CHLNCDRAFT_143947 [Chlorella variabilis]	554065	5.8e-217	77.5619	51.3067	35.4146	24.062	33.171	27.4926	NA	NA	NA	NA	NA	NA
NA	OG0000016	9	12	4	g8508	592	---NA---	---NA---	NA	NA	NA	NA	NA	IPR008752 (PFAM)	no GO terms	no GO terms	---NA---	NA	409762	1.01351e-31	136757	0	XP_005845579.1	XP_005845579.1 expressed protein [Chlorella variabilis]<>EFN53477.1 expressed protein [Chlorella variabilis]	554065	0	107.841	65.2063	35.8948	34.9546	28.9466	37.4601	NA	NA	NA	NA	NA	NA
NA	OG0000016	9	12	4	g9506	429	---NA---	---NA---	NA	NA	NA	NA	NA	IPR008752 (PFAM); SSF55486 (SUPERFAMILY)	no GO terms	no GO terms	---NA---	NA	409762	1.42345e-26	138290	0	XP_005844943.1	XP_005844943.1 hypothetical protein CHLNCDRAFT_138290 [Chlorella variabilis]<>EFN52841.1 hypothetical protein CHLNCDRAFT_138290 [Chlorella variabilis]	554065	1.7e-251	377.497	365.146	219.39	186.692	220.388	195.68	NA	NA	NA	NA	NA	NA
NA	OG0000017	13	9	3	g10406	256	---NA---	---NA---	NA	NA	NA	NA	NA	no IPS match	no IPS match	no IPS match	---NA---	NA	---NA---	NA	---NA---	NA	NA	NA	NA	NA	0.164559	0.341394	0.180074	0.624986	0.576052	0.43813	NA	NA	NA	NA	NA	NA
NA	OG0000017	13	9	3	g10794	171	---NA---	---NA---	NA	NA	NA	NA	NA	IPR013783 (G3DSA:2.60.40.GENE3D); IPR036116 (SUPERFAMILY)	F:GO:0005515	F:protein binding	---NA---	NA	---NA---	NA	136234	2.95858e-121	XP_005846201.1	XP_005846201.1 hypothetical protein CHLNCDRAFT_136234 [Chlorella variabilis]<>EFN54099.1 hypothetical protein CHLNCDRAFT_136234 [Chlorella variabilis]	554065	4.2e-84	0.713087	0.195082	0.12005	0.223209	0.720065	0.273831	NA	NA	NA	NA	NA	NA
NA	OG0000017	13	9	3	g11190	1371	Q99MS4	PRS29_MOUSE Serine protease 29 OS=Mus musculus OX=10090 GN=Prss29 PE=1 SV=2	3.29582e-20	46.3	NA	NA	NA	IPR001314 (PRINTS); IPR001254 (SMART); IPR001254 (PFAM); G3DSA:2.40.10.10 (GENE3D); G3DSA:2.40.10.10 (GENE3D); mobidb-lite (MOBIDB_LITE); mobidb-lite (MOBIDB_LITE); mobidb-lite (MOBIDB_LITE); mobidb-lite (MOBIDB_LITE); PTHR24276 (PANTHER); IPR033116 (PROSITE_PATTERNS); IPR018114 (PROSITE_PATTERNS); IPR001254 (PROSITE_PROFILES); IPR001254 (CDD); IPR009003 (SUPERFAMILY)	F:GO:0004252; P:GO:0006508	F:serine-type endopeptidase activity; P:proteolysis	---NA---	NA	---NA---	NA	133829	1.78524e-96	XP_005847576.1	XP_005847576.1 hypothetical protein CHLNCDRAFT_133829 [Chlorella variabilis]<>EFN55474.1 hypothetical protein CHLNCDRAFT_133829 [Chlorella variabilis]	554065	1.5e-115	550.722	594.075	778.221	744.983	991.145	623.075	NA	NA	NA	NA	NA	NA
NA	OG0000017	13	9	3	g2483	1092	Q9NR16	C163B_HUMAN Scavenger receptor cysteine-rich type 1 protein M160 OS=Homo sapiens OX=9606 GN=CD163L1 PE=1 SV=2	3.5518e-30	36.94	NA	NA	NA	IPR017448 (SMART); IPR001190 (PFAM); IPR036772 (G3DSA:3.10.250.GENE3D); IPR036772 (G3DSA:3.10.250.GENE3D); PTHR19331:SF456 (PANTHER); PTHR19331 (PANTHER); PTHR19331:SF456 (PANTHER); PTHR19331 (PANTHER); IPR001190 (PROSITE_PROFILES); IPR001190 (PROSITE_PROFILES); IPR001190 (PROSITE_PROFILES); IPR001190 (PROSITE_PROFILES); IPR001190 (PROSITE_PROFILES); IPR001190 (PROSITE_PROFILES); IPR001190 (PROSI…	F:GO:0005044; C:GO:0016020	F:scavenger receptor activity; C:membrane	---NA---	NA	170366	6.36383e-12	140164	0	XP_005843597.1	XP_005843597.1 hypothetical protein CHLNCDRAFT_140164 [Chlorella variabilis]<>EFN51495.1 hypothetical protein CHLNCDRAFT_140164 [Chlorella variabilis]	554065	0	215.846	187.035	158.225	188.835	165.039	193.763	NA	NA	NA	NA	NA	NA
NA	OG0000017	13	9	3	g2825	1077	---NA---	---NA---	NA	NA	NA	NA	NA	PR01217 (PRINTS); IPR003961 (SMART); IPR013783 (G3DSA:2.60.40.GENE3D); mobidb-lite (MOBIDB_LITE); mobidb-lite (MOBIDB_LITE); mobidb-lite (MOBIDB_LITE); mobidb-lite (MOBIDB_LITE); PTHR13037:SF19 (PANTHER); PTHR13037:SF19 (PANTHER); PTHR13037 (PANTHER); IPR003961 (PROSITE_PROFILES); IPR003961 (PROSITE_PROFILES); IPR003961 (PROSITE_PROFILES); IPR036116 (SUPERFAMILY); IPR036116 (SUPERFAMILY)	F:GO:0005515	F:protein binding	---NA---	NA	---NA---	NA	143404	0	XP_005842781.1	XP_005842781.1 hypothetical protein CHLNCDRAFT_143404 [Chlorella variabilis]<>EFN50666.1 hypothetical protein CHLNCDRAFT_143404 [Chlorella variabilis]	554065	2e-208	36.6965	31.7984	30.3125	26.5619	60.3894	27.3831	NA	NA	NA	NA	NA	NA
1	OG0000017	13	9	3	g2936	448	Q9FN03	UVR8_ARATH Ultraviolet-B receptor UVR8 OS=Arabidopsis thaliana OX=3702 GN=UVR8 PE=1 SV=1	2.52541e-15	40.66	NA	NA	NA	IPR000408 (PRINTS); IPR009091 (G3DSA:2.130.10.GENE3D); PF13540 (PFAM); IPR000408 (PFAM); IPR009091 (G3DSA:2.130.10.GENE3D); mobidb-lite (MOBIDB_LITE); mobidb-lite (MOBIDB_LITE); PTHR45982 (PANTHER); IPR000408 (PROSITE_PROFILES); IPR000408 (PROSITE_PROFILES); IPR000408 (PROSITE_PROFILES); IPR000408 (PROSITE_PROFILES); IPR000408 (PROSITE_PROFILES); IPR009091 (SUPERFAMILY); IPR009091 (SUPERFAMILY)	no GO terms	no GO terms	Q0WSJ9	1.66123e-17	108218	2.58259e-22	57670	0	XP_005848553.1	XP_005848553.1 hypothetical protein CHLNCDRAFT_57670 [Chlorella variabilis]<>EFN56451.1 hypothetical protein CHLNCDRAFT_57670 [Chlorella variabilis]	554065	1.6e-212	35.2704	29.4574	10.7444	7.27662	8.8808	8.87213	-1.41101	0.00311353	-1.36878	0.00439795	NA	NA
3	OG0000017	13	9	3	g5408	506	---NA---	---NA---	NA	NA	NA	NA	NA	no IPS match	no IPS match	no IPS match	---NA---	NA	---NA---	NA	50528	0	XP_005849987.1	XP_005849987.1 hypothetical protein CHLNCDRAFT_50528 [Chlorella variabilis]<>EFN57885.1 hypothetical protein CHLNCDRAFT_50528 [Chlorella variabilis]	554065	3.3e-262	0.164559	0	1.74072	0.491061	0.720065	0.273831	4.05037	0.000558654	3.05436	0.0140143	NA	NA
NA	OG0000017	13	9	3	g9374	1597	F7J220	SRCR1_PATPE Scavenger receptor cysteine-rich domain superfamily protein OS=Patiria pectinifera OX=7594 GN=SRCR1 PE=1 SV=1	5.69852e-59	40.1	NA	NA	NA	IPR001190 (PRINTS); IPR017448 (SMART); IPR036772 (G3DSA:3.10.250.GENE3D); G3DSA:3.30.30.180 (GENE3D); IPR003609 (PFAM); IPR036772 (G3DSA:3.10.250.GENE3D); IPR001190 (PFAM); IPR036772 (G3DSA:3.10.250.GENE3D); PTHR19331 (PANTHER); PTHR19331:SF451 (PANTHER); PTHR19331:SF451 (PANTHER); PTHR19331 (PANTHER); IPR001190 (PROSITE_PROFILES); IPR001190 (PROSITE_PROFILES); IPR001190 (PROSITE_PROFILES); IPR00…	F:GO:0005044; C:GO:0016020	F:scavenger receptor activity; C:membrane	---NA---	NA	206464	1.10508e-26	56473	0	XP_005851722.1	XP_005851722.1 hypothetical protein CHLNCDRAFT_56473 [Chlorella variabilis]<>EFN59620.1 hypothetical protein CHLNCDRAFT_56473 [Chlorella variabilis]	554065	0	216.01	211.372	224.072	183.657	170.847	145.404	NA	NA	NA	NA	NA	NA
NA	OG0000017	13	9	3	g9375	458	F7J220	SRCR1_PATPE Scavenger receptor cysteine-rich domain superfamily protein OS=Patiria pectinifera OX=7594 GN=SRCR1 PE=1 SV=1	3.61292e-29	43.29	NA	NA	NA	IPR001190 (PRINTS); IPR017448 (SMART); IPR001190 (PFAM); IPR036772 (G3DSA:3.10.250.GENE3D); PTHR19331 (PANTHER); PTHR19331:SF451 (PANTHER); PTHR19331:SF451 (PANTHER); PTHR19331 (PANTHER); IPR001190 (PROSITE_PROFILES); IPR001190 (PROSITE_PROFILES); IPR001190 (PROSITE_PROFILES); IPR001190 (PROSITE_PROFILES); IPR036772 (SUPERFAMILY); IPR036772 (SUPERFAMILY); IPR036772 (SUPERFAMILY); IPR036772 (SUPER…	F:GO:0005044; C:GO:0016020	F:scavenger receptor activity; C:membrane	---NA---	NA	206464	9.64361e-19	56473	0	XP_005851722.1	XP_005851722.1 hypothetical protein CHLNCDRAFT_56473 [Chlorella variabilis]<>EFN59620.1 hypothetical protein CHLNCDRAFT_56473 [Chlorella variabilis]	554065	4.3e-221	0.219411	0.292624	0.180074	0	0.288026	0.164299	NA	NA	NA	NA	NA	NA
NA	OG0000018	14	7	3	g2679	122	Q9SI96	H2B3_ARATH Histone H2B.3 OS=Arabidopsis thaliana OX=3702 GN=At2g28720 PE=1 SV=3	8.46142e-53	69.54	4	F:GO:0004721; P:GO:0006470; F:GO:0016787; F:GO:0046872	F:phosphoprotein phosphatase activity; P:protein dephosphorylation; F:hydrolase activity; F:metal ion binding	IPR000558 (PRINTS); IPR000558 (SMART); IPR009072 (G3DSA:1.10.20.GENE3D); IPR007125 (PFAM); mobidb-lite (MOBIDB_LITE); IPR000558 (PANTHER); PTHR23428:SF230 (PANTHER); IPR000558 (PROSITE_PATTERNS); IPR009072 (SUPERFAMILY)	C:GO:0000786; F:GO:0003677; F:GO:0046982	C:nucleosome; F:DNA binding; F:protein heterodimerization activity	Q9SI96	4.67996e-54	124894	7.29518e-53	28493	2.51703e-84	XP_005843124.1	XP_005843124.1 hypothetical protein CHLNCDRAFT_55388 [Chlorella variabilis]<>XP_005843134.1 hypothetical protein CHLNCDRAFT_28493 [Chlorella variabilis]<>EFN51022.1 hypothetical protein CHLNCDRAFT_55388 [Chlorella variabilis]<>EFN51032.1 hypothetical protein CHLNCDRAFT_28493 [Chlorella variabilis]	554065	2.6e-40	0.603381	0.146312	0.420173	0.267851	0.144013	0.219065	NA	NA	NA	NA	NA	NA
NA	OG0000018	14	7	3	g3299	122	P05621	H2B2_WHEAT Histone H2B.2 OS=Triticum aestivum OX=4565 PE=1 SV=2	1.07809e-52	91	NA	NA	NA	IPR000558 (PRINTS); IPR000558 (SMART); IPR009072 (G3DSA:1.10.20.GENE3D); IPR007125 (PFAM); mobidb-lite (MOBIDB_LITE); IPR000558 (PANTHER); PTHR23428:SF230 (PANTHER); IPR000558 (PROSITE_PATTERNS); IPR009072 (SUPERFAMILY)	C:GO:0000786; F:GO:0003677; F:GO:0046982	C:nucleosome; F:DNA binding; F:protein heterodimerization activity	Q9SI96	8.26908e-54	124894	9.18391e-53	23970	2.06576e-84	XP_005846939.1	XP_005846939.1 hypothetical protein CHLNCDRAFT_23970 [Chlorella variabilis]<>EFN54837.1 hypothetical protein CHLNCDRAFT_23970 [Chlorella variabilis]	554065	1.1e-38	0.0548528	0.0975412	0.12005	0.223209	0.192017	0	NA	NA	NA	NA	NA	NA
2	OG0000018	14	7	3	g5715	121	P05621	H2B2_WHEAT Histone H2B.2 OS=Triticum aestivum OX=4565 PE=1 SV=2	1.79742e-53	81.75	NA	NA	NA	IPR000558 (PRINTS); IPR000558 (SMART); IPR007125 (PFAM); IPR009072 (G3DSA:1.10.20.GENE3D); mobidb-lite (MOBIDB_LITE); IPR000558 (PANTHER); PTHR23428:SF230 (PANTHER); IPR000558 (PROSITE_PATTERNS); IPR009072 (SUPERFAMILY)	C:GO:0000786; F:GO:0003677; F:GO:0046982	C:nucleosome; F:DNA binding; F:protein heterodimerization activity	Q9SI96	2.20533e-51	124894	6.42335e-53	27882	2.16939e-83	XP_005843706.1	XP_005843706.1 hypothetical protein CHLNCDRAFT_27882 [Chlorella variabilis]<>EFN51604.1 hypothetical protein CHLNCDRAFT_27882 [Chlorella variabilis]	554065	8.4e-39	15.6331	9.9492	28.992	24.4637	34.9951	19.0586	1.51929	0.00565187	1.58735	0.00399754	NA	NA
NA	OG0000018	14	7	3	g5721	121	P05621	H2B2_WHEAT Histone H2B.2 OS=Triticum aestivum OX=4565 PE=1 SV=2	1.0627e-53	81.75	NA	NA	NA	IPR000558 (PRINTS); IPR000558 (SMART); IPR007125 (PFAM); IPR009072 (G3DSA:1.10.20.GENE3D); mobidb-lite (MOBIDB_LITE); PTHR23428:SF230 (PANTHER); IPR000558 (PANTHER); IPR000558 (PROSITE_PATTERNS); IPR009072 (SUPERFAMILY)	C:GO:0000786; F:GO:0003677; F:GO:0046982	C:nucleosome; F:DNA binding; F:protein heterodimerization activity	Q9SI96	3.07576e-52	124894	5.50931e-53	27834	3.08237e-83	XP_005843643.1	XP_005843643.1 hypothetical protein CHLNCDRAFT_27834 [Chlorella variabilis]<>EFN51541.1 hypothetical protein CHLNCDRAFT_27834 [Chlorella variabilis]	554065	2.4e-38	0.164559	0.0487706	0	0.0892837	0.240022	0.109532	NA	NA	NA	NA	NA	NA
NA	OG0000018	14	7	3	g6627	122	Q9SI96	H2B3_ARATH Histone H2B.3 OS=Arabidopsis thaliana OX=3702 GN=At2g28720 PE=1 SV=3	8.46142e-53	69.54	4	F:GO:0004721; P:GO:0006470; F:GO:0016787; F:GO:0046872	F:phosphoprotein phosphatase activity; P:protein dephosphorylation; F:hydrolase activity; F:metal ion binding	IPR000558 (PRINTS); IPR000558 (SMART); IPR009072 (G3DSA:1.10.20.GENE3D); IPR007125 (PFAM); mobidb-lite (MOBIDB_LITE); IPR000558 (PANTHER); PTHR23428:SF230 (PANTHER); IPR000558 (PROSITE_PATTERNS); IPR009072 (SUPERFAMILY)	C:GO:0000786; F:GO:0003677; F:GO:0046982	C:nucleosome; F:DNA binding; F:protein heterodimerization activity	Q9SI96	4.67996e-54	124894	7.29518e-53	28493	2.51703e-84	XP_005843124.1	XP_005843124.1 hypothetical protein CHLNCDRAFT_55388 [Chlorella variabilis]<>XP_005843134.1 hypothetical protein CHLNCDRAFT_28493 [Chlorella variabilis]<>EFN51022.1 hypothetical protein CHLNCDRAFT_55388 [Chlorella variabilis]<>EFN51032.1 hypothetical protein CHLNCDRAFT_28493 [Chlorella variabilis]	554065	2.6e-40	0.219411	0.0487706	0.180074	0.133926	0.144013	0.0547662	NA	NA	NA	NA	NA	NA
NA	OG0000018	14	7	3	g6634	122	Q9SI96	H2B3_ARATH Histone H2B.3 OS=Arabidopsis thaliana OX=3702 GN=At2g28720 PE=1 SV=3	8.46142e-53	69.54	4	F:GO:0004721; P:GO:0006470; F:GO:0016787; F:GO:0046872	F:phosphoprotein phosphatase activity; P:protein dephosphorylation; F:hydrolase activity; F:metal ion binding	IPR000558 (PRINTS); IPR000558 (SMART); IPR009072 (G3DSA:1.10.20.GENE3D); IPR007125 (PFAM); mobidb-lite (MOBIDB_LITE); IPR000558 (PANTHER); PTHR23428:SF230 (PANTHER); IPR000558 (PROSITE_PATTERNS); IPR009072 (SUPERFAMILY)	C:GO:0000786; F:GO:0003677; F:GO:0046982	C:nucleosome; F:DNA binding; F:protein heterodimerization activity	Q9SI96	4.67996e-54	124894	7.29518e-53	28493	2.51703e-84	XP_005843124.1	XP_005843124.1 hypothetical protein CHLNCDRAFT_55388 [Chlorella variabilis]<>XP_005843134.1 hypothetical protein CHLNCDRAFT_28493 [Chlorella variabilis]<>EFN51022.1 hypothetical protein CHLNCDRAFT_55388 [Chlorella variabilis]<>EFN51032.1 hypothetical protein CHLNCDRAFT_28493 [Chlorella variabilis]	554065	2.6e-40	0.658234	0.195082	0.300124	0.0446419	0.432039	0.109532	NA	NA	NA	NA	NA	NA
NA	OG0000018	14	7	3	g9086	125	P05621	H2B2_WHEAT Histone H2B.2 OS=Triticum aestivum OX=4565 PE=1 SV=2	6.77008e-55	83.2	NA	NA	NA	IPR000558 (PRINTS); IPR000558 (SMART); IPR007125 (PFAM); IPR009072 (G3DSA:1.10.20.GENE3D); mobidb-lite (MOBIDB_LITE); mobidb-lite (MOBIDB_LITE); IPR000558 (PANTHER); PTHR23428:SF230 (PANTHER); IPR000558 (PROSITE_PATTERNS); IPR009072 (SUPERFAMILY)	C:GO:0000786; F:GO:0003677; F:GO:0046982	C:nucleosome; F:DNA binding; F:protein heterodimerization activity	Q9SI96	2.37657e-52	124894	9.78592e-53	48411	1.90581e-87	XP_005851845.1	XP_005851845.1 hypothetical protein CHLNCDRAFT_48411 [Chlorella variabilis]<>EFN59743.1 hypothetical protein CHLNCDRAFT_48411 [Chlorella variabilis]	554065	3.4e-43	0.274264	0.390165	0.300124	1.16069	0.144013	1.04056	NA	NA	NA	NA	NA	NA
3	OG0000019	13	6	4	g116	1057	Q8BL06	UBP54_MOUSE Inactive ubiquitin carboxyl-terminal hydrolase 54 OS=Mus musculus OX=10090 GN=Usp54 PE=1 SV=2	1.26251e-24	39.71	NA	NA	NA	Coil (COILS); IPR001394 (PFAM); G3DSA:3.90.70.10 (GENE3D); mobidb-lite (MOBIDB_LITE); mobidb-lite (MOBIDB_LITE); mobidb-lite (MOBIDB_LITE); mobidb-lite (MOBIDB_LITE); mobidb-lite (MOBIDB_LITE); mobidb-lite (MOBIDB_LITE); mobidb-lite (MOBIDB_LITE); PTHR22975 (PANTHER); PTHR22975:SF9 (PANTHER); IPR028889 (PROSITE_PROFILES); cd02257 (CDD); IPR038765 (SUPERFAMILY)	P:GO:0016579; F:GO:0036459	P:protein deubiquitination; F:thiol-dependent ubiquitinyl hydrolase activity	F4JCR1	1.10047e-45	144600	2.60522e-42	143024	0	XP_005849851.1	XP_005849851.1 hypothetical protein CHLNCDRAFT_143024 [Chlorella variabilis]<>EFN57749.1 hypothetical protein CHLNCDRAFT_143024 [Chlorella variabilis]	554065	0	393.185	437.814	741.066	631.013	700.623	469.73	1.17701	0.0242735	NA	NA	NA	NA
NA	OG0000019	13	6	4	g266	525	Q70EL1	UBP54_HUMAN Inactive ubiquitin carboxyl-terminal hydrolase 54 OS=Homo sapiens OX=9606 GN=USP54 PE=1 SV=4	4.62676e-22	43.02	8	P:GO:0015979; F:GO:0016168; P:GO:0018298; C:GO:0033105; F:GO:0042314; C:GO:0046858; F:GO:0046872; P:GO:0055114	P:photosynthesis; F:chlorophyll binding; P:protein-chromophore linkage; C:chlorosome envelope; F:bacteriochlorophyll binding; C:chlorosome; F:metal ion binding; P:oxidation-reduction process	IPR001394 (PFAM); G3DSA:3.90.70.10 (GENE3D); mobidb-lite (MOBIDB_LITE); mobidb-lite (MOBIDB_LITE); mobidb-lite (MOBIDB_LITE); PTHR22975:SF9 (PANTHER); PTHR22975 (PANTHER); IPR028889 (PROSITE_PROFILES); cd02257 (CDD); IPR038765 (SUPERFAMILY)	P:GO:0016579; F:GO:0036459	P:protein deubiquitination; F:thiol-dependent ubiquitinyl hydrolase activity	F4JCR1	1.88559e-45	144600	4.07794e-46	143978	0	XP_005849431.1	XP_005849431.1 hypothetical protein CHLNCDRAFT_143978 [Chlorella variabilis]<>EFN57329.1 hypothetical protein CHLNCDRAFT_143978 [Chlorella variabilis]	554065	3.4e-270	284.906	236.245	296.102	169.014	478.603	196.063	NA	NA	NA	NA	NA	NA
NA	OG0000019	13	6	4	g275	2133	Q8BL06	UBP54_MOUSE Inactive ubiquitin carboxyl-terminal hydrolase 54 OS=Mus musculus OX=10090 GN=Usp54 PE=1 SV=2	5.75259e-16	44.19	NA	NA	NA	Coil (COILS); Coil (COILS); Coil (COILS); G3DSA:3.90.70.10 (GENE3D); IPR001394 (PFAM); G3DSA:3.90.70.10 (GENE3D); mobidb-lite (MOBIDB_LITE); mobidb-lite (MOBIDB_LITE); mobidb-lite (MOBIDB_LITE); mobidb-lite (MOBIDB_LITE); mobidb-lite (MOBIDB_LITE); mobidb-lite (MOBIDB_LITE); mobidb-lite (MOBIDB_LITE); mobidb-lite (MOBIDB_LITE); mobidb-lite (MOBIDB_LITE); mobidb-lite (MOBIDB_LITE); mobidb-lite (MO…	P:GO:0016579; F:GO:0036459	P:protein deubiquitination; F:thiol-dependent ubiquitinyl hydrolase activity	F4JCR1	1.62158e-49	144600	1.78635e-41	21625	4.04657e-108	PRW57909.1	PRW57909.1 ubiquitin carboxyl-terminal hydrolase [Chlorella sorokiniana]	3076	4.6e-132	200.871	202.691	288.419	142.006	208.915	225.911	NA	NA	NA	NA	NA	NA
NA	OG0000019	13	6	4	g278	565	---NA---	---NA---	NA	NA	NA	NA	NA	Coil (COILS); Coil (COILS); mobidb-lite (MOBIDB_LITE); mobidb-lite (MOBIDB_LITE); mobidb-lite (MOBIDB_LITE); mobidb-lite (MOBIDB_LITE); mobidb-lite (MOBIDB_LITE); mobidb-lite (MOBIDB_LITE)	no GO terms	no GO terms	---NA---	NA	---NA---	NA	---NA---	NA	PRW57860.1	PRW57860.1 Inactive ubiquitin carboxyl-terminal hydrolase 54 [Chlorella sorokiniana]	3076	2.1e-47	17.4432	24.8242	13.9257	16.6068	5.90453	12.1581	NA	NA	NA	NA	NA	NA
1	OG0000019	13	6	4	g279	1295	Q8BL06	UBP54_MOUSE Inactive ubiquitin carboxyl-terminal hydrolase 54 OS=Mus musculus OX=10090 GN=Usp54 PE=1 SV=2	2.27685e-24	42.01	NA	NA	NA	Coil (COILS); Coil (COILS); IPR001394 (PFAM); G3DSA:3.90.70.10 (GENE3D); mobidb-lite (MOBIDB_LITE); mobidb-lite (MOBIDB_LITE); mobidb-lite (MOBIDB_LITE); mobidb-lite (MOBIDB_LITE); PTHR22975:SF9 (PANTHER); PTHR22975 (PANTHER); IPR028889 (PROSITE_PROFILES); cd02257 (CDD); IPR038765 (SUPERFAMILY)	P:GO:0016579; F:GO:0036459	P:protein deubiquitination; F:thiol-dependent ubiquitinyl hydrolase activity	F4JCR1	1.38568e-51	144600	5.732e-50	143978	3.34654e-99	PRW57860.1	PRW57860.1 Inactive ubiquitin carboxyl-terminal hydrolase 54 [Chlorella sorokiniana]	3076	1.4e-224	142.288	157.529	70.7092	46.5168	38.2594	55.4782	NA	NA	-1.18827	0.011366	NA	NA
NA	OG0000019	13	6	4	g4701	1883	---NA---	---NA---	NA	NA	NA	NA	NA	Coil (COILS); IPR001394 (PFAM); mobidb-lite (MOBIDB_LITE); mobidb-lite (MOBIDB_LITE); mobidb-lite (MOBIDB_LITE); mobidb-lite (MOBIDB_LITE); mobidb-lite (MOBIDB_LITE); mobidb-lite (MOBIDB_LITE); mobidb-lite (MOBIDB_LITE); mobidb-lite (MOBIDB_LITE); mobidb-lite (MOBIDB_LITE); mobidb-lite (MOBIDB_LITE); mobidb-lite (MOBIDB_LITE); mobidb-lite (MOBIDB_LITE); mobidb-lite (MOBIDB_LITE); PTHR22975 (PANTH…	P:GO:0016579; F:GO:0036459	P:protein deubiquitination; F:thiol-dependent ubiquitinyl hydrolase activity	F4JCR1	5.81064e-53	144600	1.19367e-44	137643	0	XP_005851100.1	XP_005851100.1 hypothetical protein CHLNCDRAFT_137643 [Chlorella variabilis]<>EFN58998.1 hypothetical protein CHLNCDRAFT_137643 [Chlorella variabilis]	554065	0	155.892	154.7	169.33	127.899	154.862	138.832	NA	NA	NA	NA	NA	NA
NA	OG0000020	3	12	8	g10618	480	---NA---	---NA---	NA	NA	NA	NA	NA	IPR005069 (PFAM)	no GO terms	no GO terms	---NA---	NA	184088	5.46545e-08	141019	5.25078e-116	XP_005843495.1	XP_005843495.1 hypothetical protein CHLNCDRAFT_141019 [Chlorella variabilis]<>EFN51393.1 hypothetical protein CHLNCDRAFT_141019 [Chlorella variabilis]	554065	7.5e-123	56.4436	66.328	45.5588	33.7492	44.932	46.4965	NA	NA	NA	NA	NA	NA
NA	OG0000020	3	12	8	g10619	520	---NA---	---NA---	NA	NA	NA	NA	NA	IPR005069 (PFAM); PTHR47032:SF1 (PANTHER); PTHR47032 (PANTHER)	no GO terms	no GO terms	---NA---	NA	338334	1.26329e-11	55152	2.915e-174	XP_005843524.1	XP_005843524.1 hypothetical protein CHLNCDRAFT_55152 [Chlorella variabilis]<>EFN51422.1 hypothetical protein CHLNCDRAFT_55152 [Chlorella variabilis]	554065	6e-134	23.3125	23.4587	22.4493	24.9548	20.5458	30.6691	NA	NA	NA	NA	NA	NA
1	OG0000020	3	12	8	g11345	397	---NA---	---NA---	NA	NA	NA	NA	NA	IPR005069 (PFAM); PTHR47032:SF1 (PANTHER); PTHR47032 (PANTHER)	no GO terms	no GO terms	Q3E6Y3	1.25205e-06	338334	1.5296e-07	133996	0	XP_005847647.1	XP_005847647.1 hypothetical protein CHLNCDRAFT_133996 [Chlorella variabilis]<>EFN55545.1 hypothetical protein CHLNCDRAFT_133996 [Chlorella variabilis]	554065	1.4e-215	57.9794	58.9637	27.9115	8.16946	18.4817	17.3609	-1.33727	0.0240373	-1.20918	0.0437606	NA	NA
3	OG0000020	3	12	8	g1388	436	---NA---	---NA---	NA	NA	NA	NA	NA	IPR005069 (PFAM); PTHR47032:SF1 (PANTHER); PTHR47032 (PANTHER)	no GO terms	no GO terms	Q3E6Y3	7.19802e-06	338334	2.74367e-09	142064	0	XP_005850306.1	XP_005850306.1 expressed protein [Chlorella variabilis]<>EFN58204.1 expressed protein [Chlorella variabilis]	554065	1.7e-254	0.658234	0.292624	24.6702	11.2051	13.2492	6.95531	5.62566	4.62901e-14	4.90911	3.96032e-11	NA	NA
1	OG0000020	3	12	8	g1389	809	---NA---	---NA---	NA	NA	NA	NA	NA	IPR005069 (PFAM); mobidb-lite (MOBIDB_LITE); mobidb-lite (MOBIDB_LITE); PTHR47032:SF1 (PANTHER); PTHR47032 (PANTHER)	no GO terms	no GO terms	---NA---	NA	338334	1.594e-12	142063	0	XP_005850305.1	XP_005850305.1 hypothetical protein CHLNCDRAFT_142063 [Chlorella variabilis]<>EFN58203.1 hypothetical protein CHLNCDRAFT_142063 [Chlorella variabilis]	554065	0	50.4098	53.7452	21.9691	6.56235	12.7691	19.442	-1.50761	0.012435	NA	NA	NA	NA
NA	OG0000020	3	12	8	g4251	441	---NA---	---NA---	NA	NA	NA	NA	NA	IPR005069 (PFAM); PTHR47032:SF1 (PANTHER); PTHR47032 (PANTHER)	no GO terms	no GO terms	---NA---	NA	338334	5.28106e-10	142063	2.47333e-146	XP_005850305.1	XP_005850305.1 hypothetical protein CHLNCDRAFT_142063 [Chlorella variabilis]<>EFN58203.1 hypothetical protein CHLNCDRAFT_142063 [Chlorella variabilis]	554065	1.5e-125	3.8397	3.60902	0.900371	2.54459	1.1041	1.75252	NA	NA	NA	NA	NA	NA
1	OG0000020	3	12	8	g5082	473	---NA---	---NA---	NA	NA	NA	NA	NA	IPR005069 (PFAM)	no GO terms	no GO terms	---NA---	NA	---NA---	NA	142063	1.42435e-149	XP_005850305.1	XP_005850305.1 hypothetical protein CHLNCDRAFT_142063 [Chlorella variabilis]<>EFN58203.1 hypothetical protein CHLNCDRAFT_142063 [Chlorella variabilis]	554065	9.6e-131	70.0471	64.9624	25.4505	18.3478	13.7292	23.7138	-1.18543	0.015825	-1.36293	0.00537391	NA	NA
NA	OG0000020	3	12	8	g5526	717	Q5UNV6	YR699_MIMIV Uncharacterized protein R699 OS=Acanthamoeba polyphaga mimivirus OX=212035 GN=MIMI_R699 PE=4 SV=1	4.75459e-11	44.51	NA	NA	NA	IPR005069 (PFAM); PTHR47032:SF1 (PANTHER); PTHR47032 (PANTHER)	no GO terms	no GO terms	---NA---	NA	338334	2.98709e-09	141183	0	XP_005843312.1	XP_005843312.1 expressed protein [Chlorella variabilis]<>EFN51210.1 expressed protein [Chlorella variabilis]	554065	0	55.182	102.467	49.8205	33.035	22.178	45.7298	NA	NA	NA	NA	NA	NA
NA	OG0000020	3	12	8	g6093	640	---NA---	---NA---	NA	NA	NA	NA	NA	Coil (COILS); IPR005069 (PFAM); mobidb-lite (MOBIDB_LITE); mobidb-lite (MOBIDB_LITE); PTHR47032:SF1 (PANTHER); PTHR47032 (PANTHER); PS51257 (PROSITE_PROFILES)	no GO terms	no GO terms	---NA---	NA	---NA---	NA	139418	2.9573e-124	PRW60973.1	PRW60973.1 exostosin-like glycosyltransferase [Chlorella sorokiniana]	3076	1.4e-113	38.2324	43.796	33.2537	19.6424	46.0841	24.1519	NA	NA	NA	NA	NA	NA
1	OG0000020	3	12	8	g6095	342	---NA---	---NA---	NA	NA	NA	NA	NA	IPR005069 (PFAM)	no GO terms	no GO terms	---NA---	NA	184088	9.19893e-11	145339	0	XP_005847924.1	XP_005847924.1 hypothetical protein CHLNCDRAFT_145339 [Chlorella variabilis]<>EFN55822.1 hypothetical protein CHLNCDRAFT_145339 [Chlorella variabilis]	554065	2.7e-159	34.283	49.2095	19.328	10.1783	8.73678	16.2656	NA	NA	-1.2562	0.0250845	NA	NA
1	OG0000020	3	12	8	g6439	543	---NA---	---NA---	NA	NA	NA	NA	NA	IPR005069 (PFAM); PTHR36081 (PANTHER)	no GO terms	no GO terms	Q9FKX3	5.35368e-23	21996	7.1238e-12	52833	9.73149e-147	XP_005843312.1	XP_005843312.1 expressed protein [Chlorella variabilis]<>EFN51210.1 expressed protein [Chlorella variabilis]	554065	4.8e-118	145.579	167.186	47.7797	24.8655	42.9159	41.239	-1.69973	0.00023323	-1.39836	0.00283585	NA	NA
1	OG0000020	3	12	8	g9957	388	---NA---	---NA---	NA	NA	NA	NA	NA	IPR005069 (PFAM); PTHR47032 (PANTHER); PTHR47032:SF1 (PANTHER)	no GO terms	no GO terms	---NA---	NA	338334	1.51871e-15	139418	0	XP_005844214.1	XP_005844214.1 hypothetical protein CHLNCDRAFT_139418 [Chlorella variabilis]<>EFN52112.1 hypothetical protein CHLNCDRAFT_139418 [Chlorella variabilis]	554065	1.3e-234	30.6627	31.3595	14.4059	9.91049	8.06472	11.008	NA	NA	-1.21078	0.01275	NA	NA
3	OG0000021	5	7	10	g313	643	---NA---	---NA---	NA	NA	NA	NA	NA	Coil (COILS); mobidb-lite (MOBIDB_LITE); mobidb-lite (MOBIDB_LITE); mobidb-lite (MOBIDB_LITE); mobidb-lite (MOBIDB_LITE); mobidb-lite (MOBIDB_LITE)	no GO terms	no GO terms	---NA---	NA	---NA---	NA	136287	8.93241e-112	XP_005845719.1	XP_005845719.1 hypothetical protein CHLNCDRAFT_136287 [Chlorella variabilis]<>EFN53617.1 hypothetical protein CHLNCDRAFT_136287 [Chlorella variabilis]	554065	7.5e-86	83.1569	72.7657	318.851	507.444	384.323	250.501	2.92025	9.61945e-07	2.5286	2.46372e-05	NA	NA
NA	OG0000021	5	7	10	g5327	800	---NA---	---NA---	NA	NA	NA	NA	NA	PR01217 (PRINTS); mobidb-lite (MOBIDB_LITE); mobidb-lite (MOBIDB_LITE); mobidb-lite (MOBIDB_LITE); mobidb-lite (MOBIDB_LITE); mobidb-lite (MOBIDB_LITE); mobidb-lite (MOBIDB_LITE); PTHR23202 (PANTHER)	no GO terms	no GO terms	---NA---	NA	---NA---	NA	137236	0	XP_005845129.1	XP_005845129.1 expressed protein [Chlorella variabilis]<>EFN53027.1 expressed protein [Chlorella variabilis]	554065	3.7e-183	26.3294	32.3349	45.1986	19.4192	44.692	37.2958	NA	NA	NA	NA	NA	NA
NA	OG0000021	5	7	10	g5328	697	---NA---	---NA---	NA	NA	NA	NA	NA	mobidb-lite (MOBIDB_LITE); mobidb-lite (MOBIDB_LITE); mobidb-lite (MOBIDB_LITE); mobidb-lite (MOBIDB_LITE)	no GO terms	no GO terms	---NA---	NA	---NA---	NA	137245	2.93205e-146	XP_005845131.1	XP_005845131.1 hypothetical protein CHLNCDRAFT_137245 [Chlorella variabilis]<>EFN53029.1 hypothetical protein CHLNCDRAFT_137245 [Chlorella variabilis]	554065	3.2e-114	77.6716	110.904	62.6058	24.3745	34.1311	47.8109	NA	NA	NA	NA	NA	NA
2	OG0000021	5	7	10	g5329	719	---NA---	---NA---	NA	NA	NA	NA	NA	PR01217 (PRINTS); mobidb-lite (MOBIDB_LITE); mobidb-lite (MOBIDB_LITE); PS51257 (PROSITE_PROFILES)	no GO terms	no GO terms	---NA---	NA	---NA---	NA	58661	0	XP_005845130.1	XP_005845130.1 expressed protein [Chlorella variabilis]<>EFN53028.1 expressed protein [Chlorella variabilis]	554065	1.2e-249	350.29	397.334	1218.8	1476.26	2268.59	1165.1	2.33757	6.96513e-05	2.70444	5.54118e-06	NA	NA
3	OG0000021	5	7	10	g5330	644	---NA---	---NA---	NA	NA	NA	NA	NA	PR01217 (PRINTS); mobidb-lite (MOBIDB_LITE); mobidb-lite (MOBIDB_LITE); mobidb-lite (MOBIDB_LITE); mobidb-lite (MOBIDB_LITE)	no GO terms	no GO terms	---NA---	NA	---NA---	NA	137245	0	XP_005845131.1	XP_005845131.1 hypothetical protein CHLNCDRAFT_137245 [Chlorella variabilis]<>EFN53029.1 hypothetical protein CHLNCDRAFT_137245 [Chlorella variabilis]	554065	3.8e-231	59.4056	84.6658	174.492	298.029	164.607	157.343	2.23126	0.000126859	1.65414	0.00495428	NA	NA
3	OG0000021	5	7	10	g5527	166	---NA---	---NA---	NA	NA	NA	NA	NA	no IPS match	no IPS match	no IPS match	---NA---	NA	---NA---	NA	137245	7.81467e-27	XP_005845131.1	XP_005845131.1 hypothetical protein CHLNCDRAFT_137245 [Chlorella variabilis]<>EFN53029.1 hypothetical protein CHLNCDRAFT_137245 [Chlorella variabilis]	554065	1.5e-17	33.2408	14.3386	124.972	250.709	64.8058	75.7417	3.51956	4.21954e-07	2.06065	0.00275937	NA	NA
3	OG0000021	5	7	10	g5528	380	---NA---	---NA---	NA	NA	NA	NA	NA	mobidb-lite (MOBIDB_LITE)	no GO terms	no GO terms	---NA---	NA	---NA---	NA	137245	3.45196e-92	XP_005845131.1	XP_005845131.1 hypothetical protein CHLNCDRAFT_137245 [Chlorella variabilis]<>EFN53029.1 hypothetical protein CHLNCDRAFT_137245 [Chlorella variabilis]	554065	1.2e-70	92.427	34.6759	263.629	439.008	179.104	175.964	2.99004	1.38559e-05	1.98357	0.00399754	NA	NA
NA	OG0000022	5	10	7	g10101	554	---NA---	---NA---	NA	NA	NA	NA	NA	IPR024535 (PFAM); IPR012334 (G3DSA:2.160.20.GENE3D); mobidb-lite (MOBIDB_LITE); mobidb-lite (MOBIDB_LITE); IPR011050 (SUPERFAMILY)	no GO terms	no GO terms	---NA---	NA	---NA---	NA	144516	3.00249e-116	XP_005850760.1	XP_005850760.1 hypothetical protein CHLNCDRAFT_140926 [Chlorella variabilis]<>EFN58658.1 hypothetical protein CHLNCDRAFT_140926 [Chlorella variabilis]	554065	1.3e-142	0.219411	0.292624	0.240099	0.0446419	0.768069	0.164299	NA	NA	NA	NA	NA	NA
NA	OG0000022	5	10	7	g10103	432	---NA---	---NA---	NA	NA	NA	NA	NA	IPR024535 (PFAM); IPR012334 (G3DSA:2.160.20.GENE3D); IPR011050 (SUPERFAMILY)	no GO terms	no GO terms	---NA---	NA	---NA---	NA	145493	1.84002e-90	PSC69036.1	PSC69036.1 band 7 [Micractinium conductrix]	554055	1.5e-82	9.10557	4.63321	1.26052	6.47307	2.83225	1.58822	NA	NA	NA	NA	NA	NA
3	OG0000022	5	10	7	g10106	856	D4B0V1	E13B_ARTBC Probable glucan endo-1,3-beta-glucosidase ARB_02077 OS=Arthroderma benhamiae (strain ATCC MYA-4681 / CBS 112371) OX=663331 GN=ARB_02077 PE=1 SV=1	1.05013e-07	61.54	NA	NA	NA	IPR012334 (G3DSA:2.160.20.GENE3D); IPR024535 (PFAM); IPR012334 (G3DSA:2.160.20.GENE3D); mobidb-lite (MOBIDB_LITE); mobidb-lite (MOBIDB_LITE); mobidb-lite (MOBIDB_LITE); mobidb-lite (MOBIDB_LITE); mobidb-lite (MOBIDB_LITE); mobidb-lite (MOBIDB_LITE); mobidb-lite (MOBIDB_LITE); PTHR31375 (PANTHER); PTHR31375:SF53 (PANTHER); IPR001969 (PROSITE_PATTERNS); IPR011050 (SUPERFAMILY)	F:GO:0004190; P:GO:0006508	F:aspartic-type endopeptidase activity; P:proteolysis	---NA---	NA	---NA---	NA	140922	0	XP_005851040.1	XP_005851040.1 hypothetical protein CHLNCDRAFT_140922, partial [Chlorella variabilis]<>EFN58938.1 hypothetical protein CHLNCDRAFT_140922, partial [Chlorella variabilis]	554065	1.2e-166	18.5403	25.4095	82.7741	243.164	93.1764	85.7639	3.45089	2.43934e-06	2.52007	0.000535264	NA	NA
2	OG0000022	5	10	7	g5713	1375	---NA---	---NA---	NA	NA	NA	NA	NA	Coil (COILS); PR01217 (PRINTS); IPR000177 (SMART); IPR012334 (G3DSA:2.160.20.GENE3D); G3DSA:3.50.4.10 (GENE3D); IPR003609 (PFAM); IPR024535 (PFAM); G3DSA:3.50.4.10 (GENE3D); mobidb-lite (MOBIDB_LITE); mobidb-lite (MOBIDB_LITE); mobidb-lite (MOBIDB_LITE); mobidb-lite (MOBIDB_LITE); mobidb-lite (MOBIDB_LITE); mobidb-lite (MOBIDB_LITE); mobidb-lite (MOBIDB_LITE); mobidb-lite (MOBIDB_LITE); mobidb-li…	F:GO:0005515; C:GO:0005576; P:GO:0006508	F:protein binding; C:extracellular region; P:proteolysis	---NA---	NA	---NA---	NA	140001	0	XP_005843711.1	XP_005843711.1 hypothetical protein CHLNCDRAFT_140001, partial [Chlorella variabilis]<>EFN51609.1 hypothetical protein CHLNCDRAFT_140001, partial [Chlorella variabilis]	554065	0	323.632	208.494	565.793	691.681	529.248	614.532	1.73261	0.00141326	1.59986	0.00349193	NA	NA
3	OG0000022	5	10	7	g5949	738	---NA---	---NA---	NA	NA	NA	NA	NA	PR01217 (PRINTS); IPR024535 (PFAM); IPR012334 (G3DSA:2.160.20.GENE3D); mobidb-lite (MOBIDB_LITE); mobidb-lite (MOBIDB_LITE); PTHR23202 (PANTHER); IPR011050 (SUPERFAMILY)	no GO terms	no GO terms	---NA---	NA	---NA---	NA	145493	0	XP_005848147.1	XP_005848147.1 hypothetical protein CHLNCDRAFT_145493 [Chlorella variabilis]<>EFN56045.1 hypothetical protein CHLNCDRAFT_145493 [Chlorella variabilis]	554065	0	12.0128	13.607	51.8614	114.551	30.9148	43.6487	3.23927	2.73648e-07	2.02974	0.00123701	NA	NA
NA	OG0000022	5	10	7	g6383	621	---NA---	---NA---	NA	NA	NA	NA	NA	IPR012334 (G3DSA:2.160.20.GENE3D); IPR024535 (PFAM); IPR011050 (SUPERFAMILY); IPR011050 (SUPERFAMILY)	no GO terms	no GO terms	O23147	7.20306e-06	---NA---	NA	58107	0	XP_005847190.1	XP_005847190.1 hypothetical protein CHLNCDRAFT_58107 [Chlorella variabilis]<>EFN55088.1 hypothetical protein CHLNCDRAFT_58107 [Chlorella variabilis]	554065	0	397.409	335.688	164.408	144.238	336.27	152.305	NA	NA	NA	NA	NA	NA
3	OG0000022	5	10	7	g8767	579	---NA---	---NA---	NA	NA	NA	NA	NA	IPR012334 (G3DSA:2.160.20.GENE3D); IPR024535 (PFAM); mobidb-lite (MOBIDB_LITE); mobidb-lite (MOBIDB_LITE); mobidb-lite (MOBIDB_LITE); IPR011050 (SUPERFAMILY)	no GO terms	no GO terms	---NA---	NA	---NA---	NA	144516	0	XP_005848978.1	XP_005848978.1 hypothetical protein CHLNCDRAFT_144516 [Chlorella variabilis]<>EFN56876.1 hypothetical protein CHLNCDRAFT_144516 [Chlorella variabilis]	554065	2.3e-283	0.493676	0	1.86077	2.18745	0.67206	0.931026	3.52414	0.000617857	2.19661	0.0428917	NA	NA
1	OG0000022	5	10	7	g9176	680	---NA---	---NA---	NA	NA	NA	NA	NA	IPR024535 (PFAM); IPR012334 (G3DSA:2.160.20.GENE3D); mobidb-lite (MOBIDB_LITE); mobidb-lite (MOBIDB_LITE); PTHR23202 (PANTHER); IPR011050 (SUPERFAMILY)	no GO terms	no GO terms	---NA---	NA	---NA---	NA	133254	0	XP_005852139.1	XP_005852139.1 hypothetical protein CHLNCDRAFT_133254 [Chlorella variabilis]<>EFN60037.1 hypothetical protein CHLNCDRAFT_133254 [Chlorella variabilis]	554065	6.2e-248	21.5572	25.8972	5.94245	6.78556	11.521	12.3772	-1.41592	0.00609373	NA	NA	NA	NA
NA	OG0000022	5	10	7	g9188	663	---NA---	---NA---	NA	NA	NA	NA	NA	IPR024535 (PFAM); IPR012334 (G3DSA:2.160.20.GENE3D); mobidb-lite (MOBIDB_LITE); mobidb-lite (MOBIDB_LITE); PTHR23202 (PANTHER); IPR011050 (SUPERFAMILY)	no GO terms	no GO terms	---NA---	NA	---NA---	NA	133242	0	XP_005851799.1	XP_005851799.1 hypothetical protein CHLNCDRAFT_133242 [Chlorella variabilis]<>EFN59697.1 hypothetical protein CHLNCDRAFT_133242 [Chlorella variabilis]	554065	1.6e-264	41.5784	48.3317	26.5309	30.535	61.7815	30.1762	NA	NA	NA	NA	NA	NA
3	OG0000022	5	10	7	g9775	639	---NA---	---NA---	NA	NA	NA	NA	NA	IPR024535 (PFAM); IPR012334 (G3DSA:2.160.20.GENE3D); mobidb-lite (MOBIDB_LITE); IPR011050 (SUPERFAMILY)	no GO terms	no GO terms	---NA---	NA	---NA---	NA	58775	0	XP_005845016.1	XP_005845016.1 hypothetical protein CHLNCDRAFT_58775 [Chlorella variabilis]<>EFN52914.1 hypothetical protein CHLNCDRAFT_58775 [Chlorella variabilis]	554065	4.9e-295	72.296	117.635	143.279	187.451	131.1	89.1594	1.29288	0.0250562	NA	NA	NA	NA
1	OG0000023	17	3	2	g3510	404	O97397	CATLL_PHACE Cathepsin L-like proteinase OS=Phaedon cochleariae OX=80249 PE=2 SV=1	2.37583e-47	48.2	NA	NA	NA	IPR000668 (PRINTS); IPR000668 (SMART); IPR013201 (SMART); G3DSA:3.90.70.10 (GENE3D); IPR013201 (PFAM); IPR000668 (PFAM); mobidb-lite (MOBIDB_LITE); mobidb-lite (MOBIDB_LITE); mobidb-lite (MOBIDB_LITE); PTHR12411 (PANTHER); PTHR12411:SF586 (PANTHER); IPR000169 (PROSITE_PATTERNS); IPR039417 (CDD); IPR038765 (SUPERFAMILY)	P:GO:0006508; F:GO:0008234	P:proteolysis; F:cysteine-type peptidase activity	Q9LT77	5.73211e-46	206048	4.08024e-37	132900	0	XP_005851991.1	XP_005851991.1 hypothetical protein CHLNCDRAFT_132900 [Chlorella variabilis]<>EFN59889.1 hypothetical protein CHLNCDRAFT_132900 [Chlorella variabilis]	554065	7.3e-188	26.6036	14.2898	4.20173	2.81244	4.65642	3.8884	-2.10683	0.000326234	-1.75406	0.00294028	NA	NA
1	OG0000023	17	3	2	g9240	587	---NA---	---NA---	NA	NA	NA	NA	NA	Coil (COILS); Coil (COILS); Coil (COILS); mobidb-lite (MOBIDB_LITE); mobidb-lite (MOBIDB_LITE); mobidb-lite (MOBIDB_LITE); mobidb-lite (MOBIDB_LITE); mobidb-lite (MOBIDB_LITE); mobidb-lite (MOBIDB_LITE)	no GO terms	no GO terms	---NA---	NA	---NA---	NA	133188	0	XP_005851776.1	XP_005851776.1 hypothetical protein CHLNCDRAFT_133188 [Chlorella variabilis]<>EFN59674.1 hypothetical protein CHLNCDRAFT_133188 [Chlorella variabilis]	554065	1e-235	1.15191	0.975412	0.180074	0	0.0480043	0	-3.22072	0.0028183	-4.60759	0.000281088	NA	NA
NA	OG0000023	17	3	2	g9242	279	---NA---	---NA---	NA	NA	NA	NA	NA	Coil (COILS); mobidb-lite (MOBIDB_LITE); mobidb-lite (MOBIDB_LITE)	no GO terms	no GO terms	---NA---	NA	---NA---	NA	---NA---	NA	PSC74282.1	PSC74282.1 hypothetical protein C2E20_2654 [Micractinium conductrix]	554055	1e-26	29.456	37.2607	15.1863	11.8301	13.9693	14.1844	NA	NA	NA	NA	NA	NA
NA	OG0000024	7	13	2	g10359	1225	Q4LDE5	SVEP1_HUMAN Sushi, von Willebrand factor type A, EGF and pentraxin domain-containing protein 1 OS=Homo sapiens OX=9606 GN=SVEP1 PE=1 SV=3	2.35656e-07	42.28	6	F:GO:0003779; C:GO:0005737; C:GO:0005856; F:GO:0046872; F:GO:0051015; P:GO:0051693	F:actin binding; C:cytoplasm; C:cytoskeleton; F:metal ion binding; F:actin filament binding; P:actin filament capping	IPR006212 (SMART); IPR001368 (SMART); IPR011641 (SMART); IPR011658 (SMART); G3DSA:2.10.50.10 (GENE3D); IPR011641 (PFAM); G3DSA:3.90.182.10 (GENE3D); G3DSA:2.10.50.10 (GENE3D); IPR011658 (PFAM); PTHR46967 (PANTHER); IPR037524 (PROSITE_PROFILES); IPR009030 (SUPERFAMILY); IPR009030 (SUPERFAMILY); SSF56988 (SUPERFAMILY); IPR009030 (SUPERFAMILY)	F:GO:0005515	F:protein binding	---NA---	NA	423349	2.01887e-32	143325	0	XP_005849706.1	XP_005849706.1 hypothetical protein CHLNCDRAFT_143325 [Chlorella variabilis]<>EFN57604.1 hypothetical protein CHLNCDRAFT_143325 [Chlorella variabilis]	554065	0	76.7391	42.1866	66.0873	39.642	54.3409	54.8757	NA	NA	NA	NA	NA	NA
NA	OG0000024	7	13	2	g1832	1173	---NA---	---NA---	NA	NA	NA	NA	NA	PR01217 (PRINTS); IPR011641 (SMART); G3DSA:2.10.50.10 (GENE3D); IPR011641 (PFAM); mobidb-lite (MOBIDB_LITE); mobidb-lite (MOBIDB_LITE); mobidb-lite (MOBIDB_LITE); mobidb-lite (MOBIDB_LITE); PTHR46967 (PANTHER); IPR009030 (SUPERFAMILY); IPR009030 (SUPERFAMILY); IPR009030 (SUPERFAMILY)	no GO terms	no GO terms	---NA---	NA	423349	1.10466e-22	142476	2.57951e-173	PRW39252.1	PRW39252.1 hypothetical protein C2E21_6903 [Chlorella sorokiniana]	3076	2.5e-71	131.263	76.4723	60.0248	35.5796	110.122	62.9264	NA	NA	NA	NA	NA	NA
NA	OG0000024	7	13	2	g1943	365	---NA---	---NA---	NA	NA	NA	NA	NA	PR01217 (PRINTS); mobidb-lite (MOBIDB_LITE); mobidb-lite (MOBIDB_LITE); PS51257 (PROSITE_PROFILES)	no GO terms	no GO terms	---NA---	NA	---NA---	NA	139207	2.57344e-16	PRW39252.1	PRW39252.1 hypothetical protein C2E21_6903 [Chlorella sorokiniana]	3076	5.8e-35	1.20676	0.975412	0.660272	1.87496	0.960086	1.64299	NA	NA	NA	NA	NA	NA
NA	OG0000024	7	13	2	g2	103	A3DC75	RSGI3_CLOTH Anti-sigma-I factor RsgI3 OS=Clostridium thermocellum (strain ATCC 27405 / DSM 1237 / NBRC 103400 / NCIMB 10682 / NRRL B-4536 / VPI 7372) OX=203119 GN=rsgI3 PE=2 SV=1	3.01228e-07	50.52	NA	NA	NA	IPR011658 (SMART); IPR011658 (PFAM); G3DSA:2.60.120.380 (GENE3D); IPR037524 (PROSITE_PROFILES); SSF56988 (SUPERFAMILY)	no GO terms	no GO terms	---NA---	NA	---NA---	NA	136616	1.27374e-20	PHS17679.1	PHS17679.1 dehydrogenase [Blastopirellula sp.]	2024826	3.9e-21	0	0	0	0	0	0	NA	NA	NA	NA	NA	NA
1	OG0000024	7	13	2	g2056	1315	Q05212	DR102_ARATH DNA damage-repair/toleration protein DRT102 OS=Arabidopsis thaliana OX=3702 GN=DRT102 PE=1 SV=2	6.50736e-19	54.22	NA	NA	NA	PR01217 (PRINTS); IPR011641 (SMART); IPR011658 (SMART); G3DSA:2.10.50.10 (GENE3D); G3DSA:2.60.120.380 (GENE3D); IPR011641 (PFAM); IPR036569 (G3DSA:3.40.1400.GENE3D); IPR011658 (PFAM); IPR003500 (PFAM); mobidb-lite (MOBIDB_LITE); PTHR46967 (PANTHER); IPR037524 (PROSITE_PROFILES); IPR037524 (PROSITE_PROFILES); IPR009030 (SUPERFAMILY); IPR009030 (SUPERFAMILY); IPR036569 (SUPERFAMILY); IPR009030 (SUP…	P:GO:0005975; F:GO:0016853	P:carbohydrate metabolic process; F:isomerase activity	Q05212	3.59919e-20	423349	2.04623e-29	136616	0	XP_005845519.1	XP_005845519.1 hypothetical protein CHLNCDRAFT_136616 [Chlorella variabilis]<>EFN53417.1 hypothetical protein CHLNCDRAFT_136616 [Chlorella variabilis]	554065	1.8e-219	55.5659	35.505	20.9486	13.2586	14.9773	17.6895	-0.984135	0.0477661	-0.98317	0.0493321	NA	NA
1	OG0000024	7	13	2	g2404	810	Q4LDE5	SVEP1_HUMAN Sushi, von Willebrand factor type A, EGF and pentraxin domain-containing protein 1 OS=Homo sapiens OX=9606 GN=SVEP1 PE=1 SV=3	1.85941e-09	45.57	6	F:GO:0003779; C:GO:0005737; C:GO:0005856; F:GO:0046872; F:GO:0051015; P:GO:0051693	F:actin binding; C:cytoplasm; C:cytoskeleton; F:metal ion binding; F:actin filament binding; P:actin filament capping	IPR011641 (SMART); IPR006212 (SMART); G3DSA:2.10.50.10 (GENE3D); G3DSA:2.10.50.10 (GENE3D); IPR011641 (PFAM); PTHR46967 (PANTHER); PS51257 (PROSITE_PROFILES); IPR009030 (SUPERFAMILY); IPR009030 (SUPERFAMILY); IPR009030 (SUPERFAMILY)	no GO terms	no GO terms	---NA---	NA	343813	3.38739e-23	55572	0	XP_005842870.1	XP_005842870.1 hypothetical protein CHLNCDRAFT_55572 [Chlorella variabilis]<>EFN50758.1 hypothetical protein CHLNCDRAFT_55572 [Chlorella variabilis]	554065	2.9e-228	38.2324	23.8976	1.50062	0.937479	1.1041	1.53345	-4.23808	1.48361e-12	-4.06118	1.1168e-11	NA	NA
1	OG0000024	7	13	2	g2407	910	Q6NZL8	SCUB1_MOUSE Signal peptide, CUB and EGF-like domain-containing protein 1 OS=Mus musculus OX=10090 GN=Scube1 PE=2 SV=2	4.23532e-09	43.72	NA	NA	NA	IPR011641 (SMART); IPR006212 (SMART); G3DSA:2.10.50.10 (GENE3D); IPR011641 (PFAM); G3DSA:2.10.50.10 (GENE3D); PTHR46967 (PANTHER); IPR009030 (SUPERFAMILY); IPR009030 (SUPERFAMILY); IPR009030 (SUPERFAMILY)	no GO terms	no GO terms	---NA---	NA	343813	2.51418e-27	142476	0	XP_005842883.1	XP_005842883.1 hypothetical protein CHLNCDRAFT_142476 [Chlorella variabilis]<>EFN50771.1 hypothetical protein CHLNCDRAFT_142476 [Chlorella variabilis]	554065	1.9e-127	15.0845	1.60943	0.12005	0.0892837	0.0960086	0.164299	-5.78878	1.7987e-05	-5.45231	4.47581e-05	NA	NA
1	OG0000024	7	13	2	g2408	1016	Q9NQ36	SCUB2_HUMAN Signal peptide, CUB and EGF-like domain-containing protein 2 OS=Homo sapiens OX=9606 GN=SCUBE2 PE=1 SV=3	2.71267e-13	44.74	NA	NA	NA	IPR006212 (SMART); IPR011641 (SMART); G3DSA:2.10.50.10 (GENE3D); IPR011641 (PFAM); PTHR46104:SF1 (PANTHER); PTHR46104 (PANTHER); PTHR46104 (PANTHER); PTHR46104:SF1 (PANTHER); PTHR46104:SF1 (PANTHER); PTHR46104:SF1 (PANTHER); PTHR46104 (PANTHER); PTHR46104 (PANTHER); PS51257 (PROSITE_PROFILES); IPR009030 (SUPERFAMILY); IPR009030 (SUPERFAMILY); IPR009030 (SUPERFAMILY); IPR009030 (SUPERFAMILY)	no GO terms	no GO terms	---NA---	NA	343813	6.75237e-36	142476	0	XP_005842883.1	XP_005842883.1 hypothetical protein CHLNCDRAFT_142476 [Chlorella variabilis]<>EFN50771.1 hypothetical protein CHLNCDRAFT_142476 [Chlorella variabilis]	554065	8.1e-244	16.9495	2.63361	1.50062	0.758912	2.01618	1.09532	-2.69522	0.00810784	-2.13314	0.0359379	NA	NA
NA	OG0000024	7	13	2	g2410	1016	Q9NQ36	SCUB2_HUMAN Signal peptide, CUB and EGF-like domain-containing protein 2 OS=Homo sapiens OX=9606 GN=SCUBE2 PE=1 SV=3	2.71267e-13	44.74	NA	NA	NA	IPR006212 (SMART); IPR011641 (SMART); G3DSA:2.10.50.10 (GENE3D); G3DSA:2.10.50.10 (GENE3D); IPR011641 (PFAM); PTHR46967 (PANTHER); PS51257 (PROSITE_PROFILES); IPR009030 (SUPERFAMILY); IPR009030 (SUPERFAMILY); IPR009030 (SUPERFAMILY); IPR009030 (SUPERFAMILY)	no GO terms	no GO terms	---NA---	NA	343813	3.06399e-36	142476	0	XP_005842883.1	XP_005842883.1 hypothetical protein CHLNCDRAFT_142476 [Chlorella variabilis]<>EFN50771.1 hypothetical protein CHLNCDRAFT_142476 [Chlorella variabilis]	554065	3e-246	44.1017	22.3857	22.6894	7.18734	13.5852	9.85792	NA	NA	NA	NA	NA	NA
3	OG0000024	7	13	2	g2417	1029	Q5G872	SCUB2_DANRE Signal peptide, CUB and EGF-like domain-containing protein 2 OS=Danio rerio OX=7955 GN=scube2 PE=2 SV=1	1.91069e-10	44.65	NA	NA	NA	IPR011641 (SMART); IPR006212 (SMART); G3DSA:2.10.50.10 (GENE3D); G3DSA:2.10.50.10 (GENE3D); IPR011641 (PFAM); PTHR46967 (PANTHER); IPR009030 (SUPERFAMILY); IPR009030 (SUPERFAMILY); IPR009030 (SUPERFAMILY); IPR009030 (SUPERFAMILY)	no GO terms	no GO terms	---NA---	NA	343813	4.06999e-36	141584	0	XP_005843036.1	XP_005843036.1 hypothetical protein CHLNCDRAFT_141584 [Chlorella variabilis]<>EFN50934.1 hypothetical protein CHLNCDRAFT_141584 [Chlorella variabilis]	554065	5.4e-280	38.8907	33.0665	76.5916	57.6773	65.9099	57.6141	1.34306	0.00235809	1.27835	0.00410827	NA	NA
1	OG0000024	7	13	2	g2934	1012	Q9NQ36	SCUB2_HUMAN Signal peptide, CUB and EGF-like domain-containing protein 2 OS=Homo sapiens OX=9606 GN=SCUBE2 PE=1 SV=3	1.52453e-11	44.09	NA	NA	NA	IPR011641 (SMART); IPR006212 (SMART); IPR011641 (PFAM); G3DSA:2.10.50.10 (GENE3D); G3DSA:2.10.50.10 (GENE3D); PTHR46967 (PANTHER); PS51257 (PROSITE_PROFILES); IPR009030 (SUPERFAMILY); IPR009030 (SUPERFAMILY); IPR009030 (SUPERFAMILY); IPR009030 (SUPERFAMILY)	no GO terms	no GO terms	---NA---	NA	343813	4.87634e-35	145099	0	XP_005848360.1	XP_005848360.1 hypothetical protein CHLNCDRAFT_145099 [Chlorella variabilis]<>EFN56258.1 hypothetical protein CHLNCDRAFT_145099 [Chlorella variabilis]	554065	1.6e-252	18.8694	2.68238	2.82116	1.87496	0.816073	1.42392	NA	NA	-2.76522	0.00644492	NA	NA
2	OG0000024	7	13	2	g3265	959	Q6NZL8	SCUB1_MOUSE Signal peptide, CUB and EGF-like domain-containing protein 1 OS=Mus musculus OX=10090 GN=Scube1 PE=2 SV=2	9.47677e-08	37.62	NA	NA	NA	IPR011658 (SMART); IPR011641 (SMART); IPR011658 (PFAM); IPR011641 (PFAM); G3DSA:2.10.50.10 (GENE3D); G3DSA:3.90.182.10 (GENE3D); G3DSA:2.60.120.380 (GENE3D); PTHR46967 (PANTHER); IPR037524 (PROSITE_PROFILES); IPR037524 (PROSITE_PROFILES); IPR009030 (SUPERFAMILY); IPR009030 (SUPERFAMILY); SSF56988 (SUPERFAMILY); SSF56988 (SUPERFAMILY); IPR009030 (SUPERFAMILY); IPR009030 (SUPERFAMILY)	no GO terms	no GO terms	---NA---	NA	423349	1.97629e-19	55572	0	XP_005845519.1	XP_005845519.1 hypothetical protein CHLNCDRAFT_136616 [Chlorella variabilis]<>EFN53417.1 hypothetical protein CHLNCDRAFT_136616 [Chlorella variabilis]	554065	2.6e-42	385.67	330.616	544.124	544.452	711.616	463.76	1.07476	0.0473952	1.2178	0.024063	NA	NA
2	OG0000024	7	13	2	g3266	1030	Q9NQ36	SCUB2_HUMAN Signal peptide, CUB and EGF-like domain-containing protein 2 OS=Homo sapiens OX=9606 GN=SCUBE2 PE=1 SV=3	3.20396e-09	44.26	NA	NA	NA	IPR011641 (SMART); IPR011658 (SMART); IPR001368 (SMART); G3DSA:2.10.50.10 (GENE3D); G3DSA:2.60.120.380 (GENE3D); IPR011641 (PFAM); G3DSA:2.10.50.10 (GENE3D); IPR011658 (PFAM); PTHR46104:SF1 (PANTHER); PTHR46104 (PANTHER); PTHR46104 (PANTHER); PTHR46104 (PANTHER); PTHR46104:SF1 (PANTHER); PTHR46104:SF1 (PANTHER); IPR037524 (PROSITE_PROFILES); IPR037524 (PROSITE_PROFILES); SSF56988 (SUPERFAMILY); I…	F:GO:0005515	F:protein binding	---NA---	NA	423349	9.44432e-23	145099	0	XP_005845519.1	XP_005845519.1 hypothetical protein CHLNCDRAFT_136616 [Chlorella variabilis]<>EFN53417.1 hypothetical protein CHLNCDRAFT_136616 [Chlorella variabilis]	554065	6.2e-50	59.5702	44.6251	64.7667	61.4272	99.4169	60.681	NA	NA	1.12485	0.0291373	NA	NA
3	OG0000025	6	8	8	g3540	163	---NA---	---NA---	NA	NA	NA	NA	NA	mobidb-lite (MOBIDB_LITE); mobidb-lite (MOBIDB_LITE); mobidb-lite (MOBIDB_LITE)	no GO terms	no GO terms	---NA---	NA	---NA---	NA	132866	8.55653e-40	XP_005851975.1	XP_005851975.1 hypothetical protein CHLNCDRAFT_132866 [Chlorella variabilis]<>EFN59873.1 hypothetical protein CHLNCDRAFT_132866 [Chlorella variabilis]	554065	1.6e-16	11.19	6.34018	21.789	465.168	44.836	182.536	5.43527	0.0031677	4.17563	0.0188771	NA	NA
3	OG0000025	6	8	8	g3541	276	---NA---	---NA---	NA	NA	NA	NA	NA	mobidb-lite (MOBIDB_LITE); mobidb-lite (MOBIDB_LITE); mobidb-lite (MOBIDB_LITE)	no GO terms	no GO terms	---NA---	NA	---NA---	NA	132866	3.24882e-104	NA	NA	NA	NA	60.1187	79.5449	112.486	200.933	130.38	147.65	1.68818	0.00367398	1.48511	0.0114467	NA	NA
NA	OG0000025	6	8	8	g5386	845	---NA---	---NA---	NA	NA	NA	NA	NA	Coil (COILS); mobidb-lite (MOBIDB_LITE); mobidb-lite (MOBIDB_LITE); mobidb-lite (MOBIDB_LITE); mobidb-lite (MOBIDB_LITE); mobidb-lite (MOBIDB_LITE); mobidb-lite (MOBIDB_LITE); mobidb-lite (MOBIDB_LITE); mobidb-lite (MOBIDB_LITE); mobidb-lite (MOBIDB_LITE); mobidb-lite (MOBIDB_LITE); mobidb-lite (MOBIDB_LITE)	no GO terms	no GO terms	---NA---	NA	---NA---	NA	57018	0	XP_005850249.1	XP_005850249.1 expressed protein [Chlorella variabilis]<>EFN58147.1 expressed protein [Chlorella variabilis]	554065	8.4e-170	100.106	135.631	93.3985	261.289	78.391	137.573	NA	NA	NA	NA	NA	NA
3	OG0000025	6	8	8	g7713	212	---NA---	---NA---	NA	NA	NA	NA	NA	mobidb-lite (MOBIDB_LITE); mobidb-lite (MOBIDB_LITE); mobidb-lite (MOBIDB_LITE); mobidb-lite (MOBIDB_LITE); mobidb-lite (MOBIDB_LITE); mobidb-lite (MOBIDB_LITE)	no GO terms	no GO terms	---NA---	NA	---NA---	NA	132866	8.45272e-39	NA	NA	NA	NA	7.56969	4.73075	25.6906	132.676	10.705	77.9871	4.28359	0.00373472	3.32266	0.0221287	NA	NA
3	OG0000025	6	8	8	g876	258	P69328	AMYG_ASPNG Glucoamylase OS=Aspergillus niger OX=5061 GN=GLAA PE=1 SV=1	1.76569e-10	52.17	NA	NA	NA	IPR002044 (SMART); IPR002044 (PFAM); IPR013783 (G3DSA:2.60.40.GENE3D); mobidb-lite (MOBIDB_LITE); mobidb-lite (MOBIDB_LITE); PTHR15048 (PANTHER); IPR002044 (PROSITE_PROFILES); cd05467 (CDD); IPR013784 (SUPERFAMILY)	F:GO:0030246; F:GO:2001070	F:carbohydrate binding; F:starch binding	Q9LFB0	3.75299e-10	150073	8.23158e-15	139625	1.45643e-162	XP_005844056.1	XP_005844056.1 hypothetical protein CHLNCDRAFT_139625 [Chlorella variabilis]<>EFN51954.1 hypothetical protein CHLNCDRAFT_139625 [Chlorella variabilis]	554065	1.4e-83	2.85235	2.38976	23.4697	4.77668	9.50485	4.87419	2.76246	0.000663663	1.96071	0.0168406	NA	NA
NA	OG0000025	6	8	8	g8766	478	---NA---	---NA---	NA	NA	NA	NA	NA	IPR002044 (SMART); IPR013783 (G3DSA:2.60.40.GENE3D); IPR002044 (PFAM); mobidb-lite (MOBIDB_LITE); mobidb-lite (MOBIDB_LITE); mobidb-lite (MOBIDB_LITE); mobidb-lite (MOBIDB_LITE); PTHR15048 (PANTHER); IPR002044 (PROSITE_PROFILES); cd05467 (CDD); IPR013784 (SUPERFAMILY)	F:GO:0030246; F:GO:2001070	F:carbohydrate binding; F:starch binding	Q9LFB0	7.66072e-09	205673	2.48658e-07	144517	0	XP_005848767.1	XP_005848767.1 hypothetical protein CHLNCDRAFT_144517 [Chlorella variabilis]<>EFN56665.1 hypothetical protein CHLNCDRAFT_144517 [Chlorella variabilis]	554065	2.8e-146	0	0	0.0600248	0	0.0480043	0	NA	NA	NA	NA	NA	NA
3	OG0000025	6	8	8	g877	547	P36914	AMYG_ASPOR Glucoamylase OS=Aspergillus oryzae (strain ATCC 42149 / RIB 40) OX=510516 GN=glaA PE=2 SV=2	1.51911e-06	50.57	NA	NA	NA	IPR002044 (SMART); IPR002044 (PFAM); IPR013783 (G3DSA:2.60.40.GENE3D); mobidb-lite (MOBIDB_LITE); mobidb-lite (MOBIDB_LITE); mobidb-lite (MOBIDB_LITE); mobidb-lite (MOBIDB_LITE); mobidb-lite (MOBIDB_LITE); mobidb-lite (MOBIDB_LITE); PTHR15048:SF0 (PANTHER); PTHR15048 (PANTHER); IPR002044 (PROSITE_PROFILES); cd05467 (CDD); IPR013784 (SUPERFAMILY)	F:GO:0030246; F:GO:2001070	F:carbohydrate binding; F:starch binding	Q9LFB0	1.02971e-06	403088	2.4827e-14	139626	0	XP_005844057.1	XP_005844057.1 hypothetical protein CHLNCDRAFT_139626 [Chlorella variabilis]<>EFN51955.1 hypothetical protein CHLNCDRAFT_139626 [Chlorella variabilis]	554065	1.3e-155	93.8532	91.3961	73.8905	1072.92	97.8328	526.741	3.26047	0.0485799	NA	NA	NA	NA
NA	OG0000025	6	8	8	g9805	439	---NA---	---NA---	NA	NA	NA	NA	NA	IPR002044 (SMART); IPR002044 (PFAM); IPR013783 (G3DSA:2.60.40.GENE3D); mobidb-lite (MOBIDB_LITE); mobidb-lite (MOBIDB_LITE); mobidb-lite (MOBIDB_LITE); PTHR15048 (PANTHER); IPR002044 (PROSITE_PROFILES); cd05467 (CDD); IPR013784 (SUPERFAMILY)	F:GO:0030246; F:GO:2001070	F:carbohydrate binding; F:starch binding	Q9LFB0	2.18793e-10	399392	3.92129e-13	54232	0	XP_005844904.1	XP_005844904.1 hypothetical protein CHLNCDRAFT_54232 [Chlorella variabilis]<>EFN52802.1 hypothetical protein CHLNCDRAFT_54232 [Chlorella variabilis]	554065	4.2e-112	61.0512	51.6481	9.00371	106.382	14.6893	53.8352	NA	NA	NA	NA	NA	NA
NA	OG0000026	13	6	2	g10071	136	Q71H73	H33_VITVI Histone H3.3 OS=Vitis vinifera OX=29760 PE=2 SV=3	1.95403e-94	99.26	NA	NA	NA	IPR000164 (PRINTS); IPR000164 (SMART); IPR007125 (PFAM); IPR009072 (G3DSA:1.10.20.GENE3D); mobidb-lite (MOBIDB_LITE); IPR000164 (PANTHER); PTHR11426:SF224 (PANTHER); IPR000164 (PROSITE_PATTERNS); IPR000164 (PROSITE_PATTERNS); IPR009072 (SUPERFAMILY)	C:GO:0000786; F:GO:0003677; F:GO:0046982	C:nucleosome; F:DNA binding; F:protein heterodimerization activity	P59169	1.08077e-95	798	4.11658e-92	59160	5.88539e-97	XP_005843780.1	XP_005843780.1 hypothetical protein CHLNCDRAFT_59160 [Chlorella variabilis]<>EFN51678.1 hypothetical protein CHLNCDRAFT_59160 [Chlorella variabilis]<>PRW59210.1 Histone [Chlorella sorokiniana]	NA	2.9e-64	406.46	309.157	301.084	269.682	347.983	271.038	NA	NA	NA	NA	NA	NA
NA	OG0000026	13	6	2	g10427	148	P08898	H3_CAEEL Histone H3 OS=Caenorhabditis elegans OX=6239 GN=his-2 PE=1 SV=4	1.48875e-37	64.63	10	P:GO:0000105; F:GO:0004399; F:GO:0008270; P:GO:0008652; C:GO:0009507; C:GO:0009536; F:GO:0016491; F:GO:0046872; F:GO:0051287; P:GO:0055114	P:histidine biosynthetic process; F:histidinol dehydrogenase activity; F:zinc ion binding; P:cellular amino acid biosynthetic process; C:chloroplast; C:plastid; F:oxidoreductase activity; F:metal ion binding; F:NAD binding; P:oxidation-reduction process	IPR000164 (PRINTS); IPR000164 (SMART); IPR007125 (PFAM); IPR009072 (G3DSA:1.10.20.GENE3D); mobidb-lite (MOBIDB_LITE); mobidb-lite (MOBIDB_LITE); PTHR45810 (PANTHER); PTHR45810:SF3 (PANTHER); IPR000164 (PROSITE_PATTERNS); IPR009072 (SUPERFAMILY)	C:GO:0000786; F:GO:0003677; F:GO:0046982	C:nucleosome; F:DNA binding; F:protein heterodimerization activity	P59169	2.21736e-37	155704	5.37194e-38	56611	8.33988e-109	XP_005852255.1	XP_005852255.1 hypothetical protein CHLNCDRAFT_56611 [Chlorella variabilis]<>EFN60153.1 hypothetical protein CHLNCDRAFT_56611 [Chlorella variabilis]	554065	1.2e-74	233.234	233.367	125.872	137.363	150.974	195.077	NA	NA	NA	NA	NA	NA
NA	OG0000026	13	6	2	g3297	136	P84239	H3_URECA Histone H3 OS=Urechis caupo OX=6431 PE=1 SV=2	3.90159e-94	100	NA	NA	NA	IPR000164 (PRINTS); IPR000164 (SMART); IPR009072 (G3DSA:1.10.20.GENE3D); IPR007125 (PFAM); mobidb-lite (MOBIDB_LITE); PTHR11426:SF224 (PANTHER); IPR000164 (PANTHER); IPR000164 (PROSITE_PATTERNS); IPR000164 (PROSITE_PATTERNS); IPR009072 (SUPERFAMILY)	C:GO:0000786; F:GO:0003677; F:GO:0046982	C:nucleosome; F:DNA binding; F:protein heterodimerization activity	P59169	6.05506e-95	798	8.02297e-93	28967	7.49284e-97	XP_005852293.1	XP_005852293.1 hypothetical protein CHLNCDRAFT_28967 [Chlorella variabilis]<>XP_005843099.1 hypothetical protein CHLNCDRAFT_141512 [Chlorella variabilis]<>XP_005843639.1 hypothetical protein CHLNCDRAFT_27828 [Chlorella variabilis]<>XP_005843701.1 hypothetical protein CHLNCDRAFT_27880 [Chlorella variabilis]<>XP_005847128.1 hypothetical protein CHLNCDRAFT_24354 [Chlorella variabilis]<>XP_005847291.…	NA	3.8e-64	0.219411	0.195082	0.240099	0.0892837	0.0480043	0.0547662	NA	NA	NA	NA	NA	NA
NA	OG0000026	13	6	2	g4213	136	P84239	H3_URECA Histone H3 OS=Urechis caupo OX=6431 PE=1 SV=2	3.90159e-94	100	NA	NA	NA	IPR000164 (PRINTS); IPR000164 (SMART); IPR009072 (G3DSA:1.10.20.GENE3D); IPR007125 (PFAM); mobidb-lite (MOBIDB_LITE); PTHR11426:SF224 (PANTHER); IPR000164 (PANTHER); IPR000164 (PROSITE_PATTERNS); IPR000164 (PROSITE_PATTERNS); IPR009072 (SUPERFAMILY)	C:GO:0000786; F:GO:0003677; F:GO:0046982	C:nucleosome; F:DNA binding; F:protein heterodimerization activity	P59169	6.05506e-95	798	8.02297e-93	28967	7.49284e-97	XP_005852293.1	XP_005852293.1 hypothetical protein CHLNCDRAFT_28967 [Chlorella variabilis]<>XP_005843099.1 hypothetical protein CHLNCDRAFT_141512 [Chlorella variabilis]<>XP_005843639.1 hypothetical protein CHLNCDRAFT_27828 [Chlorella variabilis]<>XP_005843701.1 hypothetical protein CHLNCDRAFT_27880 [Chlorella variabilis]<>XP_005847128.1 hypothetical protein CHLNCDRAFT_24354 [Chlorella variabilis]<>XP_005847291.…	NA	3.8e-64	0.109706	0.0487706	0.240099	0.133926	0.192017	0.109532	NA	NA	NA	NA	NA	NA
NA	OG0000026	13	6	2	g5724	136	P84239	H3_URECA Histone H3 OS=Urechis caupo OX=6431 PE=1 SV=2	3.90159e-94	100	NA	NA	NA	IPR000164 (PRINTS); IPR000164 (SMART); IPR009072 (G3DSA:1.10.20.GENE3D); IPR007125 (PFAM); mobidb-lite (MOBIDB_LITE); PTHR11426:SF224 (PANTHER); IPR000164 (PANTHER); IPR000164 (PROSITE_PATTERNS); IPR000164 (PROSITE_PATTERNS); IPR009072 (SUPERFAMILY)	C:GO:0000786; F:GO:0003677; F:GO:0046982	C:nucleosome; F:DNA binding; F:protein heterodimerization activity	P59169	6.05506e-95	798	8.02297e-93	28967	7.49284e-97	XP_005852293.1	XP_005852293.1 hypothetical protein CHLNCDRAFT_28967 [Chlorella variabilis]<>XP_005843099.1 hypothetical protein CHLNCDRAFT_141512 [Chlorella variabilis]<>XP_005843639.1 hypothetical protein CHLNCDRAFT_27828 [Chlorella variabilis]<>XP_005843701.1 hypothetical protein CHLNCDRAFT_27880 [Chlorella variabilis]<>XP_005847128.1 hypothetical protein CHLNCDRAFT_24354 [Chlorella variabilis]<>XP_005847291.…	NA	3.8e-64	0.0548528	0.0487706	0.12005	0.0446419	0.144013	0	NA	NA	NA	NA	NA	NA
NA	OG0000026	13	6	2	g6624	136	P84239	H3_URECA Histone H3 OS=Urechis caupo OX=6431 PE=1 SV=2	3.90159e-94	100	NA	NA	NA	IPR000164 (PRINTS); IPR000164 (SMART); IPR009072 (G3DSA:1.10.20.GENE3D); IPR007125 (PFAM); mobidb-lite (MOBIDB_LITE); PTHR11426:SF224 (PANTHER); IPR000164 (PANTHER); IPR000164 (PROSITE_PATTERNS); IPR000164 (PROSITE_PATTERNS); IPR009072 (SUPERFAMILY)	C:GO:0000786; F:GO:0003677; F:GO:0046982	C:nucleosome; F:DNA binding; F:protein heterodimerization activity	P59169	6.05506e-95	798	8.02297e-93	28967	7.49284e-97	XP_005852293.1	XP_005852293.1 hypothetical protein CHLNCDRAFT_28967 [Chlorella variabilis]<>XP_005843099.1 hypothetical protein CHLNCDRAFT_141512 [Chlorella variabilis]<>XP_005843639.1 hypothetical protein CHLNCDRAFT_27828 [Chlorella variabilis]<>XP_005843701.1 hypothetical protein CHLNCDRAFT_27880 [Chlorella variabilis]<>XP_005847128.1 hypothetical protein CHLNCDRAFT_24354 [Chlorella variabilis]<>XP_005847291.…	NA	3.8e-64	0	0	0	0	0	0	NA	NA	NA	NA	NA	NA
NA	OG0000027	15	6	0	g2680	126	P16866	H2A4_VOLCA Histone H2A-IV OS=Volvox carteri OX=3067 PE=3 SV=1	1.97673e-73	92.19	NA	NA	NA	IPR002119 (PRINTS); IPR002119 (SMART); IPR009072 (G3DSA:1.10.20.GENE3D); IPR032454 (PFAM); IPR007125 (PFAM); mobidb-lite (MOBIDB_LITE); PTHR23430 (PANTHER); PTHR23430:SF234 (PANTHER); IPR032458 (PROSITE_PATTERNS); IPR002119 (CDD); IPR009072 (SUPERFAMILY)	C:GO:0000786; F:GO:0003677; C:GO:0005634; F:GO:0046982	C:nucleosome; F:DNA binding; C:nucleus; F:protein heterodimerization activity	Q9C681	5.8086e-71	97737	4.32157e-74	54989	8.00851e-87	XP_005843638.1	XP_005843638.1 hypothetical protein CHLNCDRAFT_54972 [Chlorella variabilis]<>XP_005843647.1 hypothetical protein CHLNCDRAFT_54989 [Chlorella variabilis]<>EFN51536.1 hypothetical protein CHLNCDRAFT_54972 [Chlorella variabilis]<>EFN51545.1 hypothetical protein CHLNCDRAFT_54989 [Chlorella variabilis]	554065	2e-59	0.329117	0.0975412	0.12005	0	0.0960086	0.109532	NA	NA	NA	NA	NA	NA
NA	OG0000027	15	6	0	g5714	126	P16866	H2A4_VOLCA Histone H2A-IV OS=Volvox carteri OX=3067 PE=3 SV=1	1.97673e-73	92.19	NA	NA	NA	IPR002119 (PRINTS); IPR002119 (SMART); IPR009072 (G3DSA:1.10.20.GENE3D); IPR032454 (PFAM); IPR007125 (PFAM); mobidb-lite (MOBIDB_LITE); PTHR23430 (PANTHER); PTHR23430:SF234 (PANTHER); IPR032458 (PROSITE_PATTERNS); IPR002119 (CDD); IPR009072 (SUPERFAMILY)	C:GO:0000786; F:GO:0003677; C:GO:0005634; F:GO:0046982	C:nucleosome; F:DNA binding; C:nucleus; F:protein heterodimerization activity	Q9C681	5.8086e-71	97737	4.32157e-74	54989	8.00851e-87	XP_005843638.1	XP_005843638.1 hypothetical protein CHLNCDRAFT_54972 [Chlorella variabilis]<>XP_005843647.1 hypothetical protein CHLNCDRAFT_54989 [Chlorella variabilis]<>EFN51536.1 hypothetical protein CHLNCDRAFT_54972 [Chlorella variabilis]<>EFN51545.1 hypothetical protein CHLNCDRAFT_54989 [Chlorella variabilis]	554065	2e-59	0.822793	0.731559	0.240099	0.178567	0.576052	0.383363	NA	NA	NA	NA	NA	NA
NA	OG0000027	15	6	0	g5722	126	P16866	H2A4_VOLCA Histone H2A-IV OS=Volvox carteri OX=3067 PE=3 SV=1	2.54409e-73	92.19	NA	NA	NA	IPR002119 (PRINTS); IPR002119 (SMART); IPR007125 (PFAM); IPR009072 (G3DSA:1.10.20.GENE3D); IPR032454 (PFAM); mobidb-lite (MOBIDB_LITE); PTHR23430 (PANTHER); PTHR23430:SF234 (PANTHER); IPR032458 (PROSITE_PATTERNS); IPR002119 (CDD); IPR009072 (SUPERFAMILY)	C:GO:0000786; F:GO:0003677; C:GO:0005634; F:GO:0046982	C:nucleosome; F:DNA binding; C:nucleus; F:protein heterodimerization activity	Q9C681	6.06911e-71	112753	1.73839e-74	27894	1.82417e-86	XP_005843094.1	XP_005843094.1 hypothetical protein CHLNCDRAFT_28450 [Chlorella variabilis]<>XP_005843702.1 hypothetical protein CHLNCDRAFT_27894 [Chlorella variabilis]<>EFN50992.1 hypothetical protein CHLNCDRAFT_28450 [Chlorella variabilis]<>EFN51600.1 hypothetical protein CHLNCDRAFT_27894 [Chlorella variabilis]<>PRW20373.1 Histone H2A [Chlorella sorokiniana]<>PRW20423.1 Histone H2A [Chlorella sorokiniana]<>PRW…	NA	2.6e-59	0.658234	0.536477	0.240099	0.446419	0.240022	0.273831	NA	NA	NA	NA	NA	NA
NA	OG0000027	15	6	0	g6626	126	P16866	H2A4_VOLCA Histone H2A-IV OS=Volvox carteri OX=3067 PE=3 SV=1	2.54409e-73	92.19	NA	NA	NA	IPR002119 (PRINTS); IPR002119 (SMART); IPR007125 (PFAM); IPR009072 (G3DSA:1.10.20.GENE3D); IPR032454 (PFAM); mobidb-lite (MOBIDB_LITE); PTHR23430 (PANTHER); PTHR23430:SF234 (PANTHER); IPR032458 (PROSITE_PATTERNS); IPR002119 (CDD); IPR009072 (SUPERFAMILY)	C:GO:0000786; F:GO:0003677; C:GO:0005634; F:GO:0046982	C:nucleosome; F:DNA binding; C:nucleus; F:protein heterodimerization activity	Q9C681	6.06911e-71	112753	1.73839e-74	27894	1.82417e-86	XP_005843094.1	XP_005843094.1 hypothetical protein CHLNCDRAFT_28450 [Chlorella variabilis]<>XP_005843702.1 hypothetical protein CHLNCDRAFT_27894 [Chlorella variabilis]<>EFN50992.1 hypothetical protein CHLNCDRAFT_28450 [Chlorella variabilis]<>EFN51600.1 hypothetical protein CHLNCDRAFT_27894 [Chlorella variabilis]<>PRW20373.1 Histone H2A [Chlorella sorokiniana]<>PRW20423.1 Histone H2A [Chlorella sorokiniana]<>PRW…	NA	2.6e-59	0.109706	0.292624	0.180074	0	0.144013	0.109532	NA	NA	NA	NA	NA	NA
NA	OG0000027	15	6	0	g6633	126	P16866	H2A4_VOLCA Histone H2A-IV OS=Volvox carteri OX=3067 PE=3 SV=1	2.54409e-73	92.19	NA	NA	NA	IPR002119 (PRINTS); IPR002119 (SMART); IPR007125 (PFAM); IPR009072 (G3DSA:1.10.20.GENE3D); IPR032454 (PFAM); mobidb-lite (MOBIDB_LITE); PTHR23430 (PANTHER); PTHR23430:SF234 (PANTHER); IPR032458 (PROSITE_PATTERNS); IPR002119 (CDD); IPR009072 (SUPERFAMILY)	C:GO:0000786; F:GO:0003677; C:GO:0005634; F:GO:0046982	C:nucleosome; F:DNA binding; C:nucleus; F:protein heterodimerization activity	Q9C681	6.06911e-71	112753	1.73839e-74	27894	1.82417e-86	XP_005843094.1	XP_005843094.1 hypothetical protein CHLNCDRAFT_28450 [Chlorella variabilis]<>XP_005843702.1 hypothetical protein CHLNCDRAFT_27894 [Chlorella variabilis]<>EFN50992.1 hypothetical protein CHLNCDRAFT_28450 [Chlorella variabilis]<>EFN51600.1 hypothetical protein CHLNCDRAFT_27894 [Chlorella variabilis]<>PRW20373.1 Histone H2A [Chlorella sorokiniana]<>PRW20423.1 Histone H2A [Chlorella sorokiniana]<>PRW…	NA	2.6e-59	0.548528	0.243853	0.240099	0.0892837	0.0960086	0.219065	NA	NA	NA	NA	NA	NA
2	OG0000027	15	6	0	g8955	131	P16866	H2A4_VOLCA Histone H2A-IV OS=Volvox carteri OX=3067 PE=3 SV=1	2.70538e-72	94.17	NA	NA	NA	IPR002119 (PRINTS); IPR002119 (SMART); IPR032454 (PFAM); IPR009072 (G3DSA:1.10.20.GENE3D); IPR007125 (PFAM); mobidb-lite (MOBIDB_LITE); PTHR23430:SF207 (PANTHER); PTHR23430 (PANTHER); IPR032458 (PROSITE_PATTERNS); IPR002119 (CDD); IPR009072 (SUPERFAMILY)	C:GO:0000786; F:GO:0003677; C:GO:0005634; F:GO:0046982	C:nucleosome; F:DNA binding; C:nucleus; F:protein heterodimerization activity	Q9C681	4.20185e-70	97737	1.43638e-73	21904	7.20204e-90	XP_005848689.1	XP_005848689.1 hypothetical protein CHLNCDRAFT_21904 [Chlorella variabilis]<>EFN56587.1 hypothetical protein CHLNCDRAFT_21904 [Chlorella variabilis]	554065	7.6e-62	3.34602	5.75493	7.62314	6.2945	12.0491	6.18858	NA	NA	1.50317	0.0219803	NA	NA
1	OG0000028	6	8	7	g1160	466	P52849	NDST2_HUMAN Bifunctional heparan sulfate N-deacetylase/N-sulfotransferase 2 OS=Homo sapiens OX=9606 GN=NDST2 PE=1 SV=1	3.56564e-06	38.81	NA	NA	NA	G3DSA:3.40.50.300 (GENE3D); IPR037359 (PANTHER); PTHR10605:SF56 (PANTHER); IPR027417 (SUPERFAMILY)	F:GO:0008146	F:sulfotransferase activity	---NA---	NA	395864	4.69345e-06	142285	0	XP_005850150.1	XP_005850150.1 hypothetical protein CHLNCDRAFT_142285 [Chlorella variabilis]<>EFN58048.1 hypothetical protein CHLNCDRAFT_142285 [Chlorella variabilis]	554065	1.3e-260	73.3382	83.7391	1.2005	0.758912	1.87217	0.985792	-5.89248	5.44476e-24	-5.26416	8.79535e-21	NA	NA
NA	OG0000028	6	8	7	g1258	453	---NA---	---NA---	NA	NA	NA	NA	NA	Coil (COILS); G3DSA:3.40.50.300 (GENE3D); PF13469 (PFAM); IPR037359 (PANTHER); IPR027417 (SUPERFAMILY)	F:GO:0008146	F:sulfotransferase activity	---NA---	NA	---NA---	NA	142285	8.02271e-157	PSC68106.1	PSC68106.1 sulfotransferase [Micractinium conductrix]	554055	2.2e-156	10.3123	15.1677	6.5427	15.3122	4.32039	8.92689	NA	NA	NA	NA	NA	NA
3	OG0000028	6	8	7	g1847	514	---NA---	---NA---	NA	NA	NA	NA	NA	G3DSA:3.40.50.300 (GENE3D); mobidb-lite (MOBIDB_LITE); IPR037359 (PANTHER); IPR027417 (SUPERFAMILY)	F:GO:0008146	F:sulfotransferase activity	---NA---	NA	157945	1.11561e-06	141380	0	XP_005843258.1	XP_005843258.1 hypothetical protein CHLNCDRAFT_141380 [Chlorella variabilis]<>EFN51156.1 hypothetical protein CHLNCDRAFT_141380 [Chlorella variabilis]	554065	2.2e-221	1.31647	1.02418	57.7438	46.249	19.6818	22.4541	5.91691	2.77353e-30	4.65898	1.79171e-20	NA	NA
3	OG0000028	6	8	7	g2011	534	---NA---	---NA---	NA	NA	NA	NA	NA	PF13469 (PFAM); G3DSA:3.40.50.300 (GENE3D); mobidb-lite (MOBIDB_LITE); mobidb-lite (MOBIDB_LITE); mobidb-lite (MOBIDB_LITE); mobidb-lite (MOBIDB_LITE); IPR037359 (PANTHER); PTHR10605:SF56 (PANTHER); IPR027417 (SUPERFAMILY)	F:GO:0008146	F:sulfotransferase activity	---NA---	NA	157945	7.54506e-10	57487	1.92422e-114	PSC75434.1	PSC75434.1 sulfotransferase [Micractinium conductrix]	554055	1.1e-125	65.6588	30.4816	205.405	459.231	143.245	183.686	3.33619	3.72364e-06	2.26188	0.00158841	NA	NA
NA	OG0000028	6	8	7	g2012	622	---NA---	---NA---	NA	NA	NA	NA	NA	Coil (COILS); Coil (COILS); G3DSA:3.40.50.300 (GENE3D); PF13469 (PFAM); mobidb-lite (MOBIDB_LITE); mobidb-lite (MOBIDB_LITE); mobidb-lite (MOBIDB_LITE); mobidb-lite (MOBIDB_LITE); mobidb-lite (MOBIDB_LITE); mobidb-lite (MOBIDB_LITE); mobidb-lite (MOBIDB_LITE); PTHR10605:SF56 (PANTHER); IPR037359 (PANTHER); PTHR10605:SF56 (PANTHER); IPR037359 (PANTHER); IPR027417 (SUPERFAMILY)	F:GO:0008146	F:sulfotransferase activity	---NA---	NA	---NA---	NA	57487	0	XP_005848657.1	XP_005848657.1 hypothetical protein CHLNCDRAFT_57487 [Chlorella variabilis]<>EFN56555.1 hypothetical protein CHLNCDRAFT_57487 [Chlorella variabilis]	554065	9.4e-227	73.6125	113.636	107.024	90.8462	179.584	88.1736	NA	NA	NA	NA	NA	NA
1	OG0000028	6	8	7	g6459	480	Q91XQ5	CHSTF_MOUSE Carbohydrate sulfotransferase 15 OS=Mus musculus OX=10090 GN=Chst15 PE=2 SV=1	5.69278e-08	38.11	NA	NA	NA	PF13469 (PFAM); G3DSA:3.40.50.300 (GENE3D); mobidb-lite (MOBIDB_LITE); mobidb-lite (MOBIDB_LITE); mobidb-lite (MOBIDB_LITE); PTHR10605:SF56 (PANTHER); IPR037359 (PANTHER); IPR027417 (SUPERFAMILY)	F:GO:0008146	F:sulfotransferase activity	---NA---	NA	391479	7.5948e-07	133632	0	XP_005852261.1	XP_005852261.1 hypothetical protein CHLNCDRAFT_133632 [Chlorella variabilis]<>EFN60159.1 hypothetical protein CHLNCDRAFT_133632 [Chlorella variabilis]	554065	2.6e-176	24.8483	18.2402	12.8453	9.82121	3.40831	8.76259	NA	NA	-1.34117	0.0331959	NA	NA
3	OG0000028	6	8	7	g6460	463	---NA---	---NA---	NA	NA	NA	NA	NA	G3DSA:3.40.50.300 (GENE3D); PF13469 (PFAM); mobidb-lite (MOBIDB_LITE); mobidb-lite (MOBIDB_LITE); PTHR10605:SF56 (PANTHER); IPR037359 (PANTHER); IPR027417 (SUPERFAMILY)	F:GO:0008146	F:sulfotransferase activity	---NA---	NA	---NA---	NA	133632	0	XP_005852261.1	XP_005852261.1 hypothetical protein CHLNCDRAFT_133632 [Chlorella variabilis]<>EFN60159.1 hypothetical protein CHLNCDRAFT_133632 [Chlorella variabilis]	554065	4.7e-215	0.822793	0.243853	30.2525	10.5801	6.6246	7.22914	5.63245	2.13289e-13	4.19514	3.18722e-08	NA	NA
NA	OG0000028	6	8	7	g6462	318	Q9P7G4	OMA1_SCHPO Mitochondrial metalloendopeptidase OMA1 OS=Schizosaccharomyces pombe (strain 972 / ATCC 24843) OX=284812 GN=oma1 PE=3 SV=1	4.01172e-49	50.33	NA	NA	NA	IPR001915 (PFAM); G3DSA:3.30.2010.10 (GENE3D); PTHR22726 (PANTHER); PTHR22726:SF1 (PANTHER); cd07331 (CDD)	F:GO:0004222; P:GO:0006508	F:metalloendopeptidase activity; P:proteolysis	Q9FLI5	6.15072e-34	402859	6.11349e-53	133633	0	XP_005852262.1	XP_005852262.1 hypothetical protein CHLNCDRAFT_133633 [Chlorella variabilis]<>EFN60160.1 hypothetical protein CHLNCDRAFT_133633 [Chlorella variabilis]	554065	2.3e-144	27.0424	29.6525	17.5272	14.4193	13.6332	15.1155	NA	NA	NA	NA	NA	NA
NA	OG0000029	9	7	4	g1066	1514	Q7PC88	AB31G_ARATH ABC transporter G family member 31 OS=Arabidopsis thaliana OX=3702 GN=ABCG31 PE=1 SV=1	0	54.85	NA	NA	NA	Coil (COILS); Coil (COILS); IPR003593 (SMART); G3DSA:3.40.50.300 (GENE3D); IPR013525 (PFAM); IPR003439 (PFAM); IPR003439 (PFAM); PTHR19241:SF593 (PANTHER); PTHR19241 (PANTHER); IPR003439 (PROSITE_PROFILES); IPR003439 (PROSITE_PROFILES); IPR027417 (SUPERFAMILY); IPR027417 (SUPERFAMILY)	F:GO:0005524; C:GO:0016020; F:GO:0016887	F:ATP binding; C:membrane; F:ATPase activity	Q7PC88	0	115842	0	20690	0	XP_005850437.1	XP_005850437.1 hypothetical protein CHLNCDRAFT_20690 [Chlorella variabilis]<>EFN58335.1 hypothetical protein CHLNCDRAFT_20690 [Chlorella variabilis]	554065	0	131.647	176.598	138.477	117.497	110.122	126.948	NA	NA	NA	NA	NA	NA
NA	OG0000029	9	7	4	g1768	1210	Q8GU92	AB35G_ORYSJ ABC transporter G family member 35 OS=Oryza sativa subsp. japonica OX=39947 GN=ABCG35 PE=3 SV=1	6.73425e-175	54.48	9	P:GO:0000462; P:GO:0002181; F:GO:0003735; C:GO:0005737; C:GO:0005829; C:GO:0005840; P:GO:0006412; C:GO:0022627; C:GO:0030686	P:maturation of SSU-rRNA from tricistronic rRNA transcript (SSU-rRNA, 5.8S rRNA, LSU-rRNA); P:cytoplasmic translation; F:structural constituent of ribosome; C:cytoplasm; C:cytosol; C:ribosome; P:translation; C:cytosolic small ribosomal subunit; C:90S preribosome	Coil (COILS); IPR003593 (SMART); G3DSA:3.40.50.300 (GENE3D); IPR003439 (PFAM); G3DSA:3.40.50.300 (GENE3D); G3DSA:3.40.50.300 (GENE3D); IPR003439 (PFAM); IPR013525 (PFAM); mobidb-lite (MOBIDB_LITE); mobidb-lite (MOBIDB_LITE); mobidb-lite (MOBIDB_LITE); mobidb-lite (MOBIDB_LITE); PTHR19241 (PANTHER); PTHR19241:SF593 (PANTHER); IPR003439 (PROSITE_PROFILES); IPR003439 (PROSITE_PROFILES); IPR027417 (S…	F:GO:0005524; C:GO:0016020; F:GO:0016887	F:ATP binding; C:membrane; F:ATPase activity	Q9XIE2	3.22492e-164	115842	0	58132	0	XP_005846573.1	XP_005846573.1 hypothetical protein CHLNCDRAFT_58132 [Chlorella variabilis]<>EFN54471.1 hypothetical protein CHLNCDRAFT_58132 [Chlorella variabilis]	554065	0	152.381	58.4272	43.3379	111.694	63.3657	92.1168	NA	NA	NA	NA	NA	NA
NA	OG0000029	9	7	4	g4623	1439	Q76CU2	PDR1_TOBAC Pleiotropic drug resistance protein 1 OS=Nicotiana tabacum OX=4097 GN=PDR1 PE=2 SV=1	0	54.72	NA	NA	NA	IPR003593 (SMART); IPR003439 (PFAM); G3DSA:3.40.50.300 (GENE3D); IPR013525 (PFAM); G3DSA:3.40.50.300 (GENE3D); IPR010929 (PFAM); IPR003439 (PFAM); mobidb-lite (MOBIDB_LITE); mobidb-lite (MOBIDB_LITE); PTHR19241 (PANTHER); PTHR19241:SF593 (PANTHER); IPR003439 (PROSITE_PROFILES); IPR003439 (PROSITE_PROFILES); IPR027417 (SUPERFAMILY); IPR027417 (SUPERFAMILY)	F:GO:0005524; C:GO:0016020; C:GO:0016021; F:GO:0016887; F:GO:0042626; P:GO:0055085	F:ATP binding; C:membrane; C:integral component of membrane; F:ATPase activity; F:ATPase activity, coupled to transmembrane movement of substances; P:transmembrane transport	Q94A18	0	115842	0	56680	0	PRW58636.1	PRW58636.1 pleiotropic drug resistance 1-like [Chlorella sorokiniana]	3076	0	45.089	45.2591	22.3892	18.9282	12.0011	22.3994	NA	NA	NA	NA	NA	NA
NA	OG0000029	9	7	4	g651	1171	Q8GU88	AB39G_ORYSJ ABC transporter G family member 39 OS=Oryza sativa subsp. japonica OX=39947 GN=ABCG39 PE=3 SV=1	0	61.17	NA	NA	NA	PR00830 (PRINTS); IPR003593 (SMART); IPR013525 (PFAM); IPR003439 (PFAM); IPR003439 (PFAM); G3DSA:3.40.50.300 (GENE3D); G3DSA:3.40.50.300 (GENE3D); PTHR19241 (PANTHER); PTHR19241:SF593 (PANTHER); IPR003439 (PROSITE_PROFILES); IPR003439 (PROSITE_PROFILES); IPR027417 (SUPERFAMILY); IPR027417 (SUPERFAMILY)	F:GO:0005524; C:GO:0016020; F:GO:0016887	F:ATP binding; C:membrane; F:ATPase activity	Q9M9E1	0	131711	0	58610	0	XP_005845426.1	XP_005845426.1 hypothetical protein CHLNCDRAFT_58610 [Chlorella variabilis]<>EFN53324.1 hypothetical protein CHLNCDRAFT_58610 [Chlorella variabilis]	554065	0	18.65	15.0213	33.3137	13.214	15.1694	20.2087	NA	NA	NA	NA	NA	NA
NA	OG0000029	9	7	4	g665	884	Q7PC87	AB34G_ARATH ABC transporter G family member 34 OS=Arabidopsis thaliana OX=3702 GN=ABCG34 PE=2 SV=1	1.33615e-179	54.96	NA	NA	NA	IPR003593 (SMART); G3DSA:3.40.50.300 (GENE3D); IPR003439 (PFAM); IPR013525 (PFAM); G3DSA:3.40.50.300 (GENE3D); mobidb-lite (MOBIDB_LITE); PTHR19241 (PANTHER); PTHR19241:SF593 (PANTHER); IPR003439 (PROSITE_PROFILES); IPR027417 (SUPERFAMILY); IPR027417 (SUPERFAMILY)	F:GO:0005524; C:GO:0016020; F:GO:0016887	F:ATP binding; C:membrane; F:ATPase activity	Q7PC87	0	131711	9.67054e-139	36538	0	XP_005845298.1	XP_005845298.1 hypothetical protein CHLNCDRAFT_36538 [Chlorella variabilis]<>EFN53196.1 hypothetical protein CHLNCDRAFT_36538 [Chlorella variabilis]	554065	0	13.7681	17.0697	6.3026	5.49095	3.60032	7.66727	NA	NA	NA	NA	NA	NA
3	OG0000029	9	7	4	g7255	1565	Q9XIE2	AB36G_ARATH ABC transporter G family member 36 OS=Arabidopsis thaliana OX=3702 GN=ABCG36 PE=1 SV=1	0	56.98	NA	NA	NA	IPR003593 (SMART); G3DSA:3.40.50.300 (GENE3D); IPR013581 (PFAM); IPR003439 (PFAM); IPR013525 (PFAM); IPR003439 (PFAM); mobidb-lite (MOBIDB_LITE); mobidb-lite (MOBIDB_LITE); mobidb-lite (MOBIDB_LITE); PTHR19241:SF593 (PANTHER); PTHR19241 (PANTHER); PTHR19241:SF593 (PANTHER); PTHR19241 (PANTHER); IPR003439 (PROSITE_PROFILES); IPR003439 (PROSITE_PROFILES); IPR034003 (CDD); IPR027417 (SUPERFAMILY); I…	F:GO:0005524; C:GO:0016020; F:GO:0016887	F:ATP binding; C:membrane; F:ATPase activity	Q9XIE2	0	131711	0	137957	0	XP_005851238.1	XP_005851238.1 hypothetical protein CHLNCDRAFT_137957 [Chlorella variabilis]<>EFN59136.1 hypothetical protein CHLNCDRAFT_137957 [Chlorella variabilis]	554065	0	89.2456	87.7871	354.686	236.289	270.168	238.781	2.16947	4.34253e-06	2.02114	2.33914e-05	NA	NA
2	OG0000029	9	7	4	g9142	1518	Q8GU84	AB48G_ORYSJ ABC transporter G family member 48 OS=Oryza sativa subsp. japonica OX=39947 GN=ABCG48 PE=3 SV=1	0	59.86	NA	NA	NA	IPR003593 (SMART); IPR003439 (PFAM); IPR029481 (PFAM); G3DSA:3.40.50.300 (GENE3D); IPR013581 (PFAM); IPR013525 (PFAM); G3DSA:3.40.50.300 (GENE3D); IPR003439 (PFAM); mobidb-lite (MOBIDB_LITE); mobidb-lite (MOBIDB_LITE); PTHR19241:SF593 (PANTHER); PTHR19241 (PANTHER); IPR003439 (PROSITE_PROFILES); IPR003439 (PROSITE_PROFILES); IPR034003 (CDD); IPR027417 (SUPERFAMILY); IPR027417 (SUPERFAMILY)	F:GO:0005524; C:GO:0016020; F:GO:0016887	F:ATP binding; C:membrane; F:ATPase activity	Q7PC87	0	131711	0	137957	0	XP_005851822.1	XP_005851822.1 hypothetical protein CHLNCDRAFT_133292 [Chlorella variabilis]<>EFN59720.1 hypothetical protein CHLNCDRAFT_133292 [Chlorella variabilis]	554065	0	782.805	741.655	2414.56	2534.36	2404.2	2119.62	2.17378	9.29442e-06	2.06722	3.06806e-05	NA	NA
1	OG0000030	16	2	2	g5307	441	---NA---	---NA---	NA	NA	NA	NA	NA	Coil (COILS); Coil (COILS); Coil (COILS); Coil (COILS); Coil (COILS); Coil (COILS); Coil (COILS); mobidb-lite (MOBIDB_LITE); mobidb-lite (MOBIDB_LITE); PTHR35712 (PANTHER)	no GO terms	no GO terms	---NA---	NA	---NA---	NA	135784	0	XP_005846522.1	XP_005846522.1 hypothetical protein CHLNCDRAFT_135784 [Chlorella variabilis]<>EFN54420.1 hypothetical protein CHLNCDRAFT_135784 [Chlorella variabilis]	554065	1.4e-86	64.2875	59.7928	30.0724	14.464	43.2999	25.4115	-1.07763	0.047013	NA	NA	NA	NA
NA	OG0000030	16	2	2	g9491	493	---NA---	---NA---	NA	NA	NA	NA	NA	PF13688 (PFAM); IPR024079 (G3DSA:3.40.390.GENE3D); mobidb-lite (MOBIDB_LITE); IPR001590 (PROSITE_PROFILES); SSF55486 (SUPERFAMILY)	F:GO:0004222; P:GO:0006508; F:GO:0008237	F:metalloendopeptidase activity; P:proteolysis; F:metallopeptidase activity	---NA---	NA	---NA---	NA	138305	0	XP_005844839.1	XP_005844839.1 hypothetical protein CHLNCDRAFT_138305 [Chlorella variabilis]<>EFN52737.1 hypothetical protein CHLNCDRAFT_138305 [Chlorella variabilis]	554065	9.6e-259	0.0548528	0	0.0600248	0.0446419	0	0.109532	NA	NA	NA	NA	NA	NA
2	OG0000031	18	2	0	g4492	322	---NA---	---NA---	NA	NA	NA	NA	NA	IPR032675 (G3DSA:3.80.10.GENE3D)	no GO terms	no GO terms	---NA---	NA	---NA---	NA	---NA---	NA	PRW56217.1	PRW56217.1 Leucine-rich repeat containing [Chlorella sorokiniana]	3076	4.2e-29	3.78485	3.51148	4.44183	8.08018	7.87271	6.62671	NA	NA	1.48813	0.0257716	NA	NA
NA	OG0000031	18	2	0	g4619	452	---NA---	---NA---	NA	NA	NA	NA	NA	IPR032675 (G3DSA:3.80.10.GENE3D); mobidb-lite (MOBIDB_LITE); mobidb-lite (MOBIDB_LITE); SSF52047 (SUPERFAMILY)	no GO terms	no GO terms	---NA---	NA	---NA---	NA	---NA---	NA	PRW56217.1	PRW56217.1 Leucine-rich repeat containing [Chlorella sorokiniana]	3076	4.4e-48	64.3972	47.6976	37.9356	24.9994	17.4256	27.3283	NA	NA	NA	NA	NA	NA
3	OG0000032	7	7	6	g1478	546	---NA---	---NA---	NA	NA	NA	NA	NA	IPR029058 (G3DSA:3.40.50.GENE3D); mobidb-lite (MOBIDB_LITE); mobidb-lite (MOBIDB_LITE); mobidb-lite (MOBIDB_LITE); PTHR35128 (PANTHER); IPR029058 (SUPERFAMILY)	no GO terms	no GO terms	Q9LXS2	4.71502e-37	205579	5.87019e-25	141975	0	XP_005850266.1	XP_005850266.1 hypothetical protein CHLNCDRAFT_141975 [Chlorella variabilis]<>EFN58164.1 hypothetical protein CHLNCDRAFT_141975 [Chlorella variabilis]	554065	3e-229	0.987351	0.634018	17.047	11.473	11.185	5.58615	4.56241	9.89263e-12	3.87276	8.43579e-09	NA	NA
2	OG0000032	7	7	6	g1479	663	---NA---	---NA---	NA	NA	NA	NA	NA	Coil (COILS); IPR029058 (G3DSA:3.40.50.GENE3D); mobidb-lite (MOBIDB_LITE); PTHR35128 (PANTHER); PTHR35128:SF1 (PANTHER); IPR029058 (SUPERFAMILY)	no GO terms	no GO terms	Q9LXS2	2.73172e-26	205579	5.43918e-32	141974	0	XP_005850014.1	XP_005850014.1 hypothetical protein CHLNCDRAFT_141974 [Chlorella variabilis]<>EFN57912.1 hypothetical protein CHLNCDRAFT_141974 [Chlorella variabilis]	554065	3.9e-287	8.55704	7.16928	550.307	389.322	666.444	314.687	6.33698	1.51073e-22	6.47019	3.65614e-23	NA	NA
3	OG0000032	7	7	6	g4235	521	---NA---	---NA---	NA	NA	NA	NA	NA	IPR029058 (G3DSA:3.40.50.GENE3D); mobidb-lite (MOBIDB_LITE); mobidb-lite (MOBIDB_LITE); mobidb-lite (MOBIDB_LITE); PTHR35128 (PANTHER); PTHR35128:SF1 (PANTHER); PS51257 (PROSITE_PROFILES); IPR029058 (SUPERFAMILY)	no GO terms	no GO terms	Q9LXS2	5.85063e-32	205579	3.28757e-32	134385	0	XP_005847458.1	XP_005847458.1 hypothetical protein CHLNCDRAFT_134385 [Chlorella variabilis]<>EFN55356.1 hypothetical protein CHLNCDRAFT_134385 [Chlorella variabilis]	554065	1.2e-230	7.02116	2.53607	141.899	66.07	122.795	45.5107	4.84595	2.62521e-09	4.65386	1.19436e-08	NA	NA
3	OG0000032	7	7	6	g4236	665	---NA---	---NA---	NA	NA	NA	NA	NA	Coil (COILS); mobidb-lite (MOBIDB_LITE); mobidb-lite (MOBIDB_LITE); mobidb-lite (MOBIDB_LITE); mobidb-lite (MOBIDB_LITE); PTHR35128 (PANTHER); IPR029058 (SUPERFAMILY)	no GO terms	no GO terms	Q9LXS2	2.75566e-38	205579	1.46812e-25	134386	0	XP_005847459.1	XP_005847459.1 hypothetical protein CHLNCDRAFT_134386 [Chlorella variabilis]<>EFN55357.1 hypothetical protein CHLNCDRAFT_134386 [Chlorella variabilis]	554065	1.9e-177	31.2113	17.7525	1154.1	2135.22	1071.79	1234.87	6.59998	2.81392e-20	6.05452	7.68431e-18	NA	NA
1	OG0000032	7	7	6	g8870	309	---NA---	---NA---	NA	NA	NA	NA	NA	IPR029058 (G3DSA:3.40.50.GENE3D); PTHR35128 (PANTHER); IPR029058 (SUPERFAMILY); IPR029058 (SUPERFAMILY)	no GO terms	no GO terms	Q9LXS2	4.17767e-33	205579	5.16858e-37	51615	0	XP_005848937.1	XP_005848937.1 hypothetical protein CHLNCDRAFT_51615 [Chlorella variabilis]<>EFN56835.1 hypothetical protein CHLNCDRAFT_51615 [Chlorella variabilis]	554065	4.3e-172	24.6289	22.4345	4.08168	5.53559	10.4649	7.99587	-1.78952	0.00130938	NA	NA	NA	NA
3	OG0000032	7	7	6	g8872	442	---NA---	---NA---	NA	NA	NA	NA	NA	PTHR35128 (PANTHER); IPR029058 (SUPERFAMILY)	no GO terms	no GO terms	Q9LXS2	7.60509e-42	205579	4.3514e-38	144402	0	XP_005848936.1	XP_005848936.1 hypothetical protein CHLNCDRAFT_144402 [Chlorella variabilis]<>EFN56834.1 hypothetical protein CHLNCDRAFT_144402 [Chlorella variabilis]	554065	1.1e-237	2.79749	4.73075	14.466	15.1782	11.089	12.0486	2.44414	1.06894e-05	2.10635	0.000178595	NA	NA
3	OG0000032	7	7	6	g8873	471	---NA---	---NA---	NA	NA	NA	NA	NA	IPR029058 (G3DSA:3.40.50.GENE3D); mobidb-lite (MOBIDB_LITE); mobidb-lite (MOBIDB_LITE); PTHR35128:SF1 (PANTHER); PTHR35128 (PANTHER); IPR029058 (SUPERFAMILY)	no GO terms	no GO terms	Q9LXS2	7.29446e-30	205579	2.5434e-37	144401	4.23437e-144	PSC73083.1	PSC73083.1 hypothetical protein C2E20_3669 [Micractinium conductrix]	554055	1.2e-101	156.331	189.327	1179.79	2441.15	947.941	1135.69	3.92395	1.23631e-09	3.08324	1.44237e-06	NA	NA
NA	OG0000033	4	1	15	g5851	351	---NA---	---NA---	NA	NA	NA	NA	NA	IPR023393 (G3DSA:3.30.530.GENE3D); IPR005031 (PFAM); PTHR34060:SF1 (PANTHER); PTHR34060 (PANTHER); SSF55961 (SUPERFAMILY); SSF55961 (SUPERFAMILY)	no GO terms	no GO terms	Q9M120	1.85889e-12	377148	8.44974e-45	144086	0	XP_005848595.1	XP_005848595.1 hypothetical protein CHLNCDRAFT_144086 [Chlorella variabilis]<>EFN56493.1 hypothetical protein CHLNCDRAFT_144086 [Chlorella variabilis]	554065	2.7e-146	82.0598	29.6525	28.2717	116.783	43.0119	113.092	NA	NA	NA	NA	NA	NA
1	OG0000034	5	5	8	g10707	202	---NA---	---NA---	NA	NA	NA	NA	NA	IPR036908 (G3DSA:2.40.40.GENE3D); mobidb-lite (MOBIDB_LITE); mobidb-lite (MOBIDB_LITE); mobidb-lite (MOBIDB_LITE); IPR036908 (SUPERFAMILY)	no GO terms	no GO terms	---NA---	NA	---NA---	NA	58394	4.24286e-145	XP_005846166.1	XP_005846166.1 hypothetical protein CHLNCDRAFT_58394 [Chlorella variabilis]<>EFN54064.1 hypothetical protein CHLNCDRAFT_58394 [Chlorella variabilis]	554065	8.4e-76	133.951	356.367	32.8335	18.571	22.562	126.784	-2.84408	0.00455529	NA	NA	NA	NA
1	OG0000034	5	5	8	g10708	204	---NA---	---NA---	NA	NA	NA	NA	NA	IPR036908 (G3DSA:2.40.40.GENE3D); mobidb-lite (MOBIDB_LITE); mobidb-lite (MOBIDB_LITE); IPR036908 (SUPERFAMILY)	no GO terms	no GO terms	---NA---	NA	---NA---	NA	58394	3.86816e-85	XP_005846166.1	XP_005846166.1 hypothetical protein CHLNCDRAFT_58394 [Chlorella variabilis]<>EFN54064.1 hypothetical protein CHLNCDRAFT_58394 [Chlorella variabilis]	554065	7.2e-67	125.119	277.017	7.68317	3.61599	9.69687	42.0604	-4.75857	2.07645e-07	-2.48687	0.00422836	NA	NA
2	OG0000034	5	5	8	g1787	156	---NA---	---NA---	NA	NA	NA	NA	NA	IPR036908 (G3DSA:2.40.40.GENE3D); PTHR31836 (PANTHER); PTHR31836:SF21 (PANTHER); IPR036908 (SUPERFAMILY)	no GO terms	no GO terms	---NA---	NA	---NA---	NA	58394	1.70779e-38	PSC76703.1	PSC76703.1 hypothetical protein C2E20_0341 [Micractinium conductrix]	554055	4.9e-39	0.822793	1.26804	1.62067	1.96424	1.72816	4.43606	NA	NA	2.02483	0.0111588	NA	NA
NA	OG0000034	5	5	8	g2305	234	Q18DN4	HMU_HALWD Halomucin OS=Haloquadratum walsbyi (strain DSM 16790 / HBSQ001) OX=362976 GN=hmu PE=3 SV=1	2.03637e-07	50	24	P:GO:0000380; P:GO:0000381; P:GO:0000395; P:GO:0000398; F:GO:0003676; F:GO:0003723; F:GO:0003729; F:GO:0005515; C:GO:0005634; C:GO:0005654; C:GO:0005681; C:GO:0005737; P:GO:0006376; P:GO:0006397; P:GO:0006405; P:GO:0006406; P:GO:0008380; C:GO:0016607; P:GO:0031124; C:GO:0035145; F:GO:0044547; P:GO:0045292; P:GO:0051028; C:GO:0071013	P:alternative mRNA splicing, via spliceosome; P:regulation of alternative mRNA splicing, via spliceosome; P:mRNA 5'-splice site recognition; P:mRNA splicing, via spliceosome; F:nucleic acid binding; F:RNA binding; F:mRNA binding; F:protein binding; C:nucleus; C:nucleoplasm; C:spliceosomal complex; C:cytoplasm; P:mRNA splice site selection; P:mRNA processing; P:RNA export from nucleus; P:mRNA expo…	Coil (COILS); IPR036908 (G3DSA:2.40.40.GENE3D); IPR001153 (PFAM); mobidb-lite (MOBIDB_LITE); mobidb-lite (MOBIDB_LITE); PTHR31836 (PANTHER); PTHR31836:SF21 (PANTHER); PS51257 (PROSITE_PROFILES); IPR036908 (SUPERFAMILY)	P:GO:0042742; P:GO:0050832	P:defense response to bacterium; P:defense response to fungus	---NA---	NA	---NA---	NA	58394	3.18191e-40	PSC68371.1	PSC68371.1 polyribonucleotide nucleotidyltransferase [Micractinium conductrix]	554055	3.6e-38	1.59073	4.04796	0.840347	6.87485	1.82416	7.72204	NA	NA	NA	NA	NA	NA
2	OG0000034	5	5	8	g256	214	---NA---	---NA---	NA	NA	NA	NA	NA	IPR036908 (G3DSA:2.40.40.GENE3D); mobidb-lite (MOBIDB_LITE); mobidb-lite (MOBIDB_LITE); PTHR31836 (PANTHER); PTHR31836:SF21 (PANTHER); IPR016024 (SUPERFAMILY); IPR036908 (SUPERFAMILY)	no GO terms	no GO terms	---NA---	NA	---NA---	NA	58394	2.11744e-35	PSC68371.1	PSC68371.1 polyribonucleotide nucleotidyltransferase [Micractinium conductrix]	554055	2.1e-37	27.8104	23.1173	44.6584	41.6062	89.096	61.8858	1.2244	0.0108384	2.07028	1.24763e-05	NA	NA
1	OG0000035	13	2	3	g25	464	---NA---	---NA---	NA	NA	NA	NA	NA	IPR038538 (G3DSA:1.25.70.GENE3D); IPR003690 (PFAM); mobidb-lite (MOBIDB_LITE)	F:GO:0003690; P:GO:0006355	F:double-stranded DNA binding; P:regulation of transcription, DNA-templated	---NA---	NA	---NA---	NA	50446	1.95679e-20	PRW05890.1	PRW05890.1 transcription termination factor mitochondrial precursor [Chlorella sorokiniana]	3076	2.2e-79	7.29543	5.95001	2.58106	1.96424	1.29612	1.53345	NA	NA	-1.72915	0.00470152	NA	NA
2	OG0000035	13	2	3	g28	464	---NA---	---NA---	NA	NA	NA	NA	NA	IPR003690 (PFAM); IPR038538 (G3DSA:1.25.70.GENE3D); mobidb-lite (MOBIDB_LITE)	F:GO:0003690; P:GO:0006355	F:double-stranded DNA binding; P:regulation of transcription, DNA-templated	---NA---	NA	---NA---	NA	50446	2.78024e-19	PRW05890.1	PRW05890.1 transcription termination factor mitochondrial precursor [Chlorella sorokiniana]	3076	1.9e-78	71.7475	64.6698	127.493	76.3822	143.965	98.3053	1.00049	0.0452758	1.33086	0.00678362	NA	NA
NA	OG0000036	0	7	11	g5673	893	Q6Z461	SPL13_ORYSJ Squamosa promoter-binding-like protein 13 OS=Oryza sativa subsp. japonica OX=39947 GN=SPL13 PE=2 SV=1	6.24711e-09	58.9	NA	NA	NA	Coil (COILS); IPR004333 (PFAM); IPR036893 (G3DSA:4.10.1100.GENE3D); mobidb-lite (MOBIDB_LITE); mobidb-lite (MOBIDB_LITE); mobidb-lite (MOBIDB_LITE); mobidb-lite (MOBIDB_LITE); mobidb-lite (MOBIDB_LITE); mobidb-lite (MOBIDB_LITE); mobidb-lite (MOBIDB_LITE); mobidb-lite (MOBIDB_LITE); mobidb-lite (MOBIDB_LITE); mobidb-lite (MOBIDB_LITE); mobidb-lite (MOBIDB_LITE); mobidb-lite (MOBIDB_LITE); mobidb-…	F:GO:0003677; C:GO:0005634	F:DNA binding; C:nucleus	Q9M2Q6	3.57174e-14	414856	1.09504e-11	140043	0	XP_005843727.1	XP_005843727.1 hypothetical protein CHLNCDRAFT_140043 [Chlorella variabilis]<>EFN51625.1 hypothetical protein CHLNCDRAFT_140043 [Chlorella variabilis]	554065	2e-190	0.0548528	0.0487706	0.180074	0.0446419	0.192017	0	NA	NA	NA	NA	NA	NA
NA	OG0000036	0	7	11	g69	619	Q653Z5	SPL11_ORYSJ Squamosa promoter-binding-like protein 11 OS=Oryza sativa subsp. japonica OX=39947 GN=SPL11 PE=2 SV=1	1.1134e-16	65.33	NA	NA	NA	Coil (COILS); Coil (COILS); IPR036893 (G3DSA:4.10.1100.GENE3D); IPR004333 (PFAM); mobidb-lite (MOBIDB_LITE); mobidb-lite (MOBIDB_LITE); mobidb-lite (MOBIDB_LITE); mobidb-lite (MOBIDB_LITE); PTHR31251 (PANTHER); PTHR31251:SF108 (PANTHER); IPR004333 (PROSITE_PROFILES); IPR036893 (SUPERFAMILY)	F:GO:0003677; C:GO:0005634	F:DNA binding; C:nucleus	Q9M2Q6	1.12905e-16	115124	2.5713e-20	28394	1.07587e-50	XP_005843197.1	XP_005843197.1 hypothetical protein CHLNCDRAFT_28394 [Chlorella variabilis]<>EFN51095.1 hypothetical protein CHLNCDRAFT_28394 [Chlorella variabilis]	554065	2.4e-36	140.862	124.609	77.492	59.7308	60.0534	90.1999	NA	NA	NA	NA	NA	NA
NA	OG0000036	0	7	11	g8382	443	Q7XT42	SPL7_ORYSJ Squamosa promoter-binding-like protein 7 OS=Oryza sativa subsp. japonica OX=39947 GN=SPL7 PE=2 SV=2	1.53752e-13	59.09	NA	NA	NA	IPR004333 (PFAM); IPR036893 (G3DSA:4.10.1100.GENE3D); mobidb-lite (MOBIDB_LITE); mobidb-lite (MOBIDB_LITE); mobidb-lite (MOBIDB_LITE); mobidb-lite (MOBIDB_LITE); PTHR31251 (PANTHER); IPR004333 (PROSITE_PROFILES); IPR036893 (SUPERFAMILY)	F:GO:0003677; C:GO:0005634	F:DNA binding; C:nucleus	Q700W2	2.40019e-14	291579	8.46943e-16	136317	0	XP_005845837.1	XP_005845837.1 hypothetical protein CHLNCDRAFT_136317 [Chlorella variabilis]<>EFN53735.1 hypothetical protein CHLNCDRAFT_136317 [Chlorella variabilis]	554065	3.5e-183	0.548528	0.341394	0.0600248	0.535702	0.0960086	0.109532	NA	NA	NA	NA	NA	NA
NA	OG0000036	0	7	11	g8442	360	Q9LGU7	SPL1_ORYSJ Squamosa promoter-binding-like protein 1 OS=Oryza sativa subsp. japonica OX=39947 GN=SPL1 PE=2 SV=1	1.43954e-09	49.59	NA	NA	NA	IPR004333 (PFAM); IPR036893 (G3DSA:4.10.1100.GENE3D); mobidb-lite (MOBIDB_LITE); mobidb-lite (MOBIDB_LITE); mobidb-lite (MOBIDB_LITE); PTHR31251:SF108 (PANTHER); PTHR31251 (PANTHER); IPR004333 (PROSITE_PROFILES); IPR036893 (SUPERFAMILY)	F:GO:0003677; C:GO:0005634	F:DNA binding; C:nucleus	Q94JW8	4.44819e-10	291579	8.1572e-11	136692	0	XP_005845544.1	XP_005845544.1 hypothetical protein CHLNCDRAFT_136692 [Chlorella variabilis]<>EFN53442.1 hypothetical protein CHLNCDRAFT_136692 [Chlorella variabilis]	554065	1.8e-145	9.10557	10.4369	1.86077	6.20522	1.05609	6.40765	NA	NA	NA	NA	NA	NA
NA	OG0000036	0	7	11	g8444	544	---NA---	---NA---	NA	NA	NA	NA	NA	IPR004333 (PFAM); mobidb-lite (MOBIDB_LITE); mobidb-lite (MOBIDB_LITE); mobidb-lite (MOBIDB_LITE); mobidb-lite (MOBIDB_LITE); mobidb-lite (MOBIDB_LITE); mobidb-lite (MOBIDB_LITE); mobidb-lite (MOBIDB_LITE); mobidb-lite (MOBIDB_LITE); mobidb-lite (MOBIDB_LITE); mobidb-lite (MOBIDB_LITE); IPR036893 (SUPERFAMILY)	F:GO:0003677; C:GO:0005634	F:DNA binding; C:nucleus	---NA---	NA	---NA---	NA	136695	0	XP_005845547.1	XP_005845547.1 hypothetical protein CHLNCDRAFT_136695 [Chlorella variabilis]<>EFN53445.1 hypothetical protein CHLNCDRAFT_136695 [Chlorella variabilis]	554065	9.5e-183	0.109706	0	0.180074	0.0892837	0.33603	0.0547662	NA	NA	NA	NA	NA	NA
NA	OG0000036	0	7	11	g8537	625	---NA---	---NA---	NA	NA	NA	NA	NA	Coil (COILS); IPR004333 (PFAM); IPR036893 (G3DSA:4.10.1100.GENE3D); mobidb-lite (MOBIDB_LITE); mobidb-lite (MOBIDB_LITE); mobidb-lite (MOBIDB_LITE); mobidb-lite (MOBIDB_LITE); mobidb-lite (MOBIDB_LITE); mobidb-lite (MOBIDB_LITE); PTHR31251 (PANTHER); PTHR31251:SF108 (PANTHER); IPR004333 (PROSITE_PROFILES); IPR036893 (SUPERFAMILY)	F:GO:0003677; C:GO:0005634	F:DNA binding; C:nucleus	Q9S7A9	3.17789e-12	171833	6.53839e-15	53768	0	XP_005845592.1	XP_005845592.1 hypothetical protein CHLNCDRAFT_53768 [Chlorella variabilis]<>EFN53490.1 hypothetical protein CHLNCDRAFT_53768 [Chlorella variabilis]	554065	3.5e-128	16.6753	4.73075	10.6844	11.2944	3.69633	4.27176	NA	NA	NA	NA	NA	NA
1	OG0000036	0	7	11	g998	998	Q38740	SBP2_ANTMA Squamosa promoter-binding protein 2 OS=Antirrhinum majus OX=4151 GN=SBP2 PE=2 SV=1	1.03074e-18	66.22	NA	NA	NA	Coil (COILS); IPR004333 (PFAM); IPR036893 (G3DSA:4.10.1100.GENE3D); mobidb-lite (MOBIDB_LITE); mobidb-lite (MOBIDB_LITE); mobidb-lite (MOBIDB_LITE); mobidb-lite (MOBIDB_LITE); mobidb-lite (MOBIDB_LITE); mobidb-lite (MOBIDB_LITE); mobidb-lite (MOBIDB_LITE); mobidb-lite (MOBIDB_LITE); mobidb-lite (MOBIDB_LITE); mobidb-lite (MOBIDB_LITE); PTHR31251 (PANTHER); PTHR31251:SF74 (PANTHER); IPR004333 (PRO…	F:GO:0003677; C:GO:0005634	F:DNA binding; C:nucleus	Q9S7A9	2.07193e-19	186869	4.82548e-23	133640	9.09359e-45	PRW60598.1	PRW60598.1 Negative elongation factor B [Chlorella sorokiniana]	3076	1e-49	131.482	117.683	33.5538	23.6155	22.178	56.7926	-1.68723	0.00273184	-1.17561	0.0415728	NA	NA
NA	OG0000037	16	1	0	g6043	81	---NA---	---NA---	NA	NA	NA	NA	NA	no IPS match	no IPS match	no IPS match	---NA---	NA	---NA---	NA	---NA---	NA	PRW57341.1	PRW57341.1 putative uncharacterized protein LOC104611017 [Chlorella sorokiniana]	3076	4.9e-19	1.37132	1.21927	0.780322	0.223209	0.480043	0.383363	NA	NA	NA	NA	NA	NA
NA	OG0000038	13	4	0	g2681	103	P0CG89	H4_SOYBN Histone H4 OS=Glycine max OX=3847 PE=3 SV=1	1.65714e-65	99.02	NA	NA	NA	IPR001951 (PRINTS); IPR001951 (SMART); IPR009072 (G3DSA:1.10.20.GENE3D); IPR035425 (PFAM); mobidb-lite (MOBIDB_LITE); PTHR10484 (PANTHER); PTHR10484:SF171 (PANTHER); IPR019809 (PROSITE_PATTERNS); IPR001951 (CDD); IPR009072 (SUPERFAMILY)	C:GO:0000786; F:GO:0003677; C:GO:0005634; F:GO:0046982	C:nucleosome; F:DNA binding; C:nucleus; F:protein heterodimerization activity	P59259	9.16557e-67	796	5.30133e-53	27849	5.01967e-69	XP_005843696.1	XP_005843696.1 hypothetical protein CHLNCDRAFT_139973 [Chlorella variabilis]<>XP_005843707.1 hypothetical protein CHLNCDRAFT_27849 [Chlorella variabilis]<>XP_005846938.1 hypothetical protein CHLNCDRAFT_48891 [Chlorella variabilis]<>XP_011396743.1 Histone H4 [Auxenochlorella protothecoides]<>XP_011397776.1 Histone H4 [Auxenochlorella protothecoides]<>XP_011399210.1 Histone H4 [Auxenochlorella prot…	NA	8.4e-48	0	0	0	0	0.0480043	0	NA	NA	NA	NA	NA	NA
NA	OG0000038	13	4	0	g3298	103	P0CG89	H4_SOYBN Histone H4 OS=Glycine max OX=3847 PE=3 SV=1	1.65714e-65	99.02	NA	NA	NA	IPR001951 (PRINTS); IPR001951 (SMART); IPR009072 (G3DSA:1.10.20.GENE3D); IPR035425 (PFAM); mobidb-lite (MOBIDB_LITE); PTHR10484 (PANTHER); PTHR10484:SF171 (PANTHER); IPR019809 (PROSITE_PATTERNS); IPR001951 (CDD); IPR009072 (SUPERFAMILY)	C:GO:0000786; F:GO:0003677; C:GO:0005634; F:GO:0046982	C:nucleosome; F:DNA binding; C:nucleus; F:protein heterodimerization activity	P59259	9.16557e-67	796	5.30133e-53	27849	5.01967e-69	XP_005843696.1	XP_005843696.1 hypothetical protein CHLNCDRAFT_139973 [Chlorella variabilis]<>XP_005843707.1 hypothetical protein CHLNCDRAFT_27849 [Chlorella variabilis]<>XP_005846938.1 hypothetical protein CHLNCDRAFT_48891 [Chlorella variabilis]<>XP_011396743.1 Histone H4 [Auxenochlorella protothecoides]<>XP_011397776.1 Histone H4 [Auxenochlorella protothecoides]<>XP_011399210.1 Histone H4 [Auxenochlorella prot…	NA	8.4e-48	0.0548528	0.0487706	0.0600248	0	0.0960086	0	NA	NA	NA	NA	NA	NA
NA	OG0000038	13	4	0	g5723	103	P0CG89	H4_SOYBN Histone H4 OS=Glycine max OX=3847 PE=3 SV=1	1.65714e-65	99.02	NA	NA	NA	IPR001951 (PRINTS); IPR001951 (SMART); IPR009072 (G3DSA:1.10.20.GENE3D); IPR035425 (PFAM); mobidb-lite (MOBIDB_LITE); PTHR10484 (PANTHER); PTHR10484:SF171 (PANTHER); IPR019809 (PROSITE_PATTERNS); IPR001951 (CDD); IPR009072 (SUPERFAMILY)	C:GO:0000786; F:GO:0003677; C:GO:0005634; F:GO:0046982	C:nucleosome; F:DNA binding; C:nucleus; F:protein heterodimerization activity	P59259	9.16557e-67	796	5.30133e-53	27849	5.01967e-69	XP_005843696.1	XP_005843696.1 hypothetical protein CHLNCDRAFT_139973 [Chlorella variabilis]<>XP_005843707.1 hypothetical protein CHLNCDRAFT_27849 [Chlorella variabilis]<>XP_005846938.1 hypothetical protein CHLNCDRAFT_48891 [Chlorella variabilis]<>XP_011396743.1 Histone H4 [Auxenochlorella protothecoides]<>XP_011397776.1 Histone H4 [Auxenochlorella protothecoides]<>XP_011399210.1 Histone H4 [Auxenochlorella prot…	NA	8.4e-48	0	0	0	0	0.0960086	0	NA	NA	NA	NA	NA	NA
NA	OG0000038	13	4	0	g6625	103	P0CG89	H4_SOYBN Histone H4 OS=Glycine max OX=3847 PE=3 SV=1	1.65714e-65	99.02	NA	NA	NA	IPR001951 (PRINTS); IPR001951 (SMART); IPR009072 (G3DSA:1.10.20.GENE3D); IPR035425 (PFAM); mobidb-lite (MOBIDB_LITE); PTHR10484 (PANTHER); PTHR10484:SF171 (PANTHER); IPR019809 (PROSITE_PATTERNS); IPR001951 (CDD); IPR009072 (SUPERFAMILY)	C:GO:0000786; F:GO:0003677; C:GO:0005634; F:GO:0046982	C:nucleosome; F:DNA binding; C:nucleus; F:protein heterodimerization activity	P59259	9.16557e-67	796	5.30133e-53	27849	5.01967e-69	XP_005843696.1	XP_005843696.1 hypothetical protein CHLNCDRAFT_139973 [Chlorella variabilis]<>XP_005843707.1 hypothetical protein CHLNCDRAFT_27849 [Chlorella variabilis]<>XP_005846938.1 hypothetical protein CHLNCDRAFT_48891 [Chlorella variabilis]<>XP_011396743.1 Histone H4 [Auxenochlorella protothecoides]<>XP_011397776.1 Histone H4 [Auxenochlorella protothecoides]<>XP_011399210.1 Histone H4 [Auxenochlorella prot…	NA	8.4e-48	0.713087	0.390165	0.600248	0.0446419	0.67206	0.164299	NA	NA	NA	NA	NA	NA
1	OG0000039	4	7	6	g10739	372	Q54CY9	MYLKD_DICDI Probable myosin light chain kinase DDB_G0292624 OS=Dictyostelium discoideum OX=44689 GN=DDB_G0292624 PE=3 SV=1	5.00135e-71	61	NA	NA	NA	IPR000719 (SMART); IPR000719 (PFAM); G3DSA:3.30.200.20 (GENE3D); PIRSF000654 (PIRSF); G3DSA:1.10.510.10 (GENE3D); mobidb-lite (MOBIDB_LITE); mobidb-lite (MOBIDB_LITE); PTHR44167 (PANTHER); IPR008271 (PROSITE_PATTERNS); IPR017441 (PROSITE_PATTERNS); IPR000719 (PROSITE_PROFILES); cd05117 (CDD); IPR011009 (SUPERFAMILY)	F:GO:0004672; F:GO:0005524; P:GO:0006468	F:protein kinase activity; F:ATP binding; P:protein phosphorylation	Q42396	1.56583e-62	381301	5.8167e-95	8755	0	XP_005846045.1	XP_005846045.1 hypothetical protein CHLNCDRAFT_8755, partial [Chlorella variabilis]<>EFN53943.1 hypothetical protein CHLNCDRAFT_8755, partial [Chlorella variabilis]	554065	1.6e-165	54.3043	79.0571	26.2308	22.8566	9.21683	24.4805	NA	NA	-1.50618	0.0132777	NA	NA
NA	OG0000039	4	7	6	g1505	361	Q14012	KCC1A_HUMAN Calcium/calmodulin-dependent protein kinase type 1 OS=Homo sapiens OX=9606 GN=CAMK1 PE=1 SV=1	2.9956e-64	53.75	NA	NA	NA	IPR000719 (SMART); G3DSA:1.10.238.10 (GENE3D); G3DSA:1.10.510.10 (GENE3D); G3DSA:3.30.200.20 (GENE3D); IPR000719 (PFAM); PIRSF000654 (PIRSF); PTHR24347 (PANTHER); IPR008271 (PROSITE_PATTERNS); IPR017441 (PROSITE_PATTERNS); IPR000719 (PROSITE_PROFILES); cd05117 (CDD); IPR011009 (SUPERFAMILY)	F:GO:0004672; F:GO:0005524; P:GO:0006468	F:protein kinase activity; F:ATP binding; P:protein phosphorylation	Q9LDQ1	1.38646e-59	381301	2.6579e-106	37582	0	XP_005843147.1	XP_005843147.1 hypothetical protein CHLNCDRAFT_37582, partial [Chlorella variabilis]<>EFN51045.1 hypothetical protein CHLNCDRAFT_37582, partial [Chlorella variabilis]	554065	6.8e-169	20.0213	19.5082	18.7877	8.03554	7.58468	9.14596	NA	NA	NA	NA	NA	NA
NA	OG0000039	4	7	6	g2853	396	A8X6H4	CMK1_CAEBR Calcium/calmodulin-dependent protein kinase type 1 OS=Caenorhabditis briggsae OX=6238 GN=cmk-1 PE=3 SV=4	4.63794e-68	58.98	NA	NA	NA	IPR000719 (SMART); IPR000719 (PFAM); PIRSF000654 (PIRSF); G3DSA:3.30.200.20 (GENE3D); G3DSA:1.10.510.10 (GENE3D); mobidb-lite (MOBIDB_LITE); mobidb-lite (MOBIDB_LITE); PTHR24347 (PANTHER); IPR017441 (PROSITE_PATTERNS); IPR008271 (PROSITE_PATTERNS); IPR000719 (PROSITE_PROFILES); cd05117 (CDD); IPR011009 (SUPERFAMILY)	F:GO:0004672; F:GO:0005524; P:GO:0006468	F:protein kinase activity; F:ATP binding; P:protein phosphorylation	Q3E9C0	3.15584e-57	381301	5.01978e-93	136852	0	XP_005845612.1	XP_005845612.1 hypothetical protein CHLNCDRAFT_136852 [Chlorella variabilis]<>EFN53510.1 hypothetical protein CHLNCDRAFT_136852 [Chlorella variabilis]	554065	1.9e-180	69.718	58.7198	53.6021	53.8381	34.9471	55.3139	NA	NA	NA	NA	NA	NA
1	OG0000039	4	7	6	g2854	413	Q8BW96	KCC1D_MOUSE Calcium/calmodulin-dependent protein kinase type 1D OS=Mus musculus OX=10090 GN=Camk1d PE=1 SV=2	1.02218e-71	59.36	34	F:GO:0004622; F:GO:0004771; F:GO:0004806; C:GO:0005576; C:GO:0005615; C:GO:0005737; C:GO:0005791; C:GO:0005794; C:GO:0005829; C:GO:0005887; P:GO:0006629; P:GO:0007158; P:GO:0008150; C:GO:0009986; P:GO:0016042; F:GO:0016787; F:GO:0016788; C:GO:0032991; F:GO:0038023; F:GO:0042043; P:GO:0042572; C:GO:0042588; F:GO:0043208; C:GO:0043231; F:GO:0044877; C:GO:0045121; C:GO:0045202; P:GO:0048488; F:GO:00…	F:lysophospholipase activity; F:sterol esterase activity; F:triglyceride lipase activity; C:extracellular region; C:extracellular space; C:cytoplasm; C:rough endoplasmic reticulum; C:Golgi apparatus; C:cytosol; C:integral component of plasma membrane; P:lipid metabolic process; P:neuron cell-cell adhesion; P:biological_process; C:cell surface; P:lipid catabolic process; F:hydrolase activity; F:hy…	IPR000719 (SMART); G3DSA:3.30.200.20 (GENE3D); G3DSA:1.10.510.10 (GENE3D); IPR000719 (PFAM); G3DSA:1.10.238.10 (GENE3D); mobidb-lite (MOBIDB_LITE); PTHR24347 (PANTHER); IPR008271 (PROSITE_PATTERNS); IPR017441 (PROSITE_PATTERNS); IPR000719 (PROSITE_PROFILES); cd05117 (CDD); IPR011009 (SUPERFAMILY)	F:GO:0004672; F:GO:0005524; P:GO:0006468	F:protein kinase activity; F:ATP binding; P:protein phosphorylation	Q9LDQ1	3.75397e-64	381301	3.80967e-102	32147	0	XP_005845710.1	XP_005845710.1 hypothetical protein CHLNCDRAFT_32147 [Chlorella variabilis]<>EFN53608.1 hypothetical protein CHLNCDRAFT_32147 [Chlorella variabilis]	554065	1.1e-231	69.9374	75.3018	30.5526	10.714	18.8657	21.5779	-1.44261	0.00787451	-1.35122	0.013608	NA	NA
1	OG0000039	4	7	6	g4517	368	Q54CY9	MYLKD_DICDI Probable myosin light chain kinase DDB_G0292624 OS=Dictyostelium discoideum OX=44689 GN=DDB_G0292624 PE=3 SV=1	7.98892e-68	60.77	NA	NA	NA	IPR000719 (SMART); IPR000719 (PFAM); G3DSA:1.10.238.10 (GENE3D); G3DSA:3.30.200.20 (GENE3D); PIRSF000654 (PIRSF); G3DSA:1.10.510.10 (GENE3D); PTHR24347 (PANTHER); IPR017441 (PROSITE_PATTERNS); IPR008271 (PROSITE_PATTERNS); IPR000719 (PROSITE_PROFILES); cd05117 (CDD); IPR011009 (SUPERFAMILY)	F:GO:0004672; F:GO:0005524; P:GO:0006468	F:protein kinase activity; F:ATP binding; P:protein phosphorylation	Q38873	9.73295e-66	381301	1.99289e-109	33257	0	XP_005843149.1	XP_005843149.1 hypothetical protein CHLNCDRAFT_33257 [Chlorella variabilis]<>EFN51047.1 hypothetical protein CHLNCDRAFT_33257 [Chlorella variabilis]	554065	1.8e-201	60.4478	84.0805	4.20173	8.97301	4.08037	15.7727	-2.9174	0.000522457	-2.38932	0.00446169	NA	NA
NA	OG0000039	4	7	6	g4518	386	Q54CY9	MYLKD_DICDI Probable myosin light chain kinase DDB_G0292624 OS=Dictyostelium discoideum OX=44689 GN=DDB_G0292624 PE=3 SV=1	2.98428e-68	60.06	NA	NA	NA	IPR000719 (SMART); PIRSF000654 (PIRSF); IPR000719 (PFAM); G3DSA:3.30.200.20 (GENE3D); G3DSA:1.10.510.10 (GENE3D); G3DSA:1.10.238.10 (GENE3D); mobidb-lite (MOBIDB_LITE); PTHR24347 (PANTHER); IPR017441 (PROSITE_PATTERNS); IPR008271 (PROSITE_PATTERNS); IPR000719 (PROSITE_PROFILES); cd05117 (CDD); IPR011009 (SUPERFAMILY)	F:GO:0004672; F:GO:0005524; P:GO:0006468	F:protein kinase activity; F:ATP binding; P:protein phosphorylation	Q42396	1.67582e-59	381301	9.72131e-111	141552	0	XP_005843148.1	XP_005843148.1 hypothetical protein CHLNCDRAFT_141552 [Chlorella variabilis]<>EFN51046.1 hypothetical protein CHLNCDRAFT_141552 [Chlorella variabilis]	554065	2.1e-221	147.828	117.732	60.745	64.0611	39.7476	82.6422	NA	NA	NA	NA	NA	NA
1	OG0000039	4	7	6	g8423	386	P25323	MYLKA_DICDI Myosin light chain kinase A OS=Dictyostelium discoideum OX=44689 GN=mlkA PE=1 SV=2	6.19492e-80	63.77	1	F:GO:0016810	F:hydrolase activity, acting on carbon-nitrogen (but not peptide) bonds	IPR000719 (SMART); G3DSA:3.30.200.20 (GENE3D); IPR000719 (PFAM); G3DSA:1.10.238.10 (GENE3D); G3DSA:1.10.510.10 (GENE3D); PF12330 (PFAM); PIRSF000654 (PIRSF); mobidb-lite (MOBIDB_LITE); PTHR24347 (PANTHER); IPR008271 (PROSITE_PATTERNS); IPR017441 (PROSITE_PATTERNS); IPR000719 (PROSITE_PROFILES); cd05117 (CDD); IPR011009 (SUPERFAMILY)	F:GO:0004672; F:GO:0005524; P:GO:0006468	F:protein kinase activity; F:ATP binding; P:protein phosphorylation	Q38870	2.01321e-71	381301	3.75354e-124	136678	0	XP_005845648.1	XP_005845648.1 hypothetical protein CHLNCDRAFT_136678 [Chlorella variabilis]<>EFN53546.1 hypothetical protein CHLNCDRAFT_136678 [Chlorella variabilis]	554065	3.3e-214	147.28	115.245	63.6262	35.8028	44.5	54.9305	-0.984759	0.03898	NA	NA	NA	NA
NA	OG0000040	11	3	3	g2286	536	O14369	SCE3_SCHPO Probable RNA-binding protein sce3 OS=Schizosaccharomyces pombe (strain 972 / ATCC 24843) OX=284812 GN=sce3 PE=1 SV=1	1.12226e-18	44.35	NA	NA	NA	Coil (COILS); IPR000504 (SMART); IPR012677 (G3DSA:3.30.70.GENE3D); IPR000504 (PFAM); mobidb-lite (MOBIDB_LITE); mobidb-lite (MOBIDB_LITE); mobidb-lite (MOBIDB_LITE); mobidb-lite (MOBIDB_LITE); mobidb-lite (MOBIDB_LITE); mobidb-lite (MOBIDB_LITE); mobidb-lite (MOBIDB_LITE); mobidb-lite (MOBIDB_LITE); PTHR23236:SF11 (PANTHER); PTHR23236 (PANTHER); IPR000504 (PROSITE_PROFILES); IPR035979 (SUPERFAMIL…	F:GO:0003676	F:nucleic acid binding	Q04836	1.36274e-07	---NA---	NA	144970	1.69316e-117	XP_005848501.1	XP_005848501.1 hypothetical protein CHLNCDRAFT_144970 [Chlorella variabilis]<>EFN56399.1 hypothetical protein CHLNCDRAFT_144970 [Chlorella variabilis]	554065	5.6e-95	42.9498	38.0411	70.409	28.4369	45.4121	22.4541	NA	NA	NA	NA	NA	NA
NA	OG0000040	11	3	3	g8691	724	Q8WV93	AFG1L_HUMAN AFG1-like ATPase OS=Homo sapiens OX=9606 GN=AFG1L PE=1 SV=2	1.52162e-44	45.7	NA	NA	NA	Coil (COILS); Coil (COILS); IPR005654 (PFAM); mobidb-lite (MOBIDB_LITE); mobidb-lite (MOBIDB_LITE); mobidb-lite (MOBIDB_LITE); PTHR12169:SF22 (PANTHER); IPR005654 (PANTHER); IPR027417 (SUPERFAMILY)	F:GO:0005524	F:ATP binding	Q9SKJ6	9.51761e-75	119467	2.85984e-33	22490	3.35918e-88	PRW45179.1	PRW45179.1 lactation elevated 1 [Chlorella sorokiniana]	3076	6.3e-158	30.1142	35.8952	35.1745	44.4187	55.0129	39.2126	NA	NA	NA	NA	NA	NA
2	OG0000040	11	3	3	g8692	556	Q9M876	SYYM_ARATH Tyrosine--tRNA ligase, chloroplastic/mitochondrial OS=Arabidopsis thaliana OX=3702 GN=EMB2768 PE=2 SV=1	8.04526e-178	69.2	NA	NA	NA	IPR002307 (PRINTS); IPR002942 (SMART); IPR014729 (G3DSA:3.40.50.GENE3D); IPR036986 (G3DSA:3.10.290.GENE3D); G3DSA:1.10.240.10 (GENE3D); IPR002305 (PFAM); IPR002307 (TIGRFAM); IPR002942 (PFAM); mobidb-lite (MOBIDB_LITE); mobidb-lite (MOBIDB_LITE); IPR024088 (PANTHER); IPR001412 (PROSITE_PATTERNS); IPR024107 (HAMAP); IPR002942 (PROSITE_PROFILES); IPR002307 (CDD); IPR002942 (CDD); SSF55174 (SUPERFAM…	F:GO:0000166; F:GO:0003723; F:GO:0004812; F:GO:0004831; F:GO:0005524; C:GO:0005737; P:GO:0006418; P:GO:0006437	F:nucleotide binding; F:RNA binding; F:aminoacyl-tRNA ligase activity; F:tyrosine-tRNA ligase activity; F:ATP binding; C:cytoplasm; P:tRNA aminoacylation for protein translation; P:tyrosyl-tRNA aminoacylation	Q9M876	4.44979e-179	380926	0	48743	5.16556e-163	XP_005848281.1	XP_005848281.1 hypothetical protein CHLNCDRAFT_48743 [Chlorella variabilis]<>EFN56179.1 hypothetical protein CHLNCDRAFT_48743 [Chlorella variabilis]	554065	1.9e-218	38.2873	45.3079	65.9672	65.445	83.8635	68.403	1.12053	0.0167952	1.36278	0.00339128	NA	NA
NA	OG0000041	7	5	5	g10608	87	Q9FGD1	RKD3_ARATH Protein RKD3 OS=Arabidopsis thaliana OX=3702 GN=RKD3 PE=3 SV=1	1.36619e-08	63.49	NA	NA	NA	IPR003035 (PFAM); PTHR46373 (PANTHER); IPR003035 (PROSITE_PROFILES)	no GO terms	no GO terms	Q9FGD1	7.55634e-10	195840	3.07797e-12	140028	1.72072e-19	PSC74358.1	PSC74358.1 RWP-RK domain-containing (ISS) [Micractinium conductrix]	554055	8.8e-22	32.3632	7.02297	2.04084	18.6157	3.93635	10.2413	NA	NA	NA	NA	NA	NA
NA	OG0000041	7	5	5	g11627	1019	---NA---	---NA---	NA	NA	NA	NA	NA	Coil (COILS); Coil (COILS); Coil (COILS); IPR003035 (PFAM); mobidb-lite (MOBIDB_LITE); mobidb-lite (MOBIDB_LITE); mobidb-lite (MOBIDB_LITE); mobidb-lite (MOBIDB_LITE); mobidb-lite (MOBIDB_LITE); mobidb-lite (MOBIDB_LITE); mobidb-lite (MOBIDB_LITE); mobidb-lite (MOBIDB_LITE); mobidb-lite (MOBIDB_LITE); mobidb-lite (MOBIDB_LITE); mobidb-lite (MOBIDB_LITE); mobidb-lite (MOBIDB_LITE); mobidb-lite (MO…	no GO terms	no GO terms	Q9M9U9	1.25642e-10	---NA---	NA	27756	4.70545e-26	PSC75610.1	PSC75610.1 ABC(ATP-binding) family transporter: iron compound [Micractinium conductrix]	554055	1.1e-41	83.102	75.5457	27.1912	35.4456	28.6586	48.0847	NA	NA	NA	NA	NA	NA
NA	OG0000041	7	5	5	g1692	787	---NA---	---NA---	NA	NA	NA	NA	NA	IPR003035 (PFAM); mobidb-lite (MOBIDB_LITE); mobidb-lite (MOBIDB_LITE); mobidb-lite (MOBIDB_LITE); mobidb-lite (MOBIDB_LITE); mobidb-lite (MOBIDB_LITE); mobidb-lite (MOBIDB_LITE); mobidb-lite (MOBIDB_LITE); mobidb-lite (MOBIDB_LITE); mobidb-lite (MOBIDB_LITE); mobidb-lite (MOBIDB_LITE); mobidb-lite (MOBIDB_LITE); mobidb-lite (MOBIDB_LITE); PTHR46373 (PANTHER); PTHR46373:SF5 (PANTHER); IPR003035 (…	no GO terms	no GO terms	A0A1R7T3I3	1.57673e-09	---NA---	NA	143606	0	XP_005849297.1	XP_005849297.1 hypothetical protein CHLNCDRAFT_143606 [Chlorella variabilis]<>EFN57195.1 hypothetical protein CHLNCDRAFT_143606 [Chlorella variabilis]	554065	1.2e-130	16.785	14.0459	14.1058	25.803	24.4822	14.0749	NA	NA	NA	NA	NA	NA
NA	OG0000041	7	5	5	g5686	1144	---NA---	---NA---	NA	NA	NA	NA	NA	Coil (COILS); Coil (COILS); Coil (COILS); Coil (COILS); IPR003035 (PFAM); mobidb-lite (MOBIDB_LITE); mobidb-lite (MOBIDB_LITE); mobidb-lite (MOBIDB_LITE); mobidb-lite (MOBIDB_LITE); mobidb-lite (MOBIDB_LITE); mobidb-lite (MOBIDB_LITE); mobidb-lite (MOBIDB_LITE); mobidb-lite (MOBIDB_LITE); mobidb-lite (MOBIDB_LITE); mobidb-lite (MOBIDB_LITE); mobidb-lite (MOBIDB_LITE); mobidb-lite (MOBIDB_LITE); P…	no GO terms	no GO terms	Q9M9U9	1.26588e-07	---NA---	NA	140028	0	XP_005843660.1	XP_005843660.1 hypothetical protein CHLNCDRAFT_140028 [Chlorella variabilis]<>EFN51558.1 hypothetical protein CHLNCDRAFT_140028 [Chlorella variabilis]	554065	4.7e-232	77.0682	42.2353	49.9406	44.7311	44.692	55.3686	NA	NA	NA	NA	NA	NA
NA	OG0000041	7	5	5	g647	290	Q9CA66	RKD2_ARATH Protein RKD2 OS=Arabidopsis thaliana OX=3702 GN=RKD2 PE=2 SV=1	1.22363e-07	66.67	NA	NA	NA	Coil (COILS); IPR003035 (PFAM); mobidb-lite (MOBIDB_LITE); mobidb-lite (MOBIDB_LITE); mobidb-lite (MOBIDB_LITE); PTHR46373 (PANTHER); PTHR46373:SF9 (PANTHER); IPR003035 (PROSITE_PROFILES)	no GO terms	no GO terms	Q9CA66	6.76783e-09	195838	6.20033e-09	53892	6.46876e-100	XP_005845304.1	XP_005845304.1 hypothetical protein CHLNCDRAFT_53892 [Chlorella variabilis]<>EFN53202.1 hypothetical protein CHLNCDRAFT_53892 [Chlorella variabilis]	554065	8.1e-72	1.15191	0	0.780322	0.937479	0.240022	0.931026	NA	NA	NA	NA	NA	NA
NA	OG0000042	6	6	5	g2210	251	P27517	CB2_DUNTE Chlorophyll a-b binding protein of LHCII type I, chloroplastic OS=Dunaliella tertiolecta OX=3047 PE=2 SV=1	5.92567e-117	77.38	NA	NA	NA	IPR023329 (G3DSA:1.10.3460.GENE3D); IPR022796 (PFAM); IPR001344 (PANTHER); PTHR21649:SF88 (PANTHER); SSF103511 (SUPERFAMILY)	P:GO:0009765; C:GO:0016020	P:photosynthesis, light harvesting; C:membrane	Q39142	1.68616e-116	184067	9.27949e-122	59790	0	XP_005843949.1	XP_005843949.1 hypothetical protein CHLNCDRAFT_59790 [Chlorella variabilis]<>EFN51847.1 hypothetical protein CHLNCDRAFT_59790 [Chlorella variabilis]	554065	1.6e-140	11028.7	12841.8	9728.21	11422.9	15380.5	17388.3	NA	NA	NA	NA	NA	NA
3	OG0000042	6	6	5	g444	258	P27517	CB2_DUNTE Chlorophyll a-b binding protein of LHCII type I, chloroplastic OS=Dunaliella tertiolecta OX=3047 PE=2 SV=1	4.39533e-117	75.97	NA	NA	NA	IPR023329 (G3DSA:1.10.3460.GENE3D); IPR022796 (PFAM); IPR001344 (PANTHER); PTHR21649:SF88 (PANTHER); SSF103511 (SUPERFAMILY)	P:GO:0009765; C:GO:0016020	P:photosynthesis, light harvesting; C:membrane	Q39142	6.99158e-111	184067	3.8872e-116	137219	0	XP_005845510.1	XP_005845510.1 hypothetical protein CHLNCDRAFT_137219 [Chlorella variabilis]<>EFN53408.1 hypothetical protein CHLNCDRAFT_137219 [Chlorella variabilis]	554065	1.1e-144	58.4731	5.21845	7762.4	1201.36	1369.13	2304.78	7.46663	1.33346e-05	6.34752	0.0001344	NA	NA
NA	OG0000042	6	6	5	g5029	249	Q10HD0	CB23_ORYSJ Chlorophyll a-b binding protein, chloroplastic OS=Oryza sativa subsp. japonica OX=39947 GN=RCABP89 PE=2 SV=1	2.0704e-111	76.23	NA	NA	NA	IPR023329 (G3DSA:1.10.3460.GENE3D); IPR022796 (PFAM); IPR001344 (PANTHER); PTHR21649:SF33 (PANTHER); SSF103511 (SUPERFAMILY)	P:GO:0009765; C:GO:0016020	P:photosynthesis, light harvesting; C:membrane	Q9S7J7	1.57175e-106	195162	1.77035e-120	59584	0	XP_005850667.1	XP_005850667.1 hypothetical protein CHLNCDRAFT_59584 [Chlorella variabilis]<>EFN58565.1 hypothetical protein CHLNCDRAFT_59584 [Chlorella variabilis]	554065	5.6e-130	6557.44	7178.98	5105.35	4805.96	8018.78	8403.49	NA	NA	NA	NA	NA	NA
4	OG0000042	6	6	5	g5820	248	P12328	CB21_LEMGI Chlorophyll a-b binding protein of LHCII type I, chloroplastic OS=Lemna gibba OX=4470 PE=3 SV=1	4.67738e-123	79.59	NA	NA	NA	IPR023329 (G3DSA:1.10.3460.GENE3D); IPR022796 (PFAM); PTHR21649:SF33 (PANTHER); IPR001344 (PANTHER); SSF103511 (SUPERFAMILY)	P:GO:0009765; C:GO:0016020	P:photosynthesis, light harvesting; C:membrane	Q9SHR7	6.10896e-122	184067	1.93723e-128	56227	0	XP_005846357.1	XP_005846357.1 hypothetical protein CHLNCDRAFT_56227 [Chlorella variabilis]<>EFN54255.1 hypothetical protein CHLNCDRAFT_56227 [Chlorella variabilis]	554065	2.4e-141	7114.58	8012.18	8441.28	10026.3	11948.1	15855.9	NA	NA	1.36865	0.00811928	NA	NA
2	OG0000042	6	6	5	g5821	243	P27490	CB28_PEA Chlorophyll a-b binding protein 8, chloroplastic OS=Pisum sativum OX=3888 GN=CAB8 PE=1 SV=1	1.3213e-122	85.27	NA	NA	NA	IPR022796 (PFAM); IPR023329 (G3DSA:1.10.3460.GENE3D); PTHR21649:SF88 (PANTHER); IPR001344 (PANTHER); SSF103511 (SUPERFAMILY)	P:GO:0009765; C:GO:0016020	P:photosynthesis, light harvesting; C:membrane	Q9SHR7	8.14589e-117	184067	3.52377e-126	59709	0	XP_005846356.1	XP_005846356.1 hypothetical protein CHLNCDRAFT_59709 [Chlorella variabilis]<>EFN54254.1 hypothetical protein CHLNCDRAFT_59709 [Chlorella variabilis]	554065	1.5e-135	2809.84	2867.66	3873.16	6838.51	8565.7	10283.8	1.4386	0.0141381	2.22383	0.000138055	NA	NA
4	OG0000042	6	6	5	g9943	255	Q10HD0	CB23_ORYSJ Chlorophyll a-b binding protein, chloroplastic OS=Oryza sativa subsp. japonica OX=39947 GN=RCABP89 PE=2 SV=1	1.27177e-116	82.98	NA	NA	NA	IPR023329 (G3DSA:1.10.3460.GENE3D); IPR022796 (PFAM); IPR001344 (PANTHER); PTHR21649:SF33 (PANTHER); SSF103511 (SUPERFAMILY)	P:GO:0009765; C:GO:0016020	P:photosynthesis, light harvesting; C:membrane	Q39141	2.80393e-113	184067	2.13486e-118	32733	0	XP_005844209.1	XP_005844209.1 hypothetical protein CHLNCDRAFT_32733 [Chlorella variabilis]<>EFN52107.1 hypothetical protein CHLNCDRAFT_32733 [Chlorella variabilis]	554065	2.6e-143	4601	6883.53	5752.29	5960.94	9561.4	9577.41	NA	NA	1.23005	0.0185584	NA	NA
NA	OG0000043	2	10	5	g1982	796	Q8S1X9	GT13_ORYSJ Probable glucuronosyltransferase Os01g0926400 OS=Oryza sativa subsp. japonica OX=39947 GN=Os01g0926400 PE=2 SV=1	1.06528e-23	40.59	NA	NA	NA	IPR000742 (SMART); G3DSA:2.10.25.10 (GENE3D); IPR040911 (PFAM); mobidb-lite (MOBIDB_LITE); mobidb-lite (MOBIDB_LITE); PTHR11062:SF268 (PANTHER); IPR004263 (PANTHER); IPR013032 (PROSITE_PATTERNS); IPR013032 (PROSITE_PATTERNS); IPR013032 (PROSITE_PATTERNS); IPR013032 (PROSITE_PATTERNS); IPR000742 (PROSITE_PROFILES)	P:GO:0006486; F:GO:0016757	P:protein glycosylation; F:transferase activity, transferring glycosyl groups	Q6NKR6	3.17501e-96	35571	0	51514	0	XP_005848639.1	XP_005848639.1 hypothetical protein CHLNCDRAFT_51514 [Chlorella variabilis]<>EFN56537.1 hypothetical protein CHLNCDRAFT_51514 [Chlorella variabilis]	554065	0	53.5364	45.6981	32.5334	17.455	20.4498	29.6285	NA	NA	NA	NA	NA	NA
NA	OG0000043	2	10	5	g3322	831	Q6NMM8	F8H_ARATH Probable glucuronoxylan glucuronosyltransferase F8H OS=Arabidopsis thaliana OX=3702 GN=F8H PE=2 SV=1	2.62939e-30	46.58	1	F:GO:0045735	F:nutrient reservoir activity	IPR040911 (PFAM); G3DSA:2.10.25.10 (GENE3D); IPR004263 (PANTHER); PTHR11062:SF268 (PANTHER); IPR013032 (PROSITE_PATTERNS)	P:GO:0006486; F:GO:0016757	P:protein glycosylation; F:transferase activity, transferring glycosyl groups	Q6NKR6	2.1339e-102	8449	7.38605e-168	134888	0	XP_005846949.1	XP_005846949.1 hypothetical protein CHLNCDRAFT_134888 [Chlorella variabilis]<>EFN54847.1 hypothetical protein CHLNCDRAFT_134888 [Chlorella variabilis]	554065	0	56.8824	59.744	43.5179	25.5798	30.6268	42.0057	NA	NA	NA	NA	NA	NA
NA	OG0000043	2	10	5	g4259	882	Q8S1X9	GT13_ORYSJ Probable glucuronosyltransferase Os01g0926400 OS=Oryza sativa subsp. japonica OX=39947 GN=Os01g0926400 PE=2 SV=1	9.16347e-30	43.37	NA	NA	NA	IPR000742 (SMART); IPR040911 (PFAM); mobidb-lite (MOBIDB_LITE); mobidb-lite (MOBIDB_LITE); mobidb-lite (MOBIDB_LITE); mobidb-lite (MOBIDB_LITE); mobidb-lite (MOBIDB_LITE); mobidb-lite (MOBIDB_LITE); IPR004263 (PANTHER); PTHR11062:SF268 (PANTHER); IPR013032 (PROSITE_PATTERNS); IPR013032 (PROSITE_PATTERNS); IPR013032 (PROSITE_PATTERNS); IPR000742 (PROSITE_PROFILES); SSF57196 (SUPERFAMILY)	P:GO:0006486; F:GO:0016757	P:protein glycosylation; F:transferase activity, transferring glycosyl groups	Q6NKR6	5.69625e-88	169942	3.22725e-179	52572	0	XP_005847469.1	XP_005847469.1 hypothetical protein CHLNCDRAFT_52572 [Chlorella variabilis]<>EFN55367.1 hypothetical protein CHLNCDRAFT_52572 [Chlorella variabilis]	554065	0	25.3969	35.7001	20.7085	11.6962	10.753	20.8659	NA	NA	NA	NA	NA	NA
NA	OG0000043	2	10	5	g6531	868	Q6NMM8	F8H_ARATH Probable glucuronoxylan glucuronosyltransferase F8H OS=Arabidopsis thaliana OX=3702 GN=F8H PE=2 SV=1	5.023e-31	45.62	1	F:GO:0045735	F:nutrient reservoir activity	Coil (COILS); G3DSA:2.10.25.10 (GENE3D); IPR040911 (PFAM); mobidb-lite (MOBIDB_LITE); mobidb-lite (MOBIDB_LITE); IPR004263 (PANTHER); PTHR11062:SF268 (PANTHER); IPR013032 (PROSITE_PATTERNS); IPR013032 (PROSITE_PATTERNS)	P:GO:0006486; F:GO:0016757	P:protein glycosylation; F:transferase activity, transferring glycosyl groups	Q6NKR6	2.8701e-92	169942	1.08501e-167	133704	0	XP_005851973.1	XP_005851973.1 hypothetical protein CHLNCDRAFT_133704 [Chlorella variabilis]<>EFN59871.1 hypothetical protein CHLNCDRAFT_133704 [Chlorella variabilis]	554065	0	55.7305	87.0068	45.3187	27.9458	37.2994	57.8879	NA	NA	NA	NA	NA	NA
NA	OG0000043	2	10	5	g7394	868	Q8S1X8	GT14_ORYSJ Probable glucuronosyltransferase Os01g0926600 OS=Oryza sativa subsp. japonica OX=39947 GN=Os01g0926600 PE=2 SV=1	7.70082e-31	44.13	NA	NA	NA	IPR000742 (SMART); IPR040911 (PFAM); mobidb-lite (MOBIDB_LITE); mobidb-lite (MOBIDB_LITE); mobidb-lite (MOBIDB_LITE); mobidb-lite (MOBIDB_LITE); mobidb-lite (MOBIDB_LITE); IPR004263 (PANTHER); PTHR11062:SF268 (PANTHER); IPR013032 (PROSITE_PATTERNS); IPR013032 (PROSITE_PATTERNS); IPR000742 (PROSITE_PROFILES)	P:GO:0006486; F:GO:0016757	P:protein glycosylation; F:transferase activity, transferring glycosyl groups	Q6NKR6	2.34536e-100	169942	1.14443e-179	52572	0	XP_005847469.1	XP_005847469.1 hypothetical protein CHLNCDRAFT_52572 [Chlorella variabilis]<>EFN55367.1 hypothetical protein CHLNCDRAFT_52572 [Chlorella variabilis]	554065	5.8e-267	42.0173	53.9891	26.1108	14.0175	19.2017	28.0951	NA	NA	NA	NA	NA	NA
NA	OG0000043	2	10	5	g9317	780	Q6NMM8	F8H_ARATH Probable glucuronoxylan glucuronosyltransferase F8H OS=Arabidopsis thaliana OX=3702 GN=F8H PE=2 SV=1	1.17626e-23	42.24	1	F:GO:0045735	F:nutrient reservoir activity	G3DSA:2.10.25.10 (GENE3D); IPR040911 (PFAM); mobidb-lite (MOBIDB_LITE); PTHR11062:SF268 (PANTHER); IPR004263 (PANTHER)	P:GO:0006486; F:GO:0016757	P:protein glycosylation; F:transferase activity, transferring glycosyl groups	Q6NKR6	7.05789e-82	193010	1.07145e-173	133110	0	XP_005851742.1	XP_005851742.1 hypothetical protein CHLNCDRAFT_133110 [Chlorella variabilis]<>EFN59640.1 hypothetical protein CHLNCDRAFT_133110 [Chlorella variabilis]	554065	0	51.452	51.6481	46.7593	30.5797	35.0912	39.4864	NA	NA	NA	NA	NA	NA
2	OG0000043	2	10	5	g9327	779	Q9ZUV3	IRX7_ARATH Probable glucuronoxylan glucuronosyltransferase IRX7 OS=Arabidopsis thaliana OX=3702 GN=IRX7 PE=2 SV=1	1.471e-26	41.86	NA	NA	NA	IPR000742 (SMART); IPR040911 (PFAM); mobidb-lite (MOBIDB_LITE); mobidb-lite (MOBIDB_LITE); IPR004263 (PANTHER); PTHR11062:SF268 (PANTHER); IPR013032 (PROSITE_PATTERNS); IPR013032 (PROSITE_PATTERNS); IPR000742 (PROSITE_PROFILES)	P:GO:0006486; F:GO:0016757	P:protein glycosylation; F:transferase activity, transferring glycosyl groups	Q6NKR6	1.68043e-84	35571	2.09914e-174	133110	0	XP_005851742.1	XP_005851742.1 hypothetical protein CHLNCDRAFT_133110 [Chlorella variabilis]<>EFN59640.1 hypothetical protein CHLNCDRAFT_133110 [Chlorella variabilis]	554065	8.6e-294	24.5192	25.946	25.6906	41.5169	55.637	28.2594	NA	NA	1.2389	0.0477532	NA	NA
NA	OG0000043	2	10	5	g9484	740	Q6NMM8	F8H_ARATH Probable glucuronoxylan glucuronosyltransferase F8H OS=Arabidopsis thaliana OX=3702 GN=F8H PE=2 SV=1	2.09116e-22	41.28	1	F:GO:0045735	F:nutrient reservoir activity	IPR040911 (PFAM); G3DSA:2.10.25.10 (GENE3D); PTHR11062:SF268 (PANTHER); IPR004263 (PANTHER)	P:GO:0006486; F:GO:0016757	P:protein glycosylation; F:transferase activity, transferring glycosyl groups	Q6NKR6	6.95153e-86	169942	1.04563e-171	138314	0	XP_005844843.1	XP_005844843.1 hypothetical protein CHLNCDRAFT_138314 [Chlorella variabilis]<>EFN52741.1 hypothetical protein CHLNCDRAFT_138314 [Chlorella variabilis]	554065	0	19.5276	26.4824	29.5322	24.553	14.2573	25.302	NA	NA	NA	NA	NA	NA
NA	OG0000043	2	10	5	g9635	767	Q6NMM8	F8H_ARATH Probable glucuronoxylan glucuronosyltransferase F8H OS=Arabidopsis thaliana OX=3702 GN=F8H PE=2 SV=1	6.69422e-23	42.52	1	F:GO:0045735	F:nutrient reservoir activity	IPR000742 (SMART); IPR040911 (PFAM); mobidb-lite (MOBIDB_LITE); IPR004263 (PANTHER); PTHR11062:SF268 (PANTHER); IPR013032 (PROSITE_PATTERNS); IPR000742 (PROSITE_PROFILES)	P:GO:0006486; F:GO:0016757	P:protein glycosylation; F:transferase activity, transferring glycosyl groups	Q6NKR6	4.98021e-97	193010	0	140476	0	XP_005850568.1	XP_005850568.1 hypothetical protein CHLNCDRAFT_140476 [Chlorella variabilis]<>EFN58466.1 hypothetical protein CHLNCDRAFT_140476 [Chlorella variabilis]	554065	0	50.684	61.7924	36.435	18.9728	24.4342	31.6001	NA	NA	NA	NA	NA	NA
NA	OG0000043	2	10	5	g9919	427	Q6NMM8	F8H_ARATH Probable glucuronoxylan glucuronosyltransferase F8H OS=Arabidopsis thaliana OX=3702 GN=F8H PE=2 SV=1	3.05395e-09	38.64	1	F:GO:0045735	F:nutrient reservoir activity	IPR040911 (PFAM); IPR004263 (PANTHER); PTHR11062:SF268 (PANTHER)	P:GO:0006486; F:GO:0016757	P:protein glycosylation; F:transferase activity, transferring glycosyl groups	Q6NKR6	4.18497e-47	193010	1.96639e-84	134888	0	XP_005846949.1	XP_005846949.1 hypothetical protein CHLNCDRAFT_134888 [Chlorella variabilis]<>EFN54847.1 hypothetical protein CHLNCDRAFT_134888 [Chlorella variabilis]	554065	9.2e-173	1024.38	1025.45	406.067	808.732	742.003	1219.64	NA	NA	NA	NA	NA	NA
1	OG0000044	14	2	1	g3866	330	P41413	PCSK5_RAT Proprotein convertase subtilisin/kexin type 5 OS=Rattus norvegicus OX=10116 GN=Pcsk5 PE=2 SV=3	5.80482e-06	35.56	6	F:GO:0003824; P:GO:0009399; F:GO:0016740; F:GO:0031071; F:GO:0046872; F:GO:0051536	F:catalytic activity; P:nitrogen fixation; F:transferase activity; F:cysteine desulfurase activity; F:metal ion binding; F:iron-sulfur cluster binding	IPR006212 (SMART); IPR000742 (SMART); IPR009030 (SUPERFAMILY)	no GO terms	no GO terms	---NA---	NA	---NA---	NA	143708	9.10322e-70	XP_005849329.1	XP_005849329.1 hypothetical protein CHLNCDRAFT_143708 [Chlorella variabilis]<>EFN57227.1 hypothetical protein CHLNCDRAFT_143708 [Chlorella variabilis]	554065	6.2e-44	22.9833	44.7226	2.64109	4.24098	2.01618	6.29811	-2.78547	0.000317719	-2.55087	0.00103861	NA	NA
NA	OG0000044	14	2	1	g9582	308	---NA---	---NA---	NA	NA	NA	NA	NA	IPR009030 (SUPERFAMILY)	no GO terms	no GO terms	---NA---	NA	---NA---	NA	140971	0	XP_005843482.1	XP_005843482.1 hypothetical protein CHLNCDRAFT_140971 [Chlorella variabilis]<>EFN51380.1 hypothetical protein CHLNCDRAFT_140971 [Chlorella variabilis]	554065	9.2e-199	19.747	17.216	14.7061	6.42843	8.9288	9.03642	NA	NA	NA	NA	NA	NA
1	OG0000045	11	3	3	g110	638	---NA---	---NA---	NA	NA	NA	NA	NA	mobidb-lite (MOBIDB_LITE); mobidb-lite (MOBIDB_LITE); mobidb-lite (MOBIDB_LITE); mobidb-lite (MOBIDB_LITE); mobidb-lite (MOBIDB_LITE); mobidb-lite (MOBIDB_LITE); mobidb-lite (MOBIDB_LITE); mobidb-lite (MOBIDB_LITE); mobidb-lite (MOBIDB_LITE)	no GO terms	no GO terms	---NA---	NA	---NA---	NA	---NA---	NA	PSC75284.1	PSC75284.1 hypothetical protein C2E20_1178 [Micractinium conductrix]	554055	8.1e-08	23.4222	22.8246	10.3243	3.70527	5.08846	7.28391	-1.34536	0.0251462	-1.41193	0.0191424	NA	NA
NA	OG0000045	11	3	3	g80	321	---NA---	---NA---	NA	NA	NA	NA	NA	mobidb-lite (MOBIDB_LITE)	no GO terms	no GO terms	---NA---	NA	---NA---	NA	51047	3.04304e-85	XP_005849863.1	XP_005849863.1 hypothetical protein CHLNCDRAFT_51047 [Chlorella variabilis]<>EFN57761.1 hypothetical protein CHLNCDRAFT_51047 [Chlorella variabilis]	554065	1.8e-117	12.1225	16.4845	5.5823	6.24986	2.2082	5.85998	NA	NA	NA	NA	NA	NA
NA	OG0000045	11	3	3	g87	1400	---NA---	---NA---	NA	NA	NA	NA	NA	Coil (COILS); Coil (COILS); mobidb-lite (MOBIDB_LITE); mobidb-lite (MOBIDB_LITE); mobidb-lite (MOBIDB_LITE); mobidb-lite (MOBIDB_LITE); mobidb-lite (MOBIDB_LITE); mobidb-lite (MOBIDB_LITE); mobidb-lite (MOBIDB_LITE); mobidb-lite (MOBIDB_LITE); PTHR12549 (PANTHER); PTHR12549:SF11 (PANTHER)	no GO terms	no GO terms	---NA---	NA	---NA---	NA	143055	0	XP_005849601.1	XP_005849601.1 hypothetical protein CHLNCDRAFT_143055 [Chlorella variabilis]<>EFN57499.1 hypothetical protein CHLNCDRAFT_143055 [Chlorella variabilis]	554065	5.3e-201	175.419	159.919	78.4524	55.2666	95.5766	80.8897	NA	NA	NA	NA	NA	NA
NA	OG0000046	0	2	15	g2117	342	---NA---	---NA---	NA	NA	NA	NA	NA	mobidb-lite (MOBIDB_LITE); SSF52075 (SUPERFAMILY)	no GO terms	no GO terms	---NA---	NA	---NA---	NA	141839	2.89779e-19	XP_005842909.1	XP_005842909.1 hypothetical protein CHLNCDRAFT_59425 [Chlorella variabilis]<>EFN50807.1 hypothetical protein CHLNCDRAFT_59425 [Chlorella variabilis]	554065	3e-09	24.245	15.3627	9.66399	7.54448	9.88889	11.8295	NA	NA	NA	NA	NA	NA
NA	OG0000046	0	2	15	g7276	142	---NA---	---NA---	NA	NA	NA	NA	NA	mobidb-lite (MOBIDB_LITE)	no GO terms	no GO terms	---NA---	NA	---NA---	NA	139801	5.61091e-23	XP_005843980.1	XP_005843980.1 hypothetical protein CHLNCDRAFT_139801 [Chlorella variabilis]<>EFN51878.1 hypothetical protein CHLNCDRAFT_139801 [Chlorella variabilis]	554065	1.2e-15	0	0	0	0	0	0	NA	NA	NA	NA	NA	NA
1	OG0000047	6	6	4	g1637	619	---NA---	---NA---	NA	NA	NA	NA	NA	IPR040703 (PFAM); mobidb-lite (MOBIDB_LITE); PTHR38016 (PANTHER)	no GO terms	no GO terms	---NA---	NA	135713	7.22971e-111	53648	0	XP_005845923.1	XP_005845923.1 hypothetical protein CHLNCDRAFT_53648 [Chlorella variabilis]<>EFN53821.1 hypothetical protein CHLNCDRAFT_53648 [Chlorella variabilis]	554065	6.4e-159	100.545	121.097	10.6244	12.8122	1.58414	2.08112	-2.75376	2.09742e-08	-5.42552	1.74542e-23	-2.67176	3.56343e-05
NA	OG0000047	6	6	4	g6608	1166	A0A1B4XBG9	SDND_SORAA Methyltransferase sdnD OS=Sordaria araneosa OX=573841 GN=sdnD PE=3 SV=1	1.8956e-35	54.19	5	F:GO:0004352; P:GO:0006520; F:GO:0016491; P:GO:0019551; P:GO:0055114	F:glutamate dehydrogenase (NAD+) activity; P:cellular amino acid metabolic process; F:oxidoreductase activity; P:glutamate catabolic process to 2-oxoglutarate; P:oxidation-reduction process	G3DSA:3.40.50.2000 (GENE3D); G3DSA:3.40.50.2000 (GENE3D); IPR006342 (TIGRFAM); IPR040703 (PFAM); IPR006342 (PFAM); IPR004276 (PFAM); G3DSA:3.40.50.150 (GENE3D); PTHR38016 (PANTHER); cd03784 (CDD); IPR029063 (SUPERFAMILY); SSF53756 (SUPERFAMILY)	P:GO:0005975; F:GO:0016758; P:GO:0030259	P:carbohydrate metabolic process; F:transferase activity, transferring hexosyl groups; P:lipid glycosylation	F4KII1	2.02831e-61	161422	4.11089e-114	145145	0	XP_005848573.1	XP_005848573.1 hypothetical protein CHLNCDRAFT_145145 [Chlorella variabilis]<>EFN56471.1 hypothetical protein CHLNCDRAFT_145145 [Chlorella variabilis]	554065	0	223.964	158.456	426.056	167.407	229.365	217.258	NA	NA	NA	NA	NA	NA
3	OG0000047	6	6	4	g7704	488	---NA---	---NA---	NA	NA	NA	NA	NA	IPR040703 (PFAM); PTHR38016 (PANTHER)	no GO terms	no GO terms	---NA---	NA	135713	2.9278e-124	53648	0	XP_005845923.1	XP_005845923.1 hypothetical protein CHLNCDRAFT_53648 [Chlorella variabilis]<>EFN53821.1 hypothetical protein CHLNCDRAFT_53648 [Chlorella variabilis]	554065	2.6e-208	34.1185	21.3615	25.0303	289.681	35.0912	123.717	3.13151	0.0375339	NA	NA	NA	NA
NA	OG0000047	6	6	4	g7705	512	---NA---	---NA---	NA	NA	NA	NA	NA	IPR040703 (PFAM); PTHR38016 (PANTHER)	no GO terms	no GO terms	---NA---	NA	135713	2.87137e-124	58491	0	XP_005845923.1	XP_005845923.1 hypothetical protein CHLNCDRAFT_53648 [Chlorella variabilis]<>EFN53821.1 hypothetical protein CHLNCDRAFT_53648 [Chlorella variabilis]	554065	1.6e-200	1031.95	970.242	384.098	1765.76	177.616	689.78	NA	NA	NA	NA	NA	NA
NA	OG0000047	6	6	4	g7711	468	---NA---	---NA---	NA	NA	NA	NA	NA	IPR040703 (PFAM); PTHR38016 (PANTHER)	no GO terms	no GO terms	---NA---	NA	135713	8.55845e-127	53648	0	XP_005845923.1	XP_005845923.1 hypothetical protein CHLNCDRAFT_53648 [Chlorella variabilis]<>EFN53821.1 hypothetical protein CHLNCDRAFT_53648 [Chlorella variabilis]	554065	2e-258	2108.27	2110.74	602.649	2235.58	275.929	898.987	NA	NA	NA	NA	NA	NA
NA	OG0000047	6	6	4	g9247	932	---NA---	---NA---	NA	NA	NA	NA	NA	Coil (COILS); IPR021109 (G3DSA:2.40.70.GENE3D); PF13650 (PFAM); IPR040703 (PFAM); mobidb-lite (MOBIDB_LITE); mobidb-lite (MOBIDB_LITE); mobidb-lite (MOBIDB_LITE); mobidb-lite (MOBIDB_LITE); PTHR38016 (PANTHER); IPR034122 (CDD)	no GO terms	no GO terms	---NA---	NA	161422	1.9825e-108	133181	0	XP_005851774.1	XP_005851774.1 expressed protein [Chlorella variabilis]<>EFN59672.1 expressed protein [Chlorella variabilis]	554065	4.6e-193	210.799	348.222	51.6813	450.436	56.5971	161.286	NA	NA	NA	NA	NA	NA
NA	OG0000048	5	8	3	g1764	823	---NA---	---NA---	NA	NA	NA	NA	NA	mobidb-lite (MOBIDB_LITE); mobidb-lite (MOBIDB_LITE); mobidb-lite (MOBIDB_LITE); mobidb-lite (MOBIDB_LITE); IPR011050 (SUPERFAMILY)	no GO terms	no GO terms	---NA---	NA	---NA---	NA	141130	0	XP_005843438.1	XP_005843438.1 hypothetical protein CHLNCDRAFT_141130 [Chlorella variabilis]<>EFN51336.1 hypothetical protein CHLNCDRAFT_141130 [Chlorella variabilis]	554065	2.6e-184	22.5445	19.7033	21.849	16.9639	21.6019	26.1782	NA	NA	NA	NA	NA	NA
NA	OG0000048	5	8	3	g2090	687	Q8GWJ6	MUB6_ARATH Membrane-anchored ubiquitin-fold protein 6 OS=Arabidopsis thaliana OX=3702 GN=MUB6 PE=1 SV=1	1.48565e-14	53.51	NA	NA	NA	IPR039540 (PFAM); G3DSA:3.10.20.90 (GENE3D); IPR040015 (PANTHER); IPR029071 (SUPERFAMILY); IPR011050 (SUPERFAMILY)	no GO terms	no GO terms	Q8GWJ6	8.21705e-16	187189	5.773e-18	145617	0	XP_005848024.1	XP_005848024.1 hypothetical protein CHLNCDRAFT_145617 [Chlorella variabilis]<>EFN55922.1 hypothetical protein CHLNCDRAFT_145617 [Chlorella variabilis]	554065	0	105.701	117.147	73.8905	61.5611	70.7584	63.6931	NA	NA	NA	NA	NA	NA
2	OG0000048	5	8	3	g2091	458	---NA---	---NA---	NA	NA	NA	NA	NA	mobidb-lite (MOBIDB_LITE); mobidb-lite (MOBIDB_LITE); IPR011050 (SUPERFAMILY)	no GO terms	no GO terms	---NA---	NA	---NA---	NA	145616	0	XP_005848023.1	XP_005848023.1 hypothetical protein CHLNCDRAFT_145616 [Chlorella variabilis]<>EFN55921.1 hypothetical protein CHLNCDRAFT_145616 [Chlorella variabilis]	554065	1.3e-236	21.8863	16.9722	35.4146	89.7301	60.4374	76.0703	2.24065	0.000664153	2.30588	0.000518396	NA	NA
NA	OG0000048	5	8	3	g2414	479	---NA---	---NA---	NA	NA	NA	NA	NA	mobidb-lite (MOBIDB_LITE); IPR011050 (SUPERFAMILY)	no GO terms	no GO terms	---NA---	NA	---NA---	NA	141582	0	XP_005843061.1	XP_005843061.1 hypothetical protein CHLNCDRAFT_141582 [Chlorella variabilis]<>EFN50959.1 hypothetical protein CHLNCDRAFT_141582 [Chlorella variabilis]	554065	1.7e-191	16.1267	26.2386	25.3905	9.0623	10.657	9.63885	NA	NA	NA	NA	NA	NA
NA	OG0000048	5	8	3	g9391	1009	---NA---	---NA---	NA	NA	NA	NA	NA	IPR012334 (G3DSA:2.160.20.GENE3D); mobidb-lite (MOBIDB_LITE); mobidb-lite (MOBIDB_LITE); mobidb-lite (MOBIDB_LITE); IPR011050 (SUPERFAMILY)	no GO terms	no GO terms	---NA---	NA	---NA---	NA	133037	0	XP_005851713.1	XP_005851713.1 hypothetical protein CHLNCDRAFT_133037 [Chlorella variabilis]<>EFN59611.1 hypothetical protein CHLNCDRAFT_133037 [Chlorella variabilis]	554065	0	27.4813	30.4816	38.4158	22.0084	34.8511	33.2979	NA	NA	NA	NA	NA	NA
NA	OG0000048	5	8	3	g9393	541	---NA---	---NA---	NA	NA	NA	NA	NA	IPR011050 (SUPERFAMILY)	no GO terms	no GO terms	---NA---	NA	---NA---	NA	133036	0	XP_005852054.1	XP_005852054.1 hypothetical protein CHLNCDRAFT_133036 [Chlorella variabilis]<>EFN59952.1 hypothetical protein CHLNCDRAFT_133036 [Chlorella variabilis]	554065	1.8e-218	22.7091	38.2362	45.4387	18.6603	12.5291	15.2798	NA	NA	NA	NA	NA	NA
NA	OG0000048	5	8	3	g9394	533	---NA---	---NA---	NA	NA	NA	NA	NA	IPR011050 (SUPERFAMILY)	no GO terms	no GO terms	---NA---	NA	---NA---	NA	133034	0	XP_005852052.1	XP_005852052.1 hypothetical protein CHLNCDRAFT_133034 [Chlorella variabilis]<>EFN59950.1 hypothetical protein CHLNCDRAFT_133034 [Chlorella variabilis]	554065	1.8e-295	62.0386	80.6178	60.9851	51.2935	41.3317	47.2085	NA	NA	NA	NA	NA	NA
NA	OG0000048	5	8	3	g9395	553	---NA---	---NA---	NA	NA	NA	NA	NA	IPR011050 (SUPERFAMILY)	no GO terms	no GO terms	---NA---	NA	---NA---	NA	133037	0	XP_005851713.1	XP_005851713.1 hypothetical protein CHLNCDRAFT_133037 [Chlorella variabilis]<>EFN59611.1 hypothetical protein CHLNCDRAFT_133037 [Chlorella variabilis]	554065	2.5e-162	7.24057	9.36396	15.6665	4.59811	7.7767	8.21493	NA	NA	NA	NA	NA	NA
1	OG0000050	3	11	2	g1572	338	---NA---	---NA---	NA	NA	NA	NA	NA	mobidb-lite (MOBIDB_LITE); mobidb-lite (MOBIDB_LITE); mobidb-lite (MOBIDB_LITE); mobidb-lite (MOBIDB_LITE)	no GO terms	no GO terms	---NA---	NA	---NA---	NA	51047	6.50261e-09	NA	NA	NA	NA	71.9121	70.9125	13.2054	6.2945	5.66451	14.294	-2.47286	2.92342e-05	-2.35773	7.74354e-05	NA	NA
1	OG0000050	3	11	2	g5316	415	---NA---	---NA---	NA	NA	NA	NA	NA	mobidb-lite (MOBIDB_LITE); mobidb-lite (MOBIDB_LITE); mobidb-lite (MOBIDB_LITE); mobidb-lite (MOBIDB_LITE); mobidb-lite (MOBIDB_LITE); mobidb-lite (MOBIDB_LITE)	no GO terms	no GO terms	---NA---	NA	---NA---	NA	51050	6.01005e-57	XP_005849603.1	XP_005849603.1 hypothetical protein CHLNCDRAFT_51050 [Chlorella variabilis]<>EFN57501.1 hypothetical protein CHLNCDRAFT_51050 [Chlorella variabilis]	554065	5e-67	2.85235	2.34099	0	0.758912	0.144013	0.219065	NA	NA	-3.31269	0.00937637	NA	NA
NA	OG0000050	3	11	2	g5317	175	---NA---	---NA---	NA	NA	NA	NA	NA	mobidb-lite (MOBIDB_LITE); mobidb-lite (MOBIDB_LITE); mobidb-lite (MOBIDB_LITE)	no GO terms	no GO terms	---NA---	NA	---NA---	NA	51050	8.90113e-109	XP_005849603.1	XP_005849603.1 hypothetical protein CHLNCDRAFT_51050 [Chlorella variabilis]<>EFN57501.1 hypothetical protein CHLNCDRAFT_51050 [Chlorella variabilis]	554065	3.5e-70	1.09706	0.536477	0.12005	0.267851	0	0.273831	NA	NA	NA	NA	NA	NA
NA	OG0000050	3	11	2	g5319	186	---NA---	---NA---	NA	NA	NA	NA	NA	mobidb-lite (MOBIDB_LITE); mobidb-lite (MOBIDB_LITE); mobidb-lite (MOBIDB_LITE); mobidb-lite (MOBIDB_LITE)	no GO terms	no GO terms	---NA---	NA	---NA---	NA	51050	1.33908e-114	XP_005849603.1	XP_005849603.1 hypothetical protein CHLNCDRAFT_51050 [Chlorella variabilis]<>EFN57501.1 hypothetical protein CHLNCDRAFT_51050 [Chlorella variabilis]	554065	2.4e-61	1.81014	1.56066	0.660272	0.71427	2.06419	1.64299	NA	NA	NA	NA	NA	NA
NA	OG0000050	3	11	2	g5320	176	---NA---	---NA---	NA	NA	NA	NA	NA	mobidb-lite (MOBIDB_LITE); mobidb-lite (MOBIDB_LITE)	no GO terms	no GO terms	---NA---	NA	---NA---	NA	51050	1.90644e-65	XP_005849603.1	XP_005849603.1 hypothetical protein CHLNCDRAFT_51050 [Chlorella variabilis]<>EFN57501.1 hypothetical protein CHLNCDRAFT_51050 [Chlorella variabilis]	554065	3.9e-37	16.8398	18.4841	8.70359	13.9283	8.9288	11.5009	NA	NA	NA	NA	NA	NA
NA	OG0000050	3	11	2	g5322	73	---NA---	---NA---	NA	NA	NA	NA	NA	no IPS match	no IPS match	no IPS match	---NA---	NA	---NA---	NA	51050	9.8361e-36	XP_005849603.1	XP_005849603.1 hypothetical protein CHLNCDRAFT_51050 [Chlorella variabilis]<>EFN57501.1 hypothetical protein CHLNCDRAFT_51050 [Chlorella variabilis]	554065	5.4e-25	0.987351	0.634018	0.480198	0.357135	0.576052	0.711961	NA	NA	NA	NA	NA	NA
NA	OG0000050	3	11	2	g5323	176	---NA---	---NA---	NA	NA	NA	NA	NA	mobidb-lite (MOBIDB_LITE); mobidb-lite (MOBIDB_LITE)	no GO terms	no GO terms	---NA---	NA	---NA---	NA	51050	3.92858e-68	XP_005849603.1	XP_005849603.1 hypothetical protein CHLNCDRAFT_51050 [Chlorella variabilis]<>EFN57501.1 hypothetical protein CHLNCDRAFT_51050 [Chlorella variabilis]	554065	6.5e-40	0.877645	0.341394	0.0600248	0.178567	0.0960086	0.43813	NA	NA	NA	NA	NA	NA
1	OG0000050	3	11	2	g79	126	---NA---	---NA---	NA	NA	NA	NA	NA	mobidb-lite (MOBIDB_LITE)	no GO terms	no GO terms	---NA---	NA	---NA---	NA	51047	6.45628e-54	XP_005849863.1	XP_005849863.1 hypothetical protein CHLNCDRAFT_51047 [Chlorella variabilis]<>EFN57761.1 hypothetical protein CHLNCDRAFT_51047 [Chlorella variabilis]	554065	1.3e-34	22.5994	14.0459	4.68193	2.7678	2.2562	5.09326	-1.87473	0.00360854	-1.83211	0.00469936	NA	NA
1	OG0000050	3	11	2	g81	449	---NA---	---NA---	NA	NA	NA	NA	NA	Coil (COILS); mobidb-lite (MOBIDB_LITE); mobidb-lite (MOBIDB_LITE); mobidb-lite (MOBIDB_LITE); mobidb-lite (MOBIDB_LITE)	no GO terms	no GO terms	---NA---	NA	---NA---	NA	51047	0	XP_005849863.1	XP_005849863.1 hypothetical protein CHLNCDRAFT_51047 [Chlorella variabilis]<>EFN57761.1 hypothetical protein CHLNCDRAFT_51047 [Chlorella variabilis]	554065	2.8e-87	71.9669	76.1309	23.5897	17.0978	18.7697	30.6143	-1.42548	0.00267504	-1.09699	0.0236634	NA	NA
1	OG0000050	3	11	2	g82	318	---NA---	---NA---	NA	NA	NA	NA	NA	mobidb-lite (MOBIDB_LITE); mobidb-lite (MOBIDB_LITE); mobidb-lite (MOBIDB_LITE)	no GO terms	no GO terms	---NA---	NA	---NA---	NA	51047	2.86375e-56	XP_005849863.1	XP_005849863.1 hypothetical protein CHLNCDRAFT_51047 [Chlorella variabilis]<>EFN57761.1 hypothetical protein CHLNCDRAFT_51047 [Chlorella variabilis]	554065	4.6e-36	6.25322	8.97379	2.52104	1.51782	1.39213	3.23121	-1.49424	0.0325602	NA	NA	NA	NA
2	OG0000050	3	11	2	g97	1258	---NA---	---NA---	NA	NA	NA	NA	NA	Coil (COILS); mobidb-lite (MOBIDB_LITE); mobidb-lite (MOBIDB_LITE); PTHR23202 (PANTHER)	no GO terms	no GO terms	---NA---	NA	---NA---	NA	51047	1.54197e-10	PRW56260.1	PRW56260.1 hypothetical protein C2E21_4941 [Chlorella sorokiniana]	3076	9.2e-88	262.416	231.66	420.473	364.769	516.574	423.233	1.1252	0.0242477	1.42719	0.00390755	NA	NA
NA	OG0000051	7	7	2	g1772	416	---NA---	---NA---	NA	NA	NA	NA	NA	SSF103481 (SUPERFAMILY)	no GO terms	no GO terms	---NA---	NA	---NA---	NA	139635	5.79953e-52	PSC71321.1	PSC71321.1 multidrug transporter [Micractinium conductrix]	554055	7.7e-116	23.477	20.3861	19.0278	7.72304	18.5297	15.225	NA	NA	NA	NA	NA	NA
2	OG0000051	7	7	2	g3423	467	---NA---	---NA---	NA	NA	NA	NA	NA	mobidb-lite (MOBIDB_LITE); mobidb-lite (MOBIDB_LITE); PTHR11132 (PANTHER); SSF103481 (SUPERFAMILY)	no GO terms	no GO terms	---NA---	NA	---NA---	NA	132986	0	XP_005851699.1	XP_005851699.1 hypothetical protein CHLNCDRAFT_132986 [Chlorella variabilis]<>EFN59597.1 hypothetical protein CHLNCDRAFT_132986 [Chlorella variabilis]	554065	8.5e-172	146.896	79.4473	178.213	188.88	175.888	274.653	1.17686	0.0406623	1.48541	0.0089536	NA	NA
NA	OG0000051	7	7	2	g357	777	---NA---	---NA---	NA	NA	NA	NA	NA	IPR036420 (G3DSA:3.40.50.GENE3D); mobidb-lite (MOBIDB_LITE); mobidb-lite (MOBIDB_LITE); mobidb-lite (MOBIDB_LITE); PTHR11132 (PANTHER); IPR001357 (PROSITE_PROFILES); IPR036420 (SUPERFAMILY)	no GO terms	no GO terms	---NA---	NA	---NA---	NA	139635	5.09778e-92	XP_005844062.1	XP_005844062.1 hypothetical protein CHLNCDRAFT_139635 [Chlorella variabilis]<>EFN51960.1 hypothetical protein CHLNCDRAFT_139635 [Chlorella variabilis]	554065	6.7e-73	180.027	211.518	311.709	237.182	117.035	214.957	NA	NA	NA	NA	NA	NA
3	OG0000051	7	7	2	g359	433	---NA---	---NA---	NA	NA	NA	NA	NA	no IPS match	no IPS match	no IPS match	---NA---	NA	---NA---	NA	139635	4.62256e-165	XP_005844227.1	XP_005844227.1 hypothetical protein CHLNCDRAFT_58969 [Chlorella variabilis]<>EFN52125.1 hypothetical protein CHLNCDRAFT_58969 [Chlorella variabilis]	554065	2.2e-145	89.7392	67.8887	151.322	210.799	128.027	159.37	1.70318	0.00129601	1.36034	0.0113861	NA	NA
3	OG0000051	7	7	2	g360	250	---NA---	---NA---	NA	NA	NA	NA	NA	mobidb-lite (MOBIDB_LITE)	no GO terms	no GO terms	---NA---	NA	---NA---	NA	139635	1.25828e-150	XP_005844062.1	XP_005844062.1 hypothetical protein CHLNCDRAFT_139635 [Chlorella variabilis]<>EFN51960.1 hypothetical protein CHLNCDRAFT_139635 [Chlorella variabilis]	554065	1.1e-117	73.1188	48.5755	138.597	138.836	105.898	139.599	1.66145	0.000759279	1.50615	0.00253969	NA	NA
NA	OG0000051	7	7	2	g7326	433	---NA---	---NA---	NA	NA	NA	NA	NA	no IPS match	no IPS match	no IPS match	---NA---	NA	---NA---	NA	139635	4.62256e-165	XP_005844227.1	XP_005844227.1 hypothetical protein CHLNCDRAFT_58969 [Chlorella variabilis]<>EFN52125.1 hypothetical protein CHLNCDRAFT_58969 [Chlorella variabilis]	554065	2.2e-145	16.0719	17.3623	11.7048	14.2408	14.6893	12.4319	NA	NA	NA	NA	NA	NA
NA	OG0000051	7	7	2	g886	388	---NA---	---NA---	NA	NA	NA	NA	NA	mobidb-lite (MOBIDB_LITE)	no GO terms	no GO terms	---NA---	NA	---NA---	NA	139635	0	XP_005844062.1	XP_005844062.1 hypothetical protein CHLNCDRAFT_139635 [Chlorella variabilis]<>EFN51960.1 hypothetical protein CHLNCDRAFT_139635 [Chlorella variabilis]	554065	4.9e-181	51.2874	47.3075	61.1652	60.6237	49.3004	50.8778	NA	NA	NA	NA	NA	NA
1	OG0000052	8	7	1	g4208	769	Q2MHE4	HT1_ARATH Serine/threonine/tyrosine-protein kinase HT1 OS=Arabidopsis thaliana OX=3702 GN=HT1 PE=1 SV=1	1.21362e-28	54.17	NA	NA	NA	IPR001245 (PRINTS); IPR000719 (SMART); G3DSA:3.30.200.20 (GENE3D); IPR001245 (PFAM); G3DSA:1.10.510.10 (GENE3D); mobidb-lite (MOBIDB_LITE); mobidb-lite (MOBIDB_LITE); mobidb-lite (MOBIDB_LITE); mobidb-lite (MOBIDB_LITE); PTHR44329 (PANTHER); IPR017441 (PROSITE_PATTERNS); IPR008271 (PROSITE_PATTERNS); IPR000719 (PROSITE_PROFILES); IPR011009 (SUPERFAMILY)	F:GO:0004672; F:GO:0005524; P:GO:0006468	F:protein kinase activity; F:ATP binding; P:protein phosphorylation	Q2MHE4	6.71247e-30	206533	3.21002e-47	134359	0	XP_005847290.1	XP_005847290.1 hypothetical protein CHLNCDRAFT_134359 [Chlorella variabilis]<>EFN55188.1 hypothetical protein CHLNCDRAFT_134359 [Chlorella variabilis]	554065	0	334.547	317.009	89.4369	83.9713	110.938	130.234	-1.44552	0.00202943	NA	NA	NA	NA
NA	OG0000052	8	7	1	g6198	714	Q8RWL6	STY17_ARATH Serine/threonine-protein kinase STY17 OS=Arabidopsis thaliana OX=3702 GN=STY17 PE=1 SV=1	3.86117e-31	56.61	NA	NA	NA	IPR001245 (PRINTS); IPR000719 (SMART); G3DSA:3.30.200.20 (GENE3D); IPR001245 (PFAM); G3DSA:1.10.510.10 (GENE3D); mobidb-lite (MOBIDB_LITE); mobidb-lite (MOBIDB_LITE); PTHR44329 (PANTHER); IPR017441 (PROSITE_PATTERNS); IPR008271 (PROSITE_PATTERNS); IPR000719 (PROSITE_PROFILES); IPR011009 (SUPERFAMILY)	F:GO:0004672; F:GO:0005524; P:GO:0006468	F:protein kinase activity; F:ATP binding; P:protein phosphorylation	F4I5S1	4.76218e-36	193209	2.58663e-57	140750	0	XP_005850969.1	XP_005850969.1 hypothetical protein CHLNCDRAFT_140750 [Chlorella variabilis]<>EFN58867.1 hypothetical protein CHLNCDRAFT_140750 [Chlorella variabilis]	554065	0	57.0469	16.0943	37.1553	36.4278	36.6753	28.4784	NA	NA	NA	NA	NA	NA
2	OG0000052	8	7	1	g6268	549	Q54TM7	DRKD_DICDI Probable serine/threonine-protein kinase drkD OS=Dictyostelium discoideum OX=44689 GN=drkD PE=2 SV=1	1.36897e-11	41.61	NA	NA	NA	IPR001245 (PFAM); G3DSA:1.10.510.10 (GENE3D); G3DSA:3.30.200.20 (GENE3D); mobidb-lite (MOBIDB_LITE); mobidb-lite (MOBIDB_LITE); mobidb-lite (MOBIDB_LITE); PTHR44329 (PANTHER); IPR017441 (PROSITE_PATTERNS); IPR011009 (SUPERFAMILY)	F:GO:0004672; F:GO:0005524; P:GO:0006468	F:protein kinase activity; F:ATP binding; P:protein phosphorylation	Q2MHE4	1.40338e-12	102541	1.10574e-11	29915	5.48535e-70	PRW56437.1	PRW56437.1 kinase [Chlorella sorokiniana]	3076	1.1e-45	71.8024	54.428	90.9975	76.2483	142.957	63.0359	NA	NA	1.21623	0.0375825	NA	NA
NA	OG0000052	8	7	1	g6270	1001	Q7T6Y2	YR831_MIMIV Putative serine/threonine-protein kinase/receptor R831 OS=Acanthamoeba polyphaga mimivirus OX=212035 GN=MIMI_R831 PE=3 SV=2	7.51197e-08	37.41	12	F:GO:0005525; C:GO:0005576; P:GO:0009405; C:GO:0016020; P:GO:0016032; F:GO:0017124; C:GO:0019012; C:GO:0020002; C:GO:0030430; P:GO:0030683; C:GO:0033644; C:GO:0044220	F:GTP binding; C:extracellular region; P:pathogenesis; C:membrane; P:viral process; F:SH3 domain binding; C:virion; C:host cell plasma membrane; C:host cell cytoplasm; P:evasion or tolerance by virus of host immune response; C:host cell membrane; C:host cell perinuclear region of cytoplasm	G3DSA:1.10.510.10 (GENE3D); IPR001245 (PFAM); G3DSA:1.10.510.10 (GENE3D); G3DSA:3.30.200.20 (GENE3D); mobidb-lite (MOBIDB_LITE); mobidb-lite (MOBIDB_LITE); mobidb-lite (MOBIDB_LITE); mobidb-lite (MOBIDB_LITE); mobidb-lite (MOBIDB_LITE); mobidb-lite (MOBIDB_LITE); mobidb-lite (MOBIDB_LITE); IPR000333 (PANTHER); IPR017441 (PROSITE_PATTERNS); IPR011009 (SUPERFAMILY); IPR011009 (SUPERFAMILY)	F:GO:0004672; F:GO:0004675; F:GO:0005524; P:GO:0006468; P:GO:0007178; C:GO:0016020	F:protein kinase activity; F:transmembrane receptor protein serine/threonine kinase activity; F:ATP binding; P:protein phosphorylation; P:transmembrane receptor protein serine/threonine kinase signaling pathway; C:membrane	Q2MHE4	4.4309e-06	206108	2.50687e-12	59518	8.52681e-70	XP_005842566.1	XP_005842566.1 hypothetical protein CHLNCDRAFT_59518, partial [Chlorella variabilis]<>EFN50434.1 hypothetical protein CHLNCDRAFT_59518, partial [Chlorella variabilis]	554065	1.4e-54	139.93	133.778	124.551	61.0701	71.6704	87.3521	NA	NA	NA	NA	NA	NA
NA	OG0000052	8	7	1	g6271	1463	Q2MHE4	HT1_ARATH Serine/threonine/tyrosine-protein kinase HT1 OS=Arabidopsis thaliana OX=3702 GN=HT1 PE=1 SV=1	8.29345e-29	53.67	NA	NA	NA	IPR001245 (PRINTS); IPR000719 (SMART); G3DSA:3.30.200.20 (GENE3D); G3DSA:1.10.510.10 (GENE3D); IPR001245 (PFAM); mobidb-lite (MOBIDB_LITE); mobidb-lite (MOBIDB_LITE); mobidb-lite (MOBIDB_LITE); mobidb-lite (MOBIDB_LITE); mobidb-lite (MOBIDB_LITE); mobidb-lite (MOBIDB_LITE); mobidb-lite (MOBIDB_LITE); mobidb-lite (MOBIDB_LITE); PTHR44329 (PANTHER); IPR008271 (PROSITE_PATTERNS); IPR017441 (PROSITE_…	F:GO:0004672; F:GO:0005524; P:GO:0006468	F:protein kinase activity; F:ATP binding; P:protein phosphorylation	Q2MHE4	4.58706e-30	406458	2.25739e-51	29915	2.44182e-121	PRW59307.1	PRW59307.1 kinase [Chlorella sorokiniana]	3076	3.4e-110	204.327	171.136	175.092	244.905	157.742	204.168	NA	NA	NA	NA	NA	NA
NA	OG0000052	8	7	1	g6896	472	Q8RYE9	GPPL3_ARATH Haloacid dehalogenase-like hydrolase domain-containing protein At2g33255 OS=Arabidopsis thaliana OX=3702 GN=At2g33255 PE=1 SV=1	7.54903e-25	50	NA	NA	NA	G3DSA:1.10.260.80 (GENE3D); G3DSA:3.40.50.150 (GENE3D); G3DSA:3.40.50.150 (GENE3D); IPR006439 (TIGRFAM); IPR041492 (PFAM); IPR023214 (G3DSA:3.40.50.GENE3D); IPR006439 (TIGRFAM); mobidb-lite (MOBIDB_LITE); PTHR43885:SF1 (PANTHER); PTHR43885 (PANTHER); cd02440 (CDD); IPR036412 (SUPERFAMILY); IPR029063 (SUPERFAMILY)	F:GO:0016787	F:hydrolase activity	Q8RYE9	4.17533e-26	146441	1.14846e-95	21154	5.81401e-105	PSC73846.1	PSC73846.1 ABC transporter A family member 7-like [Micractinium conductrix]	554055	1.5e-152	47.2283	48.6243	42.3175	25.1334	36.3873	34.8313	NA	NA	NA	NA	NA	NA
NA	OG0000052	8	7	1	g9680	928	Q8RWL6	STY17_ARATH Serine/threonine-protein kinase STY17 OS=Arabidopsis thaliana OX=3702 GN=STY17 PE=1 SV=1	1.35648e-27	54.55	NA	NA	NA	Coil (COILS); IPR001245 (PRINTS); IPR000719 (SMART); IPR001245 (PFAM); G3DSA:1.10.510.10 (GENE3D); G3DSA:3.30.200.20 (GENE3D); mobidb-lite (MOBIDB_LITE); mobidb-lite (MOBIDB_LITE); PTHR44329 (PANTHER); IPR008271 (PROSITE_PATTERNS); IPR017441 (PROSITE_PATTERNS); IPR000719 (PROSITE_PROFILES); IPR011009 (SUPERFAMILY)	F:GO:0004672; F:GO:0005524; P:GO:0006468	F:protein kinase activity; F:ATP binding; P:protein phosphorylation	F4I5S1	1.27726e-31	406458	1.327e-51	29775	0	PRW60788.1	PRW60788.1 exosome complex component RRP45A-like isoform X1 [Chlorella sorokiniana]	3076	7.1e-154	174.981	71.7903	109.125	110.265	92.8883	133.082	NA	NA	NA	NA	NA	NA
1	OG0000053	13	2	1	g1334	361	Q9C6T5	STGL3_ARATH Stigma-specific STIG1-like protein 3 OS=Arabidopsis thaliana OX=3702 GN=At1g50720 PE=2 SV=1	6.57739e-08	48	NA	NA	NA	no IPS match	no IPS match	no IPS match	Q9C6T5	3.63792e-09	---NA---	NA	17926	3.35193e-30	XP_005845747.1	XP_005845747.1 hypothetical protein CHLNCDRAFT_136359 [Chlorella variabilis]<>EFN53645.1 hypothetical protein CHLNCDRAFT_136359 [Chlorella variabilis]	554065	5.1e-23	1.20676	1.31681	0.0600248	0.223209	0	0.0547662	-2.52723	0.00876002	-4.84591	8.97716e-05	NA	NA
NA	OG0000053	13	2	1	g8334	459	---NA---	---NA---	NA	NA	NA	NA	NA	mobidb-lite (MOBIDB_LITE); mobidb-lite (MOBIDB_LITE); mobidb-lite (MOBIDB_LITE)	no GO terms	no GO terms	O65387	8.17891e-07	338957	1.23e-06	136359	0	XP_005845747.1	XP_005845747.1 hypothetical protein CHLNCDRAFT_136359 [Chlorella variabilis]<>EFN53645.1 hypothetical protein CHLNCDRAFT_136359 [Chlorella variabilis]	554065	8.3e-180	2.13926	0.536477	1.26052	1.42854	1.20011	0.657195	NA	NA	NA	NA	NA	NA
1	OG0000054	10	4	1	g2564	328	---NA---	---NA---	NA	NA	NA	NA	NA	mobidb-lite (MOBIDB_LITE)	no GO terms	no GO terms	---NA---	NA	---NA---	NA	58352	4.79654e-60	XP_005846097.1	XP_005846097.1 expressed protein [Chlorella variabilis]<>EFN53995.1 expressed protein [Chlorella variabilis]	554065	4.7e-52	48.4899	30.1402	12.7853	5.62487	14.2093	16.7585	-1.69902	0.00168502	NA	NA	NA	NA
NA	OG0000054	10	4	1	g2568	266	---NA---	---NA---	NA	NA	NA	NA	NA	no IPS match	no IPS match	no IPS match	---NA---	NA	---NA---	NA	58352	0	XP_005846097.1	XP_005846097.1 expressed protein [Chlorella variabilis]<>EFN53995.1 expressed protein [Chlorella variabilis]	554065	9.2e-139	14.7006	18.7767	20.7686	8.83909	18.0016	9.25549	NA	NA	NA	NA	NA	NA
NA	OG0000054	10	4	1	g5843	192	---NA---	---NA---	NA	NA	NA	NA	NA	no IPS match	no IPS match	no IPS match	---NA---	NA	---NA---	NA	58716	3.039e-27	PSC70413.1	PSC70413.1 Kelch motif containing isoform A [Micractinium conductrix]	554055	3.5e-39	0.164559	0.146312	0	0.312493	0.384034	0.328597	NA	NA	NA	NA	NA	NA
NA	OG0000054	10	4	1	g7605	329	---NA---	---NA---	NA	NA	NA	NA	NA	no IPS match	no IPS match	no IPS match	---NA---	NA	---NA---	NA	58716	0	XP_005845114.1	XP_005845114.1 hypothetical protein CHLNCDRAFT_58716 [Chlorella variabilis]<>EFN53012.1 hypothetical protein CHLNCDRAFT_58716 [Chlorella variabilis]	554065	4.9e-150	23.3125	13.4607	21.5489	7.58912	19.5378	8.37923	NA	NA	NA	NA	NA	NA
1	OG0000055	2	7	6	g190	227	---NA---	---NA---	NA	NA	NA	NA	NA	mobidb-lite (MOBIDB_LITE); mobidb-lite (MOBIDB_LITE); mobidb-lite (MOBIDB_LITE)	no GO terms	no GO terms	---NA---	NA	---NA---	NA	136640	9.99548e-148	XP_005845527.1	XP_005845527.1 expressed protein [Chlorella variabilis]<>EFN53425.1 expressed protein [Chlorella variabilis]	554065	5.1e-106	247.277	27.9943	0.480198	6.24986	0.624056	23.8233	-4.71425	0.0476267	NA	NA	NA	NA
NA	OG0000055	2	7	6	g191	245	---NA---	---NA---	NA	NA	NA	NA	NA	mobidb-lite (MOBIDB_LITE); mobidb-lite (MOBIDB_LITE); mobidb-lite (MOBIDB_LITE)	no GO terms	no GO terms	---NA---	NA	---NA---	NA	136637	2.50481e-152	XP_005845634.1	XP_005845634.1 hypothetical protein CHLNCDRAFT_136637 [Chlorella variabilis]<>EFN53532.1 hypothetical protein CHLNCDRAFT_136637 [Chlorella variabilis]	554065	4.9e-86	31.4307	23.9951	4.862	12.6783	10.5609	11.6104	NA	NA	NA	NA	NA	NA
1	OG0000055	2	7	6	g3355	270	---NA---	---NA---	NA	NA	NA	NA	NA	mobidb-lite (MOBIDB_LITE); mobidb-lite (MOBIDB_LITE)	no GO terms	no GO terms	---NA---	NA	---NA---	NA	136640	5.04072e-29	PRW57457.1	PRW57457.1 hypothetical protein C2E21_4080 [Chlorella sorokiniana]	3076	2.5e-30	473.49	14.0459	0	0.223209	0.144013	0.383363	-10.3608	8.62135e-05	-9.33316	0.000272154	NA	NA
NA	OG0000055	2	7	6	g3406	227	---NA---	---NA---	NA	NA	NA	NA	NA	mobidb-lite (MOBIDB_LITE); mobidb-lite (MOBIDB_LITE); mobidb-lite (MOBIDB_LITE)	no GO terms	no GO terms	---NA---	NA	---NA---	NA	136640	1.76529e-149	XP_005845527.1	XP_005845527.1 expressed protein [Chlorella variabilis]<>EFN53425.1 expressed protein [Chlorella variabilis]	554065	2.1e-107	2.46838	0.438935	0	0.133926	0	0.0547662	NA	NA	NA	NA	NA	NA
NA	OG0000055	2	7	6	g5401	555	---NA---	---NA---	NA	NA	NA	NA	NA	Coil (COILS); mobidb-lite (MOBIDB_LITE); mobidb-lite (MOBIDB_LITE); mobidb-lite (MOBIDB_LITE)	no GO terms	no GO terms	---NA---	NA	---NA---	NA	136637	2.10287e-07	PSC72527.1	PSC72527.1 hypothetical protein C2E20_4309 [Micractinium conductrix]	554055	1.2e-26	7.45999	6.53526	5.16213	12.4104	1.53614	8.81736	NA	NA	NA	NA	NA	NA
NA	OG0000055	2	7	6	g8383	227	---NA---	---NA---	NA	NA	NA	NA	NA	mobidb-lite (MOBIDB_LITE); mobidb-lite (MOBIDB_LITE); mobidb-lite (MOBIDB_LITE)	no GO terms	no GO terms	---NA---	NA	---NA---	NA	136640	7.32671e-152	XP_005845527.1	XP_005845527.1 expressed protein [Chlorella variabilis]<>EFN53425.1 expressed protein [Chlorella variabilis]	554065	5e-109	147.006	26.7263	0.0600248	4.55347	0.0960086	6.90054	NA	NA	NA	NA	NA	NA
NA	OG0000055	2	7	6	g8385	236	---NA---	---NA---	NA	NA	NA	NA	NA	no IPS match	no IPS match	no IPS match	---NA---	NA	---NA---	NA	136640	1.80628e-45	XP_005845527.1	XP_005845527.1 expressed protein [Chlorella variabilis]<>EFN53425.1 expressed protein [Chlorella variabilis]	554065	8.1e-38	2.57808	2.24345	0.660272	2.41066	1.68015	1.09532	NA	NA	NA	NA	NA	NA
3	OG0000056	6	5	4	g1244	592	Q65XS5	BC10_ORYSJ Glycosyltransferase BC10 OS=Oryza sativa subsp. japonica OX=39947 GN=BC10 PE=1 SV=1	2.40354e-25	49.6	NA	NA	NA	Coil (COILS); IPR003406 (PFAM); PTHR31042 (PANTHER)	F:GO:0008375; C:GO:0016020	F:acetylglucosaminyltransferase activity; C:membrane	Q6DST3	1.63556e-40	---NA---	NA	142202	0	XP_005850360.1	XP_005850360.1 hypothetical protein CHLNCDRAFT_142202 [Chlorella variabilis]<>EFN58258.1 hypothetical protein CHLNCDRAFT_142202 [Chlorella variabilis]	554065	1.1e-301	49.4773	36.5292	213.268	412	198.018	216.546	3.39419	4.05799e-08	2.765	7.66903e-06	NA	NA
NA	OG0000056	6	5	4	g73	516	Q65XS5	BC10_ORYSJ Glycosyltransferase BC10 OS=Oryza sativa subsp. japonica OX=39947 GN=BC10 PE=1 SV=1	2.0232e-25	52.92	NA	NA	NA	IPR003406 (PFAM); mobidb-lite (MOBIDB_LITE); mobidb-lite (MOBIDB_LITE); PTHR31042 (PANTHER)	F:GO:0008375; C:GO:0016020	F:acetylglucosaminyltransferase activity; C:membrane	B6IDH4	7.87729e-30	---NA---	NA	141408	0	XP_005843162.1	XP_005843162.1 hypothetical protein CHLNCDRAFT_141408 [Chlorella variabilis]<>EFN51060.1 hypothetical protein CHLNCDRAFT_141408 [Chlorella variabilis]	554065	1.4e-271	33.0763	39.5042	29.5322	18.6603	42.3878	26.4521	NA	NA	NA	NA	NA	NA
NA	OG0000056	6	5	4	g75	416	Q65XS5	BC10_ORYSJ Glycosyltransferase BC10 OS=Oryza sativa subsp. japonica OX=39947 GN=BC10 PE=1 SV=1	8.0836e-09	45.8	NA	NA	NA	IPR003406 (PFAM); mobidb-lite (MOBIDB_LITE); PTHR31042 (PANTHER)	F:GO:0008375; C:GO:0016020	F:acetylglucosaminyltransferase activity; C:membrane	Q4V3A2	2.54822e-15	---NA---	NA	55340	0	XP_005843195.1	XP_005843195.1 hypothetical protein CHLNCDRAFT_55340 [Chlorella variabilis]<>EFN51093.1 hypothetical protein CHLNCDRAFT_55340 [Chlorella variabilis]	554065	1.6e-174	0.164559	0.292624	0.12005	0.178567	0.0480043	0.109532	NA	NA	NA	NA	NA	NA
NA	OG0000056	6	5	4	g9474	671	Q65XS5	BC10_ORYSJ Glycosyltransferase BC10 OS=Oryza sativa subsp. japonica OX=39947 GN=BC10 PE=1 SV=1	2.39352e-22	50.21	NA	NA	NA	IPR003406 (PFAM); mobidb-lite (MOBIDB_LITE); mobidb-lite (MOBIDB_LITE); mobidb-lite (MOBIDB_LITE); PTHR31042 (PANTHER)	F:GO:0008375; C:GO:0016020	F:acetylglucosaminyltransferase activity; C:membrane	Q6DST3	4.11058e-32	---NA---	NA	54159	0	XP_005844847.1	XP_005844847.1 hypothetical protein CHLNCDRAFT_54159 [Chlorella variabilis]<>EFN52745.1 hypothetical protein CHLNCDRAFT_54159 [Chlorella variabilis]	554065	0	20.3504	32.7251	30.4325	14.8211	15.7454	18.3467	NA	NA	NA	NA	NA	NA
3	OG0000056	6	5	4	g9986	515	Q65XS5	BC10_ORYSJ Glycosyltransferase BC10 OS=Oryza sativa subsp. japonica OX=39947 GN=BC10 PE=1 SV=1	8.42279e-16	46.25	NA	NA	NA	IPR003406 (PFAM); mobidb-lite (MOBIDB_LITE); PTHR31042 (PANTHER)	F:GO:0008375; C:GO:0016020	F:acetylglucosaminyltransferase activity; C:membrane	Q9LYF7	7.06077e-24	---NA---	NA	55044	0	XP_005843688.1	XP_005843688.1 hypothetical protein CHLNCDRAFT_55044 [Chlorella variabilis]<>EFN51586.1 hypothetical protein CHLNCDRAFT_55044 [Chlorella variabilis]	554065	1.5e-254	2.41352	4.58444	226.053	216.201	104.121	129.029	6.43722	7.12898e-28	5.54027	2.90405e-22	NA	NA
3	OG0000057	4	6	5	g1192	330	---NA---	---NA---	NA	NA	NA	NA	NA	no IPS match	no IPS match	no IPS match	---NA---	NA	---NA---	NA	142251	0	XP_005850380.1	XP_005850380.1 hypothetical protein CHLNCDRAFT_142251 [Chlorella variabilis]<>EFN58278.1 hypothetical protein CHLNCDRAFT_142251 [Chlorella variabilis]	554065	6.2e-169	0.164559	0.0975412	4.80198	1.29461	1.24811	1.20486	4.82485	5.36265e-07	3.65914	0.000242101	NA	NA
NA	OG0000057	4	6	5	g2028	896	---NA---	---NA---	NA	NA	NA	NA	NA	IPR006342 (PFAM); IPR006342 (TIGRFAM); mobidb-lite (MOBIDB_LITE); PTHR34203 (PANTHER); PTHR34203:SF9 (PANTHER); IPR029063 (SUPERFAMILY)	no GO terms	no GO terms	---NA---	NA	291633	6.51807e-23	144230	0	XP_005848864.1	XP_005848864.1 hypothetical protein CHLNCDRAFT_144230 [Chlorella variabilis]<>EFN56762.1 hypothetical protein CHLNCDRAFT_144230 [Chlorella variabilis]	554065	0	54.6883	48.8194	31.6931	16.1157	19.2977	33.0788	NA	NA	NA	NA	NA	NA
NA	OG0000057	4	6	5	g2049	791	---NA---	---NA---	NA	NA	NA	NA	NA	IPR006342 (PFAM); IPR006342 (TIGRFAM); mobidb-lite (MOBIDB_LITE); PTHR34203 (PANTHER); PTHR34203:SF9 (PANTHER); IPR029063 (SUPERFAMILY)	no GO terms	no GO terms	---NA---	NA	291633	3.36256e-25	144252	0	XP_005848864.1	XP_005848864.1 hypothetical protein CHLNCDRAFT_144230 [Chlorella variabilis]<>EFN56762.1 hypothetical protein CHLNCDRAFT_144230 [Chlorella variabilis]	554065	1.7e-209	54.8528	48.9657	81.6337	34.285	31.4908	36.3648	NA	NA	NA	NA	NA	NA
NA	OG0000057	4	6	5	g2050	476	---NA---	---NA---	NA	NA	NA	NA	NA	no IPS match	no IPS match	no IPS match	---NA---	NA	---NA---	NA	144253	0	XP_005848676.1	XP_005848676.1 hypothetical protein CHLNCDRAFT_144253 [Chlorella variabilis]<>EFN56574.1 hypothetical protein CHLNCDRAFT_144253 [Chlorella variabilis]	554065	3.9e-196	23.0382	33.4079	17.4072	38.5706	17.5216	21.5779	NA	NA	NA	NA	NA	NA
3	OG0000057	4	6	5	g5159	467	---NA---	---NA---	NA	NA	NA	NA	NA	IPR026057 (PFAM); mobidb-lite (MOBIDB_LITE); mobidb-lite (MOBIDB_LITE)	no GO terms	no GO terms	---NA---	NA	---NA---	NA	137815	0	XP_005851175.1	XP_005851175.1 hypothetical protein CHLNCDRAFT_137815 [Chlorella variabilis]<>EFN59073.1 hypothetical protein CHLNCDRAFT_137815 [Chlorella variabilis]	554065	7.2e-272	23.8061	28.5308	39.0161	65.7575	29.3306	53.2875	1.51874	0.0106022	NA	NA	NA	NA
3	OG0000057	4	6	5	g8601	474	---NA---	---NA---	NA	NA	NA	NA	NA	mobidb-lite (MOBIDB_LITE)	no GO terms	no GO terms	---NA---	NA	---NA---	NA	51779	0	XP_005848441.1	XP_005848441.1 hypothetical protein CHLNCDRAFT_51779 [Chlorella variabilis]<>EFN56339.1 hypothetical protein CHLNCDRAFT_51779 [Chlorella variabilis]	554065	8.9e-286	2.79749	1.51189	8.52351	5.49095	5.47249	4.43606	2.13162	0.000567385	1.70443	0.00686801	NA	NA
1	OG0000058	4	3	8	g2008	915	---NA---	---NA---	NA	NA	NA	NA	NA	Coil (COILS); Coil (COILS); Coil (COILS); IPR000061 (SMART); IPR019147 (SMART); IPR035967 (G3DSA:1.10.10.GENE3D); IPR019147 (PFAM); IPR000061 (PFAM); mobidb-lite (MOBIDB_LITE); mobidb-lite (MOBIDB_LITE); mobidb-lite (MOBIDB_LITE); mobidb-lite (MOBIDB_LITE); mobidb-lite (MOBIDB_LITE); mobidb-lite (MOBIDB_LITE); mobidb-lite (MOBIDB_LITE); mobidb-lite (MOBIDB_LITE); mobidb-lite (MOBIDB_LITE); mobidb…	F:GO:0003723; P:GO:0006396	F:RNA binding; P:RNA processing	Q94BN8	1.1399e-15	394023	2.92743e-16	57484	0	XP_005848655.1	XP_005848655.1 hypothetical protein CHLNCDRAFT_57484 [Chlorella variabilis]<>EFN56553.1 hypothetical protein CHLNCDRAFT_57484 [Chlorella variabilis]	554065	8.4e-224	137.516	137.923	64.6467	55.9809	37.5394	57.1212	NA	NA	-1.05194	0.0270366	NA	NA
NA	OG0000058	4	3	8	g2010	434	---NA---	---NA---	NA	NA	NA	NA	NA	IPR006685 (PFAM); mobidb-lite (MOBIDB_LITE); PTHR30566 (PANTHER); IPR010920 (SUPERFAMILY); IPR011014 (SUPERFAMILY)	C:GO:0016020; P:GO:0055085	C:membrane; P:transmembrane transport	Q56X46	9.1624e-06	144381	1.22077e-15	57485	0	XP_005848656.1	XP_005848656.1 expressed protein [Chlorella variabilis]<>EFN56554.1 expressed protein [Chlorella variabilis]	554065	4.2e-189	11.3545	15.9968	12.9653	8.39267	12.6731	12.4867	NA	NA	NA	NA	NA	NA
NA	OG0000058	4	3	8	g5878	402	O28726	Y1546_ARCFU Uncharacterized MscS family protein AF_1546 OS=Archaeoglobus fulgidus (strain ATCC 49558 / VC-16 / DSM 4304 / JCM 9628 / NBRC 100126) OX=224325 GN=AF_1546 PE=3 SV=1	7.2618e-08	55.75	NA	NA	NA	IPR006685 (PFAM); mobidb-lite (MOBIDB_LITE); PTHR30221 (PANTHER); IPR011014 (SUPERFAMILY); IPR010920 (SUPERFAMILY)	C:GO:0016020; P:GO:0055085	C:membrane; P:transmembrane transport	Q8L7W1	1.2545e-06	144381	2.05342e-17	144115	0	XP_005848613.1	XP_005848613.1 hypothetical protein CHLNCDRAFT_144115 [Chlorella variabilis]<>EFN56511.1 hypothetical protein CHLNCDRAFT_144115 [Chlorella variabilis]	554065	4e-162	35.8189	26.7263	25.9907	13.5711	19.6818	13.9654	NA	NA	NA	NA	NA	NA
1	OG0000059	4	5	6	g10721	906	Q941F1	PLA15_ARATH Phospholipase A1-Igamma1, chloroplastic OS=Arabidopsis thaliana OX=3702 GN=At1g06800 PE=1 SV=2	5.67849e-14	48.39	NA	NA	NA	Coil (COILS); IPR002921 (PFAM); IPR029058 (G3DSA:3.40.50.GENE3D); mobidb-lite (MOBIDB_LITE); mobidb-lite (MOBIDB_LITE); mobidb-lite (MOBIDB_LITE); mobidb-lite (MOBIDB_LITE); PTHR45856 (PANTHER); cd00519 (CDD); IPR029058 (SUPERFAMILY)	P:GO:0006629	P:lipid metabolic process	Q9C8G6	5.21303e-17	142444	5.55704e-23	133178	0	XP_005852111.1	XP_005852111.1 expressed protein [Chlorella variabilis]<>EFN60009.1 expressed protein [Chlorella variabilis]	554065	7.1e-175	65.2749	66.767	21.789	11.473	10.705	24.2067	-1.58071	0.00474795	-1.43642	0.0110508	NA	NA
NA	OG0000059	4	5	6	g2719	919	P0CT91	LIPA_ACRAM Lipase A OS=Acremonium alcalophilum OX=398408 GN=lipA PE=1 SV=1	7.76402e-15	46.23	NA	NA	NA	IPR002921 (PFAM); IPR029058 (G3DSA:3.40.50.GENE3D); mobidb-lite (MOBIDB_LITE); mobidb-lite (MOBIDB_LITE); PTHR45856 (PANTHER); cd00519 (CDD); IPR029058 (SUPERFAMILY)	P:GO:0006629	P:lipid metabolic process	A0A1P8BAJ1	7.47551e-16	142444	1.66967e-41	140859	0	XP_005851014.1	XP_005851014.1 hypothetical protein CHLNCDRAFT_140859 [Chlorella variabilis]<>EFN58912.1 hypothetical protein CHLNCDRAFT_140859 [Chlorella variabilis]	554065	0	80.0851	72.6194	61.2853	35.0885	53.1408	53.9995	NA	NA	NA	NA	NA	NA
1	OG0000059	4	5	6	g2720	635	P61872	LIP_RHIOR Lipase OS=Rhizopus oryzae OX=64495 PE=1 SV=1	2.08316e-10	50.91	NA	NA	NA	IPR029058 (G3DSA:3.40.50.GENE3D); IPR002921 (PFAM); mobidb-lite (MOBIDB_LITE); PTHR45856 (PANTHER); PTHR45856:SF11 (PANTHER); cd00519 (CDD); IPR029058 (SUPERFAMILY)	P:GO:0006629	P:lipid metabolic process	A0A1P8BAJ1	4.19371e-13	142444	1.00169e-34	140860	0	XP_005851015.1	XP_005851015.1 hypothetical protein CHLNCDRAFT_140860 [Chlorella variabilis]<>EFN58913.1 hypothetical protein CHLNCDRAFT_140860 [Chlorella variabilis]	554065	0	81.0176	95.2978	40.9369	23.9727	29.1866	31.162	-1.02448	0.0256502	-1.05306	0.0223511	NA	NA
NA	OG0000059	4	5	6	g9249	878	Q941F1	PLA15_ARATH Phospholipase A1-Igamma1, chloroplastic OS=Arabidopsis thaliana OX=3702 GN=At1g06800 PE=1 SV=2	3.54713e-11	47.09	NA	NA	NA	IPR002921 (PFAM); IPR029058 (G3DSA:3.40.50.GENE3D); mobidb-lite (MOBIDB_LITE); mobidb-lite (MOBIDB_LITE); mobidb-lite (MOBIDB_LITE); PTHR45856 (PANTHER); cd00519 (CDD); IPR029058 (SUPERFAMILY)	P:GO:0006629	P:lipid metabolic process	A0A1P8BAJ1	1.13853e-17	142444	1.95908e-23	133178	0	XP_005852111.1	XP_005852111.1 expressed protein [Chlorella variabilis]<>EFN60009.1 expressed protein [Chlorella variabilis]	554065	0	46.7346	39.748	37.5155	33.5707	25.6823	34.2289	NA	NA	NA	NA	NA	NA
1	OG0000059	4	5	6	g9500	1151	Q8S1D9	EG1_ORYSJ Phospholipase A1 EG1, chloroplastic/mitochondrial OS=Oryza sativa subsp. japonica OX=39947 GN=EG1 PE=1 SV=1	2.68975e-15	49.73	NA	NA	NA	IPR002921 (PFAM); IPR029058 (G3DSA:3.40.50.GENE3D); mobidb-lite (MOBIDB_LITE); mobidb-lite (MOBIDB_LITE); mobidb-lite (MOBIDB_LITE); mobidb-lite (MOBIDB_LITE); mobidb-lite (MOBIDB_LITE); mobidb-lite (MOBIDB_LITE); PTHR45856:SF11 (PANTHER); PTHR45856 (PANTHER); cd00519 (CDD); IPR029058 (SUPERFAMILY)	P:GO:0006629	P:lipid metabolic process	A0A1P8BAJ1	9.58238e-17	142444	3.96349e-26	138296	0	XP_005844946.1	XP_005844946.1 hypothetical protein CHLNCDRAFT_138296 [Chlorella variabilis]<>EFN52844.1 hypothetical protein CHLNCDRAFT_138296 [Chlorella variabilis]	554065	0	98.5705	86.1289	36.255	27.053	23.7621	43.5939	-1.10238	0.0268951	NA	NA	NA	NA
NA	OG0000060	0	14	1	g1020	168	---NA---	---NA---	NA	NA	NA	NA	NA	IPR040521 (PFAM)	no GO terms	no GO terms	---NA---	NA	403851	5.93457e-10	59399	2.32501e-69	XP_005843004.1	XP_005843004.1 hypothetical protein CHLNCDRAFT_59399 [Chlorella variabilis]<>EFN50902.1 hypothetical protein CHLNCDRAFT_59399 [Chlorella variabilis]	554065	1.2e-51	56.0596	61.7924	49.6405	38.392	50.0685	50.1111	NA	NA	NA	NA	NA	NA
NA	OG0000060	0	14	1	g1025	190	Q8VHI5	VITRN_MOUSE Vitrin OS=Mus musculus OX=10090 GN=Vit PE=1 SV=2	8.55419e-10	53.93	4	F:GO:0003677; C:GO:0005634; P:GO:0006355; F:GO:0043565	F:DNA binding; C:nucleus; P:regulation of transcription, DNA-templated; F:sequence-specific DNA binding	IPR004043 (SMART); IPR004043 (PFAM); IPR036609 (G3DSA:2.170.130.GENE3D); PTHR24020 (PANTHER); IPR030743 (PTHR24020:PANTHER); PS51257 (PROSITE_PROFILES); IPR004043 (PROSITE_PROFILES); IPR036609 (SUPERFAMILY)	P:GO:0042742; P:GO:0045089; C:GO:0062023	P:defense response to bacterium; P:positive regulation of innate immune response; C:collagen-containing extracellular matrix	---NA---	NA	---NA---	NA	142422	3.59034e-78	XP_005850201.1	XP_005850201.1 hypothetical protein CHLNCDRAFT_142422 [Chlorella variabilis]<>EFN58099.1 hypothetical protein CHLNCDRAFT_142422 [Chlorella variabilis]	554065	1.8e-56	11.3545	9.36396	13.0854	12.2765	7.72869	13.0891	NA	NA	NA	NA	NA	NA
NA	OG0000060	0	14	1	g10996	190	Q8N8Z6	DCBD1_HUMAN Discoidin, CUB and LCCL domain-containing protein 1 OS=Homo sapiens OX=9606 GN=DCBLD1 PE=1 SV=2	8.52809e-06	51.95	NA	NA	NA	IPR004043 (SMART); IPR004043 (PFAM); IPR036609 (G3DSA:2.170.130.GENE3D); PTHR24020 (PANTHER); IPR030743 (PTHR24020:PANTHER); IPR004043 (PROSITE_PROFILES); IPR036609 (SUPERFAMILY); IPR036609 (SUPERFAMILY)	P:GO:0042742; P:GO:0045089; C:GO:0062023	P:defense response to bacterium; P:positive regulation of innate immune response; C:collagen-containing extracellular matrix	---NA---	NA	---NA---	NA	142422	1.63914e-127	XP_005850201.1	XP_005850201.1 hypothetical protein CHLNCDRAFT_142422 [Chlorella variabilis]<>EFN58099.1 hypothetical protein CHLNCDRAFT_142422 [Chlorella variabilis]	554065	5.8e-95	13.1098	11.8513	12.8453	9.95514	10.2249	12.7605	NA	NA	NA	NA	NA	NA
NA	OG0000060	0	14	1	g1777	349	Q9H0B8	CRLD2_HUMAN Cysteine-rich secretory protein LCCL domain-containing 2 OS=Homo sapiens OX=9606 GN=CRISPLD2 PE=2 SV=1	5.84282e-15	47.16	NA	NA	NA	IPR004043 (SMART); IPR004043 (PFAM); IPR036609 (G3DSA:2.170.130.GENE3D); mobidb-lite (MOBIDB_LITE); mobidb-lite (MOBIDB_LITE); mobidb-lite (MOBIDB_LITE); IPR030743 (PTHR24020:PANTHER); PTHR24020 (PANTHER); PTHR24020 (PANTHER); IPR030743 (PTHR24020:PANTHER); PTHR24020 (PANTHER); IPR004043 (PROSITE_PROFILES); IPR004043 (PROSITE_PROFILES); IPR004043 (PROSITE_PROFILES); IPR036609 (SUPERFAMILY); IPR03…	P:GO:0042742; P:GO:0045089; C:GO:0062023	P:defense response to bacterium; P:positive regulation of innate immune response; C:collagen-containing extracellular matrix	---NA---	NA	---NA---	NA	135134	0	XP_005846718.1	XP_005846718.1 hypothetical protein CHLNCDRAFT_135134 [Chlorella variabilis]<>EFN54616.1 hypothetical protein CHLNCDRAFT_135134 [Chlorella variabilis]	554065	3.6e-151	0.0548528	0.0487706	0	0	0	0	NA	NA	NA	NA	NA	NA
NA	OG0000060	0	14	1	g1859	180	---NA---	---NA---	NA	NA	NA	NA	NA	Coil (COILS); IPR040521 (PFAM)	no GO terms	no GO terms	---NA---	NA	403851	8.32017e-10	59399	6.67498e-70	XP_005843004.1	XP_005843004.1 hypothetical protein CHLNCDRAFT_59399 [Chlorella variabilis]<>EFN50902.1 hypothetical protein CHLNCDRAFT_59399 [Chlorella variabilis]	554065	1.1e-55	32.6923	28.9697	30.0124	19.1514	29.2826	23.4947	NA	NA	NA	NA	NA	NA
2	OG0000060	0	14	1	g2509	140	---NA---	---NA---	NA	NA	NA	NA	NA	IPR040521 (PFAM)	no GO terms	no GO terms	---NA---	NA	403851	2.71707e-10	59399	1.68287e-51	XP_005843004.1	XP_005843004.1 hypothetical protein CHLNCDRAFT_59399 [Chlorella variabilis]<>EFN50902.1 hypothetical protein CHLNCDRAFT_59399 [Chlorella variabilis]	554065	1.4e-37	4.7722	7.31559	12.005	12.9015	11.8571	14.1297	1.51495	0.00582175	1.59183	0.00390745	NA	NA
NA	OG0000060	0	14	1	g3779	96	---NA---	---NA---	NA	NA	NA	NA	NA	no IPS match	no IPS match	no IPS match	---NA---	NA	---NA---	NA	59501	3.15091e-18	XP_005842650.1	XP_005842650.1 expressed protein [Chlorella variabilis]<>EFN50518.1 expressed protein [Chlorella variabilis]	554065	3.8e-10	4.82705	6.04755	7.32302	5.89273	6.33657	5.69569	NA	NA	NA	NA	NA	NA
NA	OG0000060	0	14	1	g4519	81	---NA---	---NA---	NA	NA	NA	NA	NA	no IPS match	no IPS match	no IPS match	---NA---	NA	---NA---	NA	58465	3.44943e-35	XP_005845426.1	XP_005845426.1 hypothetical protein CHLNCDRAFT_58610 [Chlorella variabilis]<>EFN53324.1 hypothetical protein CHLNCDRAFT_58610 [Chlorella variabilis]	554065	6.7e-08	6.80175	7.75453	5.94245	4.01777	3.60032	4.10747	NA	NA	NA	NA	NA	NA
2	OG0000060	0	14	1	g570	144	---NA---	---NA---	NA	NA	NA	NA	NA	IPR040521 (PFAM)	no GO terms	no GO terms	---NA---	NA	403851	3.78818e-10	59399	6.39724e-53	XP_005843004.1	XP_005843004.1 hypothetical protein CHLNCDRAFT_59399 [Chlorella variabilis]<>EFN50902.1 hypothetical protein CHLNCDRAFT_59399 [Chlorella variabilis]	554065	5.9e-39	0.877645	0.78033	1.86077	0.892837	1.53614	2.35495	NA	NA	1.71001	0.0191282	NA	NA
NA	OG0000060	0	14	1	g653	144	---NA---	---NA---	NA	NA	NA	NA	NA	IPR040521 (PFAM)	no GO terms	no GO terms	---NA---	NA	403851	3.78818e-10	59399	6.39724e-53	XP_005843004.1	XP_005843004.1 hypothetical protein CHLNCDRAFT_59399 [Chlorella variabilis]<>EFN50902.1 hypothetical protein CHLNCDRAFT_59399 [Chlorella variabilis]	554065	5.9e-39	6.41778	7.36436	7.32302	5.62487	8.83279	9.58409	NA	NA	NA	NA	NA	NA
NA	OG0000060	0	14	1	g6675	103	---NA---	---NA---	NA	NA	NA	NA	NA	IPR004043 (PFAM); IPR036609 (G3DSA:2.170.130.GENE3D); IPR004043 (PROSITE_PROFILES); IPR036609 (SUPERFAMILY)	no GO terms	no GO terms	---NA---	NA	---NA---	NA	142422	2.32621e-30	XP_005850201.1	XP_005850201.1 hypothetical protein CHLNCDRAFT_142422 [Chlorella variabilis]<>EFN58099.1 hypothetical protein CHLNCDRAFT_142422 [Chlorella variabilis]	554065	1.1e-20	28.9623	29.2136	34.4542	16.6961	20.0658	15.4441	NA	NA	NA	NA	NA	NA
NA	OG0000060	0	14	1	g818	332	---NA---	---NA---	NA	NA	NA	NA	NA	PR01217 (PRINTS); IPR004043 (SMART); IPR036609 (G3DSA:2.170.130.GENE3D); IPR004043 (PFAM); mobidb-lite (MOBIDB_LITE); mobidb-lite (MOBIDB_LITE); mobidb-lite (MOBIDB_LITE); mobidb-lite (MOBIDB_LITE); PTHR24020 (PANTHER); IPR030743 (PTHR24020:PANTHER); IPR004043 (PROSITE_PROFILES); IPR004043 (PROSITE_PROFILES); IPR036609 (SUPERFAMILY); IPR036609 (SUPERFAMILY)	P:GO:0042742; P:GO:0045089; C:GO:0062023	P:defense response to bacterium; P:positive regulation of innate immune response; C:collagen-containing extracellular matrix	---NA---	NA	---NA---	NA	139567	0	XP_005844023.1	XP_005844023.1 hypothetical protein CHLNCDRAFT_139567 [Chlorella variabilis]<>EFN51921.1 hypothetical protein CHLNCDRAFT_139567 [Chlorella variabilis]	554065	3.5e-111	4.38823	5.65739	0.960396	1.42854	0.720065	2.24541	NA	NA	NA	NA	NA	NA
NA	OG0000060	0	14	1	g8563	144	---NA---	---NA---	NA	NA	NA	NA	NA	IPR040521 (PFAM)	no GO terms	no GO terms	---NA---	NA	403851	2.53314e-10	59399	1.85568e-52	XP_005843004.1	XP_005843004.1 hypothetical protein CHLNCDRAFT_59399 [Chlorella variabilis]<>EFN50902.1 hypothetical protein CHLNCDRAFT_59399 [Chlorella variabilis]	554065	1.3e-38	6.36293	8.33977	9.18379	8.12482	5.76052	5.80522	NA	NA	NA	NA	NA	NA
NA	OG0000060	0	14	1	g945	78	---NA---	---NA---	NA	NA	NA	NA	NA	no IPS match	no IPS match	no IPS match	---NA---	NA	---NA---	NA	58465	3.62762e-42	XP_005845426.1	XP_005845426.1 hypothetical protein CHLNCDRAFT_58610 [Chlorella variabilis]<>EFN53324.1 hypothetical protein CHLNCDRAFT_58610 [Chlorella variabilis]	554065	5.3e-10	4.38823	4.9746	3.78156	3.52671	3.07228	5.53139	NA	NA	NA	NA	NA	NA
1	OG0000061	7	4	3	g11135	558	Q39525	HUP3_PARKE H(+)/hexose cotransporter 3 OS=Parachlorella kessleri OX=3074 GN=HUP3 PE=2 SV=1	2.86154e-152	65.91	NA	NA	NA	IPR003663 (PRINTS); IPR005828 (PFAM); IPR003663 (TIGRFAM); G3DSA:1.20.1250.20 (GENE3D); mobidb-lite (MOBIDB_LITE); PTHR23500 (PANTHER); PTHR23500:SF477 (PANTHER); IPR005829 (PROSITE_PATTERNS); IPR005829 (PROSITE_PATTERNS); IPR020846 (PROSITE_PROFILES); IPR020846 (CDD); IPR036259 (SUPERFAMILY)	F:GO:0005215; C:GO:0016020; C:GO:0016021; F:GO:0022857; P:GO:0055085	F:transporter activity; C:membrane; C:integral component of membrane; F:transmembrane transporter activity; P:transmembrane transport	Q9SX48	5.94823e-150	196325	1.18208e-24	23239	0	XP_005847722.1	XP_005847722.1 hypothetical protein CHLNCDRAFT_23239 [Chlorella variabilis]<>EFN55620.1 hypothetical protein CHLNCDRAFT_23239 [Chlorella variabilis]	554065	1.7e-299	1020.48	564.861	36.1949	64.4629	20.8819	36.2552	-3.44997	2.73648e-07	-4.3036	4.56636e-10	NA	NA
1	OG0000061	7	4	3	g8029	562	Q39524	HUP2_PARKE H(+)/hexose cotransporter 2 OS=Parachlorella kessleri OX=3074 GN=HUP2 PE=2 SV=1	3.94416e-169	68.57	NA	NA	NA	IPR003663 (PRINTS); IPR005828 (PFAM); IPR003663 (TIGRFAM); G3DSA:1.20.1250.20 (GENE3D); PTHR23500 (PANTHER); PTHR23500:SF464 (PANTHER); IPR005829 (PROSITE_PATTERNS); IPR005829 (PROSITE_PATTERNS); IPR020846 (PROSITE_PROFILES); IPR020846 (CDD); IPR036259 (SUPERFAMILY)	F:GO:0005215; C:GO:0016020; C:GO:0016021; F:GO:0022857; P:GO:0055085	F:transporter activity; C:membrane; C:integral component of membrane; F:transmembrane transporter activity; P:transmembrane transport	Q94AZ2	2.05435e-156	196325	1.26704e-31	33950	0	XP_005851635.1	XP_005851635.1 hypothetical protein CHLNCDRAFT_33950 [Chlorella variabilis]<>EFN59533.1 hypothetical protein CHLNCDRAFT_33950 [Chlorella variabilis]	554065	0	92.9756	87.1043	28.8719	18.8389	32.931	38.8292	-1.48726	0.000669451	NA	NA	NA	NA
NA	OG0000061	7	4	3	g8267	688	Q39524	HUP2_PARKE H(+)/hexose cotransporter 2 OS=Parachlorella kessleri OX=3074 GN=HUP2 PE=2 SV=1	0	72.2	NA	NA	NA	IPR003663 (PRINTS); IPR003663 (TIGRFAM); G3DSA:1.20.1250.20 (GENE3D); IPR005828 (PFAM); mobidb-lite (MOBIDB_LITE); PTHR23500 (PANTHER); PTHR23500:SF477 (PANTHER); IPR005829 (PROSITE_PATTERNS); IPR020846 (PROSITE_PROFILES); IPR020846 (CDD); IPR036259 (SUPERFAMILY)	F:GO:0005215; C:GO:0016020; C:GO:0016021; F:GO:0022857; P:GO:0055085	F:transporter activity; C:membrane; C:integral component of membrane; F:transmembrane transporter activity; P:transmembrane transport	Q9LT15	0	196325	5.34796e-26	59832	0	XP_005842790.1	XP_005842790.1 hypothetical protein CHLNCDRAFT_59832 [Chlorella variabilis]<>XP_005845768.1 hypothetical protein CHLNCDRAFT_59732 [Chlorella variabilis]<>EFN50678.1 hypothetical protein CHLNCDRAFT_59832 [Chlorella variabilis]<>EFN53666.1 hypothetical protein CHLNCDRAFT_59732 [Chlorella variabilis]	554065	3.2e-308	20.7892	19.8496	13.2054	3.88384	4.12837	7.9411	NA	NA	NA	NA	NA	NA
NA	OG0000061	7	4	3	g8275	550	Q39524	HUP2_PARKE H(+)/hexose cotransporter 2 OS=Parachlorella kessleri OX=3074 GN=HUP2 PE=2 SV=1	0	75.92	NA	NA	NA	IPR003663 (PRINTS); IPR005828 (PFAM); IPR003663 (TIGRFAM); G3DSA:1.20.1250.20 (GENE3D); mobidb-lite (MOBIDB_LITE); PTHR23500:SF515 (PANTHER); PTHR23500 (PANTHER); IPR005829 (PROSITE_PATTERNS); IPR005829 (PROSITE_PATTERNS); IPR020846 (PROSITE_PROFILES); IPR020846 (CDD); IPR036259 (SUPERFAMILY)	F:GO:0005215; C:GO:0016020; C:GO:0016021; F:GO:0022857; P:GO:0055085	F:transporter activity; C:membrane; C:integral component of membrane; F:transmembrane transporter activity; P:transmembrane transport	Q94AZ2	0	196325	4.57226e-31	136418	0	XP_005845876.1	XP_005845876.1 hypothetical protein CHLNCDRAFT_136418 [Chlorella variabilis]<>EFN53774.1 hypothetical protein CHLNCDRAFT_136418 [Chlorella variabilis]	554065	0	2.63294	3.12132	1.74072	3.70527	6.96063	3.34074	NA	NA	NA	NA	NA	NA
NA	OG0000062	6	5	3	g1371	403	Q9XEA8	CYSK2_ORYSJ Cysteine synthase OS=Oryza sativa subsp. japonica OX=39947 GN=RCS3 PE=2 SV=1	4.58025e-143	82.76	NA	NA	NA	IPR005856 (TIGRFAM); G3DSA:3.40.50.1100 (GENE3D); IPR005859 (TIGRFAM); G3DSA:3.40.50.1100 (GENE3D); IPR001926 (PFAM); mobidb-lite (MOBIDB_LITE); mobidb-lite (MOBIDB_LITE); mobidb-lite (MOBIDB_LITE); PTHR10314 (PANTHER); PTHR10314:SF194 (PANTHER); IPR001216 (PROSITE_PATTERNS); cd01561 (CDD); IPR036052 (SUPERFAMILY)	F:GO:0004124; P:GO:0006535	F:cysteine synthase activity; P:cysteine biosynthetic process from serine	P47998	5.06013e-144	175651	2.64443e-174	57054	0	PRW56601.1	PRW56601.1 cysteine synthase A [Chlorella sorokiniana]	3076	1.1e-164	57.7052	75.8871	115.007	28.2583	35.1872	39.596	NA	NA	NA	NA	NA	NA
3	OG0000062	6	5	3	g2153	557	O81155	CYSKP_SOLTU Cysteine synthase, chloroplastic/chromoplastic OS=Solanum tuberosum OX=4113 PE=2 SV=1	3.31479e-161	86.56	NA	NA	NA	G3DSA:3.40.50.1100 (GENE3D); IPR005856 (TIGRFAM); IPR036649 (G3DSA:3.90.80.GENE3D); IPR005859 (TIGRFAM); IPR001926 (PFAM); G3DSA:3.40.50.1100 (GENE3D); IPR008162 (PFAM); PTHR10314:SF194 (PANTHER); PTHR10314 (PANTHER); IPR001216 (PROSITE_PATTERNS); IPR008162 (HAMAP); cd01561 (CDD); IPR008162 (CDD); IPR036052 (SUPERFAMILY); IPR036649 (SUPERFAMILY)	F:GO:0000287; F:GO:0004124; F:GO:0004427; C:GO:0005737; P:GO:0006535; P:GO:0006796	F:magnesium ion binding; F:cysteine synthase activity; F:inorganic diphosphatase activity; C:cytoplasm; P:cysteine biosynthetic process from serine; P:phosphate-containing compound metabolic process	P47999	2.39745e-155	205986	2.82583e-164	27694	0	XP_005843968.1	XP_005843968.1 hypothetical protein CHLNCDRAFT_27694 [Chlorella variabilis]<>EFN51866.1 hypothetical protein CHLNCDRAFT_27694 [Chlorella variabilis]	554065	1.7e-166	187.377	170.209	356.187	218.254	174.016	236.973	1.10682	0.0267405	NA	NA	NA	NA
3	OG0000062	6	5	3	g559	351	O81155	CYSKP_SOLTU Cysteine synthase, chloroplastic/chromoplastic OS=Solanum tuberosum OX=4113 PE=2 SV=1	1.16533e-152	80.35	NA	NA	NA	IPR005856 (TIGRFAM); G3DSA:3.40.50.1100 (GENE3D); IPR001926 (PFAM); IPR005859 (TIGRFAM); G3DSA:3.40.50.1100 (GENE3D); PTHR10314:SF194 (PANTHER); PTHR10314 (PANTHER); IPR001216 (PROSITE_PATTERNS); cd01561 (CDD); IPR036052 (SUPERFAMILY)	F:GO:0004124; P:GO:0006535	F:cysteine synthase activity; P:cysteine biosynthetic process from serine	P47998	7.39524e-150	205986	2.27849e-163	145435	0	XP_005847962.1	XP_005847962.1 hypothetical protein CHLNCDRAFT_145435 [Chlorella variabilis]<>EFN55860.1 hypothetical protein CHLNCDRAFT_145435 [Chlorella variabilis]	554065	3e-182	283.589	242.975	1209.92	495.123	321.581	468.908	2.08193	0.000184479	NA	NA	NA	NA
3	OG0000062	6	5	3	g5681	346	Q00834	CYSK_SPIOL Cysteine synthase OS=Spinacia oleracea OX=3562 PE=1 SV=1	6.9157e-124	77.19	NA	NA	NA	G3DSA:3.40.50.1100 (GENE3D); IPR005859 (TIGRFAM); IPR005856 (TIGRFAM); G3DSA:3.40.50.1100 (GENE3D); IPR001926 (PFAM); PTHR10314:SF194 (PANTHER); PTHR10314 (PANTHER); cd01561 (CDD); IPR036052 (SUPERFAMILY)	F:GO:0004124; P:GO:0006535	F:cysteine synthase activity; P:cysteine biosynthetic process from serine	Q43725	1.72102e-120	205986	4.57413e-127	140033	0	XP_005843662.1	XP_005843662.1 hypothetical protein CHLNCDRAFT_140033 [Chlorella variabilis]<>EFN51560.1 hypothetical protein CHLNCDRAFT_140033 [Chlorella variabilis]	554065	5.7e-189	0.76794	0.243853	110.926	3.92848	5.66451	9.14596	7.09133	9.78702e-05	4.34914	0.00930737	NA	NA
NA	OG0000062	6	5	3	g8647	710	O81155	CYSKP_SOLTU Cysteine synthase, chloroplastic/chromoplastic OS=Solanum tuberosum OX=4113 PE=2 SV=1	4.64424e-154	83.18	NA	NA	NA	IPR001926 (PFAM); G3DSA:3.40.50.1100 (GENE3D); IPR005856 (TIGRFAM); IPR005859 (TIGRFAM); G3DSA:3.40.50.1100 (GENE3D); PTHR10314 (PANTHER); PTHR10314:SF194 (PANTHER); IPR001216 (PROSITE_PATTERNS); cd01561 (CDD); IPR036052 (SUPERFAMILY)	F:GO:0004124; P:GO:0006535	F:cysteine synthase activity; P:cysteine biosynthetic process from serine	P47998	1.34673e-148	196886	7.2496e-172	10178	2.51978e-175	PSC70307.1	PSC70307.1 cysteine synthase [Micractinium conductrix]	554055	2.4e-162	240.914	261.996	162.367	112.944	139.981	134.889	NA	NA	NA	NA	NA	NA
NA	OG0000063	2	7	5	g109	701	Q8VXZ5	XG113_ARATH Arabinosyltransferase XEG113 OS=Arabidopsis thaliana OX=3702 GN=XEG113 PE=2 SV=1	5.0969e-37	44.87	12	F:GO:0003796; F:GO:0003824; P:GO:0008152; P:GO:0009253; F:GO:0016787; F:GO:0016798; P:GO:0016998; P:GO:0019076; P:GO:0019835; C:GO:0030430; P:GO:0042742; P:GO:0044659	F:lysozyme activity; F:catalytic activity; P:metabolic process; P:peptidoglycan catabolic process; F:hydrolase activity; F:hydrolase activity, acting on glycosyl bonds; P:cell wall macromolecule catabolic process; P:viral release from host cell; P:cytolysis; C:host cell cytoplasm; P:defense response to bacterium; P:cytolysis by virus of host cell	IPR005069 (PFAM); PTHR46936 (PANTHER); PTHR46936:SF1 (PANTHER)	no GO terms	no GO terms	Q8VXZ5	2.81907e-38	344743	2.85526e-47	143033	0	XP_005849855.1	XP_005849855.1 hypothetical protein CHLNCDRAFT_143033 [Chlorella variabilis]<>EFN57753.1 hypothetical protein CHLNCDRAFT_143033 [Chlorella variabilis]	554065	0	33.1311	59.4026	23.3496	12.1426	13.5852	17.9633	NA	NA	NA	NA	NA	NA
NA	OG0000063	2	7	5	g3006	781	Q8VXZ5	XG113_ARATH Arabinosyltransferase XEG113 OS=Arabidopsis thaliana OX=3702 GN=XEG113 PE=2 SV=1	4.07815e-34	42.31	12	F:GO:0003796; F:GO:0003824; P:GO:0008152; P:GO:0009253; F:GO:0016787; F:GO:0016798; P:GO:0016998; P:GO:0019076; P:GO:0019835; C:GO:0030430; P:GO:0042742; P:GO:0044659	F:lysozyme activity; F:catalytic activity; P:metabolic process; P:peptidoglycan catabolic process; F:hydrolase activity; F:hydrolase activity, acting on glycosyl bonds; P:cell wall macromolecule catabolic process; P:viral release from host cell; P:cytolysis; C:host cell cytoplasm; P:defense response to bacterium; P:cytolysis by virus of host cell	IPR005069 (PFAM); mobidb-lite (MOBIDB_LITE); PTHR46936:SF1 (PANTHER); PTHR46936 (PANTHER)	no GO terms	no GO terms	Q8VXZ5	2.2556e-35	205927	1.18202e-42	58863	0	XP_005844501.1	XP_005844501.1 expressed protein [Chlorella variabilis]<>EFN52399.1 expressed protein [Chlorella variabilis]	554065	0	48.2156	87.3481	32.5334	15.4907	23.0421	39.5412	NA	NA	NA	NA	NA	NA
2	OG0000063	2	7	5	g3930	726	Q8VXZ5	XG113_ARATH Arabinosyltransferase XEG113 OS=Arabidopsis thaliana OX=3702 GN=XEG113 PE=2 SV=1	1.66802e-45	42.86	12	F:GO:0003796; F:GO:0003824; P:GO:0008152; P:GO:0009253; F:GO:0016787; F:GO:0016798; P:GO:0016998; P:GO:0019076; P:GO:0019835; C:GO:0030430; P:GO:0042742; P:GO:0044659	F:lysozyme activity; F:catalytic activity; P:metabolic process; P:peptidoglycan catabolic process; F:hydrolase activity; F:hydrolase activity, acting on glycosyl bonds; P:cell wall macromolecule catabolic process; P:viral release from host cell; P:cytolysis; C:host cell cytoplasm; P:defense response to bacterium; P:cytolysis by virus of host cell	IPR005069 (PFAM); mobidb-lite (MOBIDB_LITE); PTHR46936:SF1 (PANTHER); PTHR46936 (PANTHER)	no GO terms	no GO terms	Q8VXZ5	9.22572e-47	344743	3.53349e-42	143777	0	XP_005849350.1	XP_005849350.1 expressed protein [Chlorella variabilis]<>EFN57248.1 expressed protein [Chlorella variabilis]	554065	0	39.9877	70.6686	85.1151	106.962	91.0642	130.398	1.2839	0.0226214	1.48727	0.00794906	NA	NA
NA	OG0000063	2	7	5	g3931	699	Q8VXZ5	XG113_ARATH Arabinosyltransferase XEG113 OS=Arabidopsis thaliana OX=3702 GN=XEG113 PE=2 SV=1	2.24032e-44	45.45	12	F:GO:0003796; F:GO:0003824; P:GO:0008152; P:GO:0009253; F:GO:0016787; F:GO:0016798; P:GO:0016998; P:GO:0019076; P:GO:0019835; C:GO:0030430; P:GO:0042742; P:GO:0044659	F:lysozyme activity; F:catalytic activity; P:metabolic process; P:peptidoglycan catabolic process; F:hydrolase activity; F:hydrolase activity, acting on glycosyl bonds; P:cell wall macromolecule catabolic process; P:viral release from host cell; P:cytolysis; C:host cell cytoplasm; P:defense response to bacterium; P:cytolysis by virus of host cell	IPR005069 (PFAM); PTHR46936:SF1 (PANTHER); PTHR46936 (PANTHER); IPR029044 (SUPERFAMILY)	no GO terms	no GO terms	Q8VXZ5	1.23911e-45	344743	1.59379e-47	143778	0	XP_005849351.1	XP_005849351.1 hypothetical protein CHLNCDRAFT_143778 [Chlorella variabilis]<>EFN57249.1 hypothetical protein CHLNCDRAFT_143778 [Chlorella variabilis]	554065	0	39.8232	54.9645	25.0903	18.7049	21.4099	35.8171	NA	NA	NA	NA	NA	NA
3	OG0000063	2	7	5	g44	707	Q8VXZ5	XG113_ARATH Arabinosyltransferase XEG113 OS=Arabidopsis thaliana OX=3702 GN=XEG113 PE=2 SV=1	7.24647e-31	41.99	12	F:GO:0003796; F:GO:0003824; P:GO:0008152; P:GO:0009253; F:GO:0016787; F:GO:0016798; P:GO:0016998; P:GO:0019076; P:GO:0019835; C:GO:0030430; P:GO:0042742; P:GO:0044659	F:lysozyme activity; F:catalytic activity; P:metabolic process; P:peptidoglycan catabolic process; F:hydrolase activity; F:hydrolase activity, acting on glycosyl bonds; P:cell wall macromolecule catabolic process; P:viral release from host cell; P:cytolysis; C:host cell cytoplasm; P:defense response to bacterium; P:cytolysis by virus of host cell	IPR005069 (PFAM); mobidb-lite (MOBIDB_LITE); mobidb-lite (MOBIDB_LITE); PTHR46936 (PANTHER); PTHR46936:SF1 (PANTHER)	no GO terms	no GO terms	Q8VXZ5	4.00798e-32	344743	2.45205e-35	141437	0	XP_005843204.1	XP_005843204.1 hypothetical protein CHLNCDRAFT_141437 [Chlorella variabilis]<>EFN51102.1 hypothetical protein CHLNCDRAFT_141437 [Chlorella variabilis]	554065	0	154.74	129.193	579.479	207.094	158.27	197.925	1.84574	0.00119992	NA	NA	NA	NA
NA	OG0000063	2	7	5	g9328	719	Q8VXZ5	XG113_ARATH Arabinosyltransferase XEG113 OS=Arabidopsis thaliana OX=3702 GN=XEG113 PE=2 SV=1	1.42949e-32	42.19	12	F:GO:0003796; F:GO:0003824; P:GO:0008152; P:GO:0009253; F:GO:0016787; F:GO:0016798; P:GO:0016998; P:GO:0019076; P:GO:0019835; C:GO:0030430; P:GO:0042742; P:GO:0044659	F:lysozyme activity; F:catalytic activity; P:metabolic process; P:peptidoglycan catabolic process; F:hydrolase activity; F:hydrolase activity, acting on glycosyl bonds; P:cell wall macromolecule catabolic process; P:viral release from host cell; P:cytolysis; C:host cell cytoplasm; P:defense response to bacterium; P:cytolysis by virus of host cell	IPR005069 (PFAM); PTHR46936:SF1 (PANTHER); PTHR46936 (PANTHER)	no GO terms	no GO terms	Q8VXZ5	7.90645e-34	344743	1.59234e-39	56484	0	XP_005851738.1	XP_005851738.1 hypothetical protein CHLNCDRAFT_56484 [Chlorella variabilis]<>EFN59636.1 hypothetical protein CHLNCDRAFT_56484 [Chlorella variabilis]	554065	1.1e-292	26.0002	29.5062	22.8094	11.6515	12.3371	18.5657	NA	NA	NA	NA	NA	NA
NA	OG0000063	2	7	5	g9330	717	Q8VXZ5	XG113_ARATH Arabinosyltransferase XEG113 OS=Arabidopsis thaliana OX=3702 GN=XEG113 PE=2 SV=1	4.11429e-33	41.61	12	F:GO:0003796; F:GO:0003824; P:GO:0008152; P:GO:0009253; F:GO:0016787; F:GO:0016798; P:GO:0016998; P:GO:0019076; P:GO:0019835; C:GO:0030430; P:GO:0042742; P:GO:0044659	F:lysozyme activity; F:catalytic activity; P:metabolic process; P:peptidoglycan catabolic process; F:hydrolase activity; F:hydrolase activity, acting on glycosyl bonds; P:cell wall macromolecule catabolic process; P:viral release from host cell; P:cytolysis; C:host cell cytoplasm; P:defense response to bacterium; P:cytolysis by virus of host cell	IPR005069 (PFAM); mobidb-lite (MOBIDB_LITE); PTHR46936:SF1 (PANTHER); PTHR46936 (PANTHER)	no GO terms	no GO terms	Q8VXZ5	2.27559e-34	344743	4.16985e-52	133097	0	XP_005852080.1	XP_005852080.1 hypothetical protein CHLNCDRAFT_133097 [Chlorella variabilis]<>EFN59978.1 hypothetical protein CHLNCDRAFT_133097 [Chlorella variabilis]	554065	0	43.0595	53.9403	24.4301	13.7943	15.6494	26.7807	NA	NA	NA	NA	NA	NA
2	OG0000064	5	7	2	g10687	455	Q8LPS5	SERK5_ARATH Somatic embryogenesis receptor kinase 5 OS=Arabidopsis thaliana OX=3702 GN=SERK5 PE=1 SV=2	3.19715e-12	45.98	NA	NA	NA	Coil (COILS); IPR036514 (G3DSA:3.40.50.GENE3D); IPR032675 (G3DSA:3.80.10.GENE3D); IPR013830 (PFAM); mobidb-lite (MOBIDB_LITE); PTHR27000:SF565 (PANTHER); PTHR27000:SF565 (PANTHER); PTHR27000 (PANTHER); PTHR27000 (PANTHER); SSF52266 (SUPERFAMILY); SSF52058 (SUPERFAMILY)	no GO terms	no GO terms	Q8LPS5	1.76833e-13	144672	1.04324e-20	136136	0	XP_005846024.1	XP_005846024.1 hypothetical protein CHLNCDRAFT_136136 [Chlorella variabilis]<>EFN53922.1 hypothetical protein CHLNCDRAFT_136136 [Chlorella variabilis]	554065	1.3e-217	5.92411	18.289	65.487	54.1506	100.425	88.0093	2.74802	1.11466e-05	3.44977	6.46356e-08	NA	NA
3	OG0000064	5	7	2	g1095	257	---NA---	---NA---	NA	NA	NA	NA	NA	IPR036514 (G3DSA:3.40.50.GENE3D); SSF52266 (SUPERFAMILY)	no GO terms	no GO terms	---NA---	NA	---NA---	NA	133124	4.01418e-42	XP_005851748.1	XP_005851748.1 hypothetical protein CHLNCDRAFT_133124 [Chlorella variabilis]<>EFN59646.1 hypothetical protein CHLNCDRAFT_133124 [Chlorella variabilis]	554065	3.6e-31	25.3969	50.5751	55.3428	63.4361	35.1392	34.4479	1.12343	0.0429202	NA	NA	NA	NA
2	OG0000064	5	7	2	g11078	402	Q61205	PA1B3_MOUSE Platelet-activating factor acetylhydrolase IB subunit gamma OS=Mus musculus OX=10090 GN=Pafah1b3 PE=1 SV=1	7.27375e-07	47.92	NA	NA	NA	IPR036514 (G3DSA:3.40.50.GENE3D); IPR013830 (PFAM); mobidb-lite (MOBIDB_LITE); PTHR11852:SF0 (PANTHER); PTHR11852 (PANTHER); SSF52266 (SUPERFAMILY)	no GO terms	no GO terms	---NA---	NA	---NA---	NA	143901	0	XP_005849400.1	XP_005849400.1 expressed protein [Chlorella variabilis]<>EFN57298.1 expressed protein [Chlorella variabilis]	554065	3.9e-234	9.70895	16.0455	170.41	195.353	225.092	242.395	4.30662	2.7808e-15	4.67193	3.44498e-17	NA	NA
3	OG0000064	5	7	2	g5668	357	Q5R4G2	PA1B2_PONAB Platelet-activating factor acetylhydrolase IB subunit beta OS=Pongo abelii OX=9601 GN=PAFAH1B2 PE=2 SV=1	3.675e-08	49.51	NA	NA	NA	Coil (COILS); IPR036514 (G3DSA:3.40.50.GENE3D); IPR013830 (PFAM); mobidb-lite (MOBIDB_LITE); mobidb-lite (MOBIDB_LITE); PTHR11852 (PANTHER); PTHR11852:SF0 (PANTHER); SSF52266 (SUPERFAMILY)	no GO terms	no GO terms	---NA---	NA	---NA---	NA	140047	0	XP_005843668.1	XP_005843668.1 hypothetical protein CHLNCDRAFT_140047 [Chlorella variabilis]<>EFN51566.1 hypothetical protein CHLNCDRAFT_140047 [Chlorella variabilis]	554065	6.7e-177	149.474	132.705	265.369	649.137	252.551	228.978	2.24649	0.000748561	NA	NA	NA	NA
3	OG0000064	5	7	2	g5669	313	O35263	PA1B3_RAT Platelet-activating factor acetylhydrolase IB subunit gamma OS=Rattus norvegicus OX=10116 GN=Pafah1b3 PE=2 SV=1	4.59052e-09	44.71	NA	NA	NA	IPR036514 (G3DSA:3.40.50.GENE3D); IPR013830 (PFAM); mobidb-lite (MOBIDB_LITE); mobidb-lite (MOBIDB_LITE); mobidb-lite (MOBIDB_LITE); PTHR11852:SF0 (PANTHER); PTHR11852 (PANTHER); SSF52266 (SUPERFAMILY)	no GO terms	no GO terms	---NA---	NA	---NA---	NA	55018	0	XP_005843728.1	XP_005843728.1 hypothetical protein CHLNCDRAFT_55018 [Chlorella variabilis]<>EFN51626.1 hypothetical protein CHLNCDRAFT_55018 [Chlorella variabilis]	554065	3.5e-129	91.2751	87.9334	174.132	506.864	207.859	225.308	2.48822	0.000474707	1.7678	0.0138511	NA	NA
1	OG0000064	5	7	2	g9302	269	---NA---	---NA---	NA	NA	NA	NA	NA	IPR036514 (G3DSA:3.40.50.GENE3D); IPR013830 (PFAM); mobidb-lite (MOBIDB_LITE); SSF52266 (SUPERFAMILY)	no GO terms	no GO terms	---NA---	NA	---NA---	NA	133124	1.9688e-152	XP_005851748.1	XP_005851748.1 hypothetical protein CHLNCDRAFT_133124 [Chlorella variabilis]<>EFN59646.1 hypothetical protein CHLNCDRAFT_133124 [Chlorella variabilis]	554065	3.1e-118	14.7006	12.9242	10.1442	3.16957	2.68824	4.43606	NA	NA	-1.46632	0.0308252	NA	NA
NA	OG0000064	5	7	2	g9496	259	---NA---	---NA---	NA	NA	NA	NA	NA	IPR036514 (G3DSA:3.40.50.GENE3D); SSF52266 (SUPERFAMILY)	no GO terms	no GO terms	---NA---	NA	---NA---	NA	54149	2.51596e-155	XP_005844837.1	XP_005844837.1 hypothetical protein CHLNCDRAFT_54149 [Chlorella variabilis]<>EFN52735.1 hypothetical protein CHLNCDRAFT_54149 [Chlorella variabilis]	554065	8.1e-124	70.815	105.393	95.6795	88.3909	88.1839	60.9	NA	NA	NA	NA	NA	NA
1	OG0000065	7	6	1	g3716	524	Q38967	AAP2_ARATH Amino acid permease 2 OS=Arabidopsis thaliana OX=3702 GN=AAP2 PE=1 SV=1	2.79122e-54	53.82	3	C:GO:0005737; P:GO:0007049; P:GO:0051301	C:cytoplasm; P:cell cycle; P:cell division	IPR013057 (PFAM); mobidb-lite (MOBIDB_LITE); mobidb-lite (MOBIDB_LITE); PTHR22950:SF456 (PANTHER); PTHR22950 (PANTHER)	no GO terms	no GO terms	Q38967	1.54381e-55	---NA---	NA	32765	5.51773e-173	PRW60633.1	PRW60633.1 Amino acid permease 2 [Chlorella sorokiniana]	3076	1.7e-144	144.811	156.066	69.4486	40.4455	37.8274	47.9204	-1.03587	0.0262252	-1.31955	0.00423004	NA	NA
1	OG0000065	7	6	1	g5449	573	Q38967	AAP2_ARATH Amino acid permease 2 OS=Arabidopsis thaliana OX=3702 GN=AAP2 PE=1 SV=1	4.78905e-47	49.86	3	C:GO:0005737; P:GO:0007049; P:GO:0051301	C:cytoplasm; P:cell cycle; P:cell division	IPR013057 (PFAM); mobidb-lite (MOBIDB_LITE); mobidb-lite (MOBIDB_LITE); mobidb-lite (MOBIDB_LITE); mobidb-lite (MOBIDB_LITE); PTHR22950 (PANTHER); PTHR22950 (PANTHER); PTHR22950:SF597 (PANTHER); PTHR22950:SF597 (PANTHER)	no GO terms	no GO terms	Q38967	2.6488e-48	---NA---	NA	59057	0	XP_005844000.1	XP_005844000.1 hypothetical protein CHLNCDRAFT_59057 [Chlorella variabilis]<>EFN51898.1 hypothetical protein CHLNCDRAFT_59057 [Chlorella variabilis]	554065	0	209.154	282.821	80.3131	68.7931	75.5108	83.1899	-1.26919	0.00731408	-1.13995	0.0173549	NA	NA
3	OG0000065	7	6	1	g5452	595	Q38967	AAP2_ARATH Amino acid permease 2 OS=Arabidopsis thaliana OX=3702 GN=AAP2 PE=1 SV=1	6.31863e-52	51.21	3	C:GO:0005737; P:GO:0007049; P:GO:0051301	C:cytoplasm; P:cell cycle; P:cell division	IPR013057 (PFAM); mobidb-lite (MOBIDB_LITE); mobidb-lite (MOBIDB_LITE); mobidb-lite (MOBIDB_LITE); mobidb-lite (MOBIDB_LITE); PTHR22950 (PANTHER); PTHR22950 (PANTHER); PTHR22950:SF597 (PANTHER); PTHR22950:SF597 (PANTHER)	no GO terms	no GO terms	Q38967	3.4948e-53	---NA---	NA	32765	0	XP_005844092.1	XP_005844092.1 hypothetical protein CHLNCDRAFT_32765 [Chlorella variabilis]<>EFN51990.1 hypothetical protein CHLNCDRAFT_32765 [Chlorella variabilis]	554065	0	834.421	921.569	1887.6	1795.5	1032.14	1801.26	1.53309	0.00367751	1.17663	0.0291252	NA	NA
3	OG0000065	7	6	1	g5453	595	Q38967	AAP2_ARATH Amino acid permease 2 OS=Arabidopsis thaliana OX=3702 GN=AAP2 PE=1 SV=1	1.75185e-52	50.4	3	C:GO:0005737; P:GO:0007049; P:GO:0051301	C:cytoplasm; P:cell cycle; P:cell division	IPR013057 (PFAM); mobidb-lite (MOBIDB_LITE); mobidb-lite (MOBIDB_LITE); mobidb-lite (MOBIDB_LITE); mobidb-lite (MOBIDB_LITE); PTHR22950:SF597 (PANTHER); PTHR22950 (PANTHER); PTHR22950:SF597 (PANTHER); PTHR22950 (PANTHER)	no GO terms	no GO terms	Q38967	9.68941e-54	---NA---	NA	32765	0	XP_005844092.1	XP_005844092.1 hypothetical protein CHLNCDRAFT_32765 [Chlorella variabilis]<>EFN51990.1 hypothetical protein CHLNCDRAFT_32765 [Chlorella variabilis]	554065	0	762.509	834.319	1883.58	1766.52	1137.22	1708.49	1.65586	0.00100965	1.32228	0.0096705	NA	NA
2	OG0000065	7	6	1	g5456	949	Q39134	AAP3_ARATH Amino acid permease 3 OS=Arabidopsis thaliana OX=3702 GN=AAP3 PE=1 SV=2	5.93061e-25	50.21	10	F:GO:0003674; F:GO:0004735; C:GO:0005575; C:GO:0005737; P:GO:0006561; P:GO:0008150; P:GO:0008652; F:GO:0016491; P:GO:0055114; P:GO:0055129	F:molecular_function; F:pyrroline-5-carboxylate reductase activity; C:cellular_component; C:cytoplasm; P:proline biosynthetic process; P:biological_process; P:cellular amino acid biosynthetic process; F:oxidoreductase activity; P:oxidation-reduction process; P:L-proline biosynthetic process	IPR013057 (PFAM); IPR013762 (G3DSA:1.10.443.GENE3D); mobidb-lite (MOBIDB_LITE); PTHR22950 (PANTHER); PTHR22950:SF274 (PANTHER); IPR011010 (SUPERFAMILY)	F:GO:0003677; P:GO:0006310; P:GO:0015074	F:DNA binding; P:DNA recombination; P:DNA integration	Q39134	3.28019e-26	403847	5.92551e-15	32765	0	XP_005844092.1	XP_005844092.1 hypothetical protein CHLNCDRAFT_32765 [Chlorella variabilis]<>EFN51990.1 hypothetical protein CHLNCDRAFT_32765 [Chlorella variabilis]	554065	5.4e-157	404.485	274.188	439.981	717.127	692.414	791.481	1.2879	0.0313544	1.62444	0.00617584	NA	NA
NA	OG0000065	7	6	1	g7960	570	Q38967	AAP2_ARATH Amino acid permease 2 OS=Arabidopsis thaliana OX=3702 GN=AAP2 PE=1 SV=1	6.56004e-54	54.05	3	C:GO:0005737; P:GO:0007049; P:GO:0051301	C:cytoplasm; P:cell cycle; P:cell division	IPR013057 (PFAM); mobidb-lite (MOBIDB_LITE); mobidb-lite (MOBIDB_LITE); PTHR22950:SF456 (PANTHER); PTHR22950 (PANTHER); PTHR22950 (PANTHER); PTHR22950:SF456 (PANTHER)	no GO terms	no GO terms	Q38967	3.62832e-55	---NA---	NA	138133	0	XP_005851603.1	XP_005851603.1 hypothetical protein CHLNCDRAFT_138133 [Chlorella variabilis]<>EFN59501.1 hypothetical protein CHLNCDRAFT_138133 [Chlorella variabilis]	554065	8.8e-288	43.8823	34.5784	33.0736	27.5887	18.5297	20.9207	NA	NA	NA	NA	NA	NA
3	OG0000067	1	9	4	g24	1361	Q869X3	Y9851_DICDI Probable serine/threonine-protein kinase DDB_G0275165 OS=Dictyostelium discoideum OX=44689 GN=DDB_G0275165 PE=3 SV=1	2.44746e-25	52.67	NA	NA	NA	IPR000719 (SMART); IPR000719 (PFAM); IPR032675 (G3DSA:3.80.10.GENE3D); IPR032675 (G3DSA:3.80.10.GENE3D); G3DSA:1.10.510.10 (GENE3D); mobidb-lite (MOBIDB_LITE); mobidb-lite (MOBIDB_LITE); mobidb-lite (MOBIDB_LITE); mobidb-lite (MOBIDB_LITE); mobidb-lite (MOBIDB_LITE); mobidb-lite (MOBIDB_LITE); mobidb-lite (MOBIDB_LITE); mobidb-lite (MOBIDB_LITE); mobidb-lite (MOBIDB_LITE); mobidb-lite (MOBIDB_LIT…	F:GO:0004672; F:GO:0005524; P:GO:0006468	F:protein kinase activity; F:ATP binding; P:protein phosphorylation	C0LGE0	5.29545e-25	283610	5.26892e-24	141452	0	XP_005843209.1	XP_005843209.1 hypothetical protein CHLNCDRAFT_141452 [Chlorella variabilis]<>EFN51107.1 hypothetical protein CHLNCDRAFT_141452 [Chlorella variabilis]	554065	0	830.911	674.156	2055.97	2342.27	2100.57	1657.12	2.03091	8.10727e-05	1.82068	0.000478134	NA	NA
NA	OG0000067	1	9	4	g2440	904	Q91YJ3	THYN1_MOUSE Thymocyte nuclear protein 1 OS=Mus musculus OX=10090 GN=Thyn1 PE=1 SV=1	3.3627e-51	72.29	NA	NA	NA	IPR001245 (PFAM); G3DSA:3.10.590.10 (GENE3D); G3DSA:1.10.510.10 (GENE3D); IPR002740 (PFAM); IPR013210 (PFAM); IPR032675 (G3DSA:3.80.10.GENE3D); mobidb-lite (MOBIDB_LITE); mobidb-lite (MOBIDB_LITE); PTHR14087:SF7 (PANTHER); PTHR14087 (PANTHER); IPR017441 (PROSITE_PATTERNS); IPR008266 (PROSITE_PATTERNS); IPR000719 (PROSITE_PROFILES); SSF52058 (SUPERFAMILY); IPR011009 (SUPERFAMILY); IPR015947 (SUPER…	F:GO:0004672; F:GO:0005524; P:GO:0006468	F:protein kinase activity; F:ATP binding; P:protein phosphorylation	C0LGJ1	1.45214e-22	185829	8.13405e-52	141610	1.10178e-148	XP_005852310.1	XP_005852310.1 hypothetical protein CHLNCDRAFT_143410 [Chlorella variabilis]<>EFN50664.1 hypothetical protein CHLNCDRAFT_143410 [Chlorella variabilis]	554065	1.7e-128	176.681	218.053	130.014	80.9357	98.3128	115.228	NA	NA	NA	NA	NA	NA
3	OG0000067	1	9	4	g2441	877	Q54VC0	Y9865_DICDI Probable serine/threonine-protein kinase DDB_G0280461 OS=Dictyostelium discoideum OX=44689 GN=DDB_G0280461 PE=3 SV=1	6.44001e-27	49.6	NA	NA	NA	IPR000719 (PFAM); IPR032675 (G3DSA:3.80.10.GENE3D); G3DSA:1.10.510.10 (GENE3D); IPR032675 (G3DSA:3.80.10.GENE3D); mobidb-lite (MOBIDB_LITE); mobidb-lite (MOBIDB_LITE); mobidb-lite (MOBIDB_LITE); PTHR44329 (PANTHER); IPR017441 (PROSITE_PATTERNS); IPR008266 (PROSITE_PATTERNS); IPR000719 (PROSITE_PROFILES); SSF52047 (SUPERFAMILY); IPR011009 (SUPERFAMILY)	F:GO:0004672; F:GO:0005524; P:GO:0006468	F:protein kinase activity; F:ATP binding; P:protein phosphorylation	Q9LJF3	5.17388e-24	144672	3.35052e-27	143410	0	XP_005852310.1	XP_005852310.1 hypothetical protein CHLNCDRAFT_143410 [Chlorella variabilis]<>EFN50664.1 hypothetical protein CHLNCDRAFT_143410 [Chlorella variabilis]	554065	0	78.0556	70.3272	142.679	230.977	132.396	143.761	1.84818	0.000698296	1.39107	0.0121337	NA	NA
3	OG0000067	1	9	4	g4731	888	Q54VC0	Y9865_DICDI Probable serine/threonine-protein kinase DDB_G0280461 OS=Dictyostelium discoideum OX=44689 GN=DDB_G0280461 PE=3 SV=1	6.38472e-26	46.85	NA	NA	NA	IPR032675 (G3DSA:3.80.10.GENE3D); G3DSA:1.10.510.10 (GENE3D); IPR001245 (PFAM); mobidb-lite (MOBIDB_LITE); mobidb-lite (MOBIDB_LITE); PTHR44329 (PANTHER); IPR008266 (PROSITE_PATTERNS); IPR017441 (PROSITE_PATTERNS); IPR000719 (PROSITE_PROFILES); SSF52047 (SUPERFAMILY); IPR011009 (SUPERFAMILY)	F:GO:0004672; F:GO:0005524; P:GO:0006468	F:protein kinase activity; F:ATP binding; P:protein phosphorylation	O64771	4.66682e-24	283610	6.21088e-23	56654	0	XP_005851383.1	XP_005851383.1 expressed protein [Chlorella variabilis]<>EFN59281.1 expressed protein [Chlorella variabilis]	554065	0	290.336	140.557	400.245	730.832	539.664	357.842	1.92226	0.00498309	1.5649	0.0242047	NA	NA
1	OG0000067	1	9	4	g4737	785	Q6ZCZ2	BRL3_ORYSJ Brassinosteroid LRR receptor kinase BRL3 OS=Oryza sativa subsp. japonica OX=39947 GN=BRL3 PE=2 SV=1	5.50329e-26	40.98	9	F:GO:0003824; F:GO:0004648; C:GO:0005737; P:GO:0006564; F:GO:0008483; P:GO:0008615; P:GO:0008652; F:GO:0016740; F:GO:0030170	F:catalytic activity; F:O-phospho-L-serine:2-oxoglutarate aminotransferase activity; C:cytoplasm; P:L-serine biosynthetic process; F:transaminase activity; P:pyridoxine biosynthetic process; P:cellular amino acid biosynthetic process; F:transferase activity; F:pyridoxal phosphate binding	IPR032675 (G3DSA:3.80.10.GENE3D); IPR032675 (G3DSA:3.80.10.GENE3D); G3DSA:1.10.510.10 (GENE3D); IPR000719 (PFAM); mobidb-lite (MOBIDB_LITE); mobidb-lite (MOBIDB_LITE); PTHR27006 (PANTHER); PTHR27006:SF148 (PANTHER); PTHR27006 (PANTHER); PTHR27006:SF148 (PANTHER); IPR008266 (PROSITE_PATTERNS); IPR017441 (PROSITE_PATTERNS); IPR000719 (PROSITE_PROFILES); IPR011009 (SUPERFAMILY); SSF52058 (SUPERFAMIL…	F:GO:0004672; F:GO:0005524; P:GO:0006468	F:protein kinase activity; F:ATP binding; P:protein phosphorylation	Q9LP24	7.7926e-25	144672	1.54172e-24	137605	0	XP_005851085.1	XP_005851085.1 hypothetical protein CHLNCDRAFT_137605 [Chlorella variabilis]<>EFN58983.1 hypothetical protein CHLNCDRAFT_137605 [Chlorella variabilis]	554065	0	135.596	143.044	47.6597	30.6243	35.3312	55.9711	-1.40491	0.00283389	-1.12167	0.0192668	NA	NA
NA	OG0000067	1	9	4	g4738	887	Q54VC0	Y9865_DICDI Probable serine/threonine-protein kinase DDB_G0280461 OS=Dictyostelium discoideum OX=44689 GN=DDB_G0280461 PE=3 SV=1	1.04021e-23	48.83	NA	NA	NA	Coil (COILS); G3DSA:1.10.510.10 (GENE3D); IPR001245 (PFAM); IPR032675 (G3DSA:3.80.10.GENE3D); mobidb-lite (MOBIDB_LITE); mobidb-lite (MOBIDB_LITE); PTHR44329 (PANTHER); IPR017441 (PROSITE_PATTERNS); IPR000719 (PROSITE_PROFILES); IPR011009 (SUPERFAMILY); SSF52058 (SUPERFAMILY)	F:GO:0004672; F:GO:0005524; P:GO:0006468	F:protein kinase activity; F:ATP binding; P:protein phosphorylation	C0LGQ7	2.54279e-20	144672	4.08467e-24	137597	0	XP_005851377.1	XP_005851377.1 hypothetical protein CHLNCDRAFT_137597 [Chlorella variabilis]<>EFN59275.1 hypothetical protein CHLNCDRAFT_137597 [Chlorella variabilis]	554065	6.2e-256	112.009	88.226	102.882	115.712	75.3188	87.3521	NA	NA	NA	NA	NA	NA
NA	OG0000067	1	9	4	g4744	867	Q54VC0	Y9865_DICDI Probable serine/threonine-protein kinase DDB_G0280461 OS=Dictyostelium discoideum OX=44689 GN=DDB_G0280461 PE=3 SV=1	1.08171e-26	49.26	NA	NA	NA	IPR000719 (SMART); IPR032675 (G3DSA:3.80.10.GENE3D); IPR032675 (G3DSA:3.80.10.GENE3D); IPR000719 (PFAM); G3DSA:1.10.510.10 (GENE3D); mobidb-lite (MOBIDB_LITE); mobidb-lite (MOBIDB_LITE); mobidb-lite (MOBIDB_LITE); PTHR27000:SF617 (PANTHER); PTHR27000 (PANTHER); IPR017441 (PROSITE_PATTERNS); IPR008271 (PROSITE_PATTERNS); IPR000719 (PROSITE_PROFILES); SSF52047 (SUPERFAMILY); IPR011009 (SUPERFAMILY)	F:GO:0004672; F:GO:0005524; P:GO:0006468	F:protein kinase activity; F:ATP binding; P:protein phosphorylation	C0LGQ5	9.49768e-25	144672	2.176e-22	137597	0	XP_005851377.1	XP_005851377.1 hypothetical protein CHLNCDRAFT_137597 [Chlorella variabilis]<>EFN59275.1 hypothetical protein CHLNCDRAFT_137597 [Chlorella variabilis]	554065	0	335.974	327.885	569.635	366.956	580.228	362.771	NA	NA	NA	NA	NA	NA
1	OG0000067	1	9	4	g5349	704	Q9SGP2	HSL1_ARATH Receptor-like protein kinase HSL1 OS=Arabidopsis thaliana OX=3702 GN=HSL1 PE=2 SV=1	1.84426e-14	44.96	NA	NA	NA	IPR032675 (G3DSA:3.80.10.GENE3D); mobidb-lite (MOBIDB_LITE); mobidb-lite (MOBIDB_LITE); mobidb-lite (MOBIDB_LITE); mobidb-lite (MOBIDB_LITE); PTHR27000 (PANTHER); PTHR27000:SF484 (PANTHER); SSF52058 (SUPERFAMILY)	no GO terms	no GO terms	Q9SGP2	1.02005e-15	144672	1.59025e-30	137265	0	XP_005845033.1	XP_005845033.1 hypothetical protein CHLNCDRAFT_137265 [Chlorella variabilis]<>EFN52931.1 hypothetical protein CHLNCDRAFT_137265 [Chlorella variabilis]	554065	1.1e-196	91.1106	110.124	38.5959	32.7671	45.7001	81.3278	-1.04273	0.0379855	NA	NA	NA	NA
1	OG0000067	1	9	4	g8189	729	Q54TH6	Y9863_DICDI Probable serine/threonine-protein kinase DDB_G0281745 OS=Dictyostelium discoideum OX=44689 GN=DDB_G0281745 PE=3 SV=1	1.88414e-29	47.19	NA	NA	NA	IPR000719 (SMART); IPR032675 (G3DSA:3.80.10.GENE3D); G3DSA:1.10.510.10 (GENE3D); IPR032675 (G3DSA:3.80.10.GENE3D); IPR000719 (PFAM); mobidb-lite (MOBIDB_LITE); PTHR44329 (PANTHER); IPR008271 (PROSITE_PATTERNS); IPR017441 (PROSITE_PATTERNS); IPR000719 (PROSITE_PROFILES); SSF52058 (SUPERFAMILY); IPR011009 (SUPERFAMILY)	F:GO:0004672; F:GO:0005524; P:GO:0006468	F:protein kinase activity; F:ATP binding; P:protein phosphorylation	Q9SHI2	1.53659e-27	376425	4.44766e-21	136507	0	XP_005845797.1	XP_005845797.1 hypothetical protein CHLNCDRAFT_136507 [Chlorella variabilis]<>EFN53695.1 hypothetical protein CHLNCDRAFT_136507 [Chlorella variabilis]	554065	1.6e-209	114.094	126.267	53.1219	38.6152	49.6365	52.5756	-0.951368	0.0328932	NA	NA	NA	NA
3	OG0000068	11	1	1	g2943	369	---NA---	---NA---	NA	NA	NA	NA	NA	mobidb-lite (MOBIDB_LITE); mobidb-lite (MOBIDB_LITE)	no GO terms	no GO terms	---NA---	NA	---NA---	NA	---NA---	NA	PRW20937.1	PRW20937.1 hypothetical protein C2E21_8579 [Chlorella sorokiniana]	3076	9.1e-28	10.3672	8.04715	19.328	14.3747	11.7131	11.008	1.31441	0.0080313	NA	NA	NA	NA
NA	OG0000069	4	4	5	g2323	680	---NA---	---NA---	NA	NA	NA	NA	NA	IPR002035 (SMART); IPR036465 (G3DSA:3.40.50.GENE3D); IPR002035 (PFAM); PTHR10579 (PANTHER); PTHR10579:SF121 (PANTHER); IPR002035 (PROSITE_PROFILES); IPR036465 (SUPERFAMILY)	no GO terms	no GO terms	---NA---	NA	---NA---	NA	35166	0	PRW44991.1	PRW44991.1 elongation factor 2 [Chlorella sorokiniana]	3076	3.5e-219	903.755	968.828	624.377	705.431	808.393	722.202	NA	NA	NA	NA	NA	NA
NA	OG0000069	4	4	5	g6167	1782	Q9STN3	SPT51_ARATH Putative transcription elongation factor SPT5 homolog 1 OS=Arabidopsis thaliana OX=3702 GN=At4g08350 PE=1 SV=2	4.50631e-151	52.19	NA	NA	NA	Coil (COILS); IPR006645 (SMART); IPR005824 (SMART); IPR002035 (SMART); IPR036465 (G3DSA:3.40.50.GENE3D); IPR005100 (PFAM); IPR036735 (G3DSA:3.30.70.GENE3D); IPR002035 (PFAM); IPR014722 (G3DSA:2.30.30.GENE3D); IPR014722 (G3DSA:2.30.30.GENE3D); IPR022581 (PFAM); IPR014722 (G3DSA:2.30.30.GENE3D); mobidb-lite (MOBIDB_LITE); mobidb-lite (MOBIDB_LITE); mobidb-lite (MOBIDB_LITE); mobidb-lite (MOBIDB_LIT…	F:GO:0003735; C:GO:0005840; P:GO:0006355; P:GO:0006357; P:GO:0006412; P:GO:0032784	F:structural constituent of ribosome; C:ribosome; P:regulation of transcription, DNA-templated; P:regulation of transcription by RNA polymerase II; P:translation; P:regulation of DNA-templated transcription, elongation	Q9STN3	2.49241e-152	146549	6.91341e-138	142577	0	PRW59844.1	PRW59844.1 transcription elongation factor SPT5-like protein 1 [Chlorella sorokiniana]	3076	0	195.057	229.027	211.287	107.542	167.967	191.956	NA	NA	NA	NA	NA	NA
NA	OG0000069	4	4	5	g6169	569	---NA---	---NA---	NA	NA	NA	NA	NA	IPR002035 (SMART); IPR002035 (PFAM); IPR036465 (G3DSA:3.40.50.GENE3D); IPR002035 (PROSITE_PROFILES); IPR036465 (SUPERFAMILY)	no GO terms	no GO terms	---NA---	NA	---NA---	NA	142575	0	XP_005842829.1	XP_005842829.1 hypothetical protein CHLNCDRAFT_142575 [Chlorella variabilis]<>EFN50717.1 hypothetical protein CHLNCDRAFT_142575 [Chlorella variabilis]	554065	0	0.329117	0.292624	0.12005	0.223209	0.144013	0	NA	NA	NA	NA	NA	NA
3	OG0000069	4	4	5	g7830	831	---NA---	---NA---	NA	NA	NA	NA	NA	Coil (COILS); IPR002035 (SMART); IPR002035 (PFAM); IPR036465 (G3DSA:3.40.50.GENE3D); mobidb-lite (MOBIDB_LITE); mobidb-lite (MOBIDB_LITE); mobidb-lite (MOBIDB_LITE); mobidb-lite (MOBIDB_LITE); mobidb-lite (MOBIDB_LITE); mobidb-lite (MOBIDB_LITE); mobidb-lite (MOBIDB_LITE); IPR002035 (PROSITE_PROFILES); IPR036465 (SUPERFAMILY)	no GO terms	no GO terms	---NA---	NA	---NA---	NA	143466	0	XP_005849036.1	XP_005849036.1 hypothetical protein CHLNCDRAFT_143466 [Chlorella variabilis]<>EFN56934.1 hypothetical protein CHLNCDRAFT_143466 [Chlorella variabilis]	554065	0	90.5072	37.4071	390.701	852.079	268.968	290.042	3.8258	3.29931e-07	2.62716	0.000367229	NA	NA
NA	OG0000070	8	5	0	g1708	261	---NA---	---NA---	NA	NA	NA	NA	NA	IPR009030 (SUPERFAMILY)	no GO terms	no GO terms	---NA---	NA	---NA---	NA	135408	2.7793e-25	XP_005846683.1	XP_005846683.1 hypothetical protein CHLNCDRAFT_135408 [Chlorella variabilis]<>EFN54581.1 hypothetical protein CHLNCDRAFT_135408 [Chlorella variabilis]	554065	1.9e-16	7.89881	1.90205	7.80322	8.08018	2.11219	5.09326	NA	NA	NA	NA	NA	NA
NA	OG0000070	8	5	0	g2763	212	Q16363	LAMA4_HUMAN Laminin subunit alpha-4 OS=Homo sapiens OX=9606 GN=LAMA4 PE=1 SV=4	2.88654e-08	36.71	NA	NA	NA	IPR000742 (SMART); IPR009030 (SUPERFAMILY); IPR009030 (SUPERFAMILY)	no GO terms	no GO terms	---NA---	NA	---NA---	NA	140931	1.49477e-148	XP_005850763.1	XP_005850763.1 hypothetical protein CHLNCDRAFT_140931 [Chlorella variabilis]<>EFN58661.1 hypothetical protein CHLNCDRAFT_140931 [Chlorella variabilis]	554065	3.6e-29	0	0	0	0	0.0480043	0	NA	NA	NA	NA	NA	NA
1	OG0000070	8	5	0	g6121	322	Q86XX4	FRAS1_HUMAN Extracellular matrix protein FRAS1 OS=Homo sapiens OX=9606 GN=FRAS1 PE=1 SV=2	2.17806e-06	36.08	19	C:GO:0016020; C:GO:0016021; P:GO:0016032; C:GO:0019012; C:GO:0019031; P:GO:0019062; P:GO:0019065; C:GO:0020002; C:GO:0033644; P:GO:0039654; P:GO:0039663; C:GO:0044165; C:GO:0044167; C:GO:0044177; C:GO:0044178; P:GO:0046718; F:GO:0046872; C:GO:0055036; P:GO:0075509	C:membrane; C:integral component of membrane; P:viral process; C:virion; C:viral envelope; P:virion attachment to host cell; P:receptor-mediated endocytosis of virus by host cell; C:host cell plasma membrane; C:host cell membrane; P:fusion of virus membrane with host endosome membrane; P:membrane fusion involved in viral entry into host cell; C:host cell endoplasmic reticulum; C:host cell endopla…	mobidb-lite (MOBIDB_LITE); mobidb-lite (MOBIDB_LITE); IPR009030 (SUPERFAMILY)	no GO terms	no GO terms	---NA---	NA	---NA---	NA	135413	0	XP_005846685.1	XP_005846685.1 hypothetical protein CHLNCDRAFT_135413 [Chlorella variabilis]<>EFN54583.1 hypothetical protein CHLNCDRAFT_135413 [Chlorella variabilis]	554065	3.5e-116	115.904	158.114	3.60149	17.4103	4.22438	9.14596	-3.11348	0.00164702	-3.87456	0.000136329	NA	NA
1	OG0000070	8	5	0	g7635	211	---NA---	---NA---	NA	NA	NA	NA	NA	IPR000742 (SMART); IPR009030 (SUPERFAMILY)	no GO terms	no GO terms	---NA---	NA	---NA---	NA	135408	5.75455e-153	XP_005846683.1	XP_005846683.1 hypothetical protein CHLNCDRAFT_135408 [Chlorella variabilis]<>EFN54581.1 hypothetical protein CHLNCDRAFT_135408 [Chlorella variabilis]	554065	5.8e-104	742.269	816.517	25.0303	129.551	10.1289	30.2309	-2.73851	0.0118551	-4.79204	3.51726e-05	NA	NA
3	OG0000070	8	5	0	g7636	211	---NA---	---NA---	NA	NA	NA	NA	NA	PS51257 (PROSITE_PROFILES); IPR009030 (SUPERFAMILY)	no GO terms	no GO terms	---NA---	NA	---NA---	NA	135407	3.02673e-137	XP_005846682.1	XP_005846682.1 hypothetical protein CHLNCDRAFT_135407 [Chlorella variabilis]<>EFN54580.1 hypothetical protein CHLNCDRAFT_135407 [Chlorella variabilis]	554065	5.2e-60	56.5533	35.6025	61.5254	167.898	42.1958	66.7052	1.87608	0.00991355	NA	NA	NA	NA
NA	OG0000071	5	7	1	g11401	273	---NA---	---NA---	NA	NA	NA	NA	NA	mobidb-lite (MOBIDB_LITE)	no GO terms	no GO terms	---NA---	NA	---NA---	NA	58716	3.89963e-12	PRW55941.1	PRW55941.1 iron transporter [Chlorella sorokiniana]	3076	1.3e-23	1.81014	0.975412	0.600248	0.401777	0.576052	0.711961	NA	NA	NA	NA	NA	NA
1	OG0000071	5	7	1	g4802	287	---NA---	---NA---	NA	NA	NA	NA	NA	no IPS match	no IPS match	no IPS match	---NA---	NA	---NA---	NA	58716	1.40738e-10	PRW55941.1	PRW55941.1 iron transporter [Chlorella sorokiniana]	3076	4.3e-25	15.1394	12.9242	4.68193	2.58923	3.26429	3.99793	-1.53335	0.00589075	-1.45586	0.00941874	NA	NA
NA	OG0000071	5	7	1	g5342	289	---NA---	---NA---	NA	NA	NA	NA	NA	no IPS match	no IPS match	no IPS match	---NA---	NA	---NA---	NA	58716	1.26264e-11	PRW45363.1	PRW45363.1 hypothetical protein C2E21_6080 [Chlorella sorokiniana]	3076	1.8e-26	34.9961	18.5328	20.7686	10.223	16.4655	15.225	NA	NA	NA	NA	NA	NA
NA	OG0000071	5	7	1	g6238	195	---NA---	---NA---	NA	NA	NA	NA	NA	no IPS match	no IPS match	no IPS match	---NA---	NA	---NA---	NA	58716	4.71779e-07	PRW21013.1	PRW21013.1 mRNA cap guanine-N7 methyltransferase [Chlorella sorokiniana]	3076	1e-17	5.70469	3.56025	0.960396	1.60711	0.480043	2.24541	NA	NA	NA	NA	NA	NA
NA	OG0000071	5	7	1	g6239	138	---NA---	---NA---	NA	NA	NA	NA	NA	no IPS match	no IPS match	no IPS match	---NA---	NA	---NA---	NA	58716	3.97732e-06	PRW55941.1	PRW55941.1 iron transporter [Chlorella sorokiniana]	3076	6.7e-16	9.27013	7.07174	5.46225	8.12482	2.30421	3.94317	NA	NA	NA	NA	NA	NA
1	OG0000071	5	7	1	g6242	248	---NA---	---NA---	NA	NA	NA	NA	NA	no IPS match	no IPS match	no IPS match	---NA---	NA	---NA---	NA	58716	6.28464e-19	PRW21013.1	PRW21013.1 mRNA cap guanine-N7 methyltransferase [Chlorella sorokiniana]	3076	5.5e-29	13.5487	7.4619	0.900371	1.96424	1.87217	4.60036	-2.32455	0.00444866	NA	NA	NA	NA
1	OG0000071	5	7	1	g928	353	---NA---	---NA---	NA	NA	NA	NA	NA	mobidb-lite (MOBIDB_LITE); mobidb-lite (MOBIDB_LITE); mobidb-lite (MOBIDB_LITE)	no GO terms	no GO terms	---NA---	NA	---NA---	NA	58716	1.03828e-21	PRW45363.1	PRW45363.1 hypothetical protein C2E21_6080 [Chlorella sorokiniana]	3076	6.2e-50	19.5825	13.2168	4.62191	3.57135	4.51241	4.5456	-1.55225	0.00454913	-1.35685	0.0141504	NA	NA
1	OG0000073	3	6	4	g1177	578	Q9SIA5	DTX1_ARATH Protein DETOXIFICATION 1 OS=Arabidopsis thaliana OX=3702 GN=DTX1 PE=2 SV=1	6.05131e-85	55.26	NA	NA	NA	IPR002528 (PFAM); IPR002528 (TIGRFAM); mobidb-lite (MOBIDB_LITE); mobidb-lite (MOBIDB_LITE); PTHR11206 (PANTHER); cd13132 (CDD)	P:GO:0006855; F:GO:0015297; C:GO:0016020; F:GO:0042910; P:GO:0055085	P:drug transmembrane transport; F:antiporter activity; C:membrane; F:xenobiotic transmembrane transporter activity; P:transmembrane transport	Q9SIA5	3.34694e-86	135238	1.14499e-100	142267	0	XP_005850390.1	XP_005850390.1 hypothetical protein CHLNCDRAFT_142267 [Chlorella variabilis]<>EFN58288.1 hypothetical protein CHLNCDRAFT_142267 [Chlorella variabilis]	554065	2.2e-294	20.131	35.6513	7.80322	3.66063	6.6246	7.11961	-1.88785	0.00114578	-1.52946	0.00899188	NA	NA
3	OG0000073	3	6	4	g4601	577	Q9FHB6	DTX16_ARATH Protein DETOXIFICATION 16 OS=Arabidopsis thaliana OX=3702 GN=DTX16 PE=2 SV=1	2.48371e-89	56.64	NA	NA	NA	IPR002528 (TIGRFAM); IPR002528 (PFAM); mobidb-lite (MOBIDB_LITE); mobidb-lite (MOBIDB_LITE); PTHR11206 (PANTHER); cd13132 (CDD)	P:GO:0006855; F:GO:0015297; C:GO:0016020; F:GO:0042910; P:GO:0055085	P:drug transmembrane transport; F:antiporter activity; C:membrane; F:xenobiotic transmembrane transporter activity; P:transmembrane transport	Q9FHB6	1.37373e-90	135238	6.31945e-102	19008	0	XP_005851143.1	XP_005851143.1 hypothetical protein CHLNCDRAFT_19008 [Chlorella variabilis]<>EFN59041.1 hypothetical protein CHLNCDRAFT_19008 [Chlorella variabilis]	554065	5.8e-231	18.4854	27.214	32.2333	36.5617	28.4186	31.0524	1.06938	0.0352531	NA	NA	NA	NA
1	OG0000073	3	6	4	g8435	576	Q9FHB6	DTX16_ARATH Protein DETOXIFICATION 16 OS=Arabidopsis thaliana OX=3702 GN=DTX16 PE=2 SV=1	5.09248e-72	53.13	NA	NA	NA	IPR002528 (PFAM); IPR002528 (TIGRFAM); mobidb-lite (MOBIDB_LITE); mobidb-lite (MOBIDB_LITE); PTHR11206 (PANTHER); cd13132 (CDD)	P:GO:0006855; F:GO:0015297; C:GO:0016020; F:GO:0042910; P:GO:0055085	P:drug transmembrane transport; F:antiporter activity; C:membrane; F:xenobiotic transmembrane transporter activity; P:transmembrane transport	Q9FHB6	2.81662e-73	135238	5.91466e-90	58521	0	XP_005845653.1	XP_005845653.1 hypothetical protein CHLNCDRAFT_58521 [Chlorella variabilis]<>EFN53551.1 hypothetical protein CHLNCDRAFT_58521 [Chlorella variabilis]	554065	1.5e-306	110.638	84.1781	53.0019	29.3743	37.0113	30.0666	NA	NA	-1.03726	0.032682	NA	NA
NA	OG0000073	3	6	4	g9171	656	Q9SIA5	DTX1_ARATH Protein DETOXIFICATION 1 OS=Arabidopsis thaliana OX=3702 GN=DTX1 PE=2 SV=1	3.75298e-82	53.52	NA	NA	NA	IPR002528 (TIGRFAM); IPR002528 (PFAM); mobidb-lite (MOBIDB_LITE); mobidb-lite (MOBIDB_LITE); mobidb-lite (MOBIDB_LITE); PTHR11206 (PANTHER); cd13132 (CDD)	P:GO:0006855; F:GO:0015297; C:GO:0016020; F:GO:0042910; P:GO:0055085	P:drug transmembrane transport; F:antiporter activity; C:membrane; F:xenobiotic transmembrane transporter activity; P:transmembrane transport	Q9SIA5	2.07575e-83	135238	2.31594e-89	133260	0	XP_005851806.1	XP_005851806.1 hypothetical protein CHLNCDRAFT_133260 [Chlorella variabilis]<>EFN59704.1 hypothetical protein CHLNCDRAFT_133260 [Chlorella variabilis]	554065	1.5e-267	45.1439	59.2563	25.5105	27.7672	57.7492	49.7825	NA	NA	NA	NA	NA	NA
2	OG0000073	3	6	4	g9809	541	Q9FHB6	DTX16_ARATH Protein DETOXIFICATION 16 OS=Arabidopsis thaliana OX=3702 GN=DTX16 PE=2 SV=1	9.4446e-85	59.03	NA	NA	NA	IPR002528 (TIGRFAM); IPR002528 (PFAM); mobidb-lite (MOBIDB_LITE); PTHR11206 (PANTHER); cd13132 (CDD)	P:GO:0006855; F:GO:0015297; C:GO:0016020; F:GO:0042910; P:GO:0055085	P:drug transmembrane transport; F:antiporter activity; C:membrane; F:xenobiotic transmembrane transporter activity; P:transmembrane transport	Q9FHB6	5.22376e-86	135238	9.97487e-101	54230	0	XP_005845002.1	XP_005845002.1 hypothetical protein CHLNCDRAFT_54230 [Chlorella variabilis]<>EFN52900.1 hypothetical protein CHLNCDRAFT_54230 [Chlorella variabilis]	554065	4.8e-259	8.99587	8.53486	24.31	28.2137	52.0847	29.4642	2.0669	0.000115955	2.72178	4.82439e-07	NA	NA
NA	OG0000073	3	6	4	g9818	677	A4IIS8	S47A1_XENTR Multidrug and toxin extrusion protein 1 OS=Xenopus tropicalis OX=8364 GN=slc47a1 PE=2 SV=1	2.82498e-67	53.08	NA	NA	NA	IPR002528 (PFAM); IPR002528 (TIGRFAM); mobidb-lite (MOBIDB_LITE); PTHR11206:SF153 (PANTHER); PTHR11206 (PANTHER); cd13132 (CDD)	P:GO:0006855; F:GO:0015297; C:GO:0016020; F:GO:0042910; P:GO:0055085	P:drug transmembrane transport; F:antiporter activity; C:membrane; F:xenobiotic transmembrane transporter activity; P:transmembrane transport	Q9SIA5	9.62966e-63	135238	7.37679e-78	26336	0	XP_005844999.1	XP_005844999.1 hypothetical protein CHLNCDRAFT_26336, partial [Chlorella variabilis]<>EFN52897.1 hypothetical protein CHLNCDRAFT_26336, partial [Chlorella variabilis]	554065	1.1e-199	140.972	91.7863	139.738	211.201	211.459	150.114	NA	NA	NA	NA	NA	NA
3	OG0000074	6	3	4	g4755	190	---NA---	---NA---	NA	NA	NA	NA	NA	no IPS match	no IPS match	no IPS match	---NA---	NA	---NA---	NA	55220	3.03616e-10	PSC68652.1	PSC68652.1 hypothetical protein C2E20_7837 [Micractinium conductrix]	554055	9.8e-26	14.8651	14.2898	22.2092	29.7315	15.7934	15.5536	1.33091	0.00941379	NA	NA	NA	NA
NA	OG0000074	6	3	4	g5522	170	---NA---	---NA---	NA	NA	NA	NA	NA	no IPS match	no IPS match	no IPS match	---NA---	NA	---NA---	NA	55220	2.81942e-86	XP_005843310.1	XP_005843310.1 hypothetical protein CHLNCDRAFT_55220 [Chlorella variabilis]<>EFN51208.1 hypothetical protein CHLNCDRAFT_55220 [Chlorella variabilis]	554065	3.9e-58	1.20676	0.877871	0.780322	0.223209	0.192017	0.931026	NA	NA	NA	NA	NA	NA
NA	OG0000074	6	3	4	g6560	314	---NA---	---NA---	NA	NA	NA	NA	NA	mobidb-lite (MOBIDB_LITE)	no GO terms	no GO terms	---NA---	NA	---NA---	NA	55220	1.86056e-10	PSC68652.1	PSC68652.1 hypothetical protein C2E20_7837 [Micractinium conductrix]	554055	1e-11	3.01691	2.24345	3.60149	1.11605	3.26429	1.31439	NA	NA	NA	NA	NA	NA
NA	OG0000075	8	1	4	g7078	265	---NA---	---NA---	NA	NA	NA	NA	NA	mobidb-lite (MOBIDB_LITE)	no GO terms	no GO terms	---NA---	NA	---NA---	NA	140294	7.45923e-117	XP_005850488.1	XP_005850488.1 expressed protein [Chlorella variabilis]<>EFN58386.1 expressed protein [Chlorella variabilis]	554065	3.5e-45	156.44	156.602	209.787	211.558	122.795	116.269	NA	NA	NA	NA	NA	NA
NA	OG0000076	0	3	10	g9001	716	---NA---	---NA---	NA	NA	NA	NA	NA	Coil (COILS); mobidb-lite (MOBIDB_LITE); mobidb-lite (MOBIDB_LITE); mobidb-lite (MOBIDB_LITE); mobidb-lite (MOBIDB_LITE); mobidb-lite (MOBIDB_LITE); mobidb-lite (MOBIDB_LITE); mobidb-lite (MOBIDB_LITE); mobidb-lite (MOBIDB_LITE); PTHR21704:SF19 (PANTHER); IPR033031 (PANTHER)	F:GO:0003682; P:GO:0010468	F:chromatin binding; P:regulation of gene expression	---NA---	NA	---NA---	NA	56560	0	XP_005852207.1	XP_005852207.1 expressed protein [Chlorella variabilis]<>EFN60105.1 expressed protein [Chlorella variabilis]	554065	2e-228	298.564	110.953	45.5588	87.7213	37.4914	94.5812	NA	NA	NA	NA	NA	NA
1	OG0000076	0	3	10	g9004	644	---NA---	---NA---	NA	NA	NA	NA	NA	mobidb-lite (MOBIDB_LITE); mobidb-lite (MOBIDB_LITE); mobidb-lite (MOBIDB_LITE); mobidb-lite (MOBIDB_LITE); mobidb-lite (MOBIDB_LITE); mobidb-lite (MOBIDB_LITE); mobidb-lite (MOBIDB_LITE)	no GO terms	no GO terms	---NA---	NA	---NA---	NA	56558	0	XP_005851871.1	XP_005851871.1 expressed protein [Chlorella variabilis]<>EFN59769.1 expressed protein [Chlorella variabilis]	554065	2.1e-266	146.951	62.1337	36.0749	31.1154	47.2362	57.8331	-1.17707	0.0377667	NA	NA	NA	NA
2	OG0000076	0	3	10	g9005	662	---NA---	---NA---	NA	NA	NA	NA	NA	Coil (COILS); mobidb-lite (MOBIDB_LITE); mobidb-lite (MOBIDB_LITE); mobidb-lite (MOBIDB_LITE); mobidb-lite (MOBIDB_LITE); mobidb-lite (MOBIDB_LITE)	no GO terms	no GO terms	---NA---	NA	---NA---	NA	56556	0	XP_005851870.1	XP_005851870.1 expressed protein [Chlorella variabilis]<>EFN59768.1 expressed protein [Chlorella variabilis]	554065	0	178.107	160.26	533.2	350.037	738.594	417.209	1.81379	0.000782038	2.27733	2.90081e-05	NA	NA
NA	OG0000077	0	11	2	g10074	347	P51588	TRYP_SARBU Trypsin OS=Sarcophaga bullata OX=7385 PE=1 SV=1	7.25595e-28	49.41	NA	NA	NA	IPR001314 (PRINTS); IPR001254 (SMART); G3DSA:2.40.10.10 (GENE3D); IPR001254 (PFAM); PTHR24276 (PANTHER); IPR018114 (PROSITE_PATTERNS); IPR033116 (PROSITE_PATTERNS); IPR001254 (PROSITE_PROFILES); IPR001254 (CDD); IPR009003 (SUPERFAMILY)	F:GO:0004252; P:GO:0006508	F:serine-type endopeptidase activity; P:proteolysis	---NA---	NA	409637	1.75095e-16	139912	0	XP_005843782.1	XP_005843782.1 hypothetical protein CHLNCDRAFT_139912 [Chlorella variabilis]<>EFN51680.1 hypothetical protein CHLNCDRAFT_139912 [Chlorella variabilis]	554065	5.9e-162	10.9157	43.4058	28.2116	11.1158	51.8447	23.7685	NA	NA	NA	NA	NA	NA
NA	OG0000077	0	11	2	g11212	493	P83748	PRS30_RAT Serine protease 30 OS=Rattus norvegicus OX=10116 GN=Prss30 PE=1 SV=1	3.13724e-17	44.48	NA	NA	NA	IPR001314 (PRINTS); IPR001254 (SMART); IPR001254 (PFAM); G3DSA:2.40.10.10 (GENE3D); PTHR24276 (PANTHER); IPR001254 (PROSITE_PROFILES); IPR001254 (CDD); IPR009003 (SUPERFAMILY)	F:GO:0004252; P:GO:0006508	F:serine-type endopeptidase activity; P:proteolysis	---NA---	NA	409637	1.34287e-10	133857	0	XP_005847587.1	XP_005847587.1 hypothetical protein CHLNCDRAFT_133857 [Chlorella variabilis]<>EFN55485.1 hypothetical protein CHLNCDRAFT_133857 [Chlorella variabilis]	554065	3.2e-286	406.24	363.39	286.258	274.414	336.99	349.135	NA	NA	NA	NA	NA	NA
NA	OG0000077	0	11	2	g11213	905	Q9Y5Z4	HEBP2_HUMAN Heme-binding protein 2 OS=Homo sapiens OX=9606 GN=HEBP2 PE=1 SV=1	1.67498e-13	46.75	9	C:GO:0009507; C:GO:0009535; C:GO:0009536; C:GO:0009579; P:GO:0015979; C:GO:0016020; P:GO:0018298; C:GO:0030089; P:GO:0055114	C:chloroplast; C:chloroplast thylakoid membrane; C:plastid; C:thylakoid; P:photosynthesis; C:membrane; P:protein-chromophore linkage; C:phycobilisome; P:oxidation-reduction process	IPR001254 (SMART); IPR011641 (SMART); IPR011256 (G3DSA:3.20.80.GENE3D); IPR006917 (PFAM); G3DSA:2.40.10.10 (GENE3D); G3DSA:2.10.50.10 (GENE3D); IPR001254 (PFAM); IPR011641 (PFAM); G3DSA:2.40.10.10 (GENE3D); PTHR46967 (PANTHER); IPR001254 (PROSITE_PROFILES); IPR011256 (SUPERFAMILY); IPR009030 (SUPERFAMILY); IPR009030 (SUPERFAMILY); IPR009030 (SUPERFAMILY); IPR009003 (SUPERFAMILY)	F:GO:0004252; P:GO:0006508	F:serine-type endopeptidase activity; P:proteolysis	Q9SHG8	1.64052e-09	423349	7.23846e-25	133858	0	XP_005847588.1	XP_005847588.1 hypothetical protein CHLNCDRAFT_133858 [Chlorella variabilis]<>EFN55486.1 hypothetical protein CHLNCDRAFT_133858 [Chlorella variabilis]	554065	3.4e-153	59.1862	28.1894	77.9121	41.5169	47.0442	32.0382	NA	NA	NA	NA	NA	NA
3	OG0000077	0	11	2	g11624	310	Q99MS4	PRS29_MOUSE Serine protease 29 OS=Mus musculus OX=10090 GN=Prss29 PE=1 SV=2	1.40879e-33	49.25	NA	NA	NA	IPR001314 (PRINTS); IPR001254 (SMART); G3DSA:2.40.10.10 (GENE3D); IPR001254 (PFAM); PTHR24276 (PANTHER); IPR033116 (PROSITE_PATTERNS); IPR018114 (PROSITE_PATTERNS); IPR001254 (PROSITE_PROFILES); IPR001254 (CDD); IPR009003 (SUPERFAMILY)	F:GO:0004252; P:GO:0006508	F:serine-type endopeptidase activity; P:proteolysis	---NA---	NA	409637	1.93783e-17	139942	1.01793e-123	XP_005843795.1	XP_005843795.1 hypothetical protein CHLNCDRAFT_139942 [Chlorella variabilis]<>EFN51693.1 hypothetical protein CHLNCDRAFT_139942 [Chlorella variabilis]	554065	5.5e-111	9.7638	4.1455	53.9022	63.9718	42.9159	34.3384	3.57482	1.7341e-09	2.97811	5.26945e-07	NA	NA
NA	OG0000077	0	11	2	g3832	434	Q7SIG2	CTR1_SOLIN Chymotrypsin-1 OS=Solenopsis invicta OX=13686 PE=1 SV=1	2.35397e-11	45.02	NA	NA	NA	IPR001314 (PRINTS); IPR001254 (SMART); G3DSA:2.40.10.10 (GENE3D); IPR001254 (PFAM); PTHR24276 (PANTHER); IPR033116 (PROSITE_PATTERNS); IPR001254 (PROSITE_PROFILES); IPR009003 (SUPERFAMILY)	F:GO:0004252; P:GO:0006508	F:serine-type endopeptidase activity; P:proteolysis	---NA---	NA	---NA---	NA	137321	0	XP_005845050.1	XP_005845050.1 hypothetical protein CHLNCDRAFT_137321 [Chlorella variabilis]<>EFN52948.1 hypothetical protein CHLNCDRAFT_137321 [Chlorella variabilis]	554065	7.5e-215	9.43469	13.3631	11.0446	9.19622	3.84034	6.35288	NA	NA	NA	NA	NA	NA
NA	OG0000077	0	11	2	g3833	404	P24664	TRYP_SACER Trypsin OS=Saccharopolyspora erythraea OX=1836 PE=1 SV=1	1.84724e-12	43.46	NA	NA	NA	IPR001314 (PRINTS); IPR001254 (SMART); G3DSA:2.40.10.10 (GENE3D); IPR001254 (PFAM); G3DSA:2.40.10.10 (GENE3D); PTHR24276 (PANTHER); IPR018114 (PROSITE_PATTERNS); IPR033116 (PROSITE_PATTERNS); IPR001254 (PROSITE_PROFILES); IPR001254 (CDD); IPR009003 (SUPERFAMILY)	F:GO:0004252; P:GO:0006508	F:serine-type endopeptidase activity; P:proteolysis	---NA---	NA	143218	1.83883e-08	137322	0	XP_005845051.1	XP_005845051.1 hypothetical protein CHLNCDRAFT_137322 [Chlorella variabilis]<>EFN52949.1 hypothetical protein CHLNCDRAFT_137322 [Chlorella variabilis]	554065	3.2e-151	31.9792	44.6739	23.9499	12.8569	15.2654	14.513	NA	NA	NA	NA	NA	NA
NA	OG0000077	0	11	2	g3835	336	P83748	PRS30_RAT Serine protease 30 OS=Rattus norvegicus OX=10116 GN=Prss30 PE=1 SV=1	3.48848e-20	43.62	NA	NA	NA	IPR001314 (PRINTS); IPR001254 (SMART); IPR001254 (PFAM); G3DSA:2.40.10.10 (GENE3D); G3DSA:2.40.10.10 (GENE3D); PTHR24276 (PANTHER); IPR033116 (PROSITE_PATTERNS); IPR001254 (PROSITE_PROFILES); IPR001254 (CDD); IPR009003 (SUPERFAMILY)	F:GO:0004252; P:GO:0006508	F:serine-type endopeptidase activity; P:proteolysis	---NA---	NA	409637	4.36771e-06	137324	0	XP_005845052.1	XP_005845052.1 hypothetical protein CHLNCDRAFT_137324 [Chlorella variabilis]<>EFN52950.1 hypothetical protein CHLNCDRAFT_137324 [Chlorella variabilis]	554065	2.1e-164	20.4053	25.9947	26.771	10.5801	20.7379	19.3325	NA	NA	NA	NA	NA	NA
1	OG0000077	0	11	2	g3836	382	P18292	THRB_RAT Prothrombin OS=Rattus norvegicus OX=10116 GN=F2 PE=1 SV=1	2.1518e-12	37.7	NA	NA	NA	IPR001314 (PRINTS); IPR001254 (SMART); G3DSA:2.40.10.10 (GENE3D); G3DSA:2.40.10.10 (GENE3D); IPR001254 (PFAM); PTHR24276 (PANTHER); IPR033116 (PROSITE_PATTERNS); IPR001254 (PROSITE_PROFILES); IPR009003 (SUPERFAMILY)	F:GO:0004252; P:GO:0006508	F:serine-type endopeptidase activity; P:proteolysis	---NA---	NA	---NA---	NA	137325	2.50205e-107	XP_005845053.1	XP_005845053.1 expressed protein [Chlorella variabilis]<>EFN52951.1 expressed protein [Chlorella variabilis]	554065	1.2e-83	260.716	411.624	40.2766	124.908	21.89	69.3888	NA	NA	-2.40453	0.0110897	NA	NA
NA	OG0000077	0	11	2	g4481	399	P26262	KLKB1_MOUSE Plasma kallikrein OS=Mus musculus OX=10090 GN=Klkb1 PE=1 SV=2	5.20997e-13	47.85	NA	NA	NA	IPR001254 (SMART); G3DSA:2.40.10.10 (GENE3D); G3DSA:2.40.10.10 (GENE3D); IPR001254 (PFAM); PTHR24276 (PANTHER); IPR033116 (PROSITE_PATTERNS); IPR001254 (PROSITE_PROFILES); IPR009003 (SUPERFAMILY)	F:GO:0004252; P:GO:0006508	F:serine-type endopeptidase activity; P:proteolysis	---NA---	NA	---NA---	NA	57555	0	XP_005848782.1	XP_005848782.1 hypothetical protein CHLNCDRAFT_57555 [Chlorella variabilis]<>EFN56680.1 hypothetical protein CHLNCDRAFT_57555 [Chlorella variabilis]	554065	3.4e-222	660.538	394.554	410.509	641.459	962.726	682.551	NA	NA	NA	NA	NA	NA
2	OG0000077	0	11	2	g5435	514	P83748	PRS30_RAT Serine protease 30 OS=Rattus norvegicus OX=10116 GN=Prss30 PE=1 SV=1	2.34271e-20	43.16	NA	NA	NA	IPR001314 (PRINTS); IPR001254 (SMART); G3DSA:2.40.10.10 (GENE3D); IPR001254 (PFAM); G3DSA:2.40.10.10 (GENE3D); PTHR24276 (PANTHER); IPR033116 (PROSITE_PATTERNS); IPR018114 (PROSITE_PATTERNS); IPR001254 (PROSITE_PROFILES); IPR001254 (CDD); IPR009003 (SUPERFAMILY)	F:GO:0004252; P:GO:0006508	F:serine-type endopeptidase activity; P:proteolysis	---NA---	NA	143218	1.739e-08	137544	0	XP_005851060.1	XP_005851060.1 hypothetical protein CHLNCDRAFT_137544 [Chlorella variabilis]<>EFN58958.1 hypothetical protein CHLNCDRAFT_137544 [Chlorella variabilis]	554065	1.1e-270	7.29543	8.43731	23.5897	27.6333	21.6019	30.1762	2.1859	1.13312e-05	2.20629	1.17304e-05	NA	NA
NA	OG0000077	0	11	2	g7721	961	O97366	PPAF1_HOLDI Phenoloxidase-activating factor 1 OS=Holotrichia diomphalia OX=33394 GN=PPAF1 PE=1 SV=1	1.78699e-26	45.04	NA	NA	NA	IPR001314 (PRINTS); IPR001254 (SMART); IPR001254 (PFAM); G3DSA:2.40.10.10 (GENE3D); mobidb-lite (MOBIDB_LITE); mobidb-lite (MOBIDB_LITE); PTHR24276 (PANTHER); IPR018114 (PROSITE_PATTERNS); IPR033116 (PROSITE_PATTERNS); IPR001254 (PROSITE_PROFILES); IPR001254 (CDD); IPR009003 (SUPERFAMILY)	F:GO:0004252; P:GO:0006508	F:serine-type endopeptidase activity; P:proteolysis	---NA---	NA	409637	6.40723e-11	53640	0	XP_005845807.1	XP_005845807.1 hypothetical protein CHLNCDRAFT_53640 [Chlorella variabilis]<>EFN53705.1 hypothetical protein CHLNCDRAFT_53640 [Chlorella variabilis]	554065	1.5e-303	76.8488	90.8596	92.7382	92.8104	70.1823	70.7579	NA	NA	NA	NA	NA	NA
NA	OG0000078	6	4	2	g4385	236	O26317	Y215_METTH Uncharacterized protein MTH_215 OS=Methanothermobacter thermautotrophicus (strain ATCC 29096 / DSM 1053 / JCM 10044 / NBRC 100330 / Delta H) OX=187420 GN=MTH_215 PE=3 SV=1	3.60332e-32	52.66	NA	NA	NA	IPR000791 (PFAM); PTHR30178 (PANTHER); IPR000791 (PROSITE_PATTERNS)	C:GO:0016021	C:integral component of membrane	---NA---	NA	319722	1.04971e-21	144274	3.49644e-174	XP_005848887.1	XP_005848887.1 hypothetical protein CHLNCDRAFT_144274 [Chlorella variabilis]<>EFN56785.1 hypothetical protein CHLNCDRAFT_144274 [Chlorella variabilis]	554065	1.3e-131	47.3929	17.3136	0.12005	13.0354	0.0480043	15.0059	NA	NA	NA	NA	NA	NA
NA	OG0000078	6	4	2	g4387	236	O26317	Y215_METTH Uncharacterized protein MTH_215 OS=Methanothermobacter thermautotrophicus (strain ATCC 29096 / DSM 1053 / JCM 10044 / NBRC 100330 / Delta H) OX=187420 GN=MTH_215 PE=3 SV=1	3.48946e-32	52.17	NA	NA	NA	IPR000791 (PFAM); PTHR30178 (PANTHER); IPR000791 (PROSITE_PATTERNS)	C:GO:0016021	C:integral component of membrane	---NA---	NA	319722	4.05206e-22	144272	1.03753e-172	XP_005848680.1	XP_005848680.1 hypothetical protein CHLNCDRAFT_144272 [Chlorella variabilis]<>EFN56578.1 hypothetical protein CHLNCDRAFT_144272 [Chlorella variabilis]	554065	1.8e-130	37.3548	22.6296	0.360149	11.2497	0.576052	13.9654	NA	NA	NA	NA	NA	NA
NA	OG0000078	6	4	2	g8232	240	O26317	Y215_METTH Uncharacterized protein MTH_215 OS=Methanothermobacter thermautotrophicus (strain ATCC 29096 / DSM 1053 / JCM 10044 / NBRC 100330 / Delta H) OX=187420 GN=MTH_215 PE=3 SV=1	4.75001e-33	53.62	NA	NA	NA	IPR000791 (PFAM); PTHR30178 (PANTHER); IPR000791 (PROSITE_PATTERNS)	C:GO:0016021	C:integral component of membrane	---NA---	NA	319722	1.08231e-20	53601	7.28414e-176	XP_005845896.1	XP_005845896.1 hypothetical protein CHLNCDRAFT_53601 [Chlorella variabilis]<>EFN53794.1 hypothetical protein CHLNCDRAFT_53601 [Chlorella variabilis]	554065	2.6e-132	20.0761	24.9705	0.720297	3.3035	0.288026	4.76466	NA	NA	NA	NA	NA	NA
1	OG0000078	6	4	2	g8249	240	O26317	Y215_METTH Uncharacterized protein MTH_215 OS=Methanothermobacter thermautotrophicus (strain ATCC 29096 / DSM 1053 / JCM 10044 / NBRC 100330 / Delta H) OX=187420 GN=MTH_215 PE=3 SV=1	3.83427e-33	53.62	NA	NA	NA	IPR000791 (PFAM); PTHR30178 (PANTHER); IPR000791 (PROSITE_PATTERNS)	C:GO:0016021	C:integral component of membrane	---NA---	NA	319722	1.18859e-20	53601	2.80836e-175	XP_005845896.1	XP_005845896.1 hypothetical protein CHLNCDRAFT_53601 [Chlorella variabilis]<>EFN53794.1 hypothetical protein CHLNCDRAFT_53601 [Chlorella variabilis]	554065	5.8e-132	149.529	124.804	5.76238	16.4728	15.6014	40.8008	-3.06226	0.000164463	-1.79967	0.0269048	NA	NA
3	OG0000079	5	4	3	g11579	299	---NA---	---NA---	NA	NA	NA	NA	NA	IPR002044 (SMART); IPR002044 (PFAM); IPR013783 (G3DSA:2.60.40.GENE3D); mobidb-lite (MOBIDB_LITE); mobidb-lite (MOBIDB_LITE); mobidb-lite (MOBIDB_LITE); mobidb-lite (MOBIDB_LITE); PTHR15048 (PANTHER); PTHR15048:SF0 (PANTHER); IPR002044 (PROSITE_PROFILES); IPR013784 (SUPERFAMILY)	F:GO:0030246; F:GO:2001070	F:carbohydrate binding; F:starch binding	Q9LFB0	3.31151e-06	377743	7.21214e-11	58799	0	XP_005844692.1	XP_005844692.1 hypothetical protein CHLNCDRAFT_58799 [Chlorella variabilis]<>EFN52590.1 hypothetical protein CHLNCDRAFT_58799 [Chlorella variabilis]	554065	2.4e-127	34.7767	17.655	26.9511	507.132	11.185	130.453	3.98732	0.0416835	NA	NA	NA	NA
NA	OG0000079	5	4	3	g4371	440	---NA---	---NA---	NA	NA	NA	NA	NA	Coil (COILS); Coil (COILS); IPR002044 (SMART); IPR002044 (PFAM); IPR013783 (G3DSA:2.60.40.GENE3D); mobidb-lite (MOBIDB_LITE); mobidb-lite (MOBIDB_LITE); mobidb-lite (MOBIDB_LITE); mobidb-lite (MOBIDB_LITE); PTHR15048:SF0 (PANTHER); PTHR15048 (PANTHER); IPR002044 (PROSITE_PROFILES); cd05467 (CDD); IPR013784 (SUPERFAMILY)	F:GO:0030246; F:GO:2001070	F:carbohydrate binding; F:starch binding	Q9LFB0	2.82216e-10	423949	2.47786e-15	52636	0	XP_005847512.1	XP_005847512.1 hypothetical protein CHLNCDRAFT_52636 [Chlorella variabilis]<>EFN55410.1 hypothetical protein CHLNCDRAFT_52636 [Chlorella variabilis]	554065	1.1e-144	104.33	120.122	21.4889	453.74	31.4908	192.175	NA	NA	NA	NA	NA	NA
2	OG0000079	5	4	3	g8094	658	P36914	AMYG_ASPOR Glucoamylase OS=Aspergillus oryzae (strain ATCC 42149 / RIB 40) OX=510516 GN=glaA PE=2 SV=2	2.8222e-06	51.25	NA	NA	NA	Coil (COILS); IPR002044 (SMART); IPR013783 (G3DSA:2.60.40.GENE3D); IPR002044 (PFAM); mobidb-lite (MOBIDB_LITE); mobidb-lite (MOBIDB_LITE); mobidb-lite (MOBIDB_LITE); mobidb-lite (MOBIDB_LITE); mobidb-lite (MOBIDB_LITE); mobidb-lite (MOBIDB_LITE); PTHR15048:SF0 (PANTHER); PTHR15048 (PANTHER); IPR002044 (PROSITE_PROFILES); cd05467 (CDD); IPR013784 (SUPERFAMILY)	F:GO:0030246; F:GO:2001070	F:carbohydrate binding; F:starch binding	Q6ZY51	3.57691e-07	377743	5.88361e-12	135268	0	XP_005846770.1	XP_005846770.1 hypothetical protein CHLNCDRAFT_135268 [Chlorella variabilis]<>EFN54668.1 hypothetical protein CHLNCDRAFT_135268 [Chlorella variabilis]	554065	1.7e-218	1.865	2.43853	3.54146	4.01777	3.79234	5.03849	1.28873	0.0448761	1.52065	0.0167622	NA	NA
3	OG0000079	5	4	3	g8568	669	Q6ZY51	PWD_ARATH Phosphoglucan, water dikinase, chloroplastic OS=Arabidopsis thaliana OX=3702 GN=GWD3 PE=1 SV=1	1.41274e-11	54.55	NA	NA	NA	IPR002044 (SMART); IPR002044 (PFAM); IPR013783 (G3DSA:2.60.40.GENE3D); mobidb-lite (MOBIDB_LITE); mobidb-lite (MOBIDB_LITE); mobidb-lite (MOBIDB_LITE); PTHR15048 (PANTHER); PTHR15048:SF0 (PANTHER); IPR002044 (PROSITE_PROFILES); cd05467 (CDD); IPR013784 (SUPERFAMILY)	F:GO:0030246; F:GO:2001070	F:carbohydrate binding; F:starch binding	Q6ZY51	7.81378e-13	422360	8.62255e-15	54374	0	XP_005844815.1	XP_005844815.1 hypothetical protein CHLNCDRAFT_54374 [Chlorella variabilis]<>EFN52713.1 hypothetical protein CHLNCDRAFT_54374 [Chlorella variabilis]	554065	5.1e-178	26.4939	34.3833	75.9913	61.2486	29.8587	52.8494	1.61958	0.00100153	NA	NA	NA	NA
2	OG0000080	7	2	3	g10469	415	Q8H3C9	ILL7_ORYSJ IAA-amino acid hydrolase ILR1-like 7 OS=Oryza sativa subsp. japonica OX=39947 GN=ILL7 PE=2 SV=1	3.9092e-123	65.57	NA	NA	NA	G3DSA:3.30.70.360 (GENE3D); IPR002933 (PFAM); IPR017439 (TIGRFAM); IPR017439 (PIRSF); IPR011650 (PFAM); G3DSA:3.40.630.10 (GENE3D); PTHR11014 (PANTHER); cd08017 (CDD); IPR036264 (SUPERFAMILY); SSF53187 (SUPERFAMILY)	F:GO:0016787	F:hydrolase activity	O81641	2.09866e-121	347881	1.19418e-144	18222	0	XP_005851917.1	XP_005851917.1 hypothetical protein CHLNCDRAFT_18222 [Chlorella variabilis]<>EFN59815.1 hypothetical protein CHLNCDRAFT_18222 [Chlorella variabilis]	554065	1.7e-219	21.0086	17.5086	11.5848	66.2485	53.4768	53.6161	NA	NA	1.97162	0.046406	NA	NA
NA	OG0000080	7	2	3	g568	426	Q8S9S4	ILL1_ORYSJ IAA-amino acid hydrolase ILR1-like 1 OS=Oryza sativa subsp. japonica OX=39947 GN=ILL1 PE=2 SV=1	6.81889e-110	61.19	NA	NA	NA	Coil (COILS); G3DSA:3.40.630.10 (GENE3D); IPR017439 (TIGRFAM); IPR002933 (PFAM); IPR011650 (PFAM); IPR017439 (PIRSF); G3DSA:3.30.70.360 (GENE3D); PTHR11014 (PANTHER); cd08017 (CDD); IPR036264 (SUPERFAMILY); SSF53187 (SUPERFAMILY)	F:GO:0016787	F:hydrolase activity	P54969	3.3209e-109	425943	5.14381e-116	22838	0	XP_005848125.1	XP_005848125.1 hypothetical protein CHLNCDRAFT_22838 [Chlorella variabilis]<>EFN56023.1 hypothetical protein CHLNCDRAFT_22838 [Chlorella variabilis]	554065	1.9e-202	16.5107	14.9726	18.3075	6.47307	8.54477	6.29811	NA	NA	NA	NA	NA	NA
3	OG0000081	7	3	2	g3953	654	Q9Z1J2	NEK4_MOUSE Serine/threonine-protein kinase Nek4 OS=Mus musculus OX=10090 GN=Nek4 PE=1 SV=1	1.319e-54	61.28	NA	NA	NA	IPR000719 (SMART); G3DSA:3.30.200.20 (GENE3D); G3DSA:1.10.510.10 (GENE3D); IPR000719 (PFAM); mobidb-lite (MOBIDB_LITE); mobidb-lite (MOBIDB_LITE); mobidb-lite (MOBIDB_LITE); PTHR44899:SF3 (PANTHER); PTHR44899 (PANTHER); IPR008271 (PROSITE_PATTERNS); IPR017441 (PROSITE_PATTERNS); IPR000719 (PROSITE_PROFILES); IPR011009 (SUPERFAMILY)	F:GO:0004672; F:GO:0005524; P:GO:0006468	F:protein kinase activity; F:ATP binding; P:protein phosphorylation	Q9LT35	7.09545e-49	132979	8.41496e-96	11072	5.09404e-179	XP_005849160.1	XP_005849160.1 hypothetical protein CHLNCDRAFT_11072, partial [Chlorella variabilis]<>EFN57058.1 hypothetical protein CHLNCDRAFT_11072, partial [Chlorella variabilis]	554065	4e-135	58.7474	70.4735	105.764	251.869	70.8064	93.1573	2.01477	0.00193523	NA	NA	NA	NA
NA	OG0000081	7	3	2	g8942	654	Q6P3R8	NEK5_HUMAN Serine/threonine-protein kinase Nek5 OS=Homo sapiens OX=9606 GN=NEK5 PE=2 SV=1	2.14135e-58	62.27	NA	NA	NA	IPR000719 (SMART); G3DSA:1.10.510.10 (GENE3D); IPR000719 (PFAM); mobidb-lite (MOBIDB_LITE); mobidb-lite (MOBIDB_LITE); mobidb-lite (MOBIDB_LITE); PTHR44899 (PANTHER); PTHR44899:SF3 (PANTHER); IPR008271 (PROSITE_PATTERNS); IPR017441 (PROSITE_PATTERNS); IPR000719 (PROSITE_PROFILES); cd08215 (CDD); IPR011009 (SUPERFAMILY)	F:GO:0004672; F:GO:0005524; P:GO:0006468	F:protein kinase activity; F:ATP binding; P:protein phosphorylation	Q9CAU7	4.83677e-49	195107	1.97637e-75	11527	6.31264e-136	PRW51136.1	PRW51136.1 hypothetical protein C2E21_5509 [Chlorella sorokiniana]	3076	1.9e-145	5.75955	1.12172	0.0600248	3.66063	0.0960086	3.77887	NA	NA	NA	NA	NA	NA
NA	OG0000081	7	3	2	g8943	761	Q9Z1J2	NEK4_MOUSE Serine/threonine-protein kinase Nek4 OS=Mus musculus OX=10090 GN=Nek4 PE=1 SV=1	1.73844e-49	59.06	NA	NA	NA	IPR000719 (SMART); G3DSA:1.10.510.10 (GENE3D); IPR000719 (PFAM); mobidb-lite (MOBIDB_LITE); mobidb-lite (MOBIDB_LITE); mobidb-lite (MOBIDB_LITE); mobidb-lite (MOBIDB_LITE); mobidb-lite (MOBIDB_LITE); mobidb-lite (MOBIDB_LITE); mobidb-lite (MOBIDB_LITE); mobidb-lite (MOBIDB_LITE); PTHR44899 (PANTHER); PTHR44899:SF3 (PANTHER); IPR008271 (PROSITE_PATTERNS); IPR017441 (PROSITE_PATTERNS); IPR000719 (P…	F:GO:0004672; F:GO:0005524; P:GO:0006468	F:protein kinase activity; F:ATP binding; P:protein phosphorylation	Q9LT35	8.10828e-39	195107	5.12903e-73	144329	0	XP_005848697.1	XP_005848697.1 hypothetical protein CHLNCDRAFT_144329 [Chlorella variabilis]<>EFN56595.1 hypothetical protein CHLNCDRAFT_144329 [Chlorella variabilis]	554065	9.5e-213	83.8151	26.141	2.76114	105.489	10.993	173.937	NA	NA	NA	NA	NA	NA
NA	OG0000082	9	3	0	g10615	107	---NA---	---NA---	NA	NA	NA	NA	NA	mobidb-lite (MOBIDB_LITE)	no GO terms	no GO terms	---NA---	NA	---NA---	NA	---NA---	NA	NA	NA	NA	NA	19.6922	17.1185	21.849	19.5978	17.3296	14.2392	NA	NA	NA	NA	NA	NA
2	OG0000082	9	3	0	g7731	213	---NA---	---NA---	NA	NA	NA	NA	NA	mobidb-lite (MOBIDB_LITE); mobidb-lite (MOBIDB_LITE)	no GO terms	no GO terms	---NA---	NA	---NA---	NA	143572	7.4872e-150	XP_005849079.1	XP_005849079.1 expressed protein [Chlorella variabilis]<>EFN56977.1 expressed protein [Chlorella variabilis]	554065	5.7e-83	40.2071	64.2309	71.3094	88.3909	80.5992	84.2852	1.1003	0.0368439	1.15068	0.029245	NA	NA
1	OG0000082	9	3	0	g7790	398	---NA---	---NA---	NA	NA	NA	NA	NA	mobidb-lite (MOBIDB_LITE); mobidb-lite (MOBIDB_LITE); mobidb-lite (MOBIDB_LITE)	no GO terms	no GO terms	---NA---	NA	---NA---	NA	143572	2.72498e-34	XP_005849079.1	XP_005849079.1 expressed protein [Chlorella variabilis]<>EFN56977.1 expressed protein [Chlorella variabilis]	554065	1.1e-23	75.0387	52.3796	30.1925	13.0801	19.9218	26.7259	-1.1649	0.0290602	NA	NA	NA	NA
3	OG0000083	2	2	8	g10914	1989	---NA---	---NA---	NA	NA	NA	NA	NA	Coil (COILS); IPR018849 (PFAM); mobidb-lite (MOBIDB_LITE); mobidb-lite (MOBIDB_LITE); mobidb-lite (MOBIDB_LITE); mobidb-lite (MOBIDB_LITE); mobidb-lite (MOBIDB_LITE); mobidb-lite (MOBIDB_LITE); mobidb-lite (MOBIDB_LITE); mobidb-lite (MOBIDB_LITE); mobidb-lite (MOBIDB_LITE); mobidb-lite (MOBIDB_LITE); mobidb-lite (MOBIDB_LITE); mobidb-lite (MOBIDB_LITE); mobidb-lite (MOBIDB_LITE); PTHR15682 (PANTH…	no GO terms	no GO terms	---NA---	NA	---NA---	NA	145231	0	XP_005847882.1	XP_005847882.1 hypothetical protein CHLNCDRAFT_145231 [Chlorella variabilis]<>EFN55780.1 hypothetical protein CHLNCDRAFT_145231 [Chlorella variabilis]	554065	0	51.7811	74.7653	162.967	136.515	159.662	95.7313	1.69301	0.00125391	1.51431	0.00429283	NA	NA
1	OG0000083	2	2	8	g402	483	P73245	Y1917_SYNY3 Oxygen-independent coproporphyrinogen-III oxidase-like protein sll1917 OS=Synechocystis sp. (strain PCC 6803 / Kazusa) OX=1111708 GN=sll1917 PE=2 SV=1	3.51119e-114	60.96	NA	NA	NA	IPR006638 (SMART); IPR007197 (PFAM); IPR023404 (G3DSA:3.80.30.GENE3D); IPR004559 (TIGRFAM); IPR007197 (PTHR13932:PANTHER); IPR034505 (PANTHER); cd01335 (CDD); SSF102114 (SUPERFAMILY)	F:GO:0003824; F:GO:0004109; C:GO:0005737; P:GO:0006779; F:GO:0051536; P:GO:0055114	F:catalytic activity; F:coproporphyrinogen oxidase activity; C:cytoplasm; P:porphyrin-containing compound biosynthetic process; F:iron-sulfur cluster binding; P:oxidation-reduction process	Q9FMJ4	2.30759e-120	---NA---	NA	138795	0	XP_005844468.1	XP_005844468.1 hypothetical protein CHLNCDRAFT_138795 [Chlorella variabilis]<>EFN52366.1 hypothetical protein CHLNCDRAFT_138795 [Chlorella variabilis]	554065	2.3e-228	23.861	26.3849	11.7048	5.89273	8.20874	8.65306	-1.10991	0.0331509	-1.08064	0.0395115	NA	NA
NA	OG0000084	4	4	4	g10940	495	Q8VYN6	PFKA5_ARATH ATP-dependent 6-phosphofructokinase 5, chloroplastic OS=Arabidopsis thaliana OX=3702 GN=PFK5 PE=1 SV=1	2.27632e-130	65.42	NA	NA	NA	IPR022953 (PRINTS); IPR012004 (PIRSF); G3DSA:3.40.50.450 (GENE3D); IPR000023 (PFAM); mobidb-lite (MOBIDB_LITE); PTHR45770 (PANTHER); PTHR45770:SF11 (PANTHER); IPR035966 (SUPERFAMILY)	F:GO:0003872; F:GO:0005524; P:GO:0006002; P:GO:0006096	F:6-phosphofructokinase activity; F:ATP binding; P:fructose 6-phosphate metabolic process; P:glycolytic process	Q8VYN6	1.25902e-131	196624	0	145205	0	PSC70696.1	PSC70696.1 phosphofructokinase family [Micractinium conductrix]	554055	9.1e-241	75.9712	108.515	81.7537	41.6062	60.4374	62.3787	NA	NA	NA	NA	NA	NA
1	OG0000084	4	4	4	g2715	469	Q8VYN6	PFKA5_ARATH ATP-dependent 6-phosphofructokinase 5, chloroplastic OS=Arabidopsis thaliana OX=3702 GN=PFK5 PE=1 SV=1	3.55833e-140	66.52	NA	NA	NA	IPR022953 (PRINTS); G3DSA:3.40.50.450 (GENE3D); IPR000023 (PFAM); IPR012004 (PIRSF); PTHR45770 (PANTHER); PTHR45770:SF11 (PANTHER); IPR035966 (SUPERFAMILY)	F:GO:0003872; F:GO:0005524; P:GO:0006002; P:GO:0006096	F:6-phosphofructokinase activity; F:ATP binding; P:fructose 6-phosphate metabolic process; P:glycolytic process	Q8VYN6	1.96809e-141	196430	0	29926	0	XP_005850730.1	XP_005850730.1 hypothetical protein CHLNCDRAFT_29926 [Chlorella variabilis]<>EFN58628.1 hypothetical protein CHLNCDRAFT_29926 [Chlorella variabilis]	554065	1.8e-267	66.9205	65.3038	33.1337	13.1694	15.9374	24.59	-1.13015	0.0387273	-1.21711	0.0260021	NA	NA
1	OG0000084	4	4	4	g6769	457	Q8VYN6	PFKA5_ARATH ATP-dependent 6-phosphofructokinase 5, chloroplastic OS=Arabidopsis thaliana OX=3702 GN=PFK5 PE=1 SV=1	5.7746e-145	71.35	NA	NA	NA	IPR022953 (PRINTS); IPR012004 (PIRSF); G3DSA:3.40.50.450 (GENE3D); IPR000023 (PFAM); PTHR45770:SF11 (PANTHER); PTHR45770 (PANTHER); IPR035966 (SUPERFAMILY)	F:GO:0003872; F:GO:0005524; P:GO:0006002; P:GO:0006096	F:6-phosphofructokinase activity; F:ATP binding; P:fructose 6-phosphate metabolic process; P:glycolytic process	Q8VYN6	3.1939e-146	196430	0	29926	5.73482e-179	PRW61573.1	PRW61573.1 phosphofructokinase family [Chlorella sorokiniana]	3076	1.4e-208	103.727	144.166	48.9202	25.4459	40.4196	22.3446	-1.3318	0.0151384	-1.47844	0.00691914	NA	NA
NA	OG0000084	4	4	4	g7887	578	Q8VYN6	PFKA5_ARATH ATP-dependent 6-phosphofructokinase 5, chloroplastic OS=Arabidopsis thaliana OX=3702 GN=PFK5 PE=1 SV=1	4.4763e-112	61.26	NA	NA	NA	IPR022953 (PRINTS); IPR000023 (PFAM); IPR012004 (PIRSF); G3DSA:3.40.50.460 (GENE3D); G3DSA:3.40.50.450 (GENE3D); mobidb-lite (MOBIDB_LITE); PTHR45770 (PANTHER); PTHR45770:SF11 (PANTHER); IPR035966 (SUPERFAMILY)	F:GO:0003872; F:GO:0005524; P:GO:0006002; P:GO:0006096	F:6-phosphofructokinase activity; F:ATP binding; P:fructose 6-phosphate metabolic process; P:glycolytic process	Q8VYN6	2.47582e-113	196430	6.49183e-165	29590	0	XP_005851279.1	XP_005851279.1 hypothetical protein CHLNCDRAFT_29590 [Chlorella variabilis]<>EFN59177.1 hypothetical protein CHLNCDRAFT_29590 [Chlorella variabilis]	554065	2.6e-210	73.5577	73.7899	99.401	81.7393	73.1106	68.5125	NA	NA	NA	NA	NA	NA
2	OG0000085	5	6	1	g11629	375	---NA---	---NA---	NA	NA	NA	NA	NA	mobidb-lite (MOBIDB_LITE); mobidb-lite (MOBIDB_LITE); mobidb-lite (MOBIDB_LITE); mobidb-lite (MOBIDB_LITE); mobidb-lite (MOBIDB_LITE)	no GO terms	no GO terms	---NA---	NA	---NA---	NA	143169	1.79206e-26	XP_005849643.1	XP_005849643.1 hypothetical protein CHLNCDRAFT_143169 [Chlorella variabilis]<>EFN57541.1 hypothetical protein CHLNCDRAFT_143169 [Chlorella variabilis]	554065	1.1e-15	2.13926	1.26804	5.22215	28.6601	23.6661	22.8375	3.9112	0.000121817	4.26531	3.90928e-05	NA	NA
NA	OG0000085	5	6	1	g7456	495	---NA---	---NA---	NA	NA	NA	NA	NA	mobidb-lite (MOBIDB_LITE); mobidb-lite (MOBIDB_LITE); mobidb-lite (MOBIDB_LITE); mobidb-lite (MOBIDB_LITE); mobidb-lite (MOBIDB_LITE); mobidb-lite (MOBIDB_LITE)	no GO terms	no GO terms	---NA---	NA	---NA---	NA	143169	2.26915e-178	XP_005849643.1	XP_005849643.1 hypothetical protein CHLNCDRAFT_143169 [Chlorella variabilis]<>EFN57541.1 hypothetical protein CHLNCDRAFT_143169 [Chlorella variabilis]	554065	7.4e-166	56.9921	53.5989	20.5285	33.3921	20.7859	34.0098	NA	NA	NA	NA	NA	NA
1	OG0000085	5	6	1	g9421	791	---NA---	---NA---	NA	NA	NA	NA	NA	Coil (COILS); mobidb-lite (MOBIDB_LITE); mobidb-lite (MOBIDB_LITE); mobidb-lite (MOBIDB_LITE); mobidb-lite (MOBIDB_LITE); mobidb-lite (MOBIDB_LITE); mobidb-lite (MOBIDB_LITE); mobidb-lite (MOBIDB_LITE); mobidb-lite (MOBIDB_LITE); mobidb-lite (MOBIDB_LITE); mobidb-lite (MOBIDB_LITE); mobidb-lite (MOBIDB_LITE); mobidb-lite (MOBIDB_LITE); mobidb-lite (MOBIDB_LITE); PTHR14445 (PANTHER)	no GO terms	no GO terms	---NA---	NA	---NA---	NA	144738	0	XP_005848223.1	XP_005848223.1 hypothetical protein CHLNCDRAFT_144738 [Chlorella variabilis]<>EFN56121.1 hypothetical protein CHLNCDRAFT_144738 [Chlorella variabilis]	554065	8.1e-191	152.107	113.977	22.2092	40.9812	34.0351	43.9225	-1.54541	0.00736263	-1.27769	0.0292641	NA	NA
NA	OG0000085	5	6	1	g9742	245	---NA---	---NA---	NA	NA	NA	NA	NA	mobidb-lite (MOBIDB_LITE)	no GO terms	no GO terms	---NA---	NA	---NA---	NA	140988	2.94282e-46	XP_005843520.1	XP_005843520.1 expressed protein [Chlorella variabilis]<>EFN51418.1 expressed protein [Chlorella variabilis]	554065	4.1e-32	0.329117	0.0487706	0	0.312493	0.240022	0.109532	NA	NA	NA	NA	NA	NA
NA	OG0000085	5	6	1	g9743	500	---NA---	---NA---	NA	NA	NA	NA	NA	mobidb-lite (MOBIDB_LITE); mobidb-lite (MOBIDB_LITE); mobidb-lite (MOBIDB_LITE); mobidb-lite (MOBIDB_LITE); mobidb-lite (MOBIDB_LITE)	no GO terms	no GO terms	---NA---	NA	---NA---	NA	140988	3.79015e-48	XP_005843520.1	XP_005843520.1 expressed protein [Chlorella variabilis]<>EFN51418.1 expressed protein [Chlorella variabilis]	554065	2.7e-35	55.9499	32.7251	34.1541	25.5351	52.0367	24.3162	NA	NA	NA	NA	NA	NA
1	OG0000085	5	6	1	g9878	172	---NA---	---NA---	NA	NA	NA	NA	NA	mobidb-lite (MOBIDB_LITE); mobidb-lite (MOBIDB_LITE); mobidb-lite (MOBIDB_LITE)	no GO terms	no GO terms	---NA---	NA	---NA---	NA	139338	1.02951e-33	PSC73231.1	PSC73231.1 hypothetical protein C2E20_3461 [Micractinium conductrix]	554055	1.9e-15	11.6288	14.4361	6.12252	4.91061	3.88835	4.16223	NA	NA	-1.20098	0.0284095	NA	NA
NA	OG0000086	6	3	3	g9902	728	---NA---	---NA---	NA	NA	NA	NA	NA	IPR019378 (PFAM); IPR029044 (G3DSA:3.90.550.GENE3D); mobidb-lite (MOBIDB_LITE); cd11296 (CDD); IPR029044 (SUPERFAMILY)	no GO terms	no GO terms	---NA---	NA	415208	2.49098e-165	59016	0	XP_005844275.1	XP_005844275.1 hypothetical protein CHLNCDRAFT_59016 [Chlorella variabilis]<>EFN52173.1 hypothetical protein CHLNCDRAFT_59016 [Chlorella variabilis]	554065	0	11.19	28.8234	11.7649	13.7943	14.6413	22.4541	NA	NA	NA	NA	NA	NA
NA	OG0000086	6	3	3	g9906	690	---NA---	---NA---	NA	NA	NA	NA	NA	IPR019378 (PFAM); IPR029044 (G3DSA:3.90.550.GENE3D); mobidb-lite (MOBIDB_LITE); cd11296 (CDD); IPR029044 (SUPERFAMILY)	no GO terms	no GO terms	---NA---	NA	415208	6.61998e-159	59016	0	XP_005844275.1	XP_005844275.1 hypothetical protein CHLNCDRAFT_59016 [Chlorella variabilis]<>EFN52173.1 hypothetical protein CHLNCDRAFT_59016 [Chlorella variabilis]	554065	0	7.84396	6.6328	4.68193	5.2231	4.08037	4.92896	NA	NA	NA	NA	NA	NA
NA	OG0000086	6	3	3	g9907	528	---NA---	---NA---	NA	NA	NA	NA	NA	IPR019378 (PFAM); cd11296 (CDD)	no GO terms	no GO terms	---NA---	NA	415208	3.69866e-100	59016	0	XP_005844275.1	XP_005844275.1 hypothetical protein CHLNCDRAFT_59016 [Chlorella variabilis]<>EFN52173.1 hypothetical protein CHLNCDRAFT_59016 [Chlorella variabilis]	554065	3.2e-191	15.5782	18.4353	11.8249	6.91949	4.65642	9.36502	NA	NA	NA	NA	NA	NA
1	OG0000087	4	4	4	g10464	346	A9TF79	SRK2A_PHYPA Serine/threonine-protein kinase SRK2A OS=Physcomitrella patens subsp. patens OX=3218 GN=SRK2A PE=1 SV=1	7.94934e-89	61.08	NA	NA	NA	IPR000719 (SMART); G3DSA:1.10.510.10 (GENE3D); PIRSF000654 (PIRSF); IPR000719 (PFAM); PTHR24343:SF418 (PANTHER); PTHR24343 (PANTHER); IPR017441 (PROSITE_PATTERNS); IPR000719 (PROSITE_PROFILES); cd14003 (CDD); IPR011009 (SUPERFAMILY)	F:GO:0004672; F:GO:0005524; P:GO:0006468	F:protein kinase activity; F:ATP binding; P:protein phosphorylation	Q940H6	5.64979e-90	185806	1.12447e-108	33664	0	XP_005851920.1	XP_005851920.1 hypothetical protein CHLNCDRAFT_33664 [Chlorella variabilis]<>EFN59818.1 hypothetical protein CHLNCDRAFT_33664 [Chlorella variabilis]	554065	2e-186	11.5739	14.0459	1.62067	3.66063	3.93635	2.02635	-1.73345	0.0222419	-1.595	0.0367289	NA	NA
NA	OG0000087	4	4	4	g10613	953	Q96301	SPY_ARATH Probable UDP-N-acetylglucosamine--peptide N-acetylglucosaminyltransferase SPINDLY OS=Arabidopsis thaliana OX=3702 GN=SPY PE=1 SV=1	0	70.93	NA	NA	NA	IPR019734 (SMART); G3DSA:3.40.50.2000 (GENE3D); IPR001440 (PFAM); PF13432 (PFAM); G3DSA:3.40.50.11380 (GENE3D); IPR011990 (G3DSA:1.25.40.GENE3D); IPR011990 (G3DSA:1.25.40.GENE3D); IPR011990 (G3DSA:1.25.40.GENE3D); PF13414 (PFAM); IPR019734 (PFAM); IPR029489 (PFAM); mobidb-lite (MOBIDB_LITE); PTHR44835:SF1 (PANTHER); PTHR44835 (PANTHER); IPR019734 (PROSITE_PROFILES); IPR019734 (PROSITE_PROFILES); …	F:GO:0005515	F:protein binding	Q96301	0	424659	2.00851e-68	59252	0	PRW61194.1	PRW61194.1 putative UDP-N-acetylglucosamine--peptide N-acetylglucosaminyltransferase SPINDLY [Chlorella sorokiniana]	3076	4.1e-205	130.605	137.192	124.551	104.06	148.141	120.431	NA	NA	NA	NA	NA	NA
NA	OG0000087	4	4	4	g188	385	P0C5D6	SAPK3_ORYSJ Serine/threonine-protein kinase SAPK3 OS=Oryza sativa subsp. japonica OX=39947 GN=SAPK3 PE=1 SV=1	9.1575e-91	63.73	NA	NA	NA	IPR000719 (SMART); IPR000719 (PFAM); G3DSA:1.10.510.10 (GENE3D); PIRSF000654 (PIRSF); PTHR24343 (PANTHER); PTHR24343:SF418 (PANTHER); IPR000719 (PROSITE_PROFILES); cd14003 (CDD); IPR011009 (SUPERFAMILY)	F:GO:0004672; F:GO:0005524; P:GO:0006468	F:protein kinase activity; F:ATP binding; P:protein phosphorylation	Q940H6	9.14982e-90	185806	1.0152e-122	57249	0	XP_005849560.1	XP_005849560.1 hypothetical protein CHLNCDRAFT_57249 [Chlorella variabilis]<>EFN57458.1 hypothetical protein CHLNCDRAFT_57249 [Chlorella variabilis]	554065	1.9e-214	75.4775	77.0088	80.073	46.6954	63.7977	55.2043	NA	NA	NA	NA	NA	NA
NA	OG0000087	4	4	4	g6787	312	Q7Y0B9	SAPK8_ORYSJ Serine/threonine-protein kinase SAPK8 OS=Oryza sativa subsp. japonica OX=39947 GN=SAPK8 PE=1 SV=1	1.02562e-81	63.94	NA	NA	NA	IPR000719 (SMART); G3DSA:1.10.510.10 (GENE3D); PIRSF000654 (PIRSF); IPR000719 (PFAM); mobidb-lite (MOBIDB_LITE); PTHR24343:SF418 (PANTHER); PTHR24343 (PANTHER); IPR000719 (PROSITE_PROFILES); cd14003 (CDD); IPR011009 (SUPERFAMILY)	F:GO:0004672; F:GO:0005524; P:GO:0006468	F:protein kinase activity; F:ATP binding; P:protein phosphorylation	Q9M9E9	7.45803e-83	185806	1.1208e-107	142950	0	XP_005849559.1	XP_005849559.1 hypothetical protein CHLNCDRAFT_142950 [Chlorella variabilis]<>EFN57457.1 hypothetical protein CHLNCDRAFT_142950 [Chlorella variabilis]	554065	1.7e-168	41.3042	52.8673	30.1925	35.5349	21.2659	28.4237	NA	NA	NA	NA	NA	NA
NA	OG0000088	6	3	3	g10517	890	---NA---	---NA---	NA	NA	NA	NA	NA	IPR001002 (SMART); IPR024535 (PFAM); IPR000922 (PFAM); IPR012334 (G3DSA:2.160.20.GENE3D); IPR036861 (G3DSA:3.30.60.GENE3D); G3DSA:2.60.120.740 (GENE3D); mobidb-lite (MOBIDB_LITE); mobidb-lite (MOBIDB_LITE); mobidb-lite (MOBIDB_LITE); IPR000922 (PROSITE_PROFILES); IPR001002 (PROSITE_PROFILES); cd00035 (CDD); IPR011050 (SUPERFAMILY); IPR011050 (SUPERFAMILY); IPR036861 (SUPERFAMILY)	F:GO:0008061; F:GO:0030246	F:chitin binding; F:carbohydrate binding	O22841	4.99521e-06	---NA---	NA	133512	0	XP_005851900.1	XP_005851900.1 hypothetical protein CHLNCDRAFT_133512 [Chlorella variabilis]<>EFN59798.1 hypothetical protein CHLNCDRAFT_133512 [Chlorella variabilis]	554065	0	33.7893	27.9943	40.5167	26.1601	17.9536	27.2188	NA	NA	NA	NA	NA	NA
3	OG0000088	6	3	3	g623	867	---NA---	---NA---	NA	NA	NA	NA	NA	IPR024535 (PFAM); IPR012334 (G3DSA:2.160.20.GENE3D); G3DSA:2.60.120.740 (GENE3D); IPR000922 (PFAM); mobidb-lite (MOBIDB_LITE); mobidb-lite (MOBIDB_LITE); mobidb-lite (MOBIDB_LITE); IPR011050 (SUPERFAMILY); IPR011050 (SUPERFAMILY)	F:GO:0030246	F:carbohydrate binding	---NA---	NA	---NA---	NA	137067	0	XP_005845441.1	XP_005845441.1 hypothetical protein CHLNCDRAFT_137067 [Chlorella variabilis]<>EFN53339.1 hypothetical protein CHLNCDRAFT_137067 [Chlorella variabilis]	554065	0	0.877645	0.195082	10.3243	8.66052	6.86462	6.35288	4.60477	1.95063e-10	4.12702	1.37612e-08	NA	NA
NA	OG0000088	6	3	3	g624	930	P22031	LEG_HELCR D-galactoside-specific lectin OS=Heliocidaris crassispina OX=1043166 PE=1 SV=1	1.30617e-06	66.67	46	F:GO:0000166; P:GO:0002318; F:GO:0004672; F:GO:0004674; F:GO:0005524; C:GO:0005634; C:GO:0005737; C:GO:0005739; C:GO:0005886; P:GO:0006468; P:GO:0007165; P:GO:0008542; P:GO:0010628; P:GO:0010764; C:GO:0016020; F:GO:0016301; P:GO:0016310; F:GO:0016740; P:GO:0030154; P:GO:0030878; P:GO:0035019; P:GO:0035556; P:GO:0035690; P:GO:0042127; C:GO:0043005; P:GO:0043367; P:GO:0043368; P:GO:0043369; P:GO:00…	F:nucleotide binding; P:myeloid progenitor cell differentiation; F:protein kinase activity; F:protein serine/threonine kinase activity; F:ATP binding; C:nucleus; C:cytoplasm; C:mitochondrion; C:plasma membrane; P:protein phosphorylation; P:signal transduction; P:visual learning; P:positive regulation of gene expression; P:negative regulation of fibroblast migration; C:membrane; F:kinase activity;…	Coil (COILS); Coil (COILS); IPR024535 (PFAM); G3DSA:2.60.120.740 (GENE3D); IPR012334 (G3DSA:2.160.20.GENE3D); IPR000922 (PFAM); mobidb-lite (MOBIDB_LITE); mobidb-lite (MOBIDB_LITE); mobidb-lite (MOBIDB_LITE); mobidb-lite (MOBIDB_LITE); mobidb-lite (MOBIDB_LITE); PTHR45733:SF8 (PANTHER); PTHR45733 (PANTHER); IPR000922 (PROSITE_PROFILES); IPR011050 (SUPERFAMILY); IPR011050 (SUPERFAMILY)	F:GO:0030246	F:carbohydrate binding	---NA---	NA	---NA---	NA	137066	0	XP_005845440.1	XP_005845440.1 hypothetical protein CHLNCDRAFT_137066 [Chlorella variabilis]<>EFN53338.1 hypothetical protein CHLNCDRAFT_137066 [Chlorella variabilis]	554065	0	11.7385	8.48608	5.94245	8.5266	9.07281	4.76466	NA	NA	NA	NA	NA	NA
NA	OG0000090	6	1	5	g1260	456	A8GYV6	TRMA_SHEPA tRNA/tmRNA (uracil-C(5))-methyltransferase OS=Shewanella pealeana (strain ATCC 700345 / ANG-SQ1) OX=398579 GN=trmA PE=3 SV=1	9.34321e-138	72.51	9	F:GO:0004721; F:GO:0004725; P:GO:0006470; C:GO:0016020; C:GO:0016021; P:GO:0016311; F:GO:0016787; F:GO:0016791; P:GO:0035335	F:phosphoprotein phosphatase activity; F:protein tyrosine phosphatase activity; P:protein dephosphorylation; C:membrane; C:integral component of membrane; P:dephosphorylation; F:hydrolase activity; F:phosphatase activity; P:peptidyl-tyrosine dephosphorylation	IPR011869 (TIGRFAM); IPR010280 (PFAM); G3DSA:3.40.1350.30 (GENE3D); G3DSA:3.40.50.150 (GENE3D); mobidb-lite (MOBIDB_LITE); mobidb-lite (MOBIDB_LITE); IPR011869 (PANTHER); IPR030390 (PROSITE_PATTERNS); IPR030391 (PROSITE_PATTERNS); IPR011869 (HAMAP); IPR010280 (PROSITE_PROFILES); cd02440 (CDD); IPR029063 (SUPERFAMILY)	P:GO:0006396; F:GO:0008173; F:GO:0030697	P:RNA processing; F:RNA methyltransferase activity; F:S-adenosylmethionine-dependent tRNA (m5U54) methyltransferase activity	Q9LU28	1.13792e-08	101596	9.51041e-142	20361	0	XP_005850110.1	XP_005850110.1 hypothetical protein CHLNCDRAFT_20361 [Chlorella variabilis]<>EFN58008.1 hypothetical protein CHLNCDRAFT_20361 [Chlorella variabilis]	554065	7.4e-221	26.0002	26.4337	44.3583	23.7495	36.2433	26.945	NA	NA	NA	NA	NA	NA
NA	OG0000091	5	4	3	g5089	582	P26221	GUN4_THEFU Endoglucanase E-4 OS=Thermobifida fusca OX=2021 GN=celD PE=1 SV=2	3.27382e-70	52.27	NA	NA	NA	IPR001701 (PFAM); IPR012341 (G3DSA:1.50.10.GENE3D); mobidb-lite (MOBIDB_LITE); mobidb-lite (MOBIDB_LITE); PTHR22298:SF114 (PANTHER); PTHR22298 (PANTHER); IPR033126 (PROSITE_PATTERNS); IPR008928 (SUPERFAMILY)	F:GO:0003824; F:GO:0004553; P:GO:0005975	F:catalytic activity; F:hydrolase activity, hydrolyzing O-glycosyl compounds; P:carbohydrate metabolic process	Q8S8Q4	3.5827e-62	142120	1.92119e-58	133737	0	XP_005847543.1	XP_005847543.1 hypothetical protein CHLNCDRAFT_133737 [Chlorella variabilis]<>EFN55441.1 hypothetical protein CHLNCDRAFT_133737 [Chlorella variabilis]	554065	1.1e-298	25.4517	18.0451	9.00371	7.18734	6.28856	11.2818	NA	NA	NA	NA	NA	NA
3	OG0000091	5	4	3	g5418	462	P26221	GUN4_THEFU Endoglucanase E-4 OS=Thermobifida fusca OX=2021 GN=celD PE=1 SV=2	6.76877e-70	50.85	NA	NA	NA	IPR001701 (PFAM); IPR012341 (G3DSA:1.50.10.GENE3D); PTHR22298 (PANTHER); PTHR22298:SF114 (PANTHER); IPR033126 (PROSITE_PATTERNS); IPR008928 (SUPERFAMILY)	F:GO:0003824; F:GO:0004553; P:GO:0005975	F:catalytic activity; F:hydrolase activity, hydrolyzing O-glycosyl compounds; P:carbohydrate metabolic process	Q8S8Q4	3.45512e-67	142120	7.92651e-56	141891	0	XP_005850238.1	XP_005850238.1 hypothetical protein CHLNCDRAFT_141891 [Chlorella variabilis]<>EFN58136.1 hypothetical protein CHLNCDRAFT_141891 [Chlorella variabilis]	554065	1e-262	25.0677	32.3837	135.836	24.2405	54.4369	47.9752	1.80375	0.0159899	NA	NA	NA	NA
NA	OG0000091	5	4	3	g5420	563	O48766	GUN11_ARATH Endoglucanase 11 OS=Arabidopsis thaliana OX=3702 GN=At2g32990 PE=2 SV=1	1.95727e-73	49.08	2	F:GO:0003723; C:GO:0005634	F:RNA binding; C:nucleus	IPR001701 (PFAM); IPR012341 (G3DSA:1.50.10.GENE3D); PTHR22298 (PANTHER); PTHR22298:SF114 (PANTHER); IPR033126 (PROSITE_PATTERNS); IPR008928 (SUPERFAMILY)	F:GO:0003824; F:GO:0004553; P:GO:0005975	F:catalytic activity; F:hydrolase activity, hydrolyzing O-glycosyl compounds; P:carbohydrate metabolic process	O48766	1.08255e-74	142120	1.79979e-60	8109	0	XP_005849981.1	XP_005849981.1 hypothetical protein CHLNCDRAFT_8109, partial [Chlorella variabilis]<>EFN57879.1 hypothetical protein CHLNCDRAFT_8109, partial [Chlorella variabilis]	554065	2.5e-218	11.0254	7.4619	5.3422	7.90161	3.98436	7.11961	NA	NA	NA	NA	NA	NA
[truncated: 11,063 more rows]
